# Supplementary material for: Label-Free Quantitative Mass Spectrometry Reveals a Panel of Differentially Expressed Proteins in Colorectal Cancer
Source: Hindawi journal article supplement (doi:10.1155/2015/365068), 2015-01-01
Supplement: f1 [file 365068.f1.zip]

Archive with 3 entries (2 files):
- 365068.f1/
- 365068.f1/1191061.xlsx
- 365068.f1/mat.365068.doc
