# Supplementary material for: Label-Free Quantitative Mass Spectrometry Reveals a Panel of Differentially Expressed Proteins in Colorectal Cancer
Source: Hindawi journal article supplement (doi:10.1155/2015/365068), 2015-01-01
Supplement: f1 [file 365068.f1.zip › 365068.f1/1191061.xlsx]

## Sheet: peptideGroup
id	Protein Group IDs	Sequence	Length	Missed Cleavages	Mass	Score	C1	C2	C3	N1	N2	N3	Intensity C1	Intensity C2	Intensity C3	Intensity N1	Intensity N2	Intensity N3
0	550	AAAAAAAAAAAAAAAGAGAGAK	22	0	1595.84	125.92						1	0	0	0	0	0	128270
1	130	AAAAAAAAAAGAAGGR	16	0	1197.62	127.61	1	2	2	1	1	3	371590	247030	794040	465680	311140	168780
2	85	AAAAAAALQAK	11	0	955.545	196.05	2	1	2	1	1	1	1255900	67642	1417300	344690	948110	2827100
3	72	AAAAAAGAGPEMVR	14	0	1241.62	114.84	1	1	1	1		1	308610	150440	117660	454020	0	267770
4	353	AAAAAAGEAR	10	0	857.436	129.87	2	1	1	2			71782	315300	29697	300790	0	0
5	862	AAAAAATAAAAASIR	15	0	1256.68	104.29	1				1		503180	0	0	0	117240	0
6	1560	AAAAAGTATSQR	12	0	1074.54	133.67	1	1	2	1	1	1	62528	265250	49477	38491	55677	80821
7	1372	AAAAEGVLATR	11	0	1028.56	96.928	1	1	1	1	1	1	112010	8377.6	82250	12145	215590	59187
8	76	AAAAELSLLEK	11	0	1114.62	118.18		1	1	1	1	1	0	214640	213650	41915	90862	103610
9	373	AAAAMAAAAGGGAGAAR	17	0	1314.65	96.225	1	1	1	1			88632	37375	40090	65178	0	0
10	1442	AAAAVQGGR	9	0	799.43	137.39	2	1	1	1		1	57505	38788	86276	341270	0	19826
11	837	AAAAVVEFQR	10	0	1060.57	117.49	2	1	2	1	1		151100	197680	124690	150190	11313	0
12	219	AAAEAAAEAK	10	0	901.451	108.63			1	1			0	0	5432.1	34787	0	0
13	1176	AAAEVNQDYGLDPK	14	0	1489.7	168.25	1	1	1	1	1	1	98537	203510	46503	323040	456330	965760
14	369	AAAFEQLQK	9	0	1004.53	81.735		1		1	1	1	0	123540	0	62106	116850	235120
15	1167	AAAGEDYK	8	0	823.371	103.28	1	2	1	2			5449	58357	32825	63478	0	0
16	928	AAAGEFADDPCSSVK	15	0	1523.66	112.05	1	1	1	1			74159	117070	45110	199220	0	0
17	797	AAAGELQEDSGLCVLAR	17	0	1758.86	141.24						1	0	0	0	0	0	208480
18	177	AAAGGGGGGAAAAGR	15	0	1070.52	201.38	1	2	2	1	1	1	0	200800	92004	172210	57244	142280
19	95	AAALAHLDR	9	0	936.514	120					1	1	0	0	0	0	2118100	155700
20	336	AAALEFLNR	9	0	1003.55	132.56					1		0	0	0	0	129920	0
21	860	AAAMANNLQK	10	0	1030.52	98.711			1				0	0	21807	0	0	0
22	1613	AAAPAPEEEMDECEQALAAEPK	22	0	2356.02	168.67	1	1	1	2	1	1	41071	288260	181290	259930	63592	160850
23	796	AAASGSVLQR	10	0	958.52	123.95	2		1	1			112520	0	58585	44841	0	0
24	1261	AAASTDYYK	9	0	988.45	87.528			1		1		0	0	27072	0	61678	0
25	415	AAATAEEPDPK	11	0	1098.52	130.91	1	1	1	2			5910.7	23915	11338	15423	0	0
26	464	AAATGAVAASAASGQAEGK	19	0	1587.79	146.13	1	1	1	1			56366	98663	136020	107600	0	0
27	1104	AAATGPSFWLGNETLK	16	0	1661.84	148.02		1	1	1	2	2	0	317140	358350	90681	284770	392260
28	1559	AAATLMSER	9	0	948.47	163.67		2	1		1	1	0	564560	419030	0	588140	844020
29	1495	AAATPESQEPQAK	13	0	1326.64	166.59		1	1	1			0	64992	64875	38778	0	0
30	1004	AAATTAQEYLK	11	0	1165.6	144.8	1	2	1	1	1	1	34194	1039000	296610	304250	397310	805810
31	602	AAAVAAAGAGEPQSPDELLPK	21	0	1962.01	144.24	1	1	2	2	2	2	117230	26391	294570	399650	195310	138470
32	420	AAAVADEAVAR	11	0	1042.54	105.58	1	1		1			18348	27515	0	21906	0	0
33	1120	AAAVGTANK	9	0	801.434	89.389	1						57205	0	0	0	0	0
34	1123	AAAVLPVLDLAQR	13	0	1335.79	86.491					1		0	0	0	0	809930	0
36	159	AACNGPYDGK	10	0	1051.44	81.413		1	1	1			0	16458	13133	15479	0	0
37	657	AADAVEDLR	9	0	958.472	123.96		2	1	2	2	2	0	305110	20097	131610	465600	384150
38	545	AADDTWEPFASGK	13	0	1393.62	144.81					1	1	0	0	0	0	477490	165600
39	431	AADFIDQALAQK	12	0	1289.66	138.93	1	1			1	1	36577	12805	0	0	515650	132890
40	576	AADGSAVSTVTK	12	0	1105.56	218.98	1			1	1	2	357680	0	0	111470	327780	681700
41	371	AADLNGDLTATR	12	0	1216.6	139.34		1	1	1			0	174580	19355	166980	0	0
42	1377	AAEDDEDDDVDTK	13	0	1436.54	177.96	1	1	1	1			9417.2	233660	24101	86682	0	0
43	1377	AAEDDEDDDVDTKK	14	1	1564.64	178.57		1		1			0	52751	0	37103	0	0
44	939	AAEDYGVIK	9	0	964.487	155.39	1	2	2	2	2	2	4592800	12008000	562140	13540000	35197000	52348000
45	987	AAEEIGIK	8	0	829.455	85.274	1	1					48086	227630	0	0	0	0
46	370	AAEEVEAK	8	0	845.413	123.22				1			0	0	0	67339	0	0
47	877	AAEVLNK	7	0	743.418	93.049	1		1	1			19103	0	62626	110610	0	0
48	963;1253	AAFGLSEAGFNTACVTK	17	0	1742.83	117.7					1		0	0	0	0	183710	0
50	1613	AAGTLYTYPENWR	13	0	1540.73	226.33	2	1	1	1	3	1	954890	3268800	1707600	2016200	1096800	811470
51	877	AAGVEAAAEVAATEIK	16	0	1499.78	198.65	1	1	1	1	1		108000	184450	391240	249770	810570	0
52	744	AAIDSYR	7	0	794.392	117.88	1	1	1		1	1	158620	321720	40447	0	97430	275720
53	400	AAIISAEGDSK	11	0	1060.54	106.23		1	1	1			0	438100	104870	361120	0	0
54	917	AAILETAPK	9	0	912.528	126.68			1	1			0	0	40841	64023	0	0
55	886	AAILGDTIMVAK	12	0	1201.67	105.12						1	0	0	0	0	0	108350
56	858	AAIQSQLDGVR	11	0	1156.62	95.457	1		1				375560	0	90096	0	0	0
57	1134	AAISGENAGLVR	12	0	1156.62	220.02		2		1	1	1	0	142190	0	291370	289470	721740
58	1606	AAIYGGVEGGGTR	13	0	1206.6	140.56	1	1	1	1			357950	230710	141150	344230	0	0
59	353	AALDGTPGMIGYGMAK	16	0	1551.74	112.13					1	1	0	0	0	0	211100	126600
60	1538	AALEACHK	8	0	898.433	96.624				1	2	2	0	0	0	7305.7	237920	719610
61	1212;1625	AALEALLGR	9	0	912.539	131.39					1		0	0	0	0	288170	0
63	650	AALQEELQLCK	11	0	1301.66	131.31				1	1	1	0	0	0	8832.6	69585	115400
64	307	AALQELLSK	9	0	971.565	160.63					1		0	0	0	0	192170	0
65	26	AALSASEGEEVPQDK	15	0	1529.72	93.102					1	1	0	0	0	0	143310	209040
66	892	AALTTLFK	8	0	863.512	105.55					1		0	0	0	0	353910	0
67	1515	AALVDLEPGTMDSVR	15	0	1572.78	115.41					1		0	0	0	0	371180	0
68	235	AAMDNSEIAGEK	12	0	1234.55	158.05		1	1	1			0	89293	7664.8	133990	0	0
69	1204	AAMEPIVISAK	11	0	1128.62	129.39					2	2	0	0	0	0	750320	1855900
70	1092	AAMPPQIIQFPEDQK	15	0	1711.86	120.81					1	2	0	0	0	0	104250	3115800
71	1061	AANATTNPSQLLPLELVDK	19	0	1994.07	104.24		1	1	1	1	1	0	144010	193310	86535	142710	319060
72	42	AANDAGYFNDEMAPIEVK	18	0	1953.88	162.95					2	1	0	0	0	0	401510	474750
73	1120	AANFENHSGK	10	0	1073.49	123.88					1	1	0	0	0	0	289380	399800
74	1035	AANGVVLATEK	11	0	1071.59	106.09		1	1	1	1	1	0	346370	16832	60933	59180	0
75	238	AAPEASGTPSSDAVSR	16	0	1501.7	160.09		2	1	1			0	234240	73771	66125	0	0
76	1470	AAPEGSGLGEDAR	13	0	1228.57	95.205	1		1	1			93849	0	58184	81676	0	0
77	1592;853;1623	AAPSVTLFPPSSEELQANK	19	0	1985.01	176.16	1	2	3	2	5	2	455510	790590	474720	485860	8126800	26839000
78	1535	AAQASDLEK	9	0	931.461	138.95	1	1	1	1	1		76232	323490	189600	261450	68762	0
79	1433	AAQEEYVK	8	0	936.455	146.56	1	1	1	2	1	2	448050	3028800	454920	1952700	760620	765980
80	1501	AAQGEPQVQFK	11	0	1201.61	195.72	2	2	1	1	1	2	1045100	2106700	1699300	1421000	516890	913420
81	423	AAQLCGAGMAAVVDK	15	0	1460.71	137.31						1	0	0	0	0	0	201440
82	1405	AASAAAASAAAASAASGSPGPGEGSAGGEK	30	0	2386.1	143.34	1			1			97659	0	0	144860	0	0
83	794	AASADSTTEGTPADGFTVLSTK	22	0	2126	187.77		1	1		1	2	0	305300	257730	0	146820	433030
84	806	AASAYAVGDVK	11	0	1050.53	102.05	1						77682	0	0	0	0	0
85	1054	AASCVLLHTGQK	12	0	1283.67	180.3	1	1	1	1	2	2	94099	238280	608890	138570	1646000	2341500
86	1562	AASGFNAMEDAQTLR	15	0	1580.73	227.41			1	1	1	2	0	0	60119	30212	1709700	2004600
87	1181	AASGTQNNVLR	11	0	1129.58	118.29		1	1				0	49177	17268	0	0	0
88	655	AASITSEVFNK	11	0	1165.6	101.87						1	0	0	0	0	0	95278
89	1265	AASTDMAGLEESFR	14	0	1483.66	145	1			1	1	1	322670	0	0	781560	338010	771740
90	313	AATAAAVVAEEDTELR	16	0	1615.81	99.068			1	1			0	0	61686	115830	0	0
91	1040	AATASAGAGGIDGKPR	16	1	1398.72	83.039		1	1	1			0	4789.6	113530	12966	0	0
92	773	AATGECTATVGK	12	0	1164.54	175.86	1	1	2	2	1	1	292350	206740	65253	461980	181120	992750
93	1389	AATSEGVQVK	10	0	988.519	93.02	1	1		1			6749.8	10003	0	25644	0	0
94	1424	AATSPALFNR	10	0	1046.55	97.784						1	0	0	0	0	0	0
95	514	AATVGSLAGQPLQER	15	0	1496.79	132.91	1	1	1	1		1	143050	100420	106750	90672	0	1080100
96	951	AAVAGEDGR	9	0	844.404	100.51	1	1	1	1			26916	494030	99032	5496.9	0	0
97	263	AAVDAGFVPNDMQVGQTGK	19	0	1903.91	130.7			1	1	1	1	0	0	83877	140700	53815	284120
98	1624	AAVDTYCR	8	0	954.423	151.04	1	1	1	1			35408	914190	30989	216100	0	0
99	67	AAVGELPEK	9	0	912.492	110.6			1	1			0	0	12839	67878	0	0
100	1120	AAVHLEGK	8	0	823.455	99.559		1			1	1	0	41599	0	0	620120	473140
101	708	AAVILESIFLK	11	0	1202.73	115.83			1	1			0	0	31324	15759	0	0
102	1445	AAVLWEVK	8	0	914.523	142.03					1		0	0	0	0	74379	0
103	1428;941	AAVPSGASTGIYEALELR	18	0	1803.94	184.93					1		0	0	0	0	205700	0
104	349	AAVQAAEVK	9	0	885.492	140.5		2	1	1		2	0	322030	0	118160	0	186490
105	497	AAYEAELGDAR	11	0	1164.54	175.3	1	2	1	1	1	2	220970	4942000	379420	1683800	35460000	45177000
106	1124;558	AAYFGVYDTAK	11	0	1204.58	79.766		1		1	1	1	0	1281700	0	1557600	386050	193980
107	1006	AAYLQETGKPLDETLK	16	1	1775.93	174.6					1	1	0	0	0	0	431960	163090
108	413	AAYNLVR	7	0	805.445	100.05		1	1	1	1	1	0	291980	41746	63095	3106600	410310
109	1254	AAYNQVK	7	0	792.413	93.981		1	1	1			0	19354	7679.5	97672	0	0
110	639	ACADATLSQITNNIDPVGR	19	0	2014.97	192.59				1	2	3	0	0	0	13333	511810	1182400
111	815	ACCGVPCK	8	0	950.377	128.5	1	1	1	1	1	1	964680	92948	54125	691840	394350	927560
112	1549	ACEPGVDYVYK	11	0	1299.58	184.87	1	1	1	1	1	1	51817	792090	201660	438650	1605800	2758200
113	744	ACGCAAAPDVK	11	0	1118.48	154.84	1	1	1	1			116720	164380	34020	27080	0	0
114	64	ACGDSTLTQITAGLDPVGR	19	0	1930.94	160.33					1		0	0	0	0	518160	0
115	1021	ACGLVASNLNLK	12	0	1258.67	153.13	1	1	1		2	1	769290	153380	96285	0	986760	619070
116	1021	ACGLVASNLNLKPGECLR	18	1	1971	232.76	1				2	2	32334	0	0	0	7508700	302820
117	473	ACIDSNEDGDLSK	13	0	1422.59	200.19		1					0	0	0	0	0	0
118	570	ACIGDTLCQK	10	0	1164.53	80.098		1	1	1			0	26881	64590	49738	0	0
119	330	ACLISLGYDVENDR	14	0	1623.76	108.96					1		0	0	0	0	144440	0
120	144	ACVVHGSDLK	10	0	1084.53	125.32					2	2	0	0	0	0	394110	483760
121	274	ACYGVLR	7	0	837.417	91.992			1		1	1	0	0	12602	0	666780	240550
122	652	ADAECYTAMK	10	0	1158.47	174.79		1		1			0	110280	0	43282	0	0
123	948	ADAEEEAATR	10	0	1061.46	202.06	1	2		1			16812	86974	0	78420	0	0
124	1204	ADAEGESDLENSR	13	0	1391.58	208.59	1	1		1	1	1	122040	285040	0	13926	88048	299590
125	1462	ADALQAGASQFETSAAK	17	0	1664.8	280.71	1	1	1	1	1	1	164790	118870	115570	310520	656810	1064700
126	555	ADDILASPPR	10	0	1053.55	104.12		1				1	0	148790	0	0	0	394690
129	576	ADEALAGLDEGALR	14	0	1399.69	183.48	2	1	1	1		1	2011900	88166	30306	190130	0	461660
130	650	ADEASELACPTPK	13	0	1387.63	162.29		1					0	311270	0	0	0	0
131	1301	ADEDPALFQSVK	12	0	1318.64	154.53	1				2	1	32241	0	0	0	314940	187820
132	569	ADEELEALR	9	0	1044.51	118.69	1	1		1			77120	86868	0	0	0	0
133	36	ADEGISFR	8	0	893.424	145.85		2	1	1	1	2	0	1224400	227880	144390	2200500	2426100
134	449	ADEWLMK	7	0	891.416	149.14		1			1	1	0	124320	0	0	199910	251940
135	218	ADFQGISPER	10	0	1118.54	120		2	1		1	1	0	297830	197500	0	439580	384840
136	449	ADGAEAKPAE	10	1	957.44	84.934	1	1		1			14571	23175	0	52634	0	0
137	985	ADGELNVDSLITR	13	0	1401.71	117.69	1	2	1	2	1	1	1176000	654390	411940	695360	351000	650350
138	376	ADGGTQVIDTK	11	0	1103.55	122.86	1						0	0	0	0	0	0
139	762	ADGQVAELLLR	11	0	1183.66	92.856		1	1	1	1	1	0	40935	32290	11219	215140	195410
140	1397	ADGYEPPVQESV	12	0	1289.58	128.77	1		1	1	1	1	204700	0	264440	470290	223280	46112
141	950	ADGYVLEGK	9	0	950.471	145.09		2	2	3	1	1	0	2109400	151410	373460	589440	567130
142	509	ADIDVSGPSVDTDAPDLDIEGPEGK	25	0	2511.15	165.78						1	0	0	0	0	0	133320
143	211	ADIEEIK	7	0	816.423	107.82	1	1	1	1	1		19334	238910	16736	41448	129490	0
144	1106	ADIEMPFDPSK	11	0	1248.57	156.01				1	1	1	0	0	0	13051	224320	408700
145	1549	ADIGCTPGSGK	11	0	1061.48	139.5	2	2	1	2	1	1	124860	456760	3879.2	167830	54518	58506
146	144	ADIGVAMGIAGSDVSK	16	0	1489.74	138.03					1		0	0	0	0	656050	0
147	609	ADIQTER	7	0	831.409	102.55		1	1	1	1	1	0	131650	118440	105680	136720	231200
148	495	ADLAEEYSK	9	0	1024.47	156.83		1	2	2	1	2	0	349450	69004	412550	279840	419630
149	509	ADLDVSGPK	9	0	900.455	102.21	2	2	4	2	1	1	527010	603250	674360	714990	727400	1028000
150	1130	ADLEAQR	7	0	801.398	102.75		1		1		1	0	163150	0	57332	0	21326
151	633	ADLEEQLSDEEK	12	0	1404.63	108.01	1	1	1	1	2	1	1216300	431180	118130	417170	743470	499970
152	509	ADLGVSGPK	9	0	842.45	98.654	1	1		1			82085	16259	0	74597	0	0
153	1386;1320	ADLINNLGTIAK	12	0	1241.7	162.58		1	1	1	2	2	0	155780	181690	24701	9610200	13912
154	797	ADLNQGIGEPQSPSR	15	0	1567.76	106.52		1		1		1	0	37267	0	87814	0	19084
155	1477	ADLSGITGAR	10	0	959.504	120.35		1		1	1	1	0	62518	0	188270	269780	701420
156	187	ADMQNLVER	9	0	1074.51	146.64	1	1	2	1	1	1	1597100	646410	544990	1058800	82588	942850
157	825	ADMVETQQLMR	11	0	1320.62	169.87					1	1	0	0	0	0	2765300	2838000
158	1031	ADNFEYSDPVDGSISR	16	0	1770.77	188.81	1	1	1	1	1	2	39740	160400	82407	288630	461650	212870
159	238	ADQCYEDVR	9	0	1154.47	247.02		1		1			0	681200	0	102040	0	0
160	1204	ADQDSEAMK	9	0	993.407	113.75	1			1			8151.6	0	0	7610.5	0	0
161	318	ADQLCQQELR	10	0	1259.59	183.91	1	1	1	1	1	1	23032	60204	16571	115610	671660	1059800
162	816	ADQLTEEQIAEFK	13	0	1520.74	234.05	2	2	1	2	2	1	36747000	23678000	8939200	25377000	19937000	24098000
163	996	ADSELQLVEQR	11	0	1286.65	103.51	1	2	1	1	1		645860	879060	489530	1118900	906790	0
164	1592;853;1623	ADSSPVK	7	0	702.355	97.723	1	2	1	1			136860	166410	49021	166940	0	0
165	1077	ADTLGELDLER	11	0	1230.61	171.51	1	1			1	1	18294	9489	0	0	259820	101070
166	1418	ADTLTLEER	9	0	1046.52	82.138		1			1	1	0	154420	0	0	430030	252480
167	345	ADTLTLK	7	0	760.433	99.117		1					0	209780	0	0	0	0
168	780	ADTLTPEECQQFK	13	0	1565.7	180.64	1	1	1	1	1	1	303680	252970	132640	301960	720620	1152300
169	717	ADTQTYQPYNK	11	0	1327.6	162.71		1		1			0	127680	0	60825	0	0
170	1426	ADVDAATLAR	10	0	1001.51	188.51	1	1	1	3	1	1	20782000	72912	28815	3079100	27809	168850
171	509	ADVDISGPK	9	0	900.455	100.05	2		1	1	1		1424200	0	12291	1089200	54790	0
172	509	ADVDVSGPK	9	0	886.44	135.94	3	1	3	2	1	1	467070	122560	87840	535900	269610	354750
173	1432	ADVLTTGAGNPVGDK	15	0	1413.71	154.59	1	2	2	2	1	2	267860	408240	266040	548540	737460	1140400
174	1578	ADVVESWIGEK	11	0	1231.61	116.76				1	1	1	0	0	0	13757	905190	0
175	509	ADVVVSGPK	9	0	870.481	112.56	2	2	2	3	1	2	361240	86371	64201	275140	324050	412940
176	152	ADYEIASK	8	0	895.429	148.83	1	2	2	2		1	11946	165190	56893	102900	0	88323
177	23	AEADVASLNR	10	0	1044.52	199.93	1	2	1	3	1	1	13867000	1291100	60623	6133000	17910000	29946000
178	362	AEAELLQQQK	10	0	1156.61	197.43				1		1	0	0	0	47409	0	96562
180	189	AEAGAGSATEFQFR	14	0	1440.66	82.365					1		0	0	0	0	58518	0
181	658	AEAGDNLGALVR	12	0	1184.61	209.06		1	1		1	1	0	110900	82370	0	878340	804410
182	37	AEAGPEGVAPAPEGEK	16	0	1507.72	199.31		1					0	230430	0	0	0	0
183	983	AEAQAQYSAAVAK	13	0	1306.65	88.485		1		1			0	14701	0	42305	0	0
184	509	AEASIQAGAGDGEWEESEVK	20	0	2061.91	110.28						1	0	0	0	0	0	44369
185	1204	AEASQLGHK	9	0	939.477	109.95					1	1	0	0	0	0	104720	196410
186	751	AEAVESAQAGDK	12	0	1174.55	126.85		1		1			0	85754	0	36726	0	0
187	653	AECLNPSQPSR	11	0	1257.58	82.012					1	1	0	0	0	0	76433	155650
188	253	AECMLQQAER	10	0	1234.54	183.31		2	1	2	1	1	0	455000	204330	352970	281270	215080
189	965	AEDGENYDIK	10	0	1152.49	174.8		1	1	1			0	116670	16901	71053	0	0
190	1419	AEDGSVIDYELIDQDAR	17	0	1907.87	219.05		1			4	5	0	60998	0	0	2458900	2693800
191	326	AEDKEWMPVTK	11	1	1332.64	116.65					1	1	0	0	0	0	319050	126400
192	1619;1617;23	AEDSLLAAEEAAAK	14	0	1387.68	235.9	1	1			3	4	3861600	41662	0	0	17179000	39533000
193	1600	AEDTAVYYCAK	11	0	1289.56	181.12	1	1		1	1	1	114060	174020	0	99489	130430	238710
194	1573;1554;1487	AEDTAVYYCAR	11	0	1317.57	179.39	1	2	1	1	1	1	142140	264070	47451	140490	358520	518180
195	483	AEEDEILNR	9	0	1087.51	141.16	1	1	1	1			52721	210740	206400	452720	0	0
196	829	AEEDVEPECIMEK	13	0	1577.66	144.63	1	1	1	1	1	1	33236	130210	46839	114810	236640	312790
197	81	AEEEFNIEK	9	0	1107.51	102.07		1		1			0	234050	0	34333	0	0
198	1156	AEELVLER	8	0	957.513	117.31	2	1	2	1	1	2	1785600	808390	264770	863400	948480	1862200
199	266	AEEQPQVELFVK	12	0	1415.73	130.63	1	2	1	1	1	1	1791700	3045400	1174900	1773300	298240	913680
200	79	AEEYEFLTPVEEAPK	15	0	1750.83	108.24		1	1		1		0	51618	47561	0	107760	0
202	1498	AEFGPPGPGAGSR	13	0	1198.57	139.66		1				1	0	119370	0	0	0	200020
203	1388	AEFQDALEK	9	0	1049.5	137.05		1			1	1	0	315830	0	0	214040	601510
204	1234	AEFTVETR	8	0	951.466	157.41	1	1	1	2	1	2	243260	116270	108490	44102	2051300	2512900
205	1206	AEGAATEEEGTPK	13	0	1288.58	110.94	1	1	1	1			13689	59908	7863.7	28324	0	0
206	259	AEGDVAALNR	10	0	1014.51	181.53	1	3	3	3	1	1	299640	972680	344240	383440	532150	1125400
207	509	AEGPEVDVNLPK	12	0	1266.65	171.87	1	1	1	1	1	3	1018600	593150	938660	2947200	915170	1831700
208	896	AEGPGLNR	8	0	812.414	99.295	1						173010	0	0	0	0	0
209	1234	AEGPGLSR	8	0	785.403	121.78		1	1	1	1	1	0	327430	75597	74173	23297	10308
210	261	AEGSEIR	7	0	760.372	116.98	1	1	1	1			43231	517630	9348.3	74288	0	0
211	896	AEIAFEDR	8	0	949.451	140.77		1			1	2	0	34983	0	0	431640	738910
212	1562	AEIDMLDIR	9	0	1074.54	110.79					1		0	0	0	0	64674	0
213	1106	AEISCIDNK	9	0	1048.49	134.32	2		1	2			154580	0	98719	309390	0	0
214	1234	AEISFEDR	8	0	965.445	125.96	1	2			1	2	77482	87693	0	0	5321000	8138400
215	222	AELDEVNK	8	0	916.45	96.909		1	1	1	1		0	67247	41778	266910	25669	0
216	1584	AELDTVCR	8	0	962.449	118.5		1	1	1			0	492740	40858	30436	0	0
217	125	AELFTQSCADLDK	13	0	1496.68	260.9				1	1	1	0	0	0	13649	191460	405990
218	274	AELNEFLTR	9	0	1091.56	162.84			1		2	1	0	0	11307	0	959220	406940
219	513	AELQEGAR	8	0	872.435	140.28	3	3	2	3	1	1	769750	4421100	179450	1436400	1737000	2529700
220	1212;1625	AELQELNAR	9	0	1042.54	191.63					1	1	0	0	0	0	526550	781830
221	1243	AELQQLR	7	0	856.477	127.68		1	1	1			0	11708	30418	60984	0	0
222	1617	AELSEGQVR	9	0	987.499	136		3	1	2	2	1	0	1506700	33057	332040	415030	504530
223	1305	AELSSLQTAR	10	0	1074.57	165.38		1			1	1	0	695950	0	0	7326900	10994000
224	576	AELTLGLR	8	0	871.513	138.9			1		2		0	0	64047	0	246250	0
225	1388	AEMADQAAAWLTR	13	0	1432.68	134.57					1		0	0	0	0	188700	0
226	603	AEMDAAIASCK	11	0	1165.51	110.15		1		1			0	14095	0	73573	0	0
227	476;595;1533	AEMEDLVSSK	10	0	1107.51	142.81	1	1	1	1	2	2	3372800	33955	116320	3376400	12787000	21624000
228	362	AEMEVLLASK	10	0	1089.57	100.06					1		0	0	0	0	0	0
229	1545	AENQPIR	7	0	826.43	129.2		1		1			0	60811	0	32947	0	0
230	984	AENQVLAMR	9	0	1030.52	129.28		2	1	1	2	1	0	253060	172240	11956	818980	501080
231	917	AENSQLTER	9	0	1046.5	146.75		1	1				0	0	17975	0	0	0
232	143	AENSSLNLIGK	11	0	1144.61	85.333		1					0	153370	0	0	0	0
233	1507	AENYDIPSADR	11	0	1249.56	122.64	1	1	1		1	1	173350	121920	244220	0	236000	889980
234	378	AEPASVAAESLAGSR	15	0	1414.71	131.13		1	1	1			0	52144	12248	82107	0	0
235	220	AEPLETFPFDQSK	13	0	1507.72	124.18					1	1	0	0	0	0	685530	134910
236	1460	AEPLQPDPGAAEDAAAQAVETPGWK	25	0	2518.2	95.496	1	1	1	1			416400	170940	108460	235240	0	0
237	1413	AEPVEVVAPR	10	0	1065.58	95.621						1	0	0	0	0	0	0
238	1289	AEQESLEFGK	10	0	1136.54	91.228	1	2		2	1	1	49411	82536	0	150100	69614	260220
239	933	AEQVALSR	8	0	872.472	86.383		1	1	1			0	61635	26089	23109	0	0
240	972	AEQWNVNYVETSAK	14	0	1637.77	141.34					1		0	0	0	0	64240	0
241	766	AESAPLPVSADDTPEVLNR	19	0	1979.98	146.79		1		1		1	0	29697	0	91595	0	159550
242	403	AESEEGPDVLR	11	0	1200.56	110.99		1			1		0	148090	0	0	53783	0
243	402	AETEEGPDVLR	11	0	1214.58	113.2	1	1			1	1	7223.2	72028	0	0	36745	181110
244	110	AETLEFNDVYQEVK	14	0	1683.8	176.83	1	3	1	1	1	1	37085	345240	219070	146070	67373	287780
245	1183	AETVQAALEEAQR	13	0	1414.71	174.25		1	1		1	1	0	49152	9735.3	0	118310	339230
247	903	AEVLSEEPILK	11	0	1226.68	140.65				1	1	1	0	0	0	4578.8	230170	326780
248	1247	AEVQVLVLDGR	11	0	1197.67	84.89			1			1	0	0	52331	0	0	218340
249	259;960	AEVSELK	7	0	774.412	107.62	1	2	2	2	1	1	335540	1220100	125000	439420	229460	393090
250	1463	AEVSPMYGVQK	11	0	1207.59	109.35		1				1	0	106580	0	0	0	143600
251	604	AFAAGADIK	9	0	862.455	97.752		1	2	2	1	1	0	41070	96210	37819	814280	866600
252	1394	AFASPVENPDNYCFCTEK	18	0	2147.89	157.15						1	0	0	0	0	0	115250
253	1147	AFCAENLEEK	10	0	1209.53	140.48		1			1		0	88648	0	0	203200	0
254	362	AFCGFEDPR	9	0	1097.46	82.877					1		0	0	0	0	179290	0
255	125	AFEDEMSGR	9	0	1040.42	126.82		1			1	1	0	113420	0	0	191430	190230
256	553	AFEEAEK	7	0	822.376	103.82	1	1		1			8846.4	190990	0	74184	0	0
257	1498	AFFPCFDTPAVK	12	0	1398.66	113.94				1	1	1	0	0	0	18256	112910	12816
258	1205	AFFSEVER	8	0	983.471	116.22		1			2		0	6030	0	0	274320	0
259	896	AFGPGLEGGLVNK	13	0	1257.67	149.98					1	1	0	0	0	0	2548800	1688300
260	1234	AFGPGLQGGSAGSPAR	16	0	1428.71	229.56	1	1	1	1	2	4	1984600	316670	605970	667440	33604000	40158000
261	877	AFITNIPFDVK	11	0	1263.69	77.724					1		0	0	0	0	99933	0
262	196	AFLADPSAFVAAAPVAAATTAAPAAAAAPAK	31	0	2751.46	168.44					1		0	0	0	0	322820	0
263	1101	AFLASGPYLTHQQK	14	0	1559.81	181.43					1		0	0	0	0	725890	0
264	1043	AFLASPEYVNLPINGNGK	18	0	1902.98	180.2					1		0	0	0	0	182990	0
265	1597	AFNRQAHHTDK	11	1	1323.64	103.22					1		0	0	0	0	149340	0
266	61	AFSDPFVEAEK	11	0	1238.58	123.24					1	1	0	0	0	0	469540	175000
267	991	AFSPTTVNTGR	11	0	1149.58	134.36	1	1			1	1	0	518390	0	0	374900	649810
268	100	AFVNCDENSR	10	0	1210.5	262.58		1		1			0	696320	0	124020	0	0
269	565	AFYMEEGVPYCER	13	0	1649.69	103.55					2		0	0	0	0	488660	0
270	52	AGAAGTAEATAR	12	0	1045.52	138.14	2	1	2	2	1	1	94370	23588	10920	160170	221930	427500
271	318	AGAGALLR	8	0	727.434	100.98	1		1			1	12823	0	5050.1	0	0	66269
272	1118	AGAGSATLSMAYAGAR	16	0	1453.7	108.36			1	1		1	0	0	47406	48131	0	481110
273	1010	AGAHLQGGAK	10	0	908.483	133.35	1	1	1	1	1	1	204670	304890	290570	295920	5444200	3934500
274	196	AGAIAPCEVTVPAQNTGLGPEK	22	0	2179.09	194.63	2	2	2	2	2	1	572590	231000	117970	1485200	1746500	313320
276	1204	AGALQCSPSDAYTK	14	0	1467.67	186.68	1	1	1	1	1	1	702720	514280	140100	272460	289650	644300
277	879	AGAYDFPSPEWDTVTPEAK	19	0	2079.94	180.04					1	1	0	0	0	0	298660	24990
278	1409	AGCQVVAPSDMMDGR	15	0	1592.67	106.2				1			0	0	0	114790	0	0
279	1153	AGDEFVEK	8	0	893.413	159.58	1	1	1	1	1	1	32995	224010	37441	240710	54446	217730
280	1538	AGDTVIPLYIPQCGECK	17	0	1919.91	160.38					1	1	0	0	0	0	291550	334500
281	321	AGELTEDEVER	11	0	1246.57	195.8	1	2	1	1	1	1	6950.5	2663100	74416	336540	1162900	882850
282	1092	AGESVELFGK	10	0	1035.52	98.831	1		1		1		43229	0	45292	0	10101	0
284	713	AGFAGDQIPK	10	0	1002.51	139.12		2	1		1	1	0	532280	163020	0	219800	373150
285	583	AGFFGDAMK	9	0	942.427	86.423					1	1	0	0	0	0	286400	214160
286	1204	AGFLDLK	7	0	762.428	113.12					1	1	0	0	0	0	176430	113280
287	645	AGGAGVPAFYTPTGYGTLVQEGGSPIK	27	0	2594.3	118.96					1		0	0	0	0	127830	0
288	61	AGGIETIANEYSDR	14	0	1494.7	168.45					1	1	0	0	0	0	203620	78245
289	222	AGGPATPLSPTR	12	0	1123.6	116.24		1	1		2	1	0	313670	330160	0	137170	0
290	1234;1106	AGGPGLER	8	0	755.393	141.93	1	2	1	1	1	1	1969300	858040	16332	17391	1581100	5618800
291	980	AGGPTTPLSPTR	12	0	1153.61	158.45	1	1	1	1			0	11613	994150	181440	0	0
292	521	AGGSAALSPSK	11	0	944.493	99.483	1	1	1	1			28318	44830	107620	34606	0	0
293	914	AGIIASAR	8	0	757.445	84.244			1				0	0	72539	0	0	0
294	288	AGIPVYAWK	9	0	1003.55	105.03	1		1		1	1	28113	0	16622	0	387560	283190
295	1452;986	AGITTIEAVK	10	0	1001.58	117.91	1	2	1	1	2	1	1836200	1609100	1525600	2270800	1172600	0
296	1057	AGLGHPAAFGR	11	0	1052.55	86.247						1	0	0	0	0	0	1410500
297	1038	AGLNCSTENMPIK	13	0	1433.66	117.1	1	1	2	1		1	61712	182030	267140	203390	0	14514
298	259	AGLNSLEAVK	10	0	1000.56	167.76	1	2	1	2	1	1	2291900	9895.3	6386.3	23190	463290	1099200
299	788;424	AGLQFPVGR	9	0	943.524	147.57	1	1	1	1	2	2	72950	395280	601340	58481	1443900	49322000
300	279	AGLQVYNK	8	0	891.481	168.36	2	2	3	3	1	1	129180	219060	132550	245590	474930	938660
301	583	AGLSSGFIGCVR	12	0	1222.61	114.94					1		0	0	0	0	74464	0
302	328	AGLTDLQR	8	0	872.472	97.208	1	1	1	1			68248	36227	18874	44648	0	0
303	1037	AGMSAEQAQGLLEK	14	0	1431.7	281.94					1	1	0	0	0	0	1338700	1056200
304	1465	AGMTHIVR	8	0	883.47	103.99					1		0	0	0	0	96808	0
305	732	AGNFYVPAEPK	11	0	1191.59	102.49					1	1	0	0	0	0	2619200	2748000
306	1017	AGNLGGGVVTIER	13	0	1241.67	124.37	1			1	1	2	20098	0	0	12213	2381100	1235600
307	1183	AGNSLAASTAEETAGSAQGR	20	0	1847.86	199.36	1			1	1	1	51029	0	0	23441	135250	401900
308	865	AGPAAAFR	8	0	759.403	117.07	1	1	2	1			43813	148470	7836.5	52606	0	0
309	808	AGPESDAQYQFTGIK	15	0	1610.76	244.61		1	1	1	1	2	0	376070	133450	105070	776580	867450
310	1106	AGPGTLSVTIEGPSK	15	0	1412.75	135.6		1				1	0	31779	0	0	0	224010
311	418;292	AGPIWDLR	8	0	926.497	117.82					1	1	0	0	0	0	310550	33587
312	1030	AGQAVDDFIEK	11	0	1191.58	176.49	1	1	1	1	1	1	113450	307410	174550	35946	7744.7	190750
313	1234	AGQSAAGAAPGGGVDTR	17	0	1441.69	209.17	1	1		1	2	2	1239500	283050	0	521210	2930900	4190800
314	847	AGSPTLLNCLMYK	13	0	1466.73	141.28					1		0	0	0	0	101760	0
315	1602	AGSSSLEAVR	10	0	975.499	135.99		1	2	1		1	0	308430	13044	130440	0	279580
316	330	AGTQIENIDEDFR	13	0	1506.7	224.43	1	1		1	2	2	13457	144140	0	24005	3232300	1349000
317	1542	AGTQIENIEEDFR	13	0	1520.71	184					2	2	0	0	0	0	6052900	81751
318	1234	AGVAPLQVK	9	0	881.533	155.74	1	1	2	2	1	1	1151600	535950	464620	1106000	3484600	0
319	1606	AGVDPLVPLR	10	0	1035.61	86.343					1	1	0	0	0	0	134020	158330
320	73	AGVEAMSK	8	0	791.385	87.116	1		1				155620	0	22570	0	0	0
321	1577	AGVETTKPSK	10	1	1016.55	136.34	2	1	1	2	1	1	145860	209060	37120	114700	161730	360280
322	1592;853;1623	AGVETTTPSK	10	0	989.503	157.79	2	1	2	1	1	1	6313700	6255200	1272900	5201400	1122800	3059700
323	482	AGVFSDLSNQELK	13	0	1406.7	126.5	1				1		18954	0	0	0	362520	0
324	794;1080	AGVIFPVGR	9	0	914.534	122.04					1		0	0	0	0	314280	0
325	64;639;300	AGVLAGHDNR	10	0	1008.51	220.39					1	1	0	0	0	0	1006100	127200
326	1216	AGVNTVTTLVENK	13	0	1344.72	224.54	1	1	1	2	3	2	83999	458170	551320	204720	3387100	4390100
327	1321	AGVSVYGIVK	10	0	991.57	90.329						1	0	0	0	0	0	0
328	1565	AGVVTPGITEDQLWR	15	0	1640.85	120.4					1		0	0	0	0	192060	0
329	1545	AGYPQYVSEILEK	13	0	1495.76	93.221					1		0	0	0	0	0	0
330	1272	AGYQSTLTR	9	0	995.504	144.83	1	2	2			1	347180	895270	120910	0	0	3110800
331	1204	AHATGAGPAGR	11	0	964.484	108					1	1	0	0	0	0	106860	51614
332	891	AHATTSNTVSK	11	0	1115.56	131.09		1	1	1		1	0	94986	20099	133310	0	342930
333	293	AHENEITK	8	0	940.461	140.12	1	1	1	1	1	1	37880	47321	10673	201360	3045300	2214700
334	583	AHSSAGQQVAR	11	0	1110.55	124.97		1	1	1	1	1	0	24431	7036.1	14630	35620	77547
335	868	AHSSMVGVNLPQK	13	0	1366.7	187.32					2	2	0	0	0	0	1502000	989320
336	1197	AHYGGFTVQNEANK	14	0	1534.72	166.25					1		0	0	0	0	224760	0
337	1204	AIADMLR	7	0	788.421	99.789					1	1	0	0	0	0	265700	222850
338	1236	AIADTGANVVVTGGK	15	0	1371.74	256.52	1	1	1	1	1	2	266300	315320	370010	368010	292140	493120
339	1212	AIDCLEDEK	9	0	1091.48	204.3					1	1	0	0	0	0	374050	1483600
340	1135	AIDGINQR	8	0	885.467	129.07		2	1				0	1222300	16386	0	0	0
341	1152	AIDTTQLFSLPK	12	0	1332.73	143.96					1	1	0	0	0	0	168080	18437
342	1546	AIEASNAYSR	10	0	1080.52	154.49						1	0	0	0	0	0	109670
343	775	AIEINPDSAQPYK	13	0	1444.72	121.15		1	1	1	2	3	0	427640	451470	638250	469190	763440
344	249	AIGLPEELIQK	11	0	1209.7	118.27					2	1	0	0	0	0	15586000	6087200
345	223;1292	AIGVLTSGGDAQGMNAAVR	19	0	1786.9	118.61						1	0	0	0	0	0	93120
346	1098	AIGYATAADCGR	12	0	1224.56	134.86		1			1	1	0	147620	0	0	342880	416170
347	1448	AIGYLNTGYQR	11	0	1254.64	114.96					1	1	0	0	0	0	686040	419270
348	1015	AILPCQDTPSVK	12	0	1327.68	122.26					1	1	0	0	0	0	550800	791460
349	870	AINIADELPR	10	0	1110.6	107.27						1	0	0	0	0	0	0
350	463	AIPVTQYLK	9	0	1031.6	87.106					1	1	0	0	0	0	77320	102230
351	876	AIQLSGAEQLEALK	14	0	1469.81	140.14						1	0	0	0	0	0	96859
352	242	AISESGVALTSVLVK	15	0	1472.85	161.15					1		0	0	0	0	273250	0
353	1264	AITGASLADIMAK	13	0	1260.67	173.74					1	2	0	0	0	0	1070900	181040
354	389	AITIAGVPQSVTECVK	16	0	1671.89	202.96		2	1	1	1	1	0	192640	255170	81095	846350	945010
355	1103	AITIANQTNCPLYITK	16	0	1819.95	273.18					1		0	0	0	0	1151500	0
356	707	AITIASQTNCPLYVTK	16	0	1778.92	147.94					1	1	0	0	0	0	41312	504890
357	352	AIVAGDQNVEYK	12	0	1305.66	131.41	1	1		1		1	4007200	146880	0	1259900	0	60943
358	1378	AIVAIENPADVSVISSR	17	0	1739.94	124.31					1	2	0	0	0	0	327870	217460
359	1234;896;1106	AIVDGNLK	8	0	828.471	88.712			1	1	1	1	0	0	18079	50116	2236000	2940200
360	913	AIYDTPCIQAESEK	14	0	1623.74	156.7		1	1	1	1	2	0	99706	95744	147190	77411	118790
361	125	AKDEQSAVSMLK	12	1	1305.66	119.38					1	1	0	0	0	0	108290	116360
362	1401;1326	AKPAEAPAAAAPK	13	1	1191.66	80.311	1	1	1	1			4093.9	35875	9414.7	20429	0	0
363	967;968;969	ALAAAGYDVEK	11	0	1106.56	139.39	2	3	2	1	2	5	1453700	18311000	14748000	17684000	34700000	25083000
364	1467	ALAAGGVGSIVR	12	0	1069.62	157.69		1	1		1	2	0	69932	134040	0	1190600	969930
365	970	ALAAGGYDVEK	11	0	1092.55	162.87	1	2	1	1	1	1	493810	10037000	7314800	2182000	2589200	722290
366	1183	ALAEGGSILSR	11	0	1072.59	117.08		1			1	2	0	66094	0	0	715930	857490
367	256	ALAEGVLLR	9	0	940.571	128.36		1			1		0	10847	0	0	169620	0
368	1535	ALAGCDFLTISPK	13	0	1391.71	218.37		1			2	1	0	10142	0	0	1863700	81144
369	1433	ALANSLACQGK	11	0	1131.57	209.29	1	2	2	2	1	1	3125700	3951300	3351100	2647100	2626400	3054400
370	1120	ALASIDSK	8	0	803.439	117.24		1	1				0	550970	12489	0	0	0
371	392	ALASLMTYK	9	0	996.531	206.11					1	1	0	0	0	0	898140	371710
372	1120	ALASQLQDSLK	11	0	1172.64	154.93	1		1	1	3	2	264840	0	158590	72140	2704900	3165300
373	1204	ALAVNPR	7	0	739.434	131.26	1		1		1	1	113140	0	57035	0	280190	529820
374	1578	ALCAEADR	8	0	904.407	113.31	1	1	1	1	1	1	25136	166690	42151	110420	37818	503760
375	671	ALCDNVDTR	9	0	1062.48	137.36		1	1	1			0	116940	9135	33376	0	0
376	1137	ALCSGSPAER	10	0	1046.48	77.366			1				0	0	43983	0	0	0
377	656	ALDDFVLGSAR	11	0	1162.6	127.11					1		0	0	0	0	129290	0
378	1117	ALDDMISTLK	10	0	1105.57	96.581	1				1	1	54605	0	0	0	739690	1444700
379	980	ALDDTAR	7	0	760.372	90.034	1	1	1	1			22959	247720	29251	71567	0	0
380	476;595;1533	ALDEETR	7	0	832.393	115.32	2	1	1	1	1	1	2136900	221430	6076.8	755350	454440	1062000
381	1542;330	ALDFIASK	8	0	863.475	135.12		1			1	1	0	143540	0	0	2512400	1698900
382	1204	ALDGAFTEENR	11	0	1221.56	165.18			1	1	1	1	0	0	3833.3	5431.8	525060	546270
383	575	ALDGPEQMELEEGK	14	0	1544.7	99.569	1		1	1		1	96322	0	9000.6	91951	0	77284
384	288	ALDIAENEMPGLMR	14	0	1558.75	169.93					1		0	0	0	0	114330	0
385	336	ALDLDSSCK	9	0	1007.46	89.477	1	2	2	1		2	2536.7	187270	62346	50698	0	380620
386	535	ALDLINK	7	0	785.465	94.314					1	1	0	0	0	0	63446	385700
387	72	ALDLLDK	7	0	786.449	87.703						1	0	0	0	0	0	0
388	194	ALDTMNFDVIK	11	0	1265.63	197.13					1		0	0	0	0	417210	0
391	958	ALEDLAQELEK	11	0	1257.65	105.75		1	1		1		0	8208.8	9079.4	0	149570	0
392	476;595;1533	ALEEALEAK	9	0	972.513	153.96	1	1		2	1	2	466810	1093700	0	356450	19865000	20285000
393	1305	ALEEEQEAR	9	0	1073.5	199.67		1	1	1			0	372090	34792	129510	0	0
394	995	ALEENNNFSK	10	0	1164.54	156.5		1	1				0	232590	121300	0	0	0
395	815	ALEFVAR	7	0	804.449	124.99				1	1	1	0	0	0	16192	1232400	751890
396	476;595;1533	ALELDPNLYR	10	0	1202.63	131.49					1	2	0	0	0	0	1844000	20181
397	449	ALELDSNLYR	10	0	1192.61	147.5					2	2	0	0	0	0	1266300	291730
398	1009	ALELDSNNEK	10	0	1131.54	95.215		1		1			0	220850	0	126770	0	0
399	1025	ALELEQER	8	0	986.503	109.61		3	1	1	1	2	0	1168300	6868.7	162870	1639200	1240200
400	1411	ALELTGLK	8	0	843.507	137.16		1			1	1	0	25081	0	0	699100	518740
401	771	ALENDPDCK	9	0	1060.45	103.68	1	2	1	2			17713	44751	9042	58716	0	0
402	253;955	ALENDPDCR	9	0	1088.46	113.52	1	1	1	1			73515	775460	103320	266500	0	0
403	449	ALEQQVEEMK	10	0	1203.58	179.62	1	2	2	1	2	1	171310	2366300	984050	343510	2192800	4946800
404	217	ALESGDVNTVWK	12	0	1317.66	149.38	1		1	1	1	3	281080	0	46261	25520	716030	973200
405	108	ALETNTHVK	9	0	1011.53	123.57						1	0	0	0	0	0	68714
406	476;595;1533	ALETQMEEMK	10	0	1208.54	167.47	1	1		1	1	2	502910	23299	0	104510	15062000	25219000
407	583	ALEVEECR	8	0	1004.46	137.47				1	1	2	0	0	0	4758.7	333110	467610
408	1204	ALGDLISATK	10	0	987.56	193.88					1	2	0	0	0	0	1147300	2501700
409	359	ALGGVNAAR	9	0	827.461	97.151					1	1	0	0	0	0	295860	584040
410	1302	ALGQNPTNAEVLK	13	0	1353.73	187.71	1	2	1	1	1	2	8082700	7552300	5346900	11814000	65758000	75419000
411	164	ALIDQEVK	8	0	914.507	101.74		1	1	1	1	1	0	512480	77354	926240	141340	237690
412	506	ALIDSVIPK	9	0	954.575	120.75					1	1	0	0	0	0	94708	89790
413	296	ALIGATNPADAPPGTIR	17	0	1633.88	132.98					1	1	0	0	0	0	106970	209000
414	1120	ALIQCAK	7	0	802.437	88.649				1	1	1	0	0	0	8752.8	427390	845570
415	54	ALLALCGGED	10	0	1017.48	100.32		1			1	2	0	13839	0	0	170640	95217
416	582	ALLEVVQSGGK	11	0	1099.62	99.128		1			1	2	0	15308	0	0	342230	411240
417	1291	ALLLLCGEDD	10	0	1117.53	82.999		1	1		1		0	16434	9261.7	0	241510	0
418	1275	ALLNVVDNAR	10	0	1083.6	162.65					1	1	0	0	0	0	116520	49666
419	1053	ALLQAQQA	8	0	841.466	104.28				1	1	1	0	0	0	43217	94576	169390
420	1383	ALLQNNTLTELR	12	0	1384.77	125.89					1		0	0	0	0	577700	0
421	1205	ALLQSSASR	9	0	931.509	115.1		1			1	1	0	271620	0	0	418860	502290
422	394	ALLTPVAIAAGR	12	0	1151.7	165.82					1	1	0	0	0	0	868250	157850
423	187	ALLVTASQCQQPAENK	16	0	1756.88	188.99					1		0	0	0	0	169570	0
424	1419	ALLYLCGGDD	10	0	1095.49	94.399					1	1	0	0	0	0	444270	50459
425	868	ALMDEVVK	8	0	903.474	138.33	1	2	1	1	1	2	15585	2124900	272400	39327	2255200	3643000
426	778	ALNEGGFQSIPK	12	0	1259.65	147.02		1	1		1	1	0	9164.6	5142	0	184500	213670
427	1127	ALNEITESGR	10	0	1088.55	104.97		2	1				0	2457700	91880	0	0	0
428	1509	ALNQGTR	7	0	758.404	103.11	1		1				10957	0	7303.1	0	0	0
429	597	ALNVEPDGTGLTCSLAPNIISQL	23	0	2382.21	107.36					1	1	0	0	0	0	263850	274750
430	1507	ALPAVQQNNLDEDLIR	16	0	1807.94	256.72	1				1		64119	0	0	0	607590	0
431	1558;1480	ALPELTK	7	0	770.454	125.53	1	1		1			510610	934220	0	628200	0	0
432	1259	ALQAAYGASAPSVTSAALR	19	0	1803.95	161.85	1			1	1	1	26938	0	0	39758	407070	383700
433	362	ALQALEELR	9	0	1041.58	95.496					1		0	0	0	0	0	0
434	1433	ALQASALK	8	0	800.476	139.89	2	2	4	3	3	4	1393900	3931500	2365300	1522100	1957100	3758500
435	1589	ALQATVGNSYK	11	0	1150.6	156.16		2	1	1	1	2	0	1252300	656750	336590	889290	1247900
436	27	ALQDLGLR	8	0	884.508	84.481						1	0	0	0	0	0	134410
437	1137	ALQEALVLSDR	11	0	1213.67	87.568				1	1		0	0	0	9382	52647	0
438	1436	ALQELQAAQAR	11	0	1197.65	186.98		1			1	1	0	34242	0	0	267680	877000
439	681	ALQFLEEVK	9	0	1075.59	126.73					1		0	0	0	0	242510	0
440	140	ALQQVQEK	8	0	942.513	99.912		1	1	1			0	44764	14039	48091	0	0
441	217	ALQSPALGLR	10	0	1024.6	95.499					2	2	0	0	0	0	290150	333000
442	81	ALSDADVQK	9	0	945.477	78.139		1	1				0	127870	34315	0	0	0
443	1185	ALSIGFETCR	10	0	1152.56	102.11					1		0	0	0	0	120520	0
444	1209	ALSQLAEVEEK	11	0	1215.63	257.77			1		1	1	0	0	8519.7	0	1098800	710040
445	65	ALSSQHQAR	9	0	996.51	130.53	1	1	1	1	2	2	15693	19940	20907	13747	535800	211860
446	1204	ALSTDPAAPNLK	12	0	1196.64	154.98	1	2			2	2	1166900	482490	0	0	919440	2916600
447	519	ALTDMPQMR	9	0	1061.5	106.29		1	1		1	1	0	392770	510080	0	893600	1423400
448	1006	ALTGHLEEVVLALLK	15	0	1604.95	117.66		1	1	1			0	23151	6797.3	11022	0	0
449	820	ALTLIAGSPLK	11	0	1082.67	126.31					1		0	0	0	0	166890	0
450	830	ALTQPLGLLR	10	0	1080.67	95.815					1	1	0	0	0	0	1122000	69824
451	1234	ALTQTGGPHVK	11	0	1107.6	123.16	1	1			1	1	133730	23128	0	0	1193000	3777900
452	627	ALTSEIALLQSR	12	0	1300.74	166.17					1		0	0	0	0	0	0
453	1025	ALTSELANAR	10	0	1044.56	181.6	1	2	1	1	1	2	91449	977810	270130	37934	533000	1337100
454	125	ALVADSHPESER	12	0	1309.63	129.75		1			1	1	0	16378	0	0	192820	227100
455	1485	ALVDGPCTQVR	11	0	1214.61	179.89	1	1		1	1	1	35306	380450	0	384890	1400500	966190
456	115	ALVDTYCR	8	0	996.47	108.92		1				1	0	58880	0	0	0	123870
457	1032	ALVFQPVAELK	11	0	1213.71	84.77					1		0	0	0	0	0	0
458	521	ALVQNDTLLQVK	12	0	1340.77	111.33			1		1	1	0	0	67128	0	151970	520380
459	1244	ALVQQMEQLR	10	0	1214.64	119.37			1	1	1		0	0	30657	150810	47472	0
460	817	ALWEDEGVR	9	0	1073.51	88.843	1				1	1	17418	0	0	0	148290	62521
461	1006	ALYEAGER	8	0	907.44	105.3		1	1		2	1	0	720490	33209	0	1526000	604070
462	222	ALYESELADAR	11	0	1236.6	113						1	0	0	0	0	0	0
463	980	ALYETELADAR	11	0	1250.61	175.81			1		1	1	0	0	8084.4	0	1369800	767910
464	1039	AMAAEAEASR	10	0	1005.45	132.33	3	3	2	3	2	3	278720	578400	46079	144990	668050	1150100
465	213	AMADELSEK	9	0	992.448	115.66	1	2	1	2	1	1	198150	164170	33487	277830	214780	624360
466	336	AMADPEVQQIMSDPAMR	17	0	1888.85	96.329						1	0	0	0	0	0	137260
467	1361	AMDTLGIEYGDK	12	0	1311.6	108.51		1				1	0	186360	0	0	0	95899
468	917	AMEALATAEQACK	13	0	1392.64	207.48	1	1	2	1	1	2	40946	195440	135100	377380	316530	426710
469	1416	AMEAVAAQGK	10	0	974.486	106.25	1	2	2	1	1	2	769860	1491500	626120	1766600	772320	1805900
470	54	AMEGAGTDEK	10	0	1007.42	128.33	1	1	1	1			31423	67859	15383	55308	0	0
471	782	AMFEQMR	7	0	911.399	97.768					1	1	0	0	0	0	198210	334370
472	1476	AMISGLSGR	9	0	890.464	76.819						1	0	0	0	0	0	285350
473	1125	AMMYSGELK	9	0	1028.47	109.32		1					0	35302	0	0	0	0
474	584	AMNGESLDGR	10	0	1048.46	122.48		1		1			0	332420	0	114690	0	0
475	178	AMQDAEVSK	9	0	977.449	122.17	1	1	1	1			24199	324670	156400	168800	0	0
476	123	AMQEQLENYDFTK	13	0	1615.72	129.98					1	1	0	0	0	0	20056	85856
477	55	AMQGAGTQER	10	0	1047.48	146.39	1	2	1	2		1	20309	58859	16653	70789	0	45603
478	822	AMQQQVQK	8	0	959.486	169.88	2	1	2	1			84196	72833	30595	23412	0	0
479	1117	AMTGVEQWPYR	11	0	1336.62	134.78					1	1	0	0	0	0	197750	62322
480	878	AMVASGSELGK	11	0	1048.52	83.156		1	1	1			0	825390	188030	500180	0	0
481	763	AMVDPAQTVEQR	12	0	1343.65	139.02			1	1	1	1	0	0	59987	145140	142030	298450
482	1006	AMVSEFLK	8	0	923.479	126.13			1		1	1	0	0	0	0	354030	224320
483	893	ANACNSVIK	9	0	975.481	80.891		1					0	129590	0	0	0	0
484	666	ANAQAAALYK	10	0	1019.54	193.93	1	3	3	2	1	2	277550	2850900	1848000	543550	219910	693800
485	1321	ANEAYPCPCDIGHR	14	0	1658.69	99.912	1			1			40043	0	0	180490	0	0
486	1236	ANEVISK	7	0	759.413	93.688	1	1	1	1			12651	73833	196180	305410	0	0
487	1422	ANFSLPEK	8	0	904.465	106.07		1			1	1	0	197800	0	0	110300	170170
488	388	ANINIEK	7	0	800.439	134.67	1		1	1	1	2	16267	0	90584	150220	34768	564760
489	114	ANLEIMTK	8	0	918.484	109.2		2	2	1	1	2	0	167400	100050	70389	350990	460940
490	1456	ANLNALDR	8	0	885.467	122.51	1		1		1	1	2125.2	0	17786	0	2429300	0
491	1234	ANLPQSFQVDTSK	13	0	1433.72	169.49	1	1	1	1		1	15160000	493250	654950	2501600	0	330620
492	449	ANLQIDQINTDLNLER	16	0	1868.96	299.04		1			1	1	0	45584	0	0	415640	770980
493	151	ANNLSSLSK	9	0	932.493	116.89	1		1	1			98850	0	113150	180070	0	0
494	1026	ANPDLPILIR	10	0	1120.66	83.924					1	1	0	0	0	0	522580	132250
495	1577	ANPTVTLFPPSSEELQANK	19	0	2042.03	193.84		1	1	1	4	1	0	109370	48934	82463	1165500	2942300
496	339	ANSSATETINK	11	0	1134.55	105.84		1		1			0	44019	0	51670	0	0
497	1118	ANTFVAELK	9	0	991.534	157.84		2			1	1	0	168830	0	0	855810	327420
498	983	ANTVQEATFQMELPK	15	0	1705.83	141.7					1		0	0	0	0	127710	0
499	509	ANVDISAPK	9	0	913.487	98.082	1	1	1	1	1	2	0	50176	32778	89966	119040	478450
500	265	ANYDVLESQK	10	0	1165.56	100.43		1					0	101280	0	0	0	0
501	314	APAPASAPPGPSEELLR	17	0	1658.86	135.68					1	1	0	0	0	0	254870	1119100
502	806	APASVLPAATPR	12	0	1149.65	86.733		1			1	1	0	24906	0	0	95339	520670
503	1285	APDMDQLVLPSK	12	0	1312.67	121.23					1	1	0	0	0	0	219610	89964
504	383	APEEPNIQVNPLGIPVNSK	19	0	2015.07	157.42						2	0	0	0	0	0	669950
505	72	APEIMLNSK	9	0	1001.52	102.27		1		1		1	0	105580	0	64538	0	288700
506	1386	APFDLFENK	9	0	1079.53	130.63			1		1	1	0	0	6453.5	0	786720	53855
507	1079	APGAEEYAQQDVLK	14	0	1517.74	156.7				1	1	1	0	0	0	0	76416	957370
508	1279	APGDQAWTQALPSVIK	16	0	1680.88	121.25					1	1	0	0	0	0	118750	63050
509	1551	APGFGDNR	8	0	832.383	121.42	1	1	2	1			38707	494710	238600	106810	0	0
510	1406	APGIIPR	7	0	722.444	104.9		1	1	1			0	95095	54225	96864	0	0
511	1453	APIIAVTR	8	0	839.523	174.88		1	1	2	1	2	0	354740	133570	174180	844310	1600500
512	1518;410	APILIATDVASR	12	0	1225.7	142.47					1	1	0	0	0	0	468180	175350
513	205	APLALER	7	0	768.449	136.75					1	1	0	0	0	0	113460	368910
514	1455	APLDIPVPDPVK	12	0	1259.71	152.91		1	1		2	1	0	41208	64883	0	2043900	397740
515	1106	APLNVQFNSPLPGDAVK	17	0	1765.94	141.38		1	1	1	1	1	0	26170	20740	43819	108690	300300
516	896	APLQVAVLGPTGVAEPVEVR	20	0	2001.13	129.3					2		0	0	0	0	781770	0
517	547	APNHAVVTR	9	0	963.525	127.64	2	1	1	1	1	1	40045	21625	6874.5	25625	156040	3312100
518	509	APNISMPDVDLNLK	14	0	1525.78	93.776			1		1		0	0	14179	0	165870	0
519	80	APNVVVTR	8	0	854.497	121.77		2	3	1	1	1	0	1087000	1071700	335360	283010	765370
520	948	APPHELTEEEK	11	0	1278.61	87.629					1	1	0	0	0	0	62674	39321
521	576	APPTLLSTSSGGK	13	0	1214.65	156.11	1				2	1	376610	0	0	0	763290	1119400
522	1454	APQCLGK	7	0	772.39	100.08	1	1	1	1			55819	159520	207190	57117	0	0
523	1544	APQVDVDK	8	0	870.445	123.31	2	2	1	2		1	65651	1475400	23375	546430	0	22154
524	278	APSDLYQIILK	11	0	1259.71	93.204					1		0	0	0	0	115880	0
525	1234	APSVANVGSHCDLSLK	16	0	1653.81	254.46					2	2	0	0	0	0	7097800	13136000
526	1106	APSVATVGSICDLNLK	16	0	1643.86	172.42			1			1	0	0	24996	0	0	419660
527	878	APSVPAAEPEYPK	13	0	1354.68	128.64	1	1	1	1			0	308690	219110	353220	0	0
528	744	APTAQVESFR	10	0	1104.56	133.28		1			1	2	0	74540	0	0	560160	367610
529	563	APTCGLCEVAR	11	0	1232.56	120.76		1			1	1	0	80600	0	0	252090	35775
530	1028	APVAGTCYQAEWDDYVPK	18	0	2068.92	273.51	1				1		37849	0	0	0	1324600	0
531	671	APVDITGQFEK	11	0	1203.61	92.103						1	0	0	0	0	0	149540
532	362	APVPASELLASGVLSR	16	0	1565.88	118.95					1		0	0	0	0	235360	0
533	483	APVPTGEVYFADSFDR	16	0	1769.83	155.61					1		0	0	0	0	661190	0
534	1441	APWIEQEGPEYWDQETR	17	0	2132.94	236.84					1		0	0	0	0	240850	0
535	791	AQAAAPASVPAQAPK	15	0	1376.74	139.45	1	1	1	1			123000	203590	96648	123230	0	0
536	362	AQAEAQQPTFDALR	14	0	1544.76	214.01		1			1	1	0	5913.6	0	0	472400	439820
537	1305	AQAELENVSGALNEAESK	18	0	1858.89	274.38		1	1	1	1		0	200570	113010	134620	60347	0
538	599	AQAELVGTADEATR	14	0	1430.7	118.3	1	1	1	1	1	1	175340	213440	136340	470800	814580	338930
539	362	AQAEQAALR	9	0	956.504	101.8	2	2	2	2	1	2	119000	216570	171530	129420	45886	54385
540	362	AQAEVEGLGK	10	0	1000.52	96.362	1						158530	0	0	0	0	0
541	1354	AQAVSEDAGGNEGR	14	0	1359.6	128.15		1		1			0	21610	0	37681	0	0
542	226	AQCGGGLLGVR	11	0	1086.56	87.584						1	0	0	0	0	0	61962
543	188	AQCPIVER	8	0	971.486	102.64	1	2	3	2	1	1	32477	1391500	502310	520260	619150	703020
544	153	AQDEAFALQDVPLSSVVR	18	0	1944	91.934					1		0	0	0	0	96580	0
545	1183	AQEAEQLLR	9	0	1056.56	105.84					1	1	0	0	0	0	243310	518660
546	1011	AQEILSQLPIK	11	0	1238.72	175.43					1	1	0	0	0	0	1093500	1307400
547	486	AQEVSEYLSQNPR	13	0	1519.73	93.766		1		1			0	79493	0	59032	0	0
548	604	AQFAQPEILIGTIPGAGGTQR	21	0	2124.13	170.26					2		0	0	0	0	734960	0
549	665	AQFLVEK	7	0	833.465	108.12	1	1	1	1	1		2740.7	41738	10134	16359	120920	0
550	1183	AQGIAQGAIR	10	0	983.551	128.15		1			1	1	0	16493	0	0	162150	263000
551	497	AQHEDQVEQYK	11	0	1373.62	148.07					1	1	0	0	0	0	393730	451880
552	474	AQIWDTAGQER	11	0	1273.61	180.88					1	1	0	0	0	0	1439400	635530
553	362	AQLEPVASPAK	11	0	1109.61	109.36				1	1		0	0	0	96791	118440	0
554	622	AQLGGPEAAK	10	0	940.498	107.42	1	1	1	1			1223200	208990	49346	603600	0	0
555	734	AQLLQPTLEINPR	13	0	1491.84	127.75					1		0	0	0	0	206810	0
556	362	AQLMADFQAGR	11	0	1206.58	100.41		1	1		2	1	0	36077	32767	0	155520	278480
557	1582	AQLMAEQEK	9	0	1046.51	136.48	1	1	1	1			22468	116680	22950	18681	0	0
558	519	AQLVDMK	7	0	803.421	108.32	2	3	2	2	2	3	814260	4981900	3512900	518550	598850	5718000
559	1190	AQMDLSGR	8	0	876.412	122.29		1	1	1			0	11372	15556	217220	0	0
560	1025	AQMVQEDLEK	10	0	1189.56	135.32	1	1	1	1			629180	283320	211970	530860	0	0
561	393	AQPAQPADEPAEK	13	0	1350.64	93.738		1	1	1			0	63655	5340.2	34751	0	0
562	1025	AQQELEEQTR	10	0	1230.58	205.6	1	3	2	3	1	1	60872	1266200	62117	499560	248460	349090
563	631	AQQEQELAADAFK	13	0	1447.69	204.45	1	1	1	2	1	1	41495	1078900	574470	361270	53885	352180
564	20	AQQLAEVEVK	10	0	1113.6	117.91	1	1			1	2	176330	89831	0	0	140980	410350
565	1423	AQQNLSWEEIAK	12	0	1415.7	134.05					1	1	0	0	0	0	107560	68387
566	1120	AQQVSQGLDVLTAK	14	0	1456.79	244.14	1			1	1	2	333160	0	0	165200	5681700	10316000
567	393	AQSELAAHQK	10	0	1081.55	96.865		1	1				0	17019	6883.7	0	0	0
568	882	AQSPTPSLPASWK	13	0	1368.7	104.35					1	1	0	0	0	0	369000	935410
569	125	AQTLPTSVVTITSESSPGK	19	0	1901.99	105.48			1				0	0	95436	0	0	0
570	650	AQVADVVVSR	10	0	1042.58	98.361		1					0	41039	0	0	0	0
571	362	AQVEQELTTLR	11	0	1286.68	85.462					1	2	0	0	0	0	404400	964350
572	1267	AQWNQLQQLDTR	12	0	1499.75	128.22	1	1	2	1	1	1	165820	253400	138550	146240	8671.3	122130
575	40	AQYESLAAK	9	0	979.497	80.987	1	1		1			3493.9	26398	0	328170	0	0
576	1426	AQYETIAAK	9	0	993.513	220.03	2	2	1	3	1	1	15187000	275570	8170.2	4158200	11228000	16890000
577	421	ASAELALGENSEVLK	15	0	1529.79	145.31					1	1	0	0	0	0	1020600	3792500
578	859	ASAETVDPASLWEY	14	0	1537.69	117.48	1	1			1	1	130580	433730	0	0	120840	281500
579	1204	ASAGPQPLLVQSCK	14	0	1454.76	266.4	1	2	1	1	1	1	1293100	613970	688810	0	508240	2161600
580	28	ASAGSYISALR	11	0	1094.57	127.16					1	1	0	0	0	0	297450	205690
581	884	ASAHAITGPPTELITSEVTAR	21	0	2121.11	144.07					1		0	0	0	0	257220	0
582	1395	ASANMDLMR	9	0	1007.45	96.047		2			2	1	0	249430	0	0	284400	320510
583	546	ASAPLPGLSAPGR	13	0	1192.66	143.55	1			1	1	1	895350	0	0	68562	1189500	3717200
584	157	ASASDGSSFVVAR	13	0	1252.6	178.04	1	1			1	1	2907.6	71434	0	0	438220	649250
585	1357	ASATSATLELDR	12	0	1233.62	113.49		1	1			1	0	19936	12548	0	0	123470
586	796	ASAVYQALQK	10	0	1077.58	84.325		1					0	0	0	0	0	0
587	1272	ASCCCSLGK	9	0	1041.4	85.959	1	1	1	1			47724	28823	14734	26232	0	0
588	1043	ASCLYGQLPK	10	0	1135.57	171.69	1	1				1	295880	11040	0	0	0	12156000
589	960	ASDAEGDVAALNR	13	0	1287.61	148.66	2	1				1	490260	85920	0	0	0	559470
590	1453	ASDVHEVR	8	0	911.446	132.95		1			1	1	0	22738	0	0	277650	230460
591	1490	ASEEHLK	7	0	812.403	97.369		1	1	1			0	24559	8425.9	7887.5	0	0
592	186	ASFNNPDR	8	0	919.415	87.433		1					0	72317	0	0	0	0
593	164	ASFPQGPIGGANR	13	0	1270.64	83.385					1	1	0	0	0	0	380450	411720
594	758	ASGAQLEAK	9	0	873.456	147.49	1	1	1	1	1		45207	484040	20532	20010	175700	0
595	760	ASGNLETK	8	0	818.413	83.648	1					1	0	0	0	0	0	0
596	896	ASGPGLER	8	0	785.403	128.22	2			1	1	1	1899900	0	0	8804.1	402770	178250
597	1234	ASGPGLNTTGVPASLPVEFTIDAK	24	0	2341.22	158.22					2		0	0	0	0	4786400	0
598	967;968;969	ASGPPVSELITK	12	0	1197.66	163.81	1	2	1	1	1	3	1237400	11509000	17663000	2228100	13080000	29175000
599	289	ASGVAVSDGVIK	12	0	1101.6	188.75	2	2	1	1	2	2	13195000	10858000	8709200	10305000	8241500	14761000
600	423	ASGVEGADVVK	11	0	1030.53	180.51		2	2	1			0	329790	282690	302930	0	0
601	1444	ASGVQVADEVCR	12	0	1289.6	202.27	1	1	1	1	1	2	14198000	912180	541080	2748600	3423100	4509000
602	1380	ASGVTVNDEVIK	12	0	1230.65	122.01	1	1	1	1	1	1	890410	43513	16436	144370	282180	509840
603	1542;330	ASIHEAWTDGK	11	0	1213.57	137.69					1	1	0	0	0	0	2779600	90518
604	449	ASITALEAK	9	0	902.507	160.37		2	1	1			0	1737100	21438	72936	0	0
606	1484	ASLENSLR	8	0	888.466	142.21		2	3	1	1	1	0	856300	1603500	802540	342430	273800
607	509	ASLGSLEGEAEAEASSPK	18	0	1731.82	157.83			1		1	1	0	0	24111	0	361330	58337
608	686	ASLNGADIYSGCCTLK	16	0	1728.78	146.45		1	1				0	86263	293430	0	0	0
609	1193	ASLSLAPVNIFK	12	0	1258.73	143.93		1	1	1	1	1	0	93495	152670	30844	787600	513900
610	257	ASMGTLAFDEYGR	13	0	1416.63	80.734					1	1	0	0	0	0	69448	126180
611	1226	ASMQQQQQLASAR	13	0	1445.7	94.988			1				0	0	0	0	0	0
612	1173	ASNLENSTYDLYTIPK	16	0	1827.89	116.93					1		0	0	0	0	77197	0
613	1437	ASNNTASIAQAR	12	0	1202.6	121.09	1	1	1	1	1		29738	205140	26022	21103	536600	0
614	1546	ASPDGLCQVSLQQGR	15	0	1614.78	119.55	1	1		1			131230	18838	0	108740	0	0
615	1102	ASPDLVPMGEWTAR	14	0	1528.73	122.36					1		0	0	0	0	259190	0
616	931	ASPDWGYDDK	10	0	1152.47	172.83	1	2	1	2	1	1	1339500	216960	43677	3707800	2266100	4621400
617	205	ASQDMFDK	8	0	940.396	117.65	1	1	1	1	1	1	6600.2	96283	9917.4	151550	87714	141110
618	614	ASQSQGIQQLLQAEK	15	0	1627.85	229.94	1	1	1	1	1	1	261900	407310	393970	434220	207380	457670
619	1616	ASQSVSSNLAWYQQK	15	0	1695.82	139.2						1	0	0	0	0	0	127840
620	497	ASSHSSQTQGGGSVTK	16	0	1517.71	152.13	1	1	1	1	1	1	9396.6	22086	7348.5	19162	46021	54683
621	1342	ASSLESGVPSR	11	0	1088.55	96.752		1		1			0	431320	0	124960	0	0
622	439	ASSSAGTDPQLLLYR	15	0	1577.8	105.75				1	1	1	0	0	0	25151	120980	108620
623	263	ASSTSPVEISEWLDQK	16	0	1775.86	273.17					1	1	0	0	0	0	497150	65268
624	1559	ASTPGAAAQIQEVK	14	0	1369.72	178.31	1	2	1	1	1	1	215550	648880	71272	311210	568040	2060400
625	100	ASVDSGSSEEQGGSSR	16	0	1538.64	90.145		1		1			0	14154	0	12289	0	0
626	748	ASVGFGGSCFQK	12	0	1243.57	140.65						1	0	0	0	0	0	0
627	1204	ASVPTIQDQASAMQLSQCAK	20	0	2133.02	182.29	2	2	2	1		2	851520	125460	316150	119510	0	432050
628	844	ASVSQVEADLK	11	0	1145.59	118.68	1	1	1	1	2	1	31818	505160	120430	62818	28075	47994
629	359	ASVTALIESVNGK	13	0	1287.7	136.99					1		0	0	0	0	220330	0
630	145	ASWSSLSMDEK	11	0	1239.54	99.23		1			1	2	0	39543	0	0	3606900	2164700
631	583	ASYAQQPAESR	11	0	1206.56	216.73		1		1		2	0	110240	0	82748	0	231070
632	547	ASYLDCIR	8	0	996.47	146.1	1	1	1	1	2	2	25391	76296	73942	28937	6418200	6971800
633	1254	ATAAPAGAPPQPQDLEFTK	19	0	1908.96	192.07	1	1	1	1	1	2	106890	153950	195510	484590	445610	422880
634	530	ATAAYEQLK	9	0	993.513	125.52		1	1	1	1	1	0	77222	31713	155140	234480	272050
635	494	ATADDELSFK	10	0	1095.51	78		1	1				0	172900	36689	0	0	0
636	73	ATAEQISSQTGNK	13	0	1333.65	243.4		2	1	1	1	1	0	133040	65550	144170	97426	161760
637	1570	ATAEVLNIGK	10	0	1014.57	143.37	1	1	1	1	1	1	228210	215640	130610	513050	588390	484200
638	470	ATAFNEQVDK	10	0	1121.54	136.57			1	1			0	0	16058	42276	0	0
639	1324	ATAGAYIASQTVK	13	0	1279.68	167.02	1		1				0	0	253510	0	0	0
640	1249;1310	ATAGDTHLGGEDFDNR	16	0	1674.72	246.12					1	1	0	0	0	0	781650	360020
641	36	ATAVMPDGQFK	11	0	1163.56	86.105	1	2	1		1	1	323070	5809900	3973900	0	2136100	4933600
642	667	ATAVVDGAFK	10	0	977.518	145.1	1	5	4	3	4	6	151090	2427800	799250	1615000	1498700	5128000
643	1234	ATCAPQHGAPGPGPADASK	19	0	1788.82	143.3		1		1	2	2	0	206280	0	19259	1727600	4933800
644	1211	ATCIGNNSAAAVSMLK	16	0	1606.78	233.6	1		1	1	2	2	24734	0	66543	29336	106530	802170
646	50	ATDAQLCLESSPK	13	0	1418.67	104.28				1			0	0	0	39009	0	0
647	269	ATDFVADR	8	0	893.424	146.62	1	2	1	1	1	2	35159	411910	92135	195250	237940	277160
648	1499	ATDTSQGELVHPK	13	0	1381.68	146.26		1			1	1	0	139090	0	0	91055	174540
649	288	ATDVMIAGK	9	0	904.469	157	1	1	1	1	1		49571	214760	108280	130340	115970	0
650	20	ATEEFIIR	8	0	977.518	148.85	1	2	1	2	2	2	81990	73023	25325	234310	158840	10771
651	513	ATEHLSTLSEK	11	0	1214.61	140.36		1		1	1		0	241380	0	143430	7943400	0
652	425	ATEPVIAFYEK	11	0	1266.65	121.58					1	1	0	0	0	0	111760	266130
653	326	ATFDAISK	8	0	851.439	109.13			1	1			0	0	6930.3	249950	0	0
654	1417	ATFVELSTK	9	0	994.534	115.91	1	1		1		1	41318	21621	0	97722	0	56942
655	450	ATGAEQEAQR	10	0	1059.49	80.604		1	1	1			0	16015	12071	5306.8	0	0
656	1212;1625	ATGPAAPPPR	10	0	933.503	96.382	1	1		1			684400	10060	0	34816	0	0
657	970	ATGPPVSELITK	12	0	1211.68	127.4	1	1	1	1	1	1	494290	6519200	11918000	708520	1627100	1956400
658	934	ATHGQTCAR	9	0	1000.45	174.8	1	1	1	1		1	52659	195440	312450	265280	0	0
659	385	ATIGADFLTK	10	0	1035.56	88.403					1	1	0	0	0	0	527880	189260
660	429	ATISNDGATILK	12	0	1202.65	163.81		2	1		2	1	0	645260	668450	0	359940	633070
661	1067;1479	ATITSLWGK	9	0	975.539	93.032					1		0	0	0	0	423910	0
662	1542	ATLPDADKER	10	1	1114.56	109.31		2	1	1	1	2	0	87752	10500	40145	482390	496340
663	564	ATNFLAHEK	9	0	1029.52	142.87	1	1	2	1	1	2	23255	88708	310920	27519	375370	473620
664	256	ATNWGSLLQDK	11	0	1231.62	100.45	1	2	2	2	3	1	163530	162810	38471	399280	335410	324420
665	438	ATNYNAGDR	9	0	980.431	108.53	1	1	1	1			17330	597740	55812	15476	0	0
666	831	ATPENYLFQGR	11	0	1294.63	85.395				1	1	1	0	0	0	6891.9	268070	173160
667	621	ATQALVLAPTR	11	0	1139.67	102.77		1	1	1	1	1	0	926370	338760	43971	391920	681710
668	476;595;1533	ATQQAEQLSNELATER	16	0	1787.87	342.45	2	1	1	2	2	4	19490000	224850	66375	3898600	15040000	21806000
669	222	ATSSSSGSLSATGR	14	0	1267.6	128.42	1	1	1	1	1	1	0	75820	82448	0	0	0
670	460	ATSTATSGFAGAIGQK	16	0	1466.74	107.44	1		1	1			100140	0	122690	79235	0	0
671	215	ATTATMATSGSAR	13	0	1224.58	137.44	1	1	1	1			40039	163140	98512	7471.8	0	0
672	1297	ATVLESEGTR	10	0	1061.54	78.884	1	1	1	1			19260	38104	26806	37855	0	0
673	1448	ATVLNYLPK	9	0	1017.59	136.28			1		1	1	0	0	10731	0	80210	2788400
674	591	ATVNLLGEEK	10	0	1072.58	116.68		1				1	0	127550	0	0	0	584940
675	959	ATVNQDTR	8	0	903.441	98.392	1		1	1			11493	0	26636	29445	0	0
676	179	ATVQQLEGR	9	0	1000.53	256.44	1	2	1	1	1	1	1117000	1594100	1146200	2223800	1302900	4607900
677	1065	ATVVESSEK	9	0	948.476	122.06	1	2	1	1			130570	276570	124560	275920	0	0
678	1200	ATVVYQGER	9	0	1021.52	121.37					1	1	0	0	0	0	663310	944380
679	560	ATWSGAVLAGR	11	0	1087.58	192.04		1			2	1	0	21011	0	0	369660	175680
680	1546	AVAAEAQDTATR	12	0	1202.59	198.62		2		2	1	1	0	148190	0	64243	109210	268640
681	1204	AVAAGNSCR	9	0	904.418	110.17	2	1	1	1		1	43097	10897	21121	12423	0	14053
682	1204	AVAEQIPLLVQGVR	14	0	1491.88	122.6					1		0	0	0	0	623360	0
683	1292	AVAFSPVTELK	11	0	1160.64	109.13					1	2	0	0	0	0	689160	904500
684	144	AVAGDASESALLK	13	0	1230.65	168.64		2	1	1	1	1	0	199790	216470	134680	853250	962820
685	1120	AVAGNISDPGLQK	13	0	1268.67	203.03	1	2		1	1	1	4037300	1119100	0	1213600	1917400	3783800
686	460	AVANYDSVEEGEK	13	0	1409.63	215.63		1		1	1	1	0	116020	0	0	65113	84319
687	1117	AVAQALEVIPR	11	0	1165.68	127.05					1	1	0	0	0	0	506720	658020
688	1204	AVASAAAALVLK	12	0	1083.67	182.67			1		2		0	0	5862.1	0	509820	0
689	793	AVASDFYLR	9	0	1040.53	98.566			1	1			0	0	92050	65605	0	0
690	1621	AVAVSGLDPAR	11	0	1054.58	117.17					1	1	0	0	0	0	90499	312080
691	594	AVAVVVDPIQSVK	13	0	1323.78	108.67					1	1	0	0	0	0	90151	120830
692	1236	AVDDGVNTFK	10	0	1064.51	99.904		1		1	1	1	0	1282500	0	34944	200390	250640
693	235	AVDEAADALLK	11	0	1114.59	121.95					1	1	0	0	0	0	100430	217890
694	1406	AVDSLVPIGR	10	0	1025.59	134.8		1	1	1	1	2	0	52765	153290	66859	1567700	1323000
695	1282	AVDSQILPK	9	0	969.549	160.42	1	1	1	1	1	1	67859	780620	1367200	91116	315340	573120
696	929	AVDTDMIDYEK	11	0	1298.57	160.29					1	1	0	0	0	0	115090	94209
697	1428	AVEHINK	7	0	809.44	136.09	1	2	1	1	1	1	39600	137840	53298	38981	1067100	671300
698	1503	AVELAANTK	9	0	915.503	154.21	4	3	2	2	1	1	1295900	2373200	733860	1492700	558600	409720
699	871	AVENSSTAIGIR	12	0	1216.64	170.52		2	1	1	2	2	0	367090	20943	303740	359300	416300
700	1212	AVESVVR	7	0	758.429	107.24	1						128310	0	0	0	0	0
701	173	AVETTAQSDNK	11	0	1162.55	128.23	1	1		1			6878	22795	0	15527	0	0
703	670	AVFDETYPDPVR	12	0	1407.67	126.46					1	1	0	0	0	0	13254	105170
704	798	AVFGELPSGGGTVEK	15	0	1446.74	89.398						1	0	0	0	0	0	590840
706	1097	AVGDGILCNTYIDSYK	16	0	1787.84	145.18					1		0	0	0	0	112410	0
707	555	AVGLAGTFR	9	0	890.497	89.788					1		0	0	0	0	302260	0
708	1481	AVGPEITK	8	0	813.46	92.229	1	1	1	1		1	55974	210010	52097	101580	0	39156
709	1444	AVIFCLSADK	10	0	1122.57	105.78					1		0	0	0	0	48188	0
710	193	AVLAESYER	9	0	1036.52	108.19					1	1	0	0	0	0	85429	87543
711	248	AVLCPPPVK	9	0	979.552	118.91	1	2	1	1	1	2	66378	931190	649560	77013	467490	741650
712	247	AVLCPQPTR	9	0	1040.54	105.92	1	1	2	1	1	1	168740	103460	421680	110250	284890	322670
713	488	AVLLAGPPGTGK	12	0	1079.63	127.39		1			1	1	0	173700	0	0	115480	256030
714	878	AVLLGPPGAGK	11	0	978.586	78.271		1			1	1	0	203720	0	0	167000	325870
715	402;403	AVLNPLCQVDYR	12	0	1446.73	104.81					1	1	0	0	0	0	444510	72868
716	401	AVLNPTPIK	9	0	951.575	97.012		1			1	1	0	107710	0	0	215000	433040
717	37	AVLQAAR	7	0	727.434	89.244	1	1	1	1			19198	55984	26529	18996	0	0
718	765	AVLSAEQLR	9	0	985.556	102.09					1	1	0	0	0	0	142870	158150
719	1478	AVLTIDEK	8	0	887.496	132.87	1	1	2	2	1	2	52895	106420	77052	62705	2981700	5943000
720	176	AVLVDLEPGTMDSVR	15	0	1600.81	129.6					2		0	0	0	0	616500	0
722	1099	AVQADGQVK	9	0	914.482	142.89	1	1	1	1			44692	156610	40597	134550	0	0
723	1353	AVQADQER	8	0	915.441	113.94		1	1	1			0	68672	12804	51429	0	0
724	1119	AVQEAQR	7	0	800.414	94.272	1			1			52122	0	0	127860	0	0
725	613	AVQEIMQEK	9	0	1074.54	92.32		1		1	1	1	0	373920	0	96046	35463	116980
726	1024	AVSDWIDEQEK	11	0	1318.6	85.946				1	1	1	0	0	0	10099	301870	505230
727	149	AVSNQIVR	8	0	885.503	155.83	2		1	1			556320	0	239780	396690	0	0
728	1212	AVSSQTNVR	9	0	960.499	138.11	1	1	1	1	1	1	697950	56299	26641	36357	172270	218260
729	1491	AVTEGAQAVEEPSIC	15	0	1559.71	175.82	1	1	1	1			51673	49299	5169.4	110700	0	0
730	947	AVTELNEPLSNEDR	14	0	1585.76	268.61	1	1	1	1	1	1	380250	476060	387430	513880	792670	1248700
731	419	AVTEQGAELSNEER	14	0	1531.71	232.9	1	2	2	1	1	2	273920	780180	73150	295970	1032800	1144900
732	946	AVTEQGHELSNEER	14	0	1597.73	238.58		1			2	2	0	47039	0	0	1476500	1021700
733	583	AVTLECVSAGEPR	13	0	1387.68	163.48				1	1	1	0	0	0	4308.8	296130	364210
734	227	AVTNFIR	7	0	819.46	101.21						1	0	0	0	0	0	793600
735	1204	AVTQALNR	8	0	871.488	128.24	2	4	1	2	2	2	836840	235310	119640	377560	892790	1216400
736	308	AVVGVVAGGGR	11	0	940.545	146.41	1	2	2	2	1	2	42222	145340	196210	249940	448800	279760
737	280	AVVISGAGK	9	0	800.476	94.314	1	1	1	1			100690	25778	135840	182710	0	0
738	670	AVYTQDCPLAAAK	13	0	1406.69	120.82	1		1	1	1	1	64103	0	206360	222770	24136	23213
739	1241	AWGAVVPLVGK	11	0	1095.64	106.75					1	1	0	0	0	0	182440	79399
740	1234	AWGPGLEGGVVGK	13	0	1225.65	144.11	1		1	1	2	2	230780	0	48251	8812.2	9982700	11976000
741	896	AWGPGLETGQVGK	13	0	1298.66	203.48		1	1		1	1	0	16836	11242	0	283180	462160
742	744	AYAAGFGDR	9	0	926.425	86.24		1		1	1	1	0	89725	0	8414.7	329600	397190
743	1024	AYAALAALEK	10	0	1019.57	136.02					1	1	0	0	0	0	162960	58951
744	618	AYAQGISR	8	0	864.445	155.56	1	4	3	2	2	1	47383	437410	163500	232820	373760	285290
745	747	AYAYLFK	7	0	874.459	127.54		1			1	1	0	44491	0	0	95431	47809
746	1539	AYGENIGYSEK	11	0	1229.56	169.1		2		1	1	2	0	228510	0	174200	569280	389460
747	1019	AYGGSMCAK	9	0	943.389	97.556	1	1	1	1			24765	243380	58275	58899	0	0
748	1234	AYGPGIEPTGNMVK	14	0	1432.7	180	1		1		1	2	1480800	0	536510	0	7149600	20923000
749	1503	AYGQALAK	8	0	820.444	142.27	1	1	2	1	1	1	261990	733250	210320	195210	154910	392900
750	866	AYLEEECPATLR	12	0	1450.68	161.07						1	0	0	0	0	0	498460
751	1529	AYLEGTCVDGLR	12	0	1352.64	180.38			1			1	0	0	29616	0	0	155890
752	113	AYLQQLR	7	0	890.497	161.36					1		0	0	0	0	875890	0
753	536	AYSDLSR	7	0	810.387	114.43		1	1		1	1	0	399040	24660	0	234110	270930
754	362	AYSDPSTGEPATYGELQQR	19	0	2068.93	122.09	1	1	1	1			76634	37384	19740	89547	0	0
755	1065	AYSEAHEISK	10	0	1133.54	177.09		1		1	1	1	0	49983	0	7233.1	170270	329280
756	1419	AYTNFDAER	9	0	1085.48	169.82	1	2	1	1	1	1	58158	594890	96886	806840	4581500	1895000
757	1549	AYYENSPQQVFSTEFEVK	18	0	2165	187.67					1		0	0	0	0	216360	0
758	1095	CAADLGLNK	9	0	960.47	145.05		2	2	1	1	1	0	1035000	341680	621550	502170	688830
759	1549	CAEENCFIQK	10	0	1297.54	133.44	1	2	1	1	1	1	114260	291340	42928	102870	134010	341920
760	1619;23;1489;1602	CAELEEELK	9	0	1119.51	202.56	1	2	1	1	1	2	2581400	639900	29079	675080	22107000	26431000
761	429	CAMTALSSK	9	0	967.447	97.447	1	2	1	1		1	17385	697910	137580	159010	0	124970
762	202	CAQGCICK	8	0	995.399	168.46	1	1	1	1		1	24820	80959	67099	63445	0	137040
764	269	CATITPDEAR	10	0	1132.52	143.69	1	1	2	2	1		144950	974840	131570	617130	270410	0
765	662	CATITPDEK	9	0	1033.47	144.15	1	1	1	1			36453	229420	63156	209310	0	0
766	392	CAVVDVPFGGAK	12	0	1218.61	139.75					1	1	0	0	0	0	1467800	588550
768	884	CCELPGLR	8	0	1003.46	89.947				1		1	0	0	0	10681	0	180820
769	1486	CCESASEDCMAK	12	0	1446.49	135.58		1	1	1			0	49172	6931.1	29779	0	0
770	1388	CCQDGVTR	8	0	994.396	98.04	1		1				6673.9	0	2471.5	0	0	0
772	918	CDAFVGTWK	9	0	1082.49	148.86	1	2	1	1	1	2	548530	164150	22491	394610	584080	768890
773	973	CDDLEALK	8	0	962.438	109.94		1		1	1	1	0	107880	0	54419	283600	403240
774	1028	CDEPILSNR	9	0	1102.51	163.77	1	2	1	2	1	1	172990	671280	428080	1036400	1638400	1538100
775	547	CDEWSVNSVGK	11	0	1279.55	219.84	1	2	1	1	1	2	179470	851340	345640	1014900	3584600	9662500
776	1072	CDFPIMK	7	0	909.409	97.288		1			1	1	0	66018	0	0	193810	458600
777	1302	CDFTEDQTAEFK	12	0	1489.6	330.18	2	3	2	2	3	3	61343	6137600	1490000	7846400	15531000	9265400
778	534	CDISAEIQQR	10	0	1218.57	98.565		1	1	1			0	133560	49869	104420	0	0
779	365;443	CDLEDER	7	0	935.365	108.64	1	1	1	1			73897	536320	25923	210120	0	0
780	1156	CDLELETNGR	10	0	1205.53	144.41	1	2	1	1	1		82045	146950	27438	72589	265250	0
781	1569	CDLISIPK	8	0	944.5	122.74					1	1	0	0	0	0	927710	913130
782	1272	CDSGFALDSEER	12	0	1384.56	148.33	1		1	1	1	1	20075	0	16645	8911.2	208030	1490500
783	1272	CECDMGFVPSADGK	14	0	1571.61	153.08	1	1		1	1	1	25232	65153	0	134170	285920	1920800
784	1272	CECEIGYELDR	11	0	1442.58	89.203						1	0	0	0	0	0	327230
785	1247	CEGINISGNFYR	12	0	1428.65	92.68			1		2	1	0	0	18486	0	275750	152170
786	1196	CELCDDGYFGDPLGR	15	0	1772.71	108.8					1		0	0	0	0	111480	0
787	914	CELLYEGPPDDEAAMGIK	18	0	2006.9	126.8					1	1	0	0	0	0	285960	17133
788	1264	CESAFLSK	8	0	940.432	90.203			1		1	1	0	0	101970	0	293150	229030
789	483	CESAPGCGVWQR	12	0	1405.59	229.36		1	1		1	2	0	515320	366150	0	1307300	1702200
790	583	CESCAPGYEGNPIQPGGK	18	0	1919.81	143.68	1			1			117560	0	0	17934	0	0
791	677	CETQNPVSAR	10	0	1160.52	128.4	3	1	1	1			82166	187440	5852.3	26288	0	0
792	740	CEVTEVSK	8	0	950.438	109.97				1			0	0	0	59898	0	0
793	501	CEWETPEGCEQVLTGK	16	0	1921.82	183.19		1				1	0	57425	0	0	0	252810
794	583	CFCMGVSR	8	0	1015.4	86.954						1	0	0	0	0	0	0
795	722	CFEGFGIDGPAIAK	14	0	1480.7	165.6					2		0	0	0	0	456110	0
796	1370	CFGGLQK	7	0	808.39	94.364		1			1	1	0	64872	0	0	582010	52523
797	1180	CFGTGAAGNR	10	0	1009.44	89.239		1	1				0	28429	12485	0	0	0
798	196	CFIVGADNVGSK	12	0	1265.61	98.742			1	1		1	0	0	78131	34737	0	113230
799	59	CGDSVYAAEK	10	0	1098.47	116.48	1			1			14371	0	0	6868.9	0	0
800	35	CGEMAQAASAAVTR	14	0	1421.64	147.89	1		1				0	0	90423	0	0	0
801	1357	CGFCNQPIR	9	0	1150.5	129.46					1	1	0	0	0	0	400670	409160
802	1325	CGFLPGNEK	9	0	1020.47	98.665		2	1			1	0	514490	190910	0	0	704450
803	726	CGGTLEER	8	0	920.402	101.41		1	1				0	39768	8887.4	0	0	0
804	1201	CGLVPVLAENYK	12	0	1361.7	76.801						1	0	0	0	0	0	958820
805	295	CGNCGPGYSTPLEAMK	16	0	1740.73	156.08			1		1	1	0	0	7389	0	243290	242960
806	1190	CGPASVQAIK	10	0	1029.53	138.64					1	1	0	0	0	0	269790	2042500
807	96	CGSGIVGAVVK	11	0	1045.56	148.72	1	1			1	1	0	25961	0	0	157720	489820
808	836	CGVALSTPGGAR	12	0	1144.57	79.211	1	1	1	1			193100	45415	95171	52039	0	0
809	392	CIAVGESDGSIWNPDGIDPK	20	0	2128.97	152.82					1	1	0	0	0	0	250620	33426
810	1272	CICNSGYEVDSTGK	14	0	1588.65	155.3		1				1	0	38903	0	0	0	410820
811	1272	CICPPGYSLQNEK	13	0	1564.7	191.16		1	1	1	1	1	0	82614	25959	54954	60753	1124700
812	1109	CICSQLSLTTK	11	0	1309.64	140.02		1				1	0	172480	0	0	0	152030
813	315	CIDSGLWVPNSK	12	0	1374.66	85.371	1				1	1	122360	0	0	0	174810	152150
814	144	CIELCCGSVK	10	0	1224.53	120.94		1			1	1	0	58154	0	0	200180	117520
815	227	CIGTDLNR	8	0	947.449	139.38		1	1		1	1	0	52304	20204	0	2377100	0
816	476;595;1533;449	CIIPNHEK	8	0	1009.5	96.654			1	1	1		0	0	5183.4	10469	5690900	0
817	1551	CIPALDSLTPANEDQK	16	0	1770.85	200.68		1	1			2	0	181120	274140	0	0	1056100
818	804	CLADAVVK	8	0	874.458	153.08		1	1	1	2	2	0	655960	41974	181470	637850	1053700
819	1201	CLAENAGDVAFVK	13	0	1392.67	182.24		2	1			2	0	434320	73122	0	0	2743000
820	560	CLAPLEGAR	9	0	985.501	73.65		1		1			0	144810	0	21833	0	0
821	1106	CLATGPGIASTVK	13	0	1273.67	130.27	1	1	1	1	1	1	43553	39370	286190	35572	172100	489950
822	1272	CLCPEGFSLSSSGR	14	0	1555.68	134.37						1	0	0	0	0	0	240360
823	1002	CLDAFPNLK	9	0	1076.53	117.8					1		0	0	0	0	422700	0
824	1100	CLDEFPNLK	9	0	1134.54	129.12		1			1	1	0	57468	0	0	614120	387320
825	986	CLSAAEEK	8	0	906.412	106.76	1	1	1				100190	734370	136120	0	0	0
826	1252	CLSSATDPQTK	11	0	1206.56	92.174	1	1	1				14621	51433	12147	0	0	0
827	670	CLSVMEAK	8	0	936.441	82.39			1	1	1	1	0	0	12878	43664	82214	117580
828	914	CLYASVLTAQPR	12	0	1377.71	165.01					1		0	0	0	0	566490	0
829	1135	CMGTVTLNQAR	11	0	1249.59	118.58		1	1				0	203970	145690	0	0	0
830	944	CMPTFQFFK	9	0	1204.54	77.725					1		0	0	0	0	116690	0
831	1589	CNAEEHVR	8	0	1013.43	114.84					1		0	0	0	0	46346	0
832	1186	CNELQDIEK	9	0	1147.52	168.13		1					0	119200	0	0	0	0
833	578	CNEPAVWSQLAK	12	0	1401.67	179.34		1	1		1	2	0	74580	50716	0	832510	2100700
834	476;595;1533;449;1305	CNGVLEGIR	9	0	1016.51	164.78	1	3	2	1	2	2	90084	251750	88588	29556	8803200	6095300
835	1524	CNTCGEPITDR	11	0	1321.54	101.69		1		1			0	70510	0	31646	0	0
836	593	CNTNTAIELK	10	0	1162.57	96.615		1		1			0	114320	0	32500	0	0
837	760	CNTPTYCDLGK	11	0	1327.55	102.19	1		1	1			39949	0	97635	80480	0	0
838	256	CPDIATQLAGTK	12	0	1273.63	87.186	1		1				43020	0	144180	0	0	0
839	609	CPFTGNVSIR	10	0	1149.56	114.61	1		1			1	84758	0	74667	0	0	249030
840	100	CPLLVDSEGWVK	12	0	1401.7	136.04					1		0	0	0	0	270320	0
841	147	CPNPPVQENFDVNK	14	0	1656.76	132.52	1	1		1			136070	110270	0	184210	0	0
842	1272	CPPGFYTSPDGTR	13	0	1453.63	104.95						1	0	0	0	0	0	339820
843	1272	CQCPSGMTLDATGR	14	0	1552.64	251.65					1	1	0	0	0	0	52482	526930
844	1542;330	CQLEINFNTLQTK	13	0	1607.8	223	1				2	1	25688	0	0	0	796770	781840
845	1078	CQLPEDVDPTSVTSALR	17	0	1886.9	164.12					1	1	0	0	0	0	41947	148080
846	222	CQSLQEELDFR	11	0	1423.64	144.81					1		0	0	0	0	384700	0
847	980	CQSLTEDLEFR	11	0	1396.63	112.36					1		0	0	0	0	239000	0
848	527	CQVAGWGSQR	10	0	1147.52	150.77		2	1		1	1	0	329110	385940	0	81231	364610
849	1433;1390	CQYVTEK	7	0	926.417	138.9	1	1	1	1			399100	2353500	202740	1200100	0	0
850	359	CSAGITGTNVVK	12	0	1205.61	186.68	1	1	2	2	1	1	141420	289220	318700	677850	972340	1989600
851	583	CSATGSPAPTIHWSK	15	0	1598.75	109.93					1		0	0	0	0	420220	0
852	583	CSATGSPTPTLEWTGGPGGQLPAK	24	0	2369.13	132.32		2				2	0	76249	0	0	0	785440
853	1272	CSCSPGWIGDGIK	13	0	1435.62	151.95		1			1	2	0	12713	0	0	578280	4046500
854	739	CSDFTEEICR	10	0	1315.52	110.42					1		0	0	0	0	248100	0
855	1221	CSGIASAAAAAVEAAR	16	0	1474.72	124.77					1		0	0	0	0	57351	0
856	1234	CSGPGLER	8	0	874.397	153.08	2	1	1	2	1	1	1758700	293950	34675	310930	920260	2403000
857	896	CSGPGLGAGVR	11	0	1029.5	93.565	1	1		1			390530	27337	0	83559	0	0
858	1234	CSGPGLSPGMVR	12	0	1216.57	177.11	1	1	1	1	1	2	1138200	74462	252680	170510	10350000	18409000
859	1272	CSNQLPQSITK	11	0	1274.63	185.1	1	1		1	2	1	177690	206110	0	87502	150700	677480
860	1408	CSQAVYAAEK	10	0	1125.51	254.9	2	1	1	1	1	1	7026300	263420	25589	809170	723750	2381500
861	144	CSSILLHGK	9	0	1013.53	97.187					1	1	0	0	0	0	152830	38586
862	1444	CSTPEEIK	8	0	962.438	127.59	1	2	2	2	2	1	612300	181000	31791	419550	331570	303410
863	547	CSTSSLLEACTFR	13	0	1530.68	248.7		1	1	1	2	2	0	4345.3	66116	19440	9066000	6076200
864	352	CSVNLANK	8	0	904.444	191.27	2			1			1933400	0	0	9350.5	0	0
865	19	CSWQDLK	7	0	935.417	140.43		1			1	1	0	63285	0	0	151500	226930
866	1200	CSYTEDAQCIDGTIEVPK	18	0	2084.9	100.35		1		1	1	1	0	24053	0	63068	24453	77989
867	539	CTDAVGDR	8	0	892.371	103.86	1	1		1			4683.9	33316	0	4810.5	0	0
868	1578	CTELNQAWSSLGK	13	0	1492.7	227.89			1		2	1	0	0	10090	0	506810	337870
869	1048	CTESEEEEVTK	11	0	1339.54	125.31		1	1	1			0	111280	12632	68101	0	0
870	600	CTGGEVGATSALAPK	15	0	1417.69	196.5	1	2	1	1	1	1	567530	1404100	643360	1068900	1008100	2016000
871	1204	CTQDLGNSTK	10	0	1122.5	118.27	1	1		1			30934	16632	0	45142	0	0
872	416	CTTDHISAAGPWLK	14	0	1555.75	113.54					1		0	0	0	0	223120	0
873	452	CTTPPPSSGPTYQCLK	16	0	1792.81	91.872	1	1	1	1		1	61116	57810	48943	41164	0	17736
874	912	CTVIAAANPIGGR	13	0	1298.68	108.79		1	1			1	0	39699	241440	0	0	23406
875	1234	CTVTGAGIGPTIQIGEETVITVDTK	25	0	2559.31	99.731					1		0	0	0	0	106430	0
876	1545	CVANNQVETLEK	12	0	1403.67	109.1		1					0	351710	0	0	0	0
877	744	CVCEQGFK	8	0	1026.43	156.27	1	1	1	1			34440	56988	9300.1	10570	0	0
878	1000	CVDVDECAPPAEPCGK	16	0	1802.73	100.65	1						86452	0	0	0	0	0
879	362	CVEDPETGLR	10	0	1174.53	91.634	1			1		1	2305.4	0	0	2932.4	0	163000
881	1548	CVMDDDNEVR	10	0	1251.49	84.069		1			1		0	158920	0	0	75028	0
882	187	CVNTTLQIK	9	0	1075.57	140.86		2	1	1	2	2	0	757500	1262500	114650	630480	1294000
883	1204	CVSCLPGQR	9	0	1075.49	117.78	1		1			1	467930	0	31173	0	0	493870
884	401;248;247;391	CVVVGDGAVGK	11	0	1059.54	100.54		1	1	1	1	1	0	720850	110260	533080	1062000	1094200
885	954	CYEMASHLR	9	0	1165.5	108.21		1	1		1		0	38294	4056.4	0	626280	0
886	898	CYTAVVPLVYGGETK	15	0	1655.82	217.11					1	1	0	0	0	0	2693300	58325
887	980	DAALATALGDK	11	0	1044.55	111.73		1	1	1	1	1	0	745040	321560	74336	584280	356070
888	1557	DADIGVAEAER	11	0	1144.54	127.8						1	0	0	0	0	0	158720
889	351	DADLTDTAQTR	11	0	1205.55	205.24		1		1			0	167720	0	122590	0	0
890	156	DADPILISLR	10	0	1111.62	94.737					1		0	0	0	0	0	0
892	134	DAEDAMDAMDGAVLDGR	17	0	1750.71	168.67		1	1		1	1	0	94178	56633	0	263380	494580
893	922	DAEDAVYGR	9	0	994.436	176.4		1		1	2	1	0	997650	0	436020	132060	181680
894	1119	DAEEAISQTIDTIVDMIK	18	0	1990.98	144.16	1						58025	0	0	0	0	0
895	1234	DAEMPATEK	9	0	990.433	108.13	1	1	1	1			471120	132890	16414	169340	0	0
896	1457	DAFADAVQR	9	0	991.472	108.8		1	1				0	0	114030	0	0	0
897	186;185	DAFPVAGQK	9	0	931.476	100.79			1				0	0	0	0	0	0
898	1234	DAGEGGLSLAIEGPSK	16	0	1499.75	234.91	2	1	1	1	2	3	624430	293660	189390	175270	1672900	5103800
899	896	DAGEGGLSLAVEGPSK	16	0	1485.73	185.5				1	1	1	0	0	0	131090	6928.3	305540
900	1234	DAGEGLLAVQITDPEGK	17	0	1711.86	153.28	1	1			2	1	56648	12996	0	0	910840	2840800
901	1054	DAGHPLYPFNDPY	13	0	1504.66	97.891					1		0	0	0	0	646530	0
902	421	DAGMQLQGYR	10	0	1137.52	95.669	1	1	1	1			106740	140990	80388	248410	0	0
903	238	DAGPLLISLK	10	0	1025.61	171.5					1	1	0	0	0	0	432010	227680
904	178	DAGQISGLNVLR	12	0	1241.67	128.46		1	1		1	2	0	0	59539	0	531370	1089300
905	82	DAGTIAGLNVLR	12	0	1198.67	212.22					2	2	0	0	0	0	4912700	4790800
906	65	DAGTIAGLNVMR	12	0	1216.62	189.19					1	1	0	0	0	0	2397400	539540
907	174	DAGTITGLNVLR	12	0	1228.68	188.98					1	1	0	0	0	0	799800	452860
908	1249	DAGVIAGLNVLR	12	0	1196.69	218.26					2		0	0	0	0	1338700	0
909	1106	DAGYGGISLAVEGPSK	16	0	1519.75	128.28	1				1		48236	0	0	0	28053	0
910	1234	DAGYGGLSLSIEGPSK	16	0	1549.76	132.7	1				1		54248	0	0	0	356880	0
911	873	DAIAQAEMDLK	11	0	1203.58	94.193		1			1		0	36385	0	0	42010	0
912	1503	DAIAQAVR	8	0	842.461	162.04	2	3	4	3	2	1	564580	2303500	752410	586230	260300	235530
913	86	DAINQGMDEELER	13	0	1518.66	175.67					1	1	0	0	0	0	387790	100730
914	54	DAISGIGTDEK	11	0	1104.53	159.85	2	2	1	1	1	1	692880	3758700	121670	257770	409850	995920
915	1419	DALNIETAIK	10	0	1086.59	197.84	1	1	1	1	2	4	112310	319900	361920	194190	12229000	8619400
916	917	DALNQATSQVESK	13	0	1389.67	239.3		1	1	1	1	1	0	381090	174240	796130	300930	591880
917	518	DALSSVQESQVAQQAR	16	0	1715.84	286.85	2	2	2	2	1	1	201810	612070	77245	238310	390580	411990
918	884	DALVSQPTR	9	0	985.519	104.25	3	1	1	2	1		895620	63523	20189	2908100	18728	0
919	578	DAMQYASESK	10	0	1128.48	233.56		1	1	2			0	367490	28492	256700	0	0
920	961	DANGNSFATR	10	0	1051.47	104.08	1	1	1	1			28724	425880	0	0	0	0
921	209	DANNGNLQLR	10	0	1113.55	115.96		2	2	1	1	1	0	131080	45094	50170	39446	107030
922	532	DANSVTSSLR	10	0	1048.51	163.74		1					0	126800	0	0	0	0
923	1234	DAPQDFHPDR	10	0	1196.52	99.625					1	1	0	0	0	0	440290	375270
924	1384	DAQELYAAGENR	12	0	1335.61	195.57	1	1	2	1	1	1	107190	274500	73443	177100	512440	375130
925	1432	DAQIFIQK	8	0	961.523	89.547						1	0	0	0	0	0	59232
926	453	DAQYAPGYDK	10	0	1126.49	168.2		1	1	1		2	0	109920	5327.7	120790	0	314350
927	502	DASDDLDDLNFFNQK	15	0	1755.76	204.63					1		0	0	0	0	196110	0
928	1554;1618	DASGATFTWTPSSGK	15	0	1511.69	191.13	1	1	1	2	3	3	218190	917570	500430	6711500	2540200	5538300
929	1414;1338	DASGVTFTWTPSSGK	15	0	1539.72	216.24	1	2	2	2	2	4	67232	348740	235050	307860	3536400	11913000
930	1193	DASLMVTNDGATILK	15	0	1547.79	140.73						1	0	0	0	0	0	176980
931	752	DATLTALDR	9	0	974.503	122.68		1		2	1	1	0	516260	0	5164.2	413420	616340
932	1428	DATNVGDEGGFAPNILENK	19	0	1959.92	295.49		1	1	1	1	2	0	1448800	1203500	57441	27830	411500
933	1322	DAVIQDLER	9	0	1057.54	102.51	1			1	1	2	21208	0	0	4869.4	342940	320220
934	1583	DAVSSGVASVVDVAK	15	0	1402.73	147.61						1	0	0	0	0	0	169600
935	1583	DAVTTGVTGAVNVAK	15	0	1401.75	122.44						1	0	0	0	0	0	77154
936	1415	DAVTYTEHAK	10	0	1133.54	193.6	2	3	4	2	2	3	577870	11942000	1084500	3929500	20991000	17834000
937	716	DCAVIVTQK	9	0	1032.53	82.046				1	2		0	0	0	159030	186080	0
938	1552	DCEDPNPLIR	10	0	1227.56	90.235		1	1	1	1		0	110190	82099	43759	230170	0
939	1578	DCEQAENWMAAR	12	0	1479.59	172.45					1	1	0	0	0	0	396380	511700
940	352	DCFTCSNCK	9	0	1190.42	140.43	1			1			171680	0	0	78602	0	0
941	1232	DCGSVDGVIK	10	0	1048.49	94.459		1		1	1	1	0	518950	0	42169	40910	165330
942	547	DCHLAQVPSHTVVAR	15	0	1688.84	142.57					2	1	0	0	0	0	1044000	314040
943	1116	DCLINAAK	8	0	903.448	110.38		1	1	1			0	634100	6582	126940	0	0
944	367	DCLNVLNK	8	0	974.486	118.47		1					0	82299	0	0	0	0
945	1156	DCLTESNLIK	10	0	1191.58	140.05		2	1	1	1	2	0	874420	207670	62918	484370	1659200
946	329;1615	DCPDPCIGW	9	0	1118.42	119.81		1	1	1	1	3	0	311220	149630	397630	285950	291680
947	520;1369	DCQDIANK	8	0	962.413	216.48	1	1	1	1	1	1	271540	4186100	717290	384630	37493	326840
949	868	DCVGPEVEK	9	0	1031.46	92.225	2	1	1	1			267500	11689	80225	1256700	0	0
950	1551	DDAMLLK	7	0	804.405	110.74		1	1		1		0	1282800	139360	0	128460	0
951	112	DDDDVVIGK	9	0	974.456	138.05		1	1	1			0	158460	22579	82873	0	0
953	1248;1064	DDDLNLR	7	0	859.404	171.49	1	1	1		1	1	32350	1685600	49483	0	1903100	4595100
954	1248	DDDPLNAR	8	0	914.409	109.1		2	1	1	2	1	0	143590	10758	125540	100300	177250
955	56;1604	DDDSDLYSPR	10	0	1181.48	147.27					1	1	0	0	0	0	270920	89561
956	1048	DDDWGNIK	8	0	961.414	97.248		1		1	1	1	0	98882	0	4126.2	42749	30782
957	112	DDETMYVESK	10	0	1215.5	228.52	1	1	2	1	1	1	136520	708930	54935	159660	77748	163160
958	160	DDEVQVVR	8	0	958.472	134.37	1	1	1	3		1	32346	637110	96370	270100	0	181850
959	362	DDGTGQLLLPLSDAR	15	0	1569.8	91.862						1	0	0	0	0	0	69008
960	472	DDIECPLGWK	10	0	1231.55	112				1		1	0	0	0	9635.1	0	139500
961	178	DDIENMVK	8	0	962.438	136.47	1	2	1		1	1	17362	1526600	266230	0	390950	702720
962	794	DDLGNTLEK	9	0	1003.48	109.08		1	1	1	1	1	0	46608	25185	173280	138970	272530
963	1566	DDLQGAQSEIEAK	13	0	1402.66	244.52	1			1		1	436450	0	0	108700	0	544880
964	1475	DDLSFAGYQK	10	0	1142.52	146.3		2	1		1	1	0	219110	113910	0	182880	79236
965	270	DDLSGADIK	9	0	932.445	111.92		1		1			0	85641	0	48846	0	0
966	1539	DDMIFEDCGDVPSEPK	16	0	1852.75	81.131		1		1		1	0	39249	0	25299	0	160230
967	1398	DDMLCAGNTR	10	0	1151.47	238.5	1	1	1	2	1	1	233250	496660	46050	625290	741960	1140200
968	1089	DDNMFQIGK	9	0	1066.48	141.82		1	2		1	2	0	143080	80197	0	1124100	757550
970	1542	DDPLTNLNTAFDVAEK	16	0	1761.84	174.15					1		0	0	0	0	2495400	0
971	330	DDPVTNLNNAFEVAEK	16	0	1774.84	171.92		1			1	1	0	46738	0	0	185340	407940
972	987	DDSNLYINVK	10	0	1179.58	110.51		1	1	1		1	0	99470	52798	94255	0	12679
973	483	DDTDDEIAK	9	0	1020.42	125.44	1	1	1	1			15906	78269	14857	58887	0	0
974	1059	DDTIYEDEDVK	11	0	1340.56	107.28					1	1	0	0	0	0	387060	297880
975	547	DDTVCLAK	8	0	920.427	175.04	2	2	4	2	1	1	2123000	4690200	534500	3811900	651960	3075700
976	390;1102	DDVQGYAAK	9	0	965.445	91.278		1		1			0	22180	0	48642	0	0
977	1325	DEAAYGELR	9	0	1022.47	109.54	1	3	1	3	2	1	121040	3151300	411410	782430	1156600	1069400
978	1111	DEENTANSFLNYR	13	0	1571.69	135.74					1		0	0	0	0	624070	0
979	1507	DEFEGLFK	8	0	983.46	115.41					1		0	0	0	0	60807	0
980	385	DEFLIQASPR	10	0	1174.6	120.05	1	1			1		18687	34544	0	0	42178	0
981	48	DEFTNTCPSDK	11	0	1312.52	214.86		1					0	118460	0	0	0	0
982	1160	DEGLAVMDK	9	0	976.454	91.711		1				1	0	108820	0	0	0	82332
983	1562	DEGNYLDDALVR	12	0	1378.64	225.35		2			2	2	0	86227	0	0	2921500	2239100
984	1167	DEIDSAVK	8	0	875.424	88.643			1	1	1		0	0	12761	178630	56864	0
985	476;595;1533	DEIFATAK	8	0	893.449	141.14	1			1			401970	0	0	57906	0	0
986	274	DEILPTTPISEQK	13	0	1469.76	169.42	1	1	1	1	1	1	216450	1960100	958460	2142800	1575600	4212400
987	449	DELADEIANSSGK	13	0	1347.62	216.66	1	1	1	1	1	1	700390	2226500	513490	1315700	638650	1317100
988	1057	DENATLDGGDVLFTGR	16	0	1678.78	171.31		1	1	1	2	1	0	20825	17992	10142	162980	276290
989	281	DENSVELTMAEGPYK	15	0	1681.75	251.06		1	1		1	1	0	181370	159700	0	75799	254280
990	1038	DEQLESLFQR	10	0	1263.61	201.99					1		0	0	0	0	118920	0
991	745	DEQQISAAVEK	11	0	1216.59	165.97			1	1	1	2	0	0	31229	52894	78268	247000
992	1283	DESENLLNQAR	11	0	1287.61	100.3		1		1			0	66805	0	58224	0	0
993	640	DESSPYAAMLAAQDVAQR	18	0	1921.88	126		1			1	1	0	25895	0	0	122470	97674
994	1384	DESTNVDMSLAQR	13	0	1464.65	153.79	1	1	1	1			153380	208110	83391	135040	0	0
995	720	DETEFYLGK	9	0	1100.5	202.11					1	1	0	0	0	0	1291500	683530
996	1581	DETNYGIPQR	10	0	1191.55	201.66	1	3	1	1	1	1	272830	539860	195760	673410	635880	891710
997	854	DETVDDFWR	9	0	1181.5	196.16					1	1	0	0	0	0	337180	54836
998	884	DEVIEAVR	8	0	929.482	123.56	1	2		1	2	2	252330	404070	0	398140	977630	550860
999	815	DEVQNAVQR	9	0	1057.52	239.64	2	3	2	2	1	1	1670100	2027900	78680	3749700	2973900	8353800
1000	118	DEYDDLSDLNAVQMESVR	18	0	2097.92	170.67					1	1	0	0	0	0	58681	112880
1001	620	DFADIPNLR	9	0	1059.53	147.42		1		1	3	3	0	42024	0	9060	33636000	16489000
1002	1549	DFDFVPPVVR	10	0	1189.61	100.44			1		1		0	0	10796	0	1581700	0
1003	293	DFEPSLGPVCPFR	13	0	1519.71	219.43					2	2	0	0	0	0	16137000	81110
1004	1209	DFEQISK	7	0	865.418	96.233			1	1	1		0	0	10759	44564	2660900	0
1005	251	DFEQPLAISR	10	0	1174.6	150.94					1	2	0	0	0	0	329100	1010200
1006	193	DFESCLGAK	9	0	1025.45	77.103		1	1				0	35250	6337.5	0	0	0
1007	1349	DFINFISDK	9	0	1097.54	110.84					1	1	0	0	0	0	29428	25288
1008	161	DFLAGGVAAAISK	13	0	1218.66	192.13					1	1	0	0	0	0	2234000	52153
1009	558	DFLAGGVAAAVSK	13	0	1204.65	121.65					1		0	0	0	0	164400	0
1010	915	DFLDEYIFLAVGR	13	0	1556.79	86.723					1	1	0	0	0	0	206790	33888
1011	86	DFLIPIGK	8	0	901.527	91.735			1		1	1	0	0	9668.2	0	65200	103050
1012	149	DFLPLVLGK	9	0	1000.6	76.507					1		0	0	0	0	40652	0
1013	729	DFLQSLK	7	0	849.46	95.85						1	0	0	0	0	0	0
1014	1511	DFMIQGGDFTR	11	0	1285.58	120.12		1			1		0	9981.1	0	0	752190	0
1015	554	DFMYVSQDPK	10	0	1228.54	145.83				1	2	1	0	0	0	5292.3	272180	182840
1016	320	DFNEECPR	8	0	1065.42	127.46		1		1	1	1	0	117310	0	29376	176230	128200
1017	1163	DFNMPLTISR	10	0	1192.59	127.12					1		0	0	0	0	96620	0
1018	565	DFNVPLSISR	10	0	1146.6	144.18					2	1	0	0	0	0	4570800	122570
1019	173	DFPELTMEVDGK	12	0	1379.63	84.853					1		0	0	0	0	138340	0
1020	769	DFSAPLTISR	10	0	1105.58	137.99		1			1	2	0	12384	0	0	159030	500730
1021	118	DFSLEQLR	8	0	1006.51	169.49		1	1	1	2	2	0	29356	6898.7	12985	485110	121660
1022	42	DFTATDLSEFAAK	13	0	1414.66	245.92	2		1	1	2	1	22611	0	59987	16750	670430	732980
1023	1056	DFTPVCTTELGR	12	0	1394.65	189.42	2	1	1	1	1	2	133360	227420	112720	182680	1716900	3484600
1024	844	DFTSLENTVEER	12	0	1438.66	138.03					2	1	0	0	0	0	10682	230020
1025	1066	DFVTEALQSR	10	0	1164.58	156.7	1			1	1		46588	0	0	25429	59001	0
1026	92	DFYELEPEK	9	0	1168.53	110.49					1	1	0	0	0	0	105870	393790
1027	1491	DFYMTDSISR	10	0	1233.53	83.048				1	1		0	0	0	37369	44731	0
1028	167	DFYNPVVPEAQK	12	0	1405.69	156.63					1	1	0	0	0	0	623130	239730
1029	1201	DGAGDVAFIR	10	0	1019.5	176.83		2	2	2	1	2	0	422180	83662	20854	76741	475980
1030	547	DGAGDVAFVK	10	0	977.482	173.09	2	2	2	1	1	1	1560200	8777300	887940	4404300	6334000	9966800
1031	1357	DGAPFCPECYFER	13	0	1646.65	169.84					1		0	0	0	0	303400	0
1032	596	DGDFENPVPYTGAVK	15	0	1607.75	103.08	1	1	1		1	1	68022	526030	232910	0	151410	48674
1033	816	DGDGTITTK	9	0	906.429	159.06	1	1	1	1	1	1	57264	261530	27504	277350	156490	196780
1034	1058	DGDILGK	7	0	716.37	105.42	1	1	2	1	1	2	32123	297480	46359	135530	15663	170510
1035	56	DGDIVDVMEK	10	0	1119.51	76.944						1	0	0	0	0	0	465770
1036	1056	DGDSVMVLPTIPEEEAK	17	0	1828.88	103.71	1	1	1	1	2	1	47469	93314	163790	55605	1053100	1229900
1037	1441;648;1610;1529;1543;1627;1439;1626	DGEDQTQDTELVETR	15	0	1734.75	212.29					1	1	0	0	0	0	281130	633540
1038	612;1594	DGEEAGAYDGPR	12	0	1235.51	153.69		1	1	1			0	1135600	6029	189720	0	0
1039	767	DGELYCK	7	0	883.375	156.1	1	1	1	1	1	1	254050	40585	3829.1	104430	238750	188440
1040	955	DGETLEELMK	10	0	1163.54	137.58		1	1			1	0	15939	5809.3	0	0	95638
1041	1426	DGEVVSEATQQQHEVL	16	0	1767.83	127.1	1			1	1	2	234940	0	0	209160	3317500	1206100
1042	1144	DGFVALSK	8	0	835.444	89.993		1		1	1	1	0	30746	0	10158	67932	99422
1043	1181	DGFVQDEGTMFPVGK	15	0	1625.74	130.37					1	1	0	0	0	0	95718	115160
1044	1021	DGGAWGTEQR	10	0	1075.47	162.46		2	2	2	1	1	0	1681100	178700	634110	1463900	2041900
1045	303	DGGFCEVCK	9	0	1070.42	127.58	1	3	2	2	1	1	105280	765470	142720	233130	81804	100650
1046	238	DGGLICTSCR	10	0	1137.49	87.039	1	1	1		1	1	4313.6	6463500	5852.8	0	89487	147910
1047	884	DGIDLAGFK	9	0	934.476	161.14					1	2	0	0	0	0	640960	4118400
1048	676	DGIEPMWEDEK	11	0	1347.57	127.07		1			1	1	0	6005.6	0	0	199410	263200
1049	318	DGLAEDLAALK	11	0	1114.59	175.22					2		0	0	0	0	1942500	0
1050	232	DGLEMEK	7	0	820.364	96.109	1	1	1	1			26588	485080	22601	111390	0	0
1051	1199	DGLILTSR	8	0	873.492	118.49		1			1	1	0	67116	0	0	462160	272590
1052	295	DGLIPLEIR	9	0	1024.59	138.97					1		0	0	0	0	1089500	0
1053	738	DGLTDVYNK	9	0	1023.49	133.04		1			1	1	0	285320	0	0	362960	405480
1054	816	DGNGYISAAELR	12	0	1264.6	209.96	2	1	1	1	1	2	121550	1378800	638500	241940	11464000	8764400
1055	1137	DGPALSGPQSR	11	0	1083.53	112.78		2	2	1		1	0	312300	324890	73422	0	12658
1056	752	DGPGFYTTR	9	0	1012.46	94.454	1	1	1	1			21188	132760	85338	190060	0	0
1057	144	DGPNALTPPPTTPEWIK	17	0	1832.93	148.99		1	1		1	1	0	68248	59556	0	400850	876320
1058	1581	DGQAMLWDLNEGK	13	0	1475.67	209.5	1				2	1	19544	0	0	0	911710	130690
1059	1393	DGQVINETSQHHDDLE	16	0	1835.79	149.28					1	1	0	0	0	0	592490	545600
1060	1234	DGSCGVAYVVQEPGDYEVSVK	21	0	2257.02	241.61	2	1		1	1	2	1644000	147250	0	228640	321190	1726100
1061	896	DGSCGVSYVVQEPGDYEVSIK	21	0	2287.03	201.58	1				1	1	161120	0	0	0	62555	267200
1062	645	DGSVAIASK	9	0	846.445	90.813	1	1	1	1			30438	12889	5707	50824	0	0
1063	922	DGTGVVEFVR	10	0	1077.55	137.32					1	1	0	0	0	0	492810	166440
1064	1532	DGTIDFTPGSELLITK	16	0	1705.88	153.4					1		0	0	0	0	579760	0
1065	366	DGTILCTLMNK	11	0	1264.62	149.13					1		0	0	0	0	195680	0
1066	1106	DGTYAVTYIPDK	12	0	1341.65	116.08		1		1	2	2	0	80315	0	99194	189920	239530
1067	1351	DGVLTLANNVTPAK	14	0	1411.77	188.73					1	1	0	0	0	0	72568	239450
1068	622	DGVVEITGK	9	0	916.487	136.66	1	2	3	2	2	2	1659700	877350	122080	1564800	2608300	3905100
1069	261	DGVVLFK	7	0	776.443	120.73		1				1	0	30289	0	0	0	0
1070	722	DGWSAQPTCIK	11	0	1261.58	107.42		1		1	1	1	0	6738.3	0	160690	126030	365670
1071	416	DGYAQILR	8	0	934.487	132.69		1			1	2	0	27033	0	0	273650	235950
1072	922	DGYDYDGYR	9	0	1122.43	107.54		1					0	135430	0	0	0	0
1073	337	DGYNYTLSK	9	0	1059.49	179.17	1	2	1	1	1	1	2007600	8882400	1921800	1365100	1399000	1963600
1074	238	DGYVPPK	7	0	774.391	99.452	1	2	1	1	1	1	32390	125410	48638	71416	86306	127010
1075	261	DHENIVIAK	9	0	1037.55	118.88					1	1	0	0	0	0	477310	228310
1076	1496	DIAPTLTLYVGK	12	0	1289.72	80.133					1		0	0	0	0	200940	0
1077	1537	DIAWTEDSK	9	0	1063.48	74.221		1			1	1	0	261330	0	0	254060	367510
1078	1549	DICEEQVNSLPGSITK	16	0	1788.86	139.67	1	1	1		2	2	516010	808050	198410	0	488880	68900
1079	294	DIDENAYAK	9	0	1037.47	125.45	1	1	1	1			9489.5	254900	25830	11130	0	0
1080	1236	DIDEVSSLLR	10	0	1145.59	161.34	1				1	1	30787	0	0	0	684560	0
1081	509	DIDISSPEFK	10	0	1149.56	81.032			1		1	1	0	0	4102.6	0	230220	79001
1082	646	DIDNLVQR	8	0	971.504	161.79		2			1	1	0	776890	0	0	0	561660
1083	895	DIDPQNDLTFLR	12	0	1445.72	133.29					1		0	0	0	0	413290	0
1084	143	DIEAMDPSILK	11	0	1230.62	120.72						1	0	0	0	0	0	168750
1085	922	DIEDVFYK	8	0	1027.49	131.42			1		1	1	0	0	8074.8	0	674800	507820
1086	1562	DIEQSIK	7	0	831.434	101.5		1				1	0	315140	0	0	0	127540
1087	662	DIFQEIYDK	9	0	1169.56	101.71					1		0	0	0	0	197720	0
1088	1167	DIIACGFDINK	11	0	1264.61	149.37			1		2	1	0	0	21406	0	310620	164740
1089	1419	DIISDTSGDFR	11	0	1224.56	212.03	3	2	1	2	3	2	72941	498340	126160	1184700	19630000	12845000
1090	1506	DIISIAEDEDLR	12	0	1387.68	260.24		1			1		0	487380	0	0	864470	0
1091	343	DILAQSPAAEPLK	13	0	1351.73	100.04					1	1	0	0	0	0	237880	485660
1093	1171	DIMAEIYK	8	0	981.484	91.678					1		0	0	0	0	44535	0
1094	1168	DIMTDPSWPQK	11	0	1316.61	110.44					1	1	0	0	0	0	88754	113620
1095	903	DINAVAASLR	10	0	1028.56	127.09						1	0	0	0	0	0	204380
1096	1056	DINAYNCEEPTEK	13	0	1581.66	176.87	1		1	1	1	1	286580	0	22455	10875	465520	604280
1097	770	DINYVNPVIK	10	0	1173.64	137					1	1	0	0	0	0	106480	596110
1098	512	DIPGLTDTTVPR	12	0	1283.67	141.64	1	1	1	1	1	2	8282	367340	327370	121330	754640	2663500
1099	1552	DIPNENELQFQIK	13	0	1586.79	101.73					1		0	0	0	0	70462	0
1100	660	DIQEDSGMEPR	11	0	1275.54	116.24		1			1	1	0	119450	0	0	89929	56006
1101	1333	DIQLTQSPSSLSASVGDR	18	0	1859.92	229.53	1			1		1	243240	0	0	133920	0	121140
1102	70	DIQMTQSPSSLSASVGDR	18	0	1877.88	302.54	2	1	1	1	1	1	2957400	825720	417230	1980300	319500	2405800
1103	1343	DIQMTQSPSSLSATVGDR	18	0	1891.89	137.98	1	1	1			1	122250	46370	59850	0	0	183670
1104	71	DIQMTQSPSSVSASVGDR	18	0	1863.86	223.02	1		1	2		2	370110	0	16539	226230	0	249690
1105	1342	DIQMTQSPSTLSASVGDR	18	0	1891.89	280.26	1	1	1	2	2	2	1423400	424640	182260	874660	175900	1190900
1106	453	DISEVVTPR	9	0	1014.53	140.98		2		2		1	0	41880	0	248560	0	509330
1107	36	DISLSDYK	8	0	939.455	149.89	1	2	1	1	1	3	87655	1968600	1826600	56821	136180	2549300
1108	627	DISTLNSGK	9	0	933.477	83.369	1		1	1		1	56165	0	65141	142530	0	75354
1109	663	DISTNYYASQK	11	0	1288.59	238.01	1	2	1	1	1	1	696740	2543400	531870	2417100	584710	1401900
1110	1008	DISTTLNADEAVAR	14	0	1474.73	143.93		1	1	1	1	2	0	140960	97091	73251	12622	37863
1111	1006	DITSDTSGDFR	11	0	1212.53	221.68	1	1		1	1	1	1024200	1436300	0	972390	1644000	5127600
1112	1345	DIVMTQSPDSLAVSLGER	18	0	1916.95	214.58						1	0	0	0	0	0	372600
1113	543;468	DKCEPLEK	8	1	1017.48	104.21					1	1	0	0	0	0	205240	420910
1114	231	DKDPPIPVAK	10	1	1078.6	82.152		1	1	1	1	1	0	184010	7298.6	101720	78944	98938
1115	1234	DKGEYTLVVK	10	1	1150.62	96.697					2	1	0	0	0	0	1241400	215460
1116	172	DKLDQVSSEIK	11	1	1260.66	85.185					1	1	0	0	0	0	229570	193420
1117	1578	DLAALGDK	8	0	801.423	85.246	1	1	1	1		1	15815	192480	18587	7023.5	0	280930
1118	1234;896;1106	DLAEDAPWK	9	0	1043.49	153.03	2	1	2		2	2	158510	107930	111250	0	3622300	16824000
1119	437	DLAEDLYDGQVLQK	14	0	1605.79	169.85					2		0	0	0	0	1529700	0
1120	1364	DLAEITTLDR	10	0	1145.59	140.3						1	0	0	0	0	0	189750
1121	269	DLAGCIHGLSNVK	13	0	1382.7	101.55					1		0	0	0	0	191160	0
1122	935	DLAGSIIGK	9	0	872.497	118.78		1	1		1	2	0	64713	154900	0	286190	222970
1123	666	DLALAIR	7	0	770.465	118.86		1					0	0	0	0	0	0
1124	1578	DLASVNNLLK	10	0	1085.61	123.37		1			1	3	0	26209	0	0	575390	1905700
1125	1578	DLASVQALLR	10	0	1084.62	158.05					1		0	0	0	0	229980	0
1126	20	DLAVAGPEMQVK	12	0	1256.64	108.17					1	1	0	0	0	0	241600	224310
1127	1466	DLCGIVASK	9	0	961.49	150.46		1	1				0	130940	297360	0	0	0
1128	1204	DLDQASLAAVSQQLAPR	17	0	1781.93	95.122		1			1	2	0	41349	0	0	395750	1644700
1129	449	DLEAHIDSANK	11	0	1211.58	174.85					1	1	0	0	0	0	176510	355830
1130	497	DLEALLNSK	9	0	1001.54	133.22	1	1	2		2	1	21680	42683	27718	0	5055600	2985300
1131	361	DLEALVTDK	9	0	1002.52	198.27	1				2	2	22387	0	0	0	1463600	1260000
1132	505	DLECVTNLQEVAR	13	0	1545.75	81.102					1	1	0	0	0	0	14886	126030
1133	497	DLEDSLAR	8	0	917.445	160.4	1	3	1	1	1	2	78910	2417400	0	103400	1608600	4878500
1134	965	DLEEAEEYK	9	0	1124.49	95.264					1	1	0	0	0	0	57588	100990
1135	914	DLEEDHACIPIK	12	0	1438.68	177.69					1	1	0	0	0	0	725620	310290
1136	449	DLEGLSQR	8	0	916.461	156.57	1	2	1	2	1	2	334630	2946000	440300	480930	238910	791790
1137	552	DLEGSDIDTR	10	0	1119.5	145.62	1	1			1	1	3037.9	253770	0	0	96609	68609
1138	476;595;1533	DLELQADSAIK	11	0	1201.62	217.97	3		1	3	3	3	1463600	0	59934	383560	7790400	22050000
1139	714	DLETSCSDIR	10	0	1194.52	178.3		1				1	0	143140	0	0	0	95788
1140	1092;1476	DLEVVEGSAAR	11	0	1144.57	171.61	2			1	1		219430	0	0	126000	781680	0
1141	1432	DLFNAIATGK	10	0	1048.56	149.47					2	1	0	0	0	0	889990	638750
1142	820	DLFTCTIK	8	0	996.495	87.387		1			1	1	0	27814	0	0	77653	133760
1143	1546	DLGAPQAAAEAELAAAQR	18	0	1751.88	164.71		1		1	2	2	0	22102	0	155240	154460	605460
1144	476;595;1533;449	DLGEELEALK	10	0	1115.57	167.37					2	1	0	0	0	0	20148000	35540
1145	1305	DLGEELEALR	10	0	1143.58	160.55					1		0	0	0	0	43912	0
1147	225	DLGGFDEDAEPR	12	0	1319.56	153.55					1	1	0	0	0	0	127350	57666
1148	332	DLGLAQDSATSTK	13	0	1305.64	94.056	1	1	1	1			82740	21662	18690	142080	0	0
1149	231	DLGLSESGEDVNAAILDESGK	21	0	2118	212.28					1	1	0	0	0	0	116290	253890
1150	749	DLGTESQIFISR	12	0	1364.69	92.244					1		0	0	0	0	0	0
1151	54	DLIADLK	7	0	786.449	97.808					1	1	0	0	0	0	345450	526100
1152	1578	DLIGVQNLLK	10	0	1111.66	140.39					1		0	0	0	0	601530	0
1153	1291	DLLDDLK	7	0	830.439	123.51					2	2	0	0	0	0	1841800	1455200
1154	1383	DLLEVPK	7	0	812.464	110.93					1		0	0	0	0	0	0
1155	1542;330	DLLLDPAWEK	10	0	1198.62	90.255					1		0	0	0	0	5162400	0
1156	119	DLLNTGGIQK	10	0	1057.58	92.852		1				1	0	15286	0	0	0	305290
1157	1422	DLLVQQASQCLSK	13	0	1488.76	170.81		1	1		1	1	0	113210	112250	0	13487	333320
1158	915	DLMACAQTGSGK	12	0	1237.54	92.421	1		1	1			73331	0	65368	62628	0	0
1159	1502	DLMSRSYCTSLAR	13	1	1558.72	104.67					1	1	0	0	0	0	8892.6	709340
1160	54	DLMTDLK	7	0	834.416	123.62		1			1	1	0	96645	0	0	510450	361220
1161	111	DLMVGDEASELR	12	0	1333.62	204.32					1	1	0	0	0	0	360870	600930
1162	1578	DLNSQADSLMTSSAFDTSQVK	21	0	2244.02	287.51					1	1	0	0	0	0	89839	212410
1163	1097	DLPELALDTPR	11	0	1238.65	167.77					1		0	0	0	0	470830	0
1164	293	DLPPDTTLLDLQNNK	15	0	1695.87	232.14	1	1	1	1	2	2	182650	25123	26841	380590	9455300	26008000
1165	1312	DLPVSEQQER	10	0	1199.58	157.34		1			1		0	198880	0	0	37429	0
1166	1071	DLQGVQNLLK	10	0	1126.63	118.37					1	1	0	0	0	0	142930	31395
1167	400	DLQNVNITLR	10	0	1184.65	214.76					2	1	0	0	0	0	471300	199220
1168	151	DLQQYQSQAK	10	0	1207.58	228.27		1	1	1	1	2	0	229760	61441	9791.8	0	303270
1169	223	DLQSNVEHLTEK	12	0	1411.69	128.06					1		0	0	0	0	248350	0
1170	854	DLQYSTDYTFK	11	0	1379.62	105.22						1	0	0	0	0	0	135940
1171	598	DLSLDDFK	8	0	951.455	117.52		1	1		1	1	0	9011.9	7658.2	0	2368100	2139700
1172	995	DLSLEEIQK	9	0	1073.56	78.258		1	1				0	208960	455690	0	0	0
1173	587	DLSQNFPTK	9	0	1048.52	134.35		1			1	1	0	170910	0	0	140910	277730
1174	1424	DLSSQLLK	8	0	902.507	100.76						1	0	0	0	0	0	96143
1175	1578	DLSSVQTLLTK	11	0	1203.67	224.51		1			1	2	0	1701.5	0	0	865790	968520
1176	626	DLSTIEPLK	9	0	1014.56	114.86					1	1	0	0	0	0	519830	699970
1177	863	DLSTVEALQNLK	12	0	1329.71	253.51		1			1	1	0	0	0	0	449370	432080
1179	277	DLTEYLSR	8	0	995.492	162.27					1	2	0	0	0	0	0	72392
1180	1448	DLTGFPGPLNDQDDEDCINR	20	0	2289.98	143.76					1	2	0	0	0	0	235320	1183800
1181	1578	DLTGVQNLR	9	0	1014.55	121.2		1				1	0	40550	0	0	0	1380500
1182	1167	DLTLDQAYSYAVENAK	16	0	1799.86	232.46		1			1		0	33884	0	0	222480	0
1183	1578	DLTNVQNLQK	10	0	1171.62	118.58	1	2	1	2			204440	174480	298910	261540	0	0
1184	487	DLTQTASSTAR	11	0	1149.56	163.39	1	1		2			67863	121020	0	60482	0	0
1185	1277	DLTSQFLK	8	0	950.507	97.914					1	1	0	0	0	0	417950	237050
1186	125	DLTSVMR	7	0	820.411	98.623		1			1	1	0	38243	0	0	231840	408200
1187	125	DLTSVNILLK	10	0	1114.66	75.256					1		0	0	0	0	220540	0
1188	1578	DLTSWVTEMK	10	0	1208.57	148.78			1		1		0	0	12842	0	81058	0
1189	635	DLTTAGAVTQCYR	13	0	1454.68	207	1	1	2	2	1	2	294270	602550	530200	650820	407480	421080
1190	1335	DLVGELGTALR	11	0	1142.63	129.83					1		0	0	0	0	31721	0
1191	198;619	DLYANNVLSGGTTMYPGIADR	21	0	2227.06	248.11	2				5	4	92715	0	0	0	30388000	840900
1193	1419	DLYDAGVK	8	0	879.434	98.398	1		1	1	1	1	4021.7	0	170720	19036	1486600	2755200
1194	1156	DLYLENPEIK	10	0	1232.63	136.13					1	1	0	0	0	0	0	1732000
1195	939	DMAAVQR	7	0	789.38	113.93	2	1	3	2	1	1	24667000	1179800	188120	3819100	1965600	7925800
1196	1351	DMAQLPETEIAPAK	14	0	1512.75	156.89	1		1	1			100100	0	67766	159880	0	0
1197	1578	DMDDEESWIK	10	0	1266.51	164.24					1	2	0	0	0	0	613220	816550
1198	603	DMDLYSYR	8	0	1061.45	125.55					1	1	0	0	0	0	129640	39481
1199	631	DMEESIR	7	0	878.38	113.16		2	1	1			0	229960	33137	99061	0	0
1200	698	DMFPGPYPR	9	0	1078.49	100.99					1		0	0	0	0	242150	0
1201	1245	DMGGYSTTTDFIK	13	0	1434.63	115.27					1	1	0	0	0	0	202400	118660
1202	864	DMNEVETQFK	10	0	1239.54	138.58		1	1	1	1	1	0	207900	167580	146820	17050	96079
1203	852	DMNQTLGDNITVK	13	0	1447.7	110.28						1	0	0	0	0	0	1135200
1204	1167	DMNQVLDAYENK	12	0	1438.64	201.49		2			1	2	0	100950	0	0	1096600	445310
1205	659	DMSGTMGFNEFK	12	0	1362.56	145.75		1		1	2	2	0	19423	0	7186.1	1812200	629290
1206	144	DMTSEQLDDILK	12	0	1406.66	153.19		1		1	2	1	0	34601	0	22026	1082000	790210
1207	1518	DMVGIAQTGSGK	12	0	1162.57	94.547		1					0	110780	0	0	0	0
1208	1390	DNAGAATEEFIK	12	0	1264.59	126.5	1	1	1	1			27414	73430	43910	103070	0	0
1209	1579	DNAMLEYLK	9	0	1095.53	132.91				1	1	1	0	0	0	8131.3	664540	758410
1210	520	DNCCILDER	9	0	1193.48	208.9	2	3	1	1	1	1	682570	5074800	935500	414380	567470	5332300
1211	1197	DNDGWLTSDPR	11	0	1274.55	228.52		2	3	1	1	2	0	12807000	1771400	61013	4087500	12772000
1212	397	DNDLISLPK	9	0	1013.54	140.55					1	1	0	0	0	0	650540	1246400
1213	536	DNELLVYK	8	0	992.518	203.27		1			1	1	0	32930	0	0	430580	403230
1214	1197	DNENVVNEYSSELEK	15	0	1767.78	334.43	2	2	3	2	2	1	1705400	11707000	2126900	1959000	2066000	6563900
1215	108	DNETLAELK	9	0	1031.51	176.03	1	1	1	1		1	26151	336390	65428	114210	0	42221
1216	707	DNFTAIPEGTNGVEER	16	0	1747.8	149.95	1	1	1	1	1	2	631340	87619	24299	139520	267690	915420
1217	1234	DNGNGTYSCSYVPR	14	0	1588.66	89.549						1	0	0	0	0	0	494850
1218	1415	DNIQGITK	8	0	887.471	196.99	2	4	3	3	1	1	5392500	45047000	18716000	24622000	11231000	324750
1219	1415	DNIQGITKPAIR	12	1	1324.75	208.64					2	1	0	0	0	0	2634500	17829000
1220	1393	DNLAEDIMR	9	0	1075.5	156.88	1	1	2	2	3	3	62060	54777	184120	26536	19689000	23063000
1221	1426	DNLLDDLQR	9	0	1100.55	235.26	1	2	2	1	3	3	748340	75175	47087	33448	35082000	33781000
1222	32	DNLTLWTSDMQGDGEEQNK	19	0	2179.93	183.01					1	1	0	0	0	0	136220	244300
1223	490	DNLTLWTSDTQGDEAEAGEGGEN	23	0	2407.99	106.19	1	1			1	1	31277	34736	0	0	32382	196000
1224	82;174	DNNLLGK	7	0	772.408	103.79	1	2	2	1		1	260350	1892900	406650	192300	0	272400
1225	1249;1310	DNNLLGR	7	0	800.414	107.33	1	1	1	1			177430	229690	105280	255180	0	0
1226	1052	DNNQFASASLDR	12	0	1336.6	173.4	1	1	1	1			83450	155230	97457	254190	0	0
1227	1507	DNPGVVTCLDEAR	13	0	1444.66	233.38	1	1	1	1	1	2	388240	1190100	740760	834990	1237400	2507700
1228	1353	DNPLDPVLAK	10	0	1080.58	132.21		1					0	141430	0	0	0	0
1229	952	DNQLSEVANK	10	0	1116.54	177.53			1	1		1	0	0	15341	59280	0	278450
1230	1320	DNSTMGYMAAK	11	0	1187.5	81.5	1		1	1			72828	0	207910	83776	0	0
1231	1386	DNSTMGYMMAK	11	0	1247.5	84.521		1	1				0	86884	218950	0	0	0
1232	973	DNTNEIYSGK	10	0	1139.51	113.34	1	1	1	1			3507.8	186950	13480	132910	0	0
1233	233	DNVDDPTGNFR	11	0	1248.54	197.5	1	1	1	2	1	1	159660	366800	92458	228170	263760	374920
1234	1196	DNVEGFNCER	10	0	1238.5	151.01	1	1				1	70716	111340	0	0	0	185380
1235	526	DNVFDGLVR	9	0	1033.52	107.5			1		1	1	0	0	30489	0	196580	84306
1236	637	DNWEELYNR	9	0	1237.54	192.89			1		1		0	0	6387.1	0	138180	0
1237	1532	DNYPQSVPR	9	0	1074.51	127.58	1			1	1	1	109450	0	0	27622	304040	563140
1238	819	DPAAAPATGNK	11	0	1011.5	95.184		1	1	1			0	13880	5479.6	18864	0	0
1239	281	DPAEGDGAQPEETPR	15	0	1567.67	208.79		1					0	122580	0	0	0	0
1240	1604	DPAEGTPLEAAGTR	14	0	1383.66	119.66	1			1			211740	0	0	49012	0	0
1241	1432	DPASDQMQHWK	11	0	1341.58	83.486					1	1	0	0	0	0	133320	62023
1242	273	DPDAQPGGELMLGGTDSK	18	0	1786.8	247.45	1	1	1	1	1	2	113560	987480	422960	474590	895410	904150
1243	73	DPDMVQNTVSELIK	14	0	1587.78	131.34					1		0	0	0	0	315170	0
1244	880	DPDPDFSTVK	10	0	1119.51	94.976		1					0	38297	0	0	0	0
1245	1470	DPDPEFPTVK	10	0	1143.54	84.467						1	0	0	0	0	0	0
1246	1436	DPDPPYSVETPYGYR	15	0	1754.78	101.4						1	0	0	0	0	0	85612
1247	1111	DPEGLDISYSLR	12	0	1363.66	118.73					2	2	0	0	0	0	369090	429970
1248	68	DPEIYTDPEVFK	12	0	1451.68	143.66					1		0	0	0	0	332270	0
1249	658	DPELGLK	7	0	770.417	122.08		1		1			0	363480	0	99335	0	0
1250	337	DPGVLDR	7	0	770.392	161.36	2	2	2	2		1	884850	2752700	655710	667010	0	649130
1251	1029	DPIPYLPPLEK	11	0	1280.7	93.798					1		0	0	0	0	209840	0
1252	911	DPLAVDK	7	0	756.402	129.99	1	2	3	2	2	1	79177	1175700	126420	759020	500640	823310
1253	363	DPLNPIK	7	0	795.449	139.2		1	1	1	1		0	743200	194990	265150	96456	0
1254	612	DPNIVIAK	8	0	868.502	190.41	1	2	2	2			361780	1507700	910740	790450	0	0
1255	294	DPNNLFMVR	9	0	1104.54	93.04						1	0	0	0	0	0	0
1256	913	DPNNLLNDWSQK	12	0	1442.68	154.05					1	1	0	0	0	0	234790	171700
1257	206	DPNSPLYSVK	10	0	1118.56	124.96		1					0	71863	0	0	0	0
1258	818	DPNVVGQLAK	10	0	1039.57	105.32	1	2	1	1	1	1	350250	804220	554540	703140	467460	552390
1259	336	DPQALSEHLK	10	0	1136.58	148.56		1			1	1	0	14967	0	0	453290	213220
1260	679	DPQFQK	6	0	761.371	109.61		1					0	0	0	0	0	0
1261	1120	DPSASPGDAGEQAIR	15	0	1469.67	238.87	1	1	1	2	1	1	1458600	182040	44815	306520	961590	2860100
1262	309	DPSQIDNNEPYMK	13	0	1549.67	101.63		1	1	1			0	0	20525	87480	0	0
1263	44	DPSVVVR	7	0	770.429	103.4	1	1	1	1			98746	245560	10061	20646	0	0
1264	1453	DPVQEAWAEDVDLR	14	0	1641.76	208.34				1	2		0	0	0	5792.9	1590200	0
1265	1354	DPVSIEER	8	0	943.461	99.935				1			0	0	0	0	0	0
1266	1546	DQASQLLAGTEATLGHAK	18	0	1809.92	83.052					1		0	0	0	0	94475	0
1267	1106	DQEFTVDTR	9	0	1109.5	105.48				1			0	0	0	0	0	0
1268	1234	DQEFTVK	7	0	865.418	148.91		1			1	1	0	214320	0	0	717670	1696700
1269	508	DQGGELLSLR	10	0	1086.57	96.049					1	1	0	0	0	0	121590	88384
1271	1302	DQGTYEDYVEGLR	13	0	1543.68	224.54	1	1	1	1	3	4	296520	1019900	281730	183450	17901000	13188000
1272	184	DQIPSPGLMVFPK	13	0	1427.75	107.92			1		1		0	0	8263.2	0	252770	0
1273	621	DQIYDIFQK	9	0	1168.58	125.15					1	1	0	0	0	0	448500	28260
1274	714	DQLDETVNVEPLTK	14	0	1599.8	165.99		1	1	1		1	0	76154	30522	78836	0	90570
1275	554	DQLLLGPTYATPK	13	0	1415.77	174.27					1	1	0	0	0	0	1524600	586530
1276	1119	DQLLPPSPNNR	11	0	1249.64	132.15	1	1	1	1	1	1	1422000	248610	135030	588280	119510	1029900
1277	178	DQLPADECNK	10	0	1188.51	120.38		1		1			0	104170	0	48591	0	0
1278	140	DQLQEQLQALK	11	0	1312.7	167.78		1			1		0	8886.7	0	0	136180	0
1279	980	DQMQQQLNDYEQLLDVK	17	0	2106.99	249.6					1		0	0	0	0	266390	0
1280	1545	DQMYYNLLK	9	0	1186.57	130.27					1	1	0	0	0	0	116180	107040
1281	33	DQNESLDEEMFYK	13	0	1646.68	245.45					2		0	0	0	0	338070	0
1282	815	DQNVFVAQK	9	0	1047.53	179.31	1	3	1	2	1	1	2401600	2905100	164900	4556100	2980000	10115000
1283	269	DQTDDQVTIDSALATQK	17	0	1847.87	245.76	1	1	1	1	1	1	216960	232120	178410	273420	149810	134860
1284	1320	DQVANSAFVER	11	0	1234.59	222.07	1	1	1	1			509450	904510	1199200	1177800	0	0
1285	547	DQYELLCLDNTR	12	0	1538.7	150.52					1	1	0	0	0	0	365980	1356100
1286	756	DQYNLLK	7	0	892.465	87.484		1			1	1	0	79415	0	0	136060	145780
1287	728	DSADIESILALNPR	14	0	1512.78	100.72					1	1	0	0	0	0	538600	31368
1288	547	DSAHGFLK	8	0	873.434	123.89	1		1	1	1	2	60958	0	18482	26217	3837100	935530
1289	1201	DSAIGFSR	8	0	851.414	84.499		1	1				0	475070	163790	0	0	0
1290	1424	DSAIQQQVANLQMK	14	0	1572.79	139.38					1	1	0	0	0	0	107230	131100
1291	1094	DSAVNAICYGAK	12	0	1267.59	110.72		1					0	0	0	0	0	0
1292	305	DSAYPEELSR	10	0	1165.53	110.84	1	2	1	1	1	1	49024	266460	41359	156610	216190	245690
1293	244	DSCPLDCK	8	0	993.39	155.91	1	1	1	1			33415	318950	98670	129810	0	0
1294	1398	DSCQGDSGGPLVCK	14	0	1478.61	261	1	1	1	2	1	1	189990	232380	16756	465830	509740	565510
1295	1549	DSCVGSLVVK	10	0	1062.54	149.33	2	2	1	1	1	2	259780	1753000	316350	530340	659260	1752400
1296	1191	DSDEADLVLAK	11	0	1174.57	103.68		2	1	1	1	1	0	389440	132940	130600	9922.9	18849
1297	418	DSDLSHVQNK	10	0	1141.54	125.51		1					0	47340	0	0	0	0
1298	519	DSDWPFCSDEDWNYK	15	0	1962.74	175.66					1		0	0	0	0	218290	0
1299	1552	DSDYYNMLLK	10	0	1260.57	149.03					1		0	0	0	0	239290	0
1300	1321	DSEDIYNLK	9	0	1095.51	75.108	1	1	1	1			18001	157460	28906	197000	0	0
1301	379	DSEGVDIK	8	0	861.408	102.76	1	1					44566	84055	0	0	0	0
1302	756	DSEQVAELK	9	0	1017.5	130.7		1	1	1		1	0	216550	17817	107760	0	25172
1303	1000	DSFDIIK	7	0	836.428	118.88		1			1	1	0	33464	0	0	83365	128910
1304	1044	DSFPNFLACK	10	0	1197.55	193.21					2	1	0	0	0	0	449210	34397
1305	815	DSFQEVLR	8	0	992.493	174.86	1	1		1	2	2	46269	97184	0	53238	4693800	13948000
1306	547	DSGFQMNQLR	10	0	1194.55	300.99	1	1	1	2	1	2	134020	524980	218450	144230	0	7302900
1307	1082	DSHGVAQVR	9	0	967.484	88.634				1	1	1	0	0	0	95631	747320	250840
1308	682	DSILGEPGMGFK	12	0	1249.6	112.74		1	1		1	1	0	97792	78452	0	481110	155750
1309	112	DSIVHQAGMLK	11	0	1197.62	191.83	1		1		1	1	17851	0	9129.7	0	472930	239330
1310	745	DSLSDDVVK	9	0	976.471	75.927		1		1			0	265370	0	132260	0	0
1311	381	DSLSVNEFK	9	0	1037.5	163.38		1		1	1	1	0	215580	0	6570.1	354770	252760
1312	887	DSLYAQGK	8	0	880.429	146.31		1	1	1	1		0	111560	33691	43204	51915	0
1313	1466	DSPCQLEALK	10	0	1159.55	121.38	1	2	1	1	1	1	337710	328630	108190	320900	652390	1000700
1314	116;1584	DSPEDFVYQFK	11	0	1373.61	76.864					1		0	0	0	0	56884	0
1315	954	DSPSVWAAVPGK	12	0	1212.61	206.39		1	1	1	1	2	0	3264500	3294400	858050	5361900	29052000
1316	362	DSQDAGGFGPEDR	13	0	1349.55	115.71	1	1					146750	124240	0	0	0	0
1318	1280	DSQICELK	8	0	991.464	217.18		1	1	1			0	392090	7845.1	367170	0	0
1319	855	DSQTQAILTK	10	0	1103.58	152.53		1	1	1			0	124100	0	0	0	0
1320	1270	DSSGPANSTADLLK	14	0	1374.66	103.22	1			1			265450	0	0	113660	0	0
1321	1473;1555;1616	DSTYSLSSTLTLSK	14	0	1501.75	215.16	3	1	2	2	5	4	2185200	2496800	2299800	1846600	5727400	27795000
1323	1591	DSYVGEDAQSK	11	0	1197.52	93.402			1	1			0	0	481620	257600	0	0
1324	44	DTAAWTVGR	9	0	975.477	155.65		1					0	71679	0	0	0	0
1325	25	DTANWLEINPDTGAISTR	18	0	1972.95	108.72					1		0	0	0	0	116470	0
1326	365	DTDDVPMILVGNK	13	0	1415.7	155.68					1	1	0	0	0	0	864180	373290
1327	1566	DTDIASLQEELK	12	0	1360.67	187.7				1	1		0	0	0	7576.7	224790	0
1328	744	DTDSAITNCALSYK	14	0	1557.7	131.42	1					1	0	0	0	0	0	38079
1329	816	DTDSEEEIR	9	0	1092.46	208.41	1	1	2	1	1	1	340550	2416400	174030	1253000	398580	746800
1330	1202	DTDSINLYK	9	0	1067.51	126.57		1					0	323410	0	0	0	0
1331	443	DTEDVPMILVGNK	13	0	1429.71	163.3					1	1	0	0	0	0	698040	380400
1332	1478	DTEEEDFHVDQVTTVK	16	0	1890.85	194.07					3	1	0	0	0	0	1249300	15563
1333	1178	DTEITCSER	9	0	1109.47	145.97		1	1	1			0	69923	7213.6	77148	0	0
1334	257	DTEPLIQTAK	10	0	1114.59	98.637		1		1			0	516580	0	276540	0	0
1335	1183	DTEQTLYQVQER	12	0	1508.71	142.55			1			1	0	0	11478	0	0	263890
1336	1578	DTEQVDNWMSK	11	0	1351.57	200.11					1	1	0	0	0	0	312940	418230
1337	125	DTGNIGQER	9	0	988.457	104.54	1	2	2	1			13954	44835	18927	38798	0	0
1338	1569	DTICNQDER	9	0	1149.47	132.11	1	1	1	1			24469	22503	8406.4	19201	0	0
1339	1167	DTIEEHR	7	0	898.414	100.49		1	1				0	18640	3753	0	0	0
1340	1583	DTLAQLQDCFR	11	0	1365.63	111.31				1	1		0	0	0	24909	119610	0
1341	884	DTLFTAESGTR	11	0	1196.57	194.6	1	1	1	1	1	2	41578	24081	7624.9	64826	1350700	3897200
1342	1620;1332;1402;1573;1403;1362	DTLMISR	7	0	834.427	168.08	1	3	2	3	1	3	205760	1203200	328270	549060	14797000	19159000
1343	1375	DTLYEAVR	8	0	965.482	166.48		2			1	1	0	867240	0	0	703720	571120
1344	1511	DTNGSQFFITTVK	13	0	1456.72	176.31	1	1	1	1	2	2	16177	24288	46327	22329	1373200	557380
1345	842	DTPDEPWAFPAR	12	0	1400.64	119.88					1	1	0	0	0	0	300400	207000
1346	752	DTSASAVAVGLK	12	0	1117.6	103.85	1						2129900	0	0	0	0	0
1347	476;595	DTSITGELEK	10	0	1091.53	179.59	2	3	3	2	1	2	21066000	539620	137650	3607600	10348000	19328000
1348	1533	DTSITQGPSFAYGELEK	17	0	1841.87	293.61	1			1	2	1	109620	0	0	27679	278610	2565200
1349	1461	DTSVEDALER	10	0	1133.52	89.342		1					0	0	0	0	0	0
1350	97	DTTINEIEDTFR	12	0	1452.67	110.76					1		0	0	0	0	114550	0
1351	461	DTTVGTLSQR	10	0	1076.55	108.7		1	1			1	0	19940	13875	0	0	96635
1352	1583	DTVCSGVTGAANVAK	15	0	1448.69	111	1						0	0	0	0	0	0
1353	1583	DTVCSGVTGAVNVAK	15	0	1476.72	134.17	1						0	0	0	0	0	0
1354	896	DTVEVALEDK	10	0	1117.55	176.45	1		1			1	2203100	0	17419	0	0	129960
1355	1448	DTVIKPLLVEPEGLEK	16	1	1779	119.92					1		0	0	0	0	999640	0
1356	1583	DTVTTGLMGAVNVAK	15	0	1475.77	113.42					2	1	0	0	0	0	73631	264520
1357	1583	DTVTTGLVGAVNVAK	15	0	1443.79	108.1				1		1	0	0	0	149230	0	87446
1358	627	DTYIENEK	8	0	1010.46	116.87		2	1	2		1	0	315660	28378	161330	0	73203
1359	362	DVAEVDTVR	9	0	1002.5	104.3	2	2					115150	520650	0	0	0	0
1360	476;595;1533	DVASLSSQLQDTQELLQEETR	21	0	2389.16	354.11					2		0	0	0	0	11625000	0
1361	724	DVAYQYVK	8	0	984.492	100.34		1			1	1	0	564900	0	0	152670	75623
1363	987	DVDGLTSINAGR	12	0	1216.6	76.289	1		1				96602	0	107260	0	0	0
1364	553	DVDLEFLAK	9	0	1048.54	126.12					1		0	0	0	0	284580	0
1365	1196	DVDQNLMDR	9	0	1104.49	135.67	1	2	1	1	1	1	73297	118150	19120	61520	221150	276500
1366	1578	DVEDEETWIR	10	0	1290.57	152.22				1	1	2	0	0	0	10375	659840	542450
1367	1233	DVEDMFSR	8	0	997.418	109.87					1	1	0	0	0	0	62697	115440
1368	1404	DVEEGDEKFE	10	1	1195.49	145.05		1					0	186420	0	0	0	0
1370	637	DVFSPIGER	9	0	1018.51	83.76					1	1	0	0	0	0	290200	105420
1371	1469	DVGRPQPGR	9	1	980.515	86.433					1	1	0	0	0	0	477400	269960
1372	381	DVGSLDEK	8	0	861.408	97.004				1		1	0	0	0	83460	0	27299
1373	338	DVIEEYFK	8	0	1041.5	113.46					1	1	0	0	0	0	513880	37950
1374	1215	DVIELTDDSFDK	12	0	1395.64	170.8					1		0	0	0	0	533550	0
1375	1511	DVIIADCGK	9	0	989.485	93.496	2	3	2	2	2	2	29840	2129700	199060	992110	1704800	1167000
1376	449	DVLLQVDDER	10	0	1200.6	103.17						1	0	0	0	0	0	246350
1377	341	DVLVGADSVR	10	0	1029.55	85.74	1	1			1	1	4608.9	284320	0	0	318670	138020
1378	1593	DVMQGTDEHVVCK	13	0	1516.66	131.44					1	1	0	0	0	0	583040	474270
1379	175	DVNAAIAAIK	10	0	984.56	196.81		1	1		1	1	0	227140	150560	0	416790	460080
1381	920	DVNQQEFVR	9	0	1133.55	146.4	1	2			1	1	33262	804950	0	0	1637400	1029300
1382	364	DVNVNFEK	8	0	963.466	118.42	1	3	1	1	2	1	177740	909730	299190	620270	785040	792750
1383	133	DVQDSLTVSNEAQTAK	16	0	1704.82	141.68	1	1	1	1			59376	65296	31066	96813	0	0
1384	1297	DVQGTDASLDEELDR	15	0	1661.74	145.13	1	1	1	1		1	47637	152300	74473	75788	0	66963
1385	315	DVQMLQDAISK	11	0	1246.62	142.15					1	1	0	0	0	0	206990	82477
1386	414	DVQTALALAK	10	0	1028.59	164.28					1	1	0	0	0	0	833500	634680
1387	1321	DVSLLTQK	8	0	902.507	124.08		1	1	1			0	150390	7723.3	134960	0	0
1388	1578	DVTGAEALLER	11	0	1172.6	152.83						1	0	0	0	0	0	195590
1389	1201	DVTVLQNTDGNNNEAWAK	18	0	1987.92	225.71		1					0	195180	0	0	0	0
1390	1199	DVVICPDASLEDAK	14	0	1530.72	139.88	1	1	2	1	1	2	51019	74632	94007	408040	860560	1098500
1391	1199	DVVICPDASLEDAKK	15	1	1658.82	158.13					1	1	0	0	0	0	493590	398120
1392	1580	DVVQAYPEVR	10	0	1174.6	134.47	1	1	1	1			25945	234650	250660	224520	0	0
1393	303	DVVTAAGDMLK	11	0	1118.56	79.651					1	1	0	0	0	0	674320	437780
1394	605	DVYTGDALR	9	0	1008.49	81.225		3	1	1	1		0	922130	98098	133800	5357.5	0
1395	683	DWNSNQISK	9	0	1090.5	91.586					1	1	0	0	0	0	139490	245830
1396	749;240	DWNVDLIPK	9	0	1098.57	133.13					2		0	0	0	0	1265400	0
1397	1004	DWSQITAEVTSPK	13	0	1460.71	100.22						1	0	0	0	0	0	81244
1398	1397	DWYDVK	6	0	824.37	167.25		1			1	1	0	14474	0	0	146650	139970
1399	1496	DYAEVGR	7	0	808.372	136.07	1	2	2	2	1	1	347160	462550	54782	986500	236400	2024400
1400	210	DYDAMGSQTK	10	0	1114.46	137.4		1	1	1			0	58859	14388	16043	0	0
1401	1248	DYDSLAQPGFFDR	13	0	1529.68	183.1				1	2		0	0	0	17670	6278200	0
1402	519	DYEDQQK	7	0	924.382	146.35	1	1	1	1			21771	222790	20064	32887	0	0
1403	693	DYEEIGPSICR	11	0	1337.59	179.83		1	1	1	1	1	0	249220	78422	224730	659390	459210
1404	534	DYEEMASR	8	0	999.397	135.06		1				1	0	256990	0	0	0	71383
1405	547	DYELLCLDGTR	11	0	1353.62	211.54					3	1	0	0	0	0	2475500	88603
1406	330	DYETATLSDIK	11	0	1254.6	218.25		1	1	1	1	2	0	3350400	475120	176150	1273200	1735200
1407	1542	DYETATLSEIK	11	0	1268.61	262.21	1	1	1	1	1	3	94640	163380	45649	42631	6416400	3173300
1408	1355	DYFEEYGK	8	0	1049.43	144.88	1	1	1	1	1	2	36140	346980	234130	57585	488790	819580
1409	888	DYFEQYGK	8	0	1048.45	146.05		1	1	1	1	2	0	478250	313360	84008	1664400	1659300
1410	548	DYFMPCPGR	9	0	1141.47	152.28		2	1		1	2	0	61794	61858	0	1892600	4470500
1411	637	DYFNVPYPLPK	11	0	1351.68	121.96					1		0	0	0	0	236980	0
1412	1163	DYINLFSTK	9	0	1099.56	84.867					1		0	0	0	0	58641	0
1413	1424	DYIPVDQEELR	11	0	1375.66	102.99				1	1	1	0	0	0	3712.9	165190	238860
1414	618	DYIWNTLNSGR	11	0	1337.64	111.85					1		0	0	0	0	148820	0
1415	380	DYLALNEDLR	10	0	1220.6	149.53				1	1	1	0	0	0	13044	406260	443510
1416	1500	DYLLCDYNR	9	0	1230.53	136.4		1			1	2	0	16645	0	0	288930	321210
1417	979	DYNVTANSK	9	0	1010.47	145.89	2	3	2	1			832050	988610	369950	214640	0	0
1418	579	DYPDFSPSVDAEAIQK	16	0	1780.82	140.17		1	1			1	0	520780	212200	0	0	387920
1419	1382	DYPFHEEF	8	0	1082.43	107.52					1	1	0	0	0	0	307730	43086
1420	1432	DYPLIPVGK	9	0	1000.56	84.72					1	2	0	0	0	0	178270	470330
1421	1212;1625	DYQDLLQVK	9	0	1120.58	182.1	1	1			2	2	1315700	15624	0	0	3674800	8977800
1423	1537	DYSGQGVVK	9	0	951.466	128.56	1	1	2	2	1		153170	1254100	285720	821260	277020	0
1424	487	DYSLDEFEANK	11	0	1329.57	179.8					1	1	0	0	0	0	84127	119560
1425	1020	DYSVTANSK	9	0	983.456	138.66	1	2	1	1	1	1	79852	500240	162200	0	37902	131010
1426	1607	DYTQMNELQR	10	0	1296.58	123.52		1	1	1			0	203030	44909	124360	0	0
1427	1167	DYTSGAMLTGELK	13	0	1384.65	176.72		2	1		1	1	0	151780	70407	0	253070	165990
1428	842	DYVAPTANLDQK	12	0	1333.65	100.47					1	1	0	0	0	0	292520	511150
1429	513	DYVSQFEGSALGK	13	0	1399.66	298.71	1	3	1	2	2	3	232220	1696400	414600	323100	20740000	29187000
1430	518	DYWSTVK	7	0	897.423	99.409		1			1	1	0	97204	0	0	301380	165900
1431	1108	EAAEGLGSHER	11	0	1154.53	106.55					1		0	0	0	0	37965	0
1432	32	EAAENSLVAYK	11	0	1193.59	158	1	2	1	1	1	1	281610	3330600	823640	2104500	1551400	5617300
1433	1430	EAAEQDVEK	9	0	1017.46	96.537	1	1	1	1			13622	236670	32119	94167	0	0
1434	923	EAAGEGPALYEDPPDQK	17	0	1785.81	93.943	1	1	1	1			86080	134520	16515	109930	0	0
1435	87	EAAIVDPVQPQK	12	0	1293.69	96.328		1				1	0	67089	0	0	0	140400
1436	554	EAALGAGFSDK	11	0	1064.51	146.83					1	1	0	0	0	0	712490	767840
1437	497	EAALSTALSEK	11	0	1118.58	117.06	1	1	1	1	1	2	305320	1223800	647770	732770	8379	310070
1438	649	EAATQAQQTLGSTIDK	16	0	1660.83	124.52	1	1	1	1			65775	98205	89141	158560	0	0
1439	1204	EAAYHPEVAPDVR	13	0	1452.7	156.75					1	1	0	0	0	0	169090	498550
1440	842	EADGSETPEPFAAEAK	16	0	1647.73	143.13	1	1	1	1			75356	131940	36708	130310	0	0
1441	153	EADLAAQEEAAK	12	0	1244.59	166.15		1		1			0	38242	0	23459	0	0
1442	355	EAEGAPQVEAGK	12	0	1184.57	200.76		1	2	1	1	1	0	185730	31347	238530	263810	467270
1443	663	EAESSPFVER	10	0	1149.53	110.03		2	1	2	1	1	0	3149800	338200	197570	394430	412810
1444	783;1055	EAFNMIDQNR	10	0	1236.56	240.54	2	2	1	1	1	2	329660	336920	118300	94959	8276900	10427000
1445	1302	EAFQLFDR	8	0	1024.5	135.66					1	1	0	0	0	0	3675000	135860
1446	1120	EAFQPQEPDFPPPPPDLEQLR	21	0	2446.18	102.97					1		0	0	0	0	196280	0
1447	816	EAFSLFDK	8	0	955.465	115.55					1	1	0	0	0	0	3971700	931250
1448	1234	EAGAGGLAIAVEGPSK	16	0	1425.75	233.13	1	2	1	1	3	3	953770	478190	199100	178920	2155100	6626600
1449	896;1106	EAGAGGLSIAVEGPSK	16	0	1441.74	108.1	1	1				1	205610	21101	0	0	0	357700
1450	896	EAGDGVFECEYYPVVPGK	18	0	2014.9	147.37	1				1	1	25572	0	0	0	423400	923150
1451	299	EAGEQGDIEPR	11	0	1199.54	174.56			1	1			0	0	24232	48336	0	0
1452	1367	EAGGGGVGGPGAK	13	0	1012.49	92.101			1				0	0	13503	0	0	0
1453	668	EAIINLATQPK	11	0	1196.68	214.65						1	0	0	0	0	0	0
1454	628	EALENANTNTEVLK	14	0	1544.77	85.871	1	1	1	1			77075	49889	61990	102410	0	0
1455	1025	EALLQASR	8	0	886.487	99.874	1	2	2	2	1		88242	526870	535430	46446	37377	0
1456	1411	EALNSCNK	8	0	934.418	103.41		2	2	2			0	149830	83184	92479	0	0
1457	1607	EALPAPSDDATALMTDPK	18	0	1841.87	129.44		1	1	1			0	418950	277130	86716	0	0
1458	807	EALPGSGQAR	10	0	984.499	108.63			1	1		1	0	0	83568	167260	0	21812
1459	32	EALQDVEDENQ	11	0	1288.54	241.26	1	1	1	1	1	1	215580	172700	87696	382540	248740	426770
1460	447	EALQGVGDMGR	11	0	1131.53	137.11		2	1	1	2		0	278150	22495	180560	402220	0
1461	350	EALTYDGALLGDR	13	0	1392.69	115.94					1	1	0	0	0	0	892210	53437
1462	1411	EAMEDGEIDGNK	12	0	1306.53	150.92		1		1	1	1	0	1238100	0	740060	231750	339760
1463	1440	EANGLPIMESNCFDPSK	17	0	1907.84	96.341						1	0	0	0	0	0	114080
1464	410	EANQAINPK	9	0	983.504	148.49	1	1	1	1			6582.9	55542	32996	21286	0	0
1465	1578	EANQQQQFNR	10	0	1261.58	112.97	1	1	1				7150.4	30323	6582.9	0	0	0
1466	758	EAPVDVLTQIGR	12	0	1296.7	159.83	1		1	1	2	1	948400	0	18768	189460	2781700	479110
1467	362	EAQAVPATLPELEATK	16	0	1666.88	94.551					1	1	0	0	0	0	315340	470730
1469	1196	EAQQALGSAAADATEAK	17	0	1630.78	305.37				1	1	1	0	0	0	0	390180	1564800
1470	157	EAQQYSEALASTR	13	0	1452.68	212.05	1	1	1		2	1	131520	71174	59133	0	404360	461720
1471	818	EAQVYQAFK	9	0	1082.54	145.18		1			1	1	0	150650	0	0	342870	359610
1472	301	EASDIILTDDNFTSIVK	17	0	1879.94	188.31					1		0	0	0	0	171820	0
1473	133	EASDPQPEEADGGLK	15	0	1541.68	91.187		1					0	358050	0	0	0	0
1474	1104	EASFDGISK	9	0	952.45	83.565		1					0	176200	0	0	0	0
1475	1039	EASMVITESPAALQLR	16	0	1714.89	131.03					2		0	0	0	0	357180	0
1476	317	EASSVSDFNQNFEVPNR	17	0	1938.87	106.05		1	1			1	0	134660	62451	0	0	19815
1477	1131	EATNDDPWGPSGQLMGEIAK	20	0	2114.96	101.92					1		0	0	0	0	65377	0
1478	612	EATNPPVIQEEKPK	14	1	1578.83	176.52		1			1	1	0	321340	0	0	329890	290810
1479	1106	EATTDFTVDSR	11	0	1240.56	86.716		1	1	1			0	135580	24393	153540	0	0
1480	1234	EATTEFSVDAR	11	0	1224.56	183.07	1	1	2		1	2	1339400	360210	21038	0	2674600	4928800
1481	125	EAVCEVALDYK	11	0	1295.61	133.5			1		1	2	0	0	32022	0	205630	290580
1482	78	EAVLIDPVLETAPR	14	0	1521.84	158.71					1		0	0	0	0	977330	0
1483	738	EAYMGNVLQGGEGQAPTR	18	0	1876.87	202.34					1	1	0	0	0	0	439270	425230
1484	493	EAYPEEAYIADLDAK	15	0	1696.78	105.84				1	1		0	0	0	54540	105930	0
1486	1578	ECEDVMDWINDK	12	0	1552.62	86.132					1		0	0	0	0	123400	0
1487	485	ECYCPPDFPSALYCDSR	17	0	2135.84	169.52					1	1	0	0	0	0	246630	405640
1489	54	EDAQEIADTPSGDK	14	0	1474.64	165.88		1					0	176540	0	0	0	0
1490	1025	EDAVLEYLK	9	0	1078.55	85.201					1	1	0	0	0	0	861450	1394100
1491	1015	EDDLNSFNATDLK	13	0	1480.67	178.32		1	1	1	1	1	0	509470	190380	35058	605220	82574
1492	1117	EDDVGTGAGLLEIK	14	0	1415.71	151.15					1	1	0	0	0	0	327250	74465
1493	678	EDFDSLLQSAK	11	0	1251.6	84.338					1	1	0	0	0	0	183520	21637
1494	1197	EDGGGWWYNR	10	0	1238.51	124.23					1		0	0	0	0	73169	0
1495	562	EDGQEYAQVIK	11	0	1278.61	110.43	2	1	1	1	1	2	82123	255800	126680	170170	297240	405470
1496	416	EDIANLADEFK	11	0	1263.6	110.07					1		0	0	0	0	1890500	0
1497	1014	EDILENQFMDSR	12	0	1495.66	118.09			1		1		0	0	8149.9	0	107170	0
1498	1549	EDIPPADLSDQVPDTESETR	20	0	2213	127.92						1	0	0	0	0	0	163280
1499	1172	EDIQSVMTEIR	11	0	1319.64	127.39		1		1	1	1	0	80046	0	174080	187440	81733
1500	1024	EDITQSAQHALR	12	0	1367.68	233.72					1		0	0	0	0	232430	0
1502	94	EDLECLIQEQMK	12	0	1534.7	195.07					1		0	0	0	0	160240	0
1503	497	EDLQELNDR	9	0	1130.52	151.64		2	1	1	1	1	0	1140300	90991	956950	1802200	1737700
1504	653	EDLSPSITQR	10	0	1144.57	90.915						1	0	0	0	0	0	355380
1505	1603	EDPIGAGALYDYGR	14	0	1495.69	180.81					1	1	0	0	0	0	176670	74448
1506	504	EDPNLVPSISNK	12	0	1311.67	79.665					1	1	0	0	0	0	365130	357050
1507	456	EDPTVSALLTSEK	13	0	1388.7	160.29		1		1	1	2	0	162810	0	9240.6	1378500	1372000
1508	476;595;1533;449;1305	EDQSILCTGESGAGK	15	0	1550.69	187.81	1	2	1	1	2	1	8038500	1012400	359030	2311800	3951300	16490000
1509	1386;1320	EDQTEYLEER	10	0	1310.56	184.53	1	3	2	1	1	1	479870	3208600	524500	1514900	1403800	3209500
1510	1112	EDSLEAGLPLQVR	13	0	1425.75	99.735			1		1		0	0	7554	0	472780	0
1511	217	EDSNLTLQEK	10	0	1175.57	96.163		1		1	2		0	323280	0	414910	409970	0
1512	1209	EDSSSTEFVEK	11	0	1256.54	113.48		1	1	1			0	48660	5425.7	55163	0	0
1513	1396	EDTEEYNLR	9	0	1167.5	133.8	1	2		1	1	1	71716	1483700	0	67683	625060	774980
1514	1170	EDTIVSQTQDFTK	13	0	1510.72	130.82				1	1	1	0	0	0	27698	15900000	153900
1515	362	EEAAVDAQQQK	11	0	1215.57	95.932	1	1	1	1			13180	22848	3572.3	32097	0	0
1516	1426	EEAENNLAAFR	11	0	1262.59	150.54	1		1	1	1	2	1366900	0	4920.5	174920	61832000	85779000
1517	1393	EEAENTLQSFR	11	0	1322.61	241.18	2	1	1	1	2	2	555070	2946900	945320	2032000	50533000	62666000
1518	923	EEAPDILCLQETK	13	0	1544.74	214.95		1	1		1	1	0	7045.9	8534.5	0	1000700	708180
1519	663	EEASDYLELDTIK	13	0	1524.72	159.48		1	1	1	2	2	0	267600	129270	120350	1100600	1733200
1520	1073	EEASGSSVTAEEAK	14	0	1393.62	138.37		1	1	1			0	70130	22059	94952	0	0
1521	871	EEASNFR	7	0	851.377	92.219		1		1			0	8427	0	38566	0	0
1522	1405	EEDGSLSLDGADSTGVVAK	19	0	1848.86	116.83		1					0	0	0	0	0	0
1523	663	EEEAIQLDGLNASQIR	16	0	1784.89	140.86					1		0	0	0	0	259500	0
1524	499	EEEIAALVIDNGSGMCK	17	0	1834.84	290.17	1	1	1	2	1	1	2820.1	1043200	1554000	372710	3225600	5866600
1525	476;595;1533;449;1305	EEELQAALAR	10	0	1128.58	111.14					1	1	0	0	0	0	35692	314370
1526	266	EEFASTCPDDEEIELAYEQVAK	22	0	2572.12	192.08			1		1	1	0	0	30559	0	311750	195990
1527	997	EEFTSGGPLGQK	12	0	1248.6	91.472		1			1		0	86605	0	0	85634	0
1528	792	EEGEVPASAFQK	12	0	1290.61	110.67		1			1	1	0	76490	0	0	51597	416460
1529	54	EEGGENLDQAR	11	0	1216.53	103.55		1	1	1	1	1	0	862200	30335	384570	268620	43027
1530	1548	EEGGFEYK	8	0	957.408	86.449		1		1			0	256120	0	79963	0	0
1531	1452;986	EEHLCTQR	8	0	1071.48	115.53					1	1	0	0	0	0	164730	89028
1532	107	EEIIPVAAEYDK	12	0	1375.69	96.898					1	1	0	0	0	0	188590	416460
1533	217	EEIQSSISGVTAAYNR	16	0	1723.84	115.11	1	1				1	27056	62455	0	0	0	89842
1534	496	EEKPAVTAAPK	11	1	1139.62	99.977					1	1	0	0	0	0	107390	153700
1535	771	EELEELQEAFNK	12	0	1477.69	134.12					1		0	0	0	0	160430	0
1536	844	EELGQGLQGVEQK	13	0	1413.71	128.34			1	1	1	2	0	0	26003	135090	316090	334910
1537	95	EELTAVMR	8	0	947.475	94.58		1	1		1	1	0	59646	5284.7	0	2777800	2873000
1538	835	EESAASGGAAYTK	13	0	1240.56	125.86		1	1	1			0	22989	19131	43391	0	0
1539	541	EESPLLIGQQSTVSDVPR	18	0	1954	236.85	1	1	1	1	2	2	71992	220110	35454	18025	1190400	1259400
1540	383	EETGQVLER	9	0	1059.52	171.18	1	1			1	1	0	96936	0	0	165630	284520
1541	1120	EEVFDER	7	0	922.403	101.07	1				1	1	2989	0	0	0	489290	446190
1542	1212;1625	EEYGIQAEER	10	0	1222.55	138.41	2	1		1	1	1	77702	71275	0	17946	155340	213020
1543	1481	EFCENLSADCR	11	0	1399.55	111.87		1		1	1	1	0	63107	0	188930	182920	70929
1544	893	EFDELNPSAQR	11	0	1304.6	96.617		1	1				0	290790	134210	0	0	0
1545	355	EFDPTITDASLSLPSR	16	0	1747.86	191.63	1	1	1	1	1	1	96576	37448	20407	19475	3309700	4045700
1546	1164	EFEFSQLPLK	10	0	1236.64	183.07					1		0	0	0	0	131990	0
1547	1538	EFGATECINPQDFSK	15	0	1741.76	206.84				1	2	1	0	0	0	78829	1806400	1959600
1548	516	EFGNTLEDK	9	0	1051.48	106.05		1			1	1	0	2044600	0	0	1187100	501710
1549	24	EFNAEVHR	8	0	1000.47	115.62				1	1		0	0	0	33494	485340	0
1550	911	EFPGFLENQK	10	0	1207.59	134.01			1		3	1	0	0	15170	0	2797300	186980
1551	872	EFPGLAGVK	9	0	916.502	130.36					1	1	0	0	0	0	1737000	740300
1552	1347	EFPTVPLVK	9	0	1028.59	75.311					1	1	0	0	0	0	791560	1177900
1553	194	EFSPFGTITSAK	12	0	1283.64	110.89					1	1	0	0	0	0	641250	493190
1554	1517	EFTAQNLGK	9	0	1006.51	74.781		1	1	1			0	45799	134880	106610	0	0
1555	400	EFTEAVEAK	9	0	1022.49	88.345		2	2	2	1	1	0	652260	31708	314400	750200	740160
1556	939	EFTESQLQEGK	11	0	1294.6	324.88	2	2	1	1	2	2	29959000	2831700	155190	5814000	30028000	56175000
1557	1067;1479	EFTPEVQASWQK	12	0	1448.69	212.45		1			2	1	0	25722	0	0	443630	2997800
1558	1520	EFTPPVQAAYQK	12	0	1377.69	265.3	2	3	2	2	3	7	26437000	193180000	75239000	128750000	218850000	1298000
1559	1443	EFTPQMQAAYQK	12	0	1440.67	311.51	1	1	1	1	1	1	1635000	4902000	1322000	12360000	27477000	25767000
1560	576	EGAAGSPGGPR	11	0	954.452	86.123	1	1		1	1		54972	5527.8	0	17558	8814.6	0
1561	914	EGALCEENMR	10	0	1207.5	144.04	1	2	1	2	1	1	164820	1834600	122970	555410	433160	385330
1562	1422	EGCTEVSLLR	10	0	1162.57	81.345					1		0	0	0	0	300540	0
1563	497	EGDLIAAQAR	10	0	1042.54	228.9	1	4	3	2	1	1	304240	2749600	399890	1938500	3344800	5026400
1564	838	EGDVLTPEQAR	11	0	1213.59	93.795		1				1	0	185550	0	0	0	74886
1565	315	EGEEAGPGDPLLEAVPK	17	0	1706.84	130.89					1		0	0	0	0	174090	0
1566	222	EGELTVAQGR	10	0	1058.54	132.27		2	1	2	1	1	0	1574600	99560	380790	382410	583140
1568	892	EGGSIPVTLTFQEATGK	17	0	1733.88	92.694			1	1	1	1	0	0	97022	35411	229430	380550
1569	899	EGIPPDQQR	9	0	1038.51	100.03	4	4	4	2	1	1	440160	2592600	852720	2187200	68871	302820
1570	1386;1320	EGLELPEDEEEK	12	0	1415.63	85.583		1	1	1	1		0	1194900	885200	199030	9307.4	0
1571	362	EGLTSIEEVTK	11	0	1204.62	124.11						1	0	0	0	0	0	559240
1572	1212;1625	EGLWAEGQAR	10	0	1115.54	173.64					1	1	0	0	0	0	1540500	521320
1573	691	EGMAALQSDPWQQELYR	17	0	2020.93	203.92					1		0	0	0	0	149220	0
1574	1614	EGMNIVEAMER	11	0	1277.57	91.563					1	1	0	0	0	0	17509000	2157700
1575	220	EGNAIFTFPNTPVK	14	0	1533.78	149.33		1			2	1	0	18261	0	0	2265700	127120
1576	937	EGNGTVMGAELR	12	0	1232.58	114.29	1	1		1	1	1	526850	886320	0	211290	8203100	13113000
1577	666	EGNPEEDLTADK	12	0	1316.57	108.63	1	2	1	2	1	1	249210	2206600	185960	350960	116320	285680
1578	1199	EGPYDVVVLPGGNLGAQNLSESAAVK	26	0	2583.32	153.49					1	2	0	0	0	0	177760	791910
1579	1234	EGPYSISVLYGDEEVPR	17	0	1908.91	161.66					2		0	0	0	0	856390	0
1580	902	EGQEDQGLTK	10	0	1103.51	88.039	1	1	1	1			21436	251770	106700	85799	0	0
1581	1212	EGQGGPGSVSVDVK	14	0	1314.64	124.14	1			1	1	1	1574600	0	0	86425	0	843970
1582	1189	EGSPVLLNCLMYK	13	0	1522.75	90.428					1	1	0	0	0	0	104390	7342.5
1583	1111	EGSQELNPAK	10	0	1071.52	86.748	1	1	1	1			10122	72687	9593	95245	0	0
1584	547	EGTCPEAPTDECKPVK	16	1	1816.8	174.04					1	1	0	0	0	0	399140	642270
1586	86	EGVECEVINMR	11	0	1334.6	117.05					1	1	0	0	0	0	429180	157030
1587	954	EGVHGGLINK	10	0	1022.55	133.72	1	1	1	1	1	1	67841	29416	57522	51320	6234200	1056700
1588	1118	EGVVECSFVK	10	0	1152.55	81.694					1	1	0	0	0	0	9184000	2514200
1589	422	EGVYTVFAPTNEAFR	15	0	1699.82	103.5					1		0	0	0	0	234440	0
1590	416	EGWPLDIR	8	0	984.503	91.751					1	1	0	0	0	0	378290	42648
1591	547	EGYYGYTGAFR	11	0	1282.56	122.12		1	1		2	1	0	10868	7668.1	0	3834900	920930
1592	416	EHAALEPR	8	0	921.467	122.09		1		1	1	1	0	141560	0	88872	186650	63809
1593	1424	EHINSVSAMK	10	0	1114.54	79.163					1	1	0	0	0	0	87313	89282
1594	232	EIADGLCLEVEGK	13	0	1431.69	132.25					1		0	0	0	0	186950	0
1595	82	EIAEAYLGK	9	0	992.518	106.05		2	1		1	2	0	3755200	691390	0	5667300	5994300
1596	333	EIAENALGK	9	0	943.497	81.176		1		1			0	23961	0	180960	0	0
1597	874	EIAQDFK	7	0	849.423	137.05	2	3	1	2			2741600	53125000	12177000	7251500	0	0
1598	125	EIEELQSQAQALSQEGK	17	0	1886.92	169.02	1		1	1		1	43901	0	72930	208640	0	169260
1599	476;595;1533	EIENLTQQYEEK	12	0	1522.72	230.16	1	1	1	1	1	2	2294300	338150	103060	2639300	4593700	7267700
1600	654	EIEQEAAVELSQLR	14	0	1613.83	131.98					1		0	0	0	0	292520	0
1601	216	EIETNLR	7	0	873.456	86.007						1	0	0	0	0	0	0
1602	41	EIEVPDQYGTIR	12	0	1418.7	87.049					1		0	0	0	0	174310	0
1603	978	EIFEQPESVVNTMR	14	0	1677.8	192.04					2	1	0	0	0	0	360420	142640
1604	397	EIGELTQLK	9	0	1029.57	102.46		1			1	2	0	367070	0	0	541360	1368700
1605	1477	EIGELYLPK	9	0	1060.58	95.609					1	1	0	0	0	0	312310	106070
1606	187	EIGGDVQK	8	0	844.429	152.36	2	2	1	1	1	1	120580	461850	68048	247300	76134	602540
1607	1551	EIGNIISDAMK	11	0	1189.6	179.29					1	1	0	0	0	0	4585800	47880
1608	125	EIGQSVDEVEK	11	0	1231.59	76.548					1	1	0	0	0	0	346730	692690
1609	175	EIIDPVLDR	9	0	1068.58	111.58				1	1	1	0	0	0	8764.9	933040	542880
1610	1212	EIIFQGPISAAGK	13	0	1329.73	162.12					1		0	0	0	0	369500	0
1611	1278	EIISHDTR	8	0	969.488	121.09					1		0	0	0	0	0	0
1612	600	EILGTAQSVGCNVDGR	16	0	1674.8	173.02		1	1	1	1	2	0	384220	379650	578100	762530	449410
1613	476;595;1533	EILLQVEDER	10	0	1242.65	122.98				1	2		0	0	0	10522	10213000	0
1614	1117	EILSEVER	8	0	973.508	103.16		1			1	1	0	92726	0	0	293580	201100
1615	1122	EILSVDCSTNNPSQAK	16	0	1761.82	189.95	1	1	1	1	1	1	126200	96534	47609	141400	404500	809980
1616	993	EIPVTVYKPIIK	12	1	1398.85	82.925					1		0	0	0	0	202670	0
1617	125	EIQGHQPR	8	0	963.489	91.246					1	1	0	0	0	0	78325	78726
1618	1122	EIQNAVNGVK	10	0	1070.57	162.34		1	1	2	2	2	0	248150	19629	144730	153790	453030
1619	469	EIQTAVR	7	0	815.45	114.39	2	3	3	1	1	1	4193200	2291700	7060900	4834500	82798	26551000
1620	260	EISPDTTLLDLQNNDISELR	20	0	2285.14	215.77					1		0	0	0	0	828480	0
1621	379	EISPGSGPGEIR	12	0	1197.6	112.07		1			1	1	0	222180	0	0	186570	362620
1623	1566	EITSLQNSFQLR	12	0	1434.75	106.55					1		0	0	0	0	141110	0
1624	1252	EIVESCDLK	9	0	1091.52	78.688		1		1			0	222760	0	6077.1	0	0
1625	1575	EIVLTQSPATLSLSPGER	18	0	1897.02	169.24		1		1	2	1	0	17899	0	21861	657260	1108200
1626	1344	EIVLTQSPGTLSLSPGER	18	0	1883	246.58		1	2	1	3	2	0	48002	169350	37617	1584400	3833200
1627	1328	EIVMTQSPATLSVSPGER	18	0	1900.96	185.84					3	1	0	0	0	0	358890	615140
1628	1003	ELAEDDSILK	10	0	1131.57	91.905		1					0	88871	0	0	0	0
1629	274	ELAEDGYSGVEVR	13	0	1422.66	191.74	1	1	1	1		2	27438	0	187220	48782	0	284000
1630	362	ELAEQELEK	9	0	1087.54	183.5		1		1			0	557390	0	26193	0	0
1632	658	ELAMPGEDLK	10	0	1101.54	79.844		1	1			1	0	106920	71402	0	0	27334
1633	362	ELAQEQAR	8	0	943.472	112.46	1	1	1	1			30133	103450	18278	48414	0	0
1634	621	ELAQQIQK	8	0	956.529	151.09	1	2	2	1	1	2	14245	2903900	384730	816520	557600	938830
1635	1518	ELAQQVQQVADDYGK	15	0	1690.82	168.15					1	1	0	0	0	0	84882	229350
1636	215	ELAVQIQK	8	0	927.539	92.003						1	0	0	0	0	0	33520
1637	1466	ELCQGLGQPGSVLR	14	0	1512.77	162.11					1	1	0	0	0	0	1902000	1241600
1638	1580	ELDALDANDELTPLGR	16	0	1740.85	87.619					1		0	0	0	0	217500	0
1639	476;595;1533	ELDEATESNEAMGR	14	0	1550.65	265.89	3	2		2	1	3	1641800	62860	0	221480	6069900	14088000
1640	1122	ELDESLQVAER	11	0	1287.63	169.48	1	1			1	1	59994	592310	0	0	0	1035600
1641	617	ELDSLNSDR	9	0	1047.48	75.538		1	1	1			0	196200	6447.6	54551	0	0
1642	343	ELDSLQTEAESLDNTVK	17	0	1890.91	155.19		1				1	0	23176	0	0	0	527330
1643	282	ELDTVTLEDIK	11	0	1274.66	93.162						1	0	0	0	0	0	91849
1644	1383	ELDVVDPDGSVPVGLR	16	0	1665.86	184.05					1		0	0	0	0	550640	0
1645	449	ELEDATETADAMNR	14	0	1564.67	227.3	1	1	2	1	2	2	448600	1011700	217640	464860	550840	2387200
1646	222	ELEEAMAGER	10	0	1133.5	108.02		1	1		1	1	0	236740	4219	0	261890	576020
1647	1182	ELEEETGYK	9	0	1096.49	109.63		1		1	1		0	237320	0	120870	78567	0
1648	445	ELEEEVNNFQK	11	0	1377.64	93.965					1	1	0	0	0	0	271170	396500
1649	65	ELEEIVQPIISK	12	0	1396.78	202.38		1	1	1	2	2	0	52593	67341	25883	4239900	904270
1650	318	ELEEQFALEAGGYQAGAAR	19	0	2008.95	137.79					1		0	0	0	0	57214	0
1651	1566	ELENQVGSLK	10	0	1115.58	88.329					1	1	0	0	0	0	199000	642580
1652	449	ELESQISELQEDLESER	17	0	2032.94	245.98					1		0	0	0	0	513520	0
1653	917	ELESQVSGLEK	11	0	1217.61	89.681		1		1			0	338140	0	411640	0	0
1654	531	ELFSNLQEFAGPSGK	15	0	1622.79	116.21					2		0	0	0	0	239570	0
1655	1445;1429	ELGATECINPQDYK	14	0	1636.74	251.75	1	2	2	1	1	2	216580	808270	290330	6281400	5023600	5478600
1656	148	ELGEYGLQAYTEVK	14	0	1598.78	120.7					1		0	0	0	0	351960	0
1657	1117	ELGIWEPLAVK	11	0	1253.7	126.67					1		0	0	0	0	115210	0
1658	706	ELGLPEELVSR	11	0	1240.67	94.746					1		0	0	0	0	158380	0
1659	1184	ELGSECGIEFDEEK	14	0	1640.69	107.9					1	1	0	0	0	0	59248	250000
1660	179	ELGVGIALR	9	0	926.555	124.13					1		0	0	0	0	297430	0
1661	293;260	ELHLDNNK	8	0	981.488	141.53					1	1	0	0	0	0	5249700	3828300
1662	1566	ELIEAQELAR	10	0	1170.62	162.87					1	2	0	0	0	0	354630	477470
1663	362	ELIPTEEALR	10	0	1169.63	85.093					1	1	0	0	0	0	218020	353240
1664	663;1386	ELISNASDALDK	12	0	1274.64	166.39	1	1	1	1	1	1	265470	15182000	4849900	1628800	3994200	3315800
1665	1320	ELISNSSDALDK	12	0	1290.63	139.61		2	1	1	2	1	0	4175900	2292500	2594700	1860100	4457800
1666	138	ELLDTVTAPQK	11	0	1213.66	92.188						1	0	0	0	0	0	604950
1667	451	ELLESYIDGR	10	0	1193.59	81.06					1		0	0	0	0	172630	0
1668	1337	ELLLQPVTISR	11	0	1267.75	139.26					2	1	0	0	0	0	1110300	159640
1669	894	ELLNVTPEDWDFCCK	15	0	1924.83	83.135	2						0	0	0	0	0	0
1670	1081	ELLTLDEK	8	0	959.518	92.771		1		1		1	0	131350	0	8182.3	0	159150
1671	754	ELLTSFGPLK	10	0	1103.62	96.534					1	1	0	0	0	0	156570	18303
1672	783;1055	ELLTTMGDR	9	0	1034.51	123.96	1	2	1	1	1	2	204210	113420	112640	41320	23298000	21938000
1673	1486	ELPEHTVK	8	0	951.503	95.536		1		1	1	1	0	5793700	0	15124	418240	30200
1674	406	ELPGFLQSGK	10	0	1074.57	92.26					1	1	0	0	0	0	221390	107360
1675	815	ELPNIEER	8	0	998.503	118.65		1			1	1	0	1992100	0	0	9096300	17605000
1676	1542;330	ELPPDQAEYCIAR	13	0	1560.72	121.7	1	1	1	1	3	4	224220	375490	183670	588370	924840	1343700
1677	20	ELPPGVEELLNK	12	0	1336.72	80.035					1		0	0	0	0	124560	0
1678	1482	ELPQFATGENLPR	13	0	1470.75	115.94		1	1		1	2	0	26556	31884	0	220990	204160
1679	815	ELPSLEQK	8	0	942.502	105.06	1		1	1			256900	0	195730	193920	0	0
1680	651	ELPVNAQNYVR	11	0	1301.67	117.26					1	1	0	0	0	0	132300	216580
1681	514	ELQAAQAR	8	0	885.467	88.884	1		1		1	1	20100	0	38699	0	34812	73540
1682	525	ELQAEQEDR	9	0	1116.5	102.95				1			0	0	0	0	0	0
1683	1112	ELQDLALQGAK	11	0	1184.64	159.33				1	1	1	0	0	0	0	377880	165130
1684	80	ELQEMDKDDESLIK	14	1	1691.79	174.79					1		0	0	0	0	262770	0
1685	130	ELQNEVEK	8	0	987.487	103.5	1	1	1				16017	330400	42053	0	0	0
1686	623	ELQPSEEVTWK	11	0	1344.66	171.86					1	1	0	0	0	0	351860	177660
1688	1579	ELSEQIQR	8	0	1001.51	112.73	1	3	1	1		1	222980	583810	147040	315400	0	10399
1689	1466	ELSLAGNELGDEGAR	15	0	1529.73	252.33			1		2	2	0	0	60101	0	1145700	1798900
1690	267	ELSNTAAYQSVR	12	0	1337.66	102.17		1				1	0	115900	0	0	0	238780
1691	61	ELSTTLNADEAVTR	14	0	1518.75	89.979		1	1	1		1	0	143230	131160	129370	0	56485
1692	274	ELTAVVQK	8	0	886.512	100.38		1	1		1		0	626520	6752	0	429800	0
1693	1474	ELTDEEAER	9	0	1090.48	102.07		1	1	1			0	188220	14715	71686	0	0
1694	1120	ELTPQVVSAAR	11	0	1169.64	185.36	1	1	1		1	2	1373300	0	380320	0	2457300	5504900
1695	61	ELTSTCSPIISK	12	0	1334.68	148.85	1	2	1	1	2	1	100080	274960	284160	104370	436150	386640
1696	1466	ELTVSNNDINEAGVR	15	0	1629.8	221.39	1	1	1	1	2	1	141470	92695	53329	209000	255230	135190
1697	626	ELVLDNSR	8	0	944.493	105.11					1		0	0	0	0	253130	0
1698	396	ELVNNLGEIYQK	12	0	1418.74	128.54					1	1	0	0	0	0	321800	120390
1699	1481	ELVSDANQHVK	11	0	1238.63	120.91					1	1	0	0	0	0	264880	154080
1700	1506	ELVYPPDYNPEGK	13	0	1519.72	121.15					1	1	0	0	0	0	465420	919120
1701	26	ELWFSDDPNVTK	12	0	1449.68	125.67					1		0	0	0	0	362850	0
1702	362	ELYQQLQR	8	0	1076.56	95.936					1	1	0	0	0	0	96528	319830
1703	1339	EMDEAATAEER	11	0	1250.51	141.79		1		1			0	134460	0	74145	0	0
1704	1049	EMDQTMAANAQK	12	0	1336.58	140.75		1		1			0	285460	0	178090	0	0
1705	449	EMEAELEDER	10	0	1249.51	121.54					1	1	0	0	0	0	399690	493140
1706	1393	EMEENFAVEAANYQDTIGR	19	0	2185.96	295.65				1	1	2	0	0	0	14184	844250	1990800
1707	331	EMQENDASMR	10	0	1209.48	126.34		1	1	1			0	83567	18831	149260	0	0
1708	604	EMQNLSFQDCYSSK	14	0	1735.72	101.55			1			1	0	0	56090	0	0	79448
1709	490;419;946	EMQPTHPIR	9	0	1107.55	129.9				1	1	1	0	0	0	6305.8	1935200	347250
1710	1388	EMSGSPASGIPVK	13	0	1258.62	126.29	1	1			1	1	0	177650	0	0	164840	1075700
1711	280	EMVECFNK	8	0	1055.44	105.13		2	2	2			0	280240	148070	121850	0	0
1712	476;595;1533	ENADLAGELR	10	0	1086.53	132.85		2	1		1	2	0	683180	103120	0	19130000	29228000
1713	1189	ENDYYTPTGEFR	12	0	1490.63	159.54					1	1	0	0	0	0	487220	286690
1714	1549	ENEGFTVTAEGK	12	0	1280.59	130.92					1	1	0	0	0	0	571240	286840
1715	773	ENFLFLTPDCK	11	0	1382.65	163.94					1		0	0	0	0	154350	0
1716	1469	ENFQNWLK	8	0	1077.52	97.726	1				2		40151	0	0	0	3847600	0
1717	1599	ENFSCLTR	8	0	1025.46	109.33	1	2	1	1	1	2	49649	561170	128120	23495	1416900	2382300
1718	755	ENGLPLEYQEK	11	0	1318.64	89.534		1	1			1	0	139000	57287	0	0	209490
1719	1234	ENGVYLIDVK	10	0	1148.61	76.071					1	1	0	0	0	0	296450	99055
1720	292	ENILEEFSK	9	0	1107.54	75.605					1	1	0	0	0	0	190110	114920
1721	1062	ENLATVEGNFASIDER	16	0	1763.83	107.92					1		0	0	0	0	132320	0
1722	613	ENLISALEEAK	11	0	1215.63	79.954					1		0	0	0	0	175290	0
1723	1578	ENLLEEQGSIALR	13	0	1470.77	178.32					1	1	0	0	0	0	365610	26831
1724	1254	ENMAYTVECLR	11	0	1384.61	100.37					1	1	0	0	0	0	286360	79417
1725	1579	ENPLQFK	7	0	874.455	89.815		1		1	1	1	0	109470	0	17199	59953	148730
1726	578	ENPYYDSR	8	0	1042.44	102.07		1	1	1	1	1	0	196630	11507	47440	65543	115860
1727	354	ENQWLGVSVR	10	0	1186.61	80.187					1		0	0	0	0	22804	0
1728	1283	ENQYALR	7	0	892.44	93.845	1	1	1			1	67124	163520	13601	0	0	659480
1729	441	ENSETVVTGSLDDLVK	16	0	1704.84	89.884						1	0	0	0	0	0	0
1731	661	ENSSNILDNLLSR	13	0	1473.74	114.35		1				1	0	15029	0	0	0	560670
1732	1277	ENTQPFVVLPK	11	0	1270.69	77.881					1	2	0	0	0	0	170420	312000
1733	692	ENTQQHITAR	10	0	1196.59	231.8					1	1	0	0	0	0	259710	396780
1734	1566	ENVLLSSELQR	11	0	1286.68	116.5					2	2	0	0	0	0	322620	400890
1735	1455	EPALNEANLSNLK	13	0	1411.73	120.14	1	1	1	1	1	2	26636	1225900	899750	156260	1723000	2418500
1736	572	EPIMPAPGQEETVR	14	0	1552.76	118.47					1	1	0	0	0	0	703970	1192800
1737	1620;1332;1402;1573;1403;1362	EPQVYTLPPSR	11	0	1285.67	100.83	1	2	2	1		2	4943500	3897300	2911100	4603500	0	51476
1738	1305	EQADFALEALAK	12	0	1304.66	80.648			1		2		0	0	27803	0	786980	0
1739	476;595;1533	EQADFAVEALAK	12	0	1290.65	181.29	1	1	1	1	3	1	735350	19234	47419	132330	11053000	21033000
1740	1452;986	EQAEAEVASLNR	12	0	1315.64	136.8	1		1	1	1	1	352800	0	29135	845320	1784600	1723200
1741	964	EQALQLAQK	9	0	1027.57	78.069		2	1	1	1		0	138790	27308	186900	35957	0
1742	1175	EQCEQLEK	8	0	1062.47	114.19	1	1	2	1	1		8647.7	43014	25065	61972	30751	0
1743	882	EQDAAQTDGLR	11	0	1202.55	98.832	1			1			54918	0	0	19304	0	0
1744	56;1604	EQEEADIAAR	10	0	1130.52	83.227	1	1			1	1	268910	56429	0	0	293180	583920
1745	1137	EQEELLAPADGTVELVR	17	0	1867.95	115.01					1		0	0	0	0	68667	0
1746	917	EQEITAVQAR	10	0	1143.59	120.6		1	1		1	1	0	68320	7989.7	0	106190	170460
1747	479	EQFLDGDGWTSR	12	0	1409.62	119.83			1		1	1	0	0	76740	0	620890	1760800
1748	401	EQGQAPITPQQGQALAK	17	0	1763.92	117.59	1	1	1	1			72666	28864	29854	42044	0	0
1749	1089	EQISDIDDAVR	11	0	1259.6	137.74		1	1	1	1	1	0	1325200	516570	742380	71831	2552500
1750	1379	EQIVPKPEEEVAQK	14	1	1622.85	173.13					1	1	0	0	0	0	169210	264440
1751	1305	EQLEEEAAAR	10	0	1144.54	91.768			1	1			0	0	15203	67528	0	0
1752	449	EQLEEEEEAK	10	0	1232.54	99.46		1	1	2	1	1	0	2160700	44794	1279300	410050	840020
1753	377	EQLGEEIDSK	10	0	1146.54	92.53		1					0	294770	0	0	0	0
1754	282	EQQDLEFAK	9	0	1106.52	76.955		1			1	1	0	227980	0	0	110070	150070
1755	178	EQQIVIQSSGGLSK	14	0	1472.78	137.71						1	0	0	0	0	0	103360
1756	1386	EQVANSAFVER	11	0	1248.61	156.75	1	2	1	1	1		144400	2055500	1091300	1026300	888510	0
1757	722	EQVQSCGPPPELLNGNVK	18	0	1964.96	180.32						1	0	0	0	0	0	185400
1758	125	EQWLNNMQIPEK	12	0	1528.73	125.86						1	0	0	0	0	0	306240
1759	1599	ESAFEFLSSA	10	0	1086.49	106.32		1			1	1	0	10924	0	0	17119	465120
1760	1297	ESAINVAEGK	10	0	1016.51	76.647		1	1	1			0	364360	45858	36104	0	0
1761	44	ESCLEAYTGIVQGLK	15	0	1666.82	137.31					1		0	0	0	0	154020	0
1762	526	ESDEETQIK	9	0	1077.48	78.039		1		1			0	33156	0	7844.5	0	0
1763	56;1604	ESDGAPGDLTSLENER	16	0	1688.75	159.88	1			1		1	405770	0	0	84676	0	84007
1764	847	ESDYFTPQGEFR	12	0	1474.64	107.13				1	1	1	0	0	0	6150.1	477450	162650
1765	1025	ESEAVEWQQK	10	0	1232.57	225.21	1	2	1	1	1	1	332410	958080	91211	192110	412940	575760
1766	145	ESFAEMNR	8	0	982.418	128.07					1	1	0	0	0	0	1464600	588700
1768	931	ESISVSSEQLAQFR	14	0	1579.78	169.2				1	2	1	0	0	0	42588	1083900	3109900
1769	541	ESKPLTAQQTTK	12	1	1330.71	89.535	1	1	1	1			38654	169850	9818.7	7913.2	0	0
1770	329;1615	ESLDVYELDAK	11	0	1280.61	100.71	1				1	1	18300	0	0	0	672000	403680
1772	975	ESLELEDPSSGLGVTK	16	0	1659.82	196.89		1	1		1	2	0	365920	210240	0	237310	317690
1773	631	ESLQQMAEVTR	11	0	1290.62	129.29	1	1		1		1	14429	20157	0	21759	0	202840
1774	517	ESLSSYWESAK	11	0	1285.58	90.309	1		1		1	1	15891	0	8090.9	0	452170	62248
1775	744	ESNPATINAATELDTPK	17	0	1770.86	213.73	1	1	1	1	1	1	392900	167900	96032	75945	456040	180000
1776	526	ESQLPTVMDFR	11	0	1321.63	95.6				1	1		0	0	0	13698	146060	0
1777	585	ESQSPDTTIQR	11	0	1260.59	74.374		1					0	63641	0	0	0	0
1778	784	ESQTQDNITVR	11	0	1289.62	114.27		1		1			0	73315	0	33966	0	0
1779	389;291	ESTGAQVQVAGDMLPNSTER	20	0	2088.97	149.44	1	1	1	1		1	113070	219160	185910	250530	0	107770
1780	150	ESVEQQADSFK	11	0	1266.57	144.42					1	1	0	0	0	0	198330	193410
1781	469	ESYSVYVYK	9	0	1136.54	87.983	1		1	1		1	32440	0	327270	57060	0	1240700
1782	433	ETAAACVEK	9	0	977.449	93.078	1	1	1	1			27522	180330	23836	109810	0	0
1783	451	ETAASLLQAGYK	12	0	1250.65	166.78		1	1				0	50180	33736	0	0	0
1784	1542	ETADTDTADQVMASFK	16	0	1728.75	224.54	1	1	1	1	2	2	204560	85867	47880	48190	1687400	4182100
1785	1602	ETAEADVASLNR	12	0	1274.61	104					1	1	0	0	0	0	340560	442290
1786	65	ETAEAYLGK	9	0	980.481	84.57	1	2	1	1	1	2	267750	3690600	556490	813720	561800	999760
1787	178	ETAENYLGHTAK	12	0	1332.63	190.36		1			1	1	0	12119	0	0	508800	334460
1790	695	ETDNAAIIMK	10	0	1104.55	86.457		1					0	562630	0	0	0	0
1791	236	ETEEILADVLK	11	0	1258.67	115.23		1			1		0	9858.9	0	0	250560	0
1792	168	ETENDDLTNVIQK	13	0	1517.72	159.35		1	1	1			0	79414	24956	75891	0	0
1793	1612	ETFDGVCGAPEDIECR	16	0	1853.76	106.06				1		1	0	0	0	197040	0	16949
1794	740	ETFLTSPEELYR	12	0	1483.72	99.491					1		0	0	0	0	89675	0
1795	744	ETFTTGLDAPR	11	0	1206.59	111.14					1	1	0	0	0	0	1049300	1336100
1796	53	ETIPLQETSLYTQDR	15	0	1792.88	123.84		1			1	1	0	37537	0	0	423660	170420
1797	851	ETLEQLSEFNDSLK	14	0	1651.79	115.15					1		0	0	0	0	84218	0
1798	983	ETLFSVMPGLK	11	0	1220.65	142.97					1		0	0	0	0	113720	0
1799	1237	ETLLNSATTSLNSK	14	0	1477.76	152.67					1	1	0	0	0	0	340230	880300
1800	542	ETLLQDFR	8	0	1020.52	92.125					1	1	0	0	0	0	184760	45210
1801	1395	ETLNISGPPLK	11	0	1167.65	157.14		1	1				0	139120	214180	0	0	0
1802	393	ETLPAEQDLTTK	12	0	1344.68	89.404	1	1	1	1			238560	827010	375750	544590	0	0
1803	1484	ETMQSLNDR	9	0	1092.49	153.83		1	2	2	1	1	0	4456700	873840	1824200	519240	392820
1804	631	ETMVTSTTEPSR	12	0	1337.61	148.89		1	2	1			0	273420	45452	163460	0	0
1805	1393	ETNLDSLPLVDTHSK	15	0	1667.84	174.95					1	1	0	0	0	0	2644100	1397400
1806	42	ETPALTINR	9	0	1013.55	122.16			1		1	2	0	0	129470	0	149030	764070
1808	339	ETQSQLETER	10	0	1219.57	139.92		1		1			0	98510	0	60765	0	0
1809	991	ETSMVHELNR	10	0	1214.57	176.02					1		0	0	0	0	138500	0
1810	330	ETTDTDTADQVIASFK	16	0	1740.81	206.38	1	1	1	1	2	1	25453	102450	104760	55840	1235300	1758700
1811	1212;1625	ETVQLYEDEVR	11	0	1379.66	240.22	1				1	2	25983	0	0	0	1049900	703110
1812	1120	ETVQTTEDQILK	12	0	1403.71	167.19	1		1	1	1	3	496330	0	30259	1229700	560250	1456700
1813	914	ETVSEESNVLCLSK	14	0	1593.76	150.4	1		1	1	2	1	8081.9	0	87020	8588	895940	184390
1814	125;958	ETWLSENQR	9	0	1161.54	95.985					1	1	0	0	0	0	224350	225000
1816	1134	EVAFDLEIPK	10	0	1159.61	92.843					1		0	0	0	0	146860	0
1817	1204	EVANSTANLVK	11	0	1144.61	148.76		1	1		1	1	0	394350	39775	0	497000	1088900
1818	212	EVCEEAGVK	9	0	1019.46	96.335	1	1	1	1			35881	74068	17101	93104	0	0
1819	942	EVCGFAPYER	10	0	1226.54	128.13					1	1	0	0	0	0	2013600	638870
1820	1358	EVDDLGPEVGDIK	13	0	1384.67	158.13						1	0	0	0	0	0	264210
1821	797	EVDEDFDSK	9	0	1082.44	80.443		1	1	1			0	448560	36201	311250	0	0
1822	176;325;1508	EVDEQMLNVQNK	12	0	1445.68	239.92	1	2	1	1	1	2	2825900	3191000	1814600	4000000	4513200	9058000
1823	553	EVDIGIPDATGR	12	0	1241.63	115.42		1			1	1	0	510560	0	0	2159900	1517800
1824	1198	EVDNFVDK	8	0	964.45	90.78				1			0	0	0	72658	0	0
1825	280	EVDVGLAADVGTLQR	15	0	1541.8	182.49		1			1	1	0	20217	0	0	185980	25800
1826	509	EVDVNLPK	8	0	912.492	87.911		1			1	1	0	56453	0	0	85115	125440
1827	1120	EVENSEDPK	9	0	1045.46	90.506	1	1	1	1			28576	28978	3441.4	22178	0	0
1828	1459	EVEQFTQVAK	10	0	1177.6	118.73	1	1			1	1	3655	202500	0	0	191990	244470
1829	1411	EVFEDAAEIR	10	0	1177.56	169.65	1	2	1	2	1	2	382400	102170	61520	147510	104710	530430
1830	1449;669	EVFEMATR	8	0	981.459	89.419		1	1		1	1	0	134820	3436.1	0	1459200	814460
1831	1099	EVFPVLAAK	9	0	972.564	75.365			1		1	1	0	0	5705.9	0	114030	203430
1832	409	EVGPTNADPVCLAK	14	0	1469.72	157.45	2	2	1	1	3	1	668420	1196200	475700	670080	1515800	4134900
1833	1599	EVGVYEALK	9	0	1006.53	76.649				1	1	1	0	0	0	3670.3	1958500	762790
1834	1204	EVIQEWNLTNIK	12	0	1485.78	157.24					1		0	0	0	0	264470	0
1835	815	EVITAVR	7	0	786.46	96.746	1	1	1				12050	317570	35788	0	0	0
1836	1375	EVLHGNQR	8	0	951.489	88.847					1	1	0	0	0	0	299780	40657
1837	1458	EVNLAVQNAK	10	0	1084.59	192.44	1	2	1	2	1	1	21664	309410	53850	466060	394990	344800
1838	1232	EVNVSPCPTQPCQLSK	16	0	1842.86	130.24		1	1	1			0	90582	135840	85416	0	0
1839	732	EVPAVPETLK	10	0	1081.6	74.775		1		1			0	351240	0	139030	0	0
1840	1212	EVPISLEVSQDR	12	0	1370.7	175.37	1				1	2	34873	0	0	0	1423000	501840
1841	1212	EVPVYIGEDSTIAR	14	0	1547.78	136.73						1	0	0	0	0	0	496420
1842	590	EVQDGIAPR	9	0	983.504	80.626	1			1			7196.2	0	0	141340	0	0
1843	1004	EVQGNESEAFR	11	0	1264.57	130.68		1		2			0	186100	0	28994	0	0
1844	1600	EVQLLESGGGLVQPGGSLR	19	0	1895.01	171.99					1		0	0	0	0	538700	0
1845	1487	EVQLVESGGGLVQPGGSLR	19	0	1881	253.42					3	2	0	0	0	0	1117500	2790100
1846	998	EVQPVELPNCNLVK	14	0	1637.84	129.25	1				1	1	31503	0	0	0	177310	237760
1847	425	EVQQGEEFER	10	0	1249.56	181.26		1			1	1	0	146130	0	0	205840	377900
1848	917	EVQQLQGK	8	0	928.498	136.68	1	1	1	1		1	29089	93600	33826	121170	0	11358
1849	1397	EVQTNDLK	8	0	945.477	108.63			1	1	1	1	0	0	25336	45402	106910	131980
1850	297	EVSSATNALR	10	0	1046.54	158.96		2	2	1			0	783750	278310	238360	0	0
1851	1167	EVTDEIVK	8	0	931.486	92.098		1				1	0	1905500	0	0	0	200410
1852	1570	EVTPEGLQMVK	11	0	1229.63	79.204					1	1	0	0	0	0	238200	297500
1853	1377	EVVEEAENGR	10	0	1130.52	272.23	1	1	1	1			268910	499600	74037	779500	0	0
1854	413	EVVQNFAK	8	0	933.492	136.8		1	1	2	1	2	0	1344000	720240	375670	303600	415140
1855	1169	EVWEELDGLDPNR	13	0	1570.73	111.84					1		0	0	0	0	117320	0
1856	211	EVWEETDGLDPNDFDPK	17	0	2004.86	102.24					1		0	0	0	0	113780	0
1857	491	EWIEGVTGR	9	0	1045.52	129.88	1	1	1		2	2	137570	5228.9	21128	0	7317700	15033000
1858	401	EYIPTVFDNYSAQSAVDGR	19	0	2130.99	145.3					1		0	0	0	0	114590	0
1859	1612	EYQACGPAEEPTCK	14	0	1638.67	137.18				1			0	0	0	48875	0	0
1860	1393;1426;40	EYQDLLNVK	9	0	1120.58	202.59		1	1	1	1	2	0	1139600	961440	397590	43344000	54839000
1861	318	EYQELLNVK	9	0	1134.59	209.61					1	1	0	0	0	0	1150800	1034700
1863	123	EYQISAGDFPEVK	13	0	1481.7	134.29						1	0	0	0	0	0	270240
1864	1540	EYQLNDSAAYYLNDLER	17	0	2075.94	171.61					1		0	0	0	0	222570	0
1865	1424	EYQTQLIQR	9	0	1177.61	93.702		1	1			1	0	63902	80107	0	0	10554
1866	409	EYTDASFTNR	10	0	1202.52	123.37	1	2	1	1	1	1	154490	562030	73609	192090	500320	2793900
1867	487	EYTGFPDPYDELNTGK	16	0	1844.81	109.85						1	0	0	0	0	0	167560
1868	872	EYVESQLQR	9	0	1150.56	166.09	1			1	1	1	421600	0	0	1427500	1193700	1341200
1869	1378	FAAATGATPIAGR	13	0	1202.64	227.81	1	2	1	1	1	1	374730	1671500	2239000	1888400	3736500	5660800
1870	1535	FAADAVK	7	0	720.381	98.156	1	1	1	1	1	1	265920	95216	27539	65218	175030	148830
1871	327	FAALDNEEEDK	11	0	1279.56	118.13	1	2	1	1		1	352900	2834400	78269	664110	0	3552300
1872	1233	FAANPNQNK	9	0	1002.49	100.39	1	1	1	1			28643	54935	49084	31559	0	0
1873	1393	FADLSEAANR	10	0	1092.52	214.7	1	3	1	1	1	2	338860	4868500	853830	413860	23677000	21861000
1874	1234	FADQHVPGSPFSVK	14	0	1514.75	96.242					1	1	0	0	0	0	233850	52749
1875	1395	FAEIIEK	7	0	848.464	89.192		1		1	1	1	0	89930	0	28991	219720	295320
1876	1159	FAEQLIR	7	0	875.486	118.97					1	1	0	0	0	0	231870	1464300
1877	1613	FAETQPK	7	0	819.413	93.728	1	1	1				46484	436960	133350	0	0	0
1878	663	FAFQAEVNR	9	0	1080.54	137.48			1		3	1	0	0	39044	0	521850	639310
1879	1084	FAGVDIR	7	0	776.418	113.97		1			1	1	0	51938	0	0	901420	238440
1880	1542;330	FAIQDISVEETSAK	14	0	1536.77	164.86		1	1	2	2	1	0	28042	21188	15486	1822900	2086400
1881	231	FAMEPEEFDSDTLR	14	0	1685.72	99.581					2		0	0	0	0	890820	0
1882	318	FANFIEK	7	0	867.449	166.14					1	1	0	0	0	0	1029200	255830
1883	1393	FANYIDK	7	0	869.428	156.35		2	1	2	1	2	0	2459000	360780	1014000	15788000	25007000
1884	1426	FANYIEK	7	0	883.444	164.52	2		1	2	1	2	853170	0	76256	260200	28788000	35526000
1885	269	FAQMLEK	7	0	865.437	169.95		1	1	1	1	1	0	142050	8496.6	104870	288130	523790
1886	1426	FASEASGYQDNIAR	14	0	1527.7	275.44	1	1	1	1	1	2	6760000	180900	73764	1838800	19884000	29407000
1887	1491	FASEIAGVDDLGTTGR	16	0	1607.78	157.6					1		0	0	0	0	494400	0
1888	1363	FASENDLPEWK	11	0	1334.61	136.62		1	1	1	1	1	0	7562.1	9843.5	5957.5	546300	98771
1890	1311	FASGGCDNLIK	11	0	1180.55	83.02		1			1	1	0	117770	0	0	269520	274370
1891	491	FASQQGMTAYGTR	13	0	1416.65	183.78						1	0	0	0	0	0	256140
1892	840	FAVEEIIQK	9	0	1075.59	76.426	1			1	1		16162	0	0	69995	87226	0
1893	700	FAVTNQIGPVK	11	0	1172.66	93.602						1	0	0	0	0	0	71233
1894	1370	FAVYLPPK	8	0	933.532	121.14					1	1	0	0	0	0	196510	134190
1895	1075	FCAQPWEEIK	10	0	1306.6	123.77	1	1	1		1	1	24996	17419	13600	0	458400	49468
1896	99	FCDNSSAIQGK	11	0	1225.54	124.14		1					0	56114	0	0	0	0
1897	973	FCECDNFNCDR	11	0	1535.52	203.61					1	1	0	0	0	0	240240	118450
1898	1387	FCENTQAGEGR	11	0	1267.53	178.19		1		1			0	55130	0	23901	0	0
1899	868	FCLDNGAK	8	0	923.417	117.75		2	2	1	2	2	0	599640	248890	173430	1564600	1747100
1900	820	FCNVDDDELR	10	0	1281.53	139.32					1	1	0	0	0	0	363880	248040
1901	400	FDAGELITQR	10	0	1148.58	170					1	1	0	0	0	0	1379000	161010
1902	583	FDAGSGMATIR	11	0	1124.53	146.01		1	1		1	3	0	21906	4187.5	0	1062800	1063800
1903	466	FDAQTGADR	9	0	979.436	105.95		1	1	1			0	81742	13357	29467	0	0
1904	82	FDDAVVQSDMK	11	0	1253.56	166.85	1	1	1		1	1	11245	701510	684440	0	1550600	2640500
1905	498	FDDGAGGDNEVQR	13	0	1378.57	134.93		1					0	138030	0	0	0	0
1906	1013	FDECVLDK	8	0	1024.45	162.73		1			1	1	0	43435	0	0	469310	343060
1907	547	FDEFFSEGCAPGSK	14	0	1576.65	178.14	1	1	1	1	2	1	50719	107000	54635	69446	5224600	1517400
1908	1453	FDEILEASDGIMVAR	15	0	1664.81	84.98					1		0	0	0	0	343360	0
1909	1201	FDEYFSQSCAPGSDPR	16	0	1861.76	153.73		1	1			1	0	645250	141120	0	0	160530
1911	72	FDMELDDLPK	10	0	1221.56	100.27	1				1		1044.8	0	0	0	91996	0
1912	288	FDNLYGCR	8	0	1043.45	158.47		1			1	1	0	23271	0	0	217710	242490
1913	47	FDQGDTTR	8	0	938.409	112.33		1	1				0	23019	4530.9	0	0	0
1914	476;595;1533;449;1305	FDQLLAEEK	9	0	1091.55	207.6		3		1	1	3	0	351920	0	18952	1577500	4394500
1915	583	FDQPDDFK	8	0	1010.43	112.62		1				1	0	336180	0	0	0	296820
1916	1610;1439;1519;1626	FDSDAASPR	9	0	964.425	145.14	1	1	1	1		1	14193	541800	43705	58615	0	7057.3
1917	1441;1529;1543;1627	FDSDAASQR	9	0	995.431	151.38	1	1	1	1	1	1	53271	853290	44910	344190	73960	101150
1918	648	FDSDATSPR	9	0	994.436	128.9	1	1	2	1	1	1	64417	149780	85594	296240	53619	171590
1919	1624;116;831	FDSDVGEFR	9	0	1070.47	127.54		1			1	2	0	47319	0	0	523150	319400
1920	115;1609	FDSDVGEYR	9	0	1086.46	140.11		3	2		1	2	0	186390	88419	0	518770	719350
1921	1621	FDSFTVQYK	9	0	1133.54	114.6			1	2	2		0	0	16049	38426	464150	0
1922	961	FDTGNLCMVTGGANLGR	17	0	1781.82	231.95			1		1	2	0	0	21315	0	411650	491710
1923	217	FDVPGDENAEMDAR	14	0	1564.65	118.57		1	1	1	1	2	0	368760	115150	28932	464080	622230
1924	231	FDVSGYPTLK	10	0	1125.57	158.08		1	1	1	3	4	0	60337	160160	33103	3338400	2704600
1925	361	FDYEGLDPK	9	0	1082.49	106.8				1	1	2	0	0	0	4798	2489800	2697200
1926	1486	FEDCCQEK	8	0	1114.41	115.44	1	1	1	1			27012	105280	8816.6	39159	0	0
1927	1614	FEDENFILK	9	0	1153.57	161.53					2	1	0	0	0	0	34383000	9280100
1928	1203	FEDGVLDPDYPR	12	0	1421.65	150.91		2	2	1	1	4	0	73080	48796	4622.8	2020100	3053100
1929	819	FEEFLQR	7	0	967.476	123.23					1		0	0	0	0	25884	0
1930	82;174	FEELNADLFR	10	0	1252.61	199.74					1		0	0	0	0	304060	0
1931	179	FEETTADGR	9	0	1024.45	126.44	1	2	1	1	1	1	92773	966990	129540	807130	192540	280740
1932	539	FEGIACEISK	10	0	1152.55	96.957						1	0	0	0	0	0	398180
1933	697	FELDTSER	8	0	995.456	91.524		1			1	1	0	103050	0	0	890960	518080
1934	1566	FEMTEQEK	8	0	1040.45	86					1	1	0	0	0	0	165890	240720
1935	125	FESLEPEMNNQASR	14	0	1650.73	233					1	1	0	0	0	0	475350	834890
1937	57	FEVIEKPQA	9	1	1059.56	108.21					1		0	0	0	0	1483000	0
1938	1507	FEVQGLQPNGEEMTLK	16	0	1818.88	153.46		1			1	1	0	21827	0	0	196940	466850
1939	1448	FEVQVTVPK	9	0	1045.58	153.3					1	1	0	0	0	0	517030	1336900
1940	408	FFDANYDGK	9	0	1075.46	88.583					1	1	0	0	0	0	326210	331760
1941	691	FFEEVNDPAK	10	0	1194.56	98.15					1		0	0	0	0	325030	0
1942	1443	FFESFGDLSSPDAVMGNPK	19	0	2043.92	135.7					1		0	0	0	0	295630	0
1943	1520	FFESFGDLSTPDAVMGNPK	19	0	2057.94	227.17					4	1	0	0	0	0	30506000	35024
1944	1031	FFGNLMDASK	10	0	1128.53	86.823					1		0	0	0	0	121530	0
1945	573	FFNVLTTNTDGK	12	0	1355.67	107.18					1		0	0	0	0	327330	0
1946	1331	FFQELPGSDPVFK	13	0	1509.75	85.55					1		0	0	0	0	53903	0
1947	217	FFQTACDVPELQDK	14	0	1696.78	179.66					1		0	0	0	0	1528500	0
1948	1201	FFSASCVPGADK	12	0	1284.58	164.17		1	1			1	0	380570	233070	0	0	79099
1949	361	FFSNLMDSGR	10	0	1172.53	112.2					1	1	0	0	0	0	459410	38224
1950	1308	FFTGQITAAGK	11	0	1139.6	98.201						1	0	0	0	0	0	0
1951	818	FFVADTANEALEAAK	15	0	1595.78	154.12					1		0	0	0	0	994800	0
1952	1204	FFYSDQNVDSR	11	0	1376.6	122.27						1	0	0	0	0	0	144580
1953	56;1604	FGDLLNIDDTAK	12	0	1320.66	196.73					1	1	0	0	0	0	1451400	35152
1954	699	FGEVVDCTLK	10	0	1166.56	205.68		1	1	1	2	4	0	143100	163710	37793	4159500	2410100
1955	493	FGGALDAAAK	10	0	919.476	95.706		2		1	2	1	0	110590	0	17909	234260	210030
1956	752	FGGGNPELLTQMVSK	15	0	1576.79	195.56					2		0	0	0	0	1587600	0
1957	294	FGGSGSQVDSAR	12	0	1166.53	147.79		1	1	1			0	52856	25405	20907	0	0
1958	428	FGIYDIDNK	9	0	1083.52	102.31		1			1	1	0	8810.9	0	0	132640	51911
1959	589	FGLIQSMK	8	0	922.495	125.07					1		0	0	0	0	109230	0
1960	743	FGLSAAEDITPR	12	0	1275.65	120.32			1	1	1		0	0	123110	40444	175250	0
1961	553	FGMTPSK	7	0	766.368	103.3	1	1	1	1			16972	183270	10679	60673	0	0
1962	738	FGNEVIPVTVTVK	13	0	1401.79	106.3					2		0	0	0	0	922120	0
1963	194	FGPALSVK	8	0	817.47	102.06		1			1	1	0	23640	0	0	76851	298950
1964	1189	FGQVYTEAK	9	0	1041.51	121.85		1		2			0	298050	0	66789	0	0
1965	375	FGSNINLEADES	12	0	1294.57	104.12		1		1	1		0	14098	0	54320	56413	0
1966	1530	FGTAIAAVK	9	0	876.507	116.73		1			1	1	0	11976	0	0	188440	340130
1967	1453	FGVEQDVDMVFASFIR	16	0	1858.89	87.815			1				0	0	0	0	0	0
1968	586	FGVYDIDNK	9	0	1069.51	105.91					1	1	0	0	0	0	220380	84390
1969	979	FIIPNVVK	8	0	928.575	91.115					1	1	0	0	0	0	539050	290330
1970	1418	FINDQYEK	8	0	1055.49	83.414		1			1	1	0	285310	0	0	259300	271310
1971	1549	FISLGEACK	9	0	1023.51	107.88		1			1	1	0	104400	0	0	1700100	1137700
1973	1368	FLASVSTVLTSK	12	0	1251.71	212.88		1			7	4	0	25238	0	0	3802100	140600
1974	757	FLDGIYVSEK	10	0	1169.6	130.6		1			1		0	7444.2	0	0	203860	0
1975	1478	FLEDVKK	7	1	877.491	115.13	1		1		1	1	9760.9	0	7944.5	0	2020000	411660
1976	1478	FLENEDR	7	0	921.419	102.98		1			1	1	0	641140	0	0	5686800	9160100
1977	1426	FLEQQNAALAAEVNR	15	0	1672.85	298.26	1			1	5	2	510690	0	0	40886	8094300	10094000
1978	318	FLEQQNAALR	10	0	1188.63	200.29					1	2	0	0	0	0	1922200	1151300
1981	1144	FLICTDVAAR	10	0	1164.6	114.56					1		0	0	0	0	0	0
1982	490	FLIPNASQAESK	12	0	1303.68	141.98	1	1	2	1	1	3	99469	282120	947140	97539	2932700	7015700
1984	423	FLLSESGSGK	10	0	1023.52	80.743						1	0	0	0	0	0	101280
1985	749;240	FLMANGQLVK	10	0	1119.61	83.893					1		0	0	0	0	57813	0
1986	1363	FLNAENAQK	9	0	1033.52	155.26		2	3	2	2	2	0	564070	277970	69682	444850	502750
1987	423	FLSQIESDR	9	0	1093.54	102.55					1	1	0	0	0	0	18096	136600
1988	1607	FLVGPDGVPLR	11	0	1168.66	112.9					1		0	0	0	0	192860	0
1989	1122	FMETVAEK	8	0	953.453	127.76		1	1		1	1	0	558010	7995	0	474140	890290
1990	1490;290	FMQASEDLLK	10	0	1180.58	159.48					2	1	0	0	0	0	666530	588940
1991	1516	FNADEFEDMVAEK	13	0	1543.65	111.96					1		0	0	0	0	1522600	0
1992	1021	FNAHGDANTIVCNSK	15	0	1646.75	271.56					2	2	0	0	0	0	2564500	2079400
1993	578	FNALFAQGNYSEAAK	15	0	1629.78	182.4	1		1		1		21158	0	9702.9	0	269580	0
1994	484	FNALQYLR	8	0	1023.55	113.26					1		0	0	0	0	186200	0
1995	665	FNASQLITQR	10	0	1176.63	166.82		1			2	1	0	21099	0	0	1092800	539280
1996	1384	FNAVLCSR	8	0	965.475	84.41						1	0	0	0	0	0	0
1997	538	FNAVLTNPQGDYDTSTGK	18	0	1926.9	165.09		1	1	1	1	2	0	216270	171450	131900	343050	699530
1998	1406	FNDGSDEK	8	0	910.367	93.717	1	1	1	1			15631	100730	20313	145080	0	0
1999	1144	FNFGEEEFK	9	0	1145.5	86.441				1	1		0	0	0	11115	161420	0
2000	1031	FNISNGGPAPEAITDK	16	0	1629.8	92.53		1	1			1	0	102760	71515	0	0	29220
2001	416	FNPETDYLTGTDGK	14	0	1556.7	152.8	1	2	1	1	1	2	26078	149640	48164	124120	871010	786230
2002	1340	FNQGMVDTAK	10	0	1109.52	105.48		1		1			0	114350	0	0	0	0
2003	467	FNQLPVELK	9	0	1086.61	100.06					1	1	0	0	0	0	221160	254760
2004	282	FNQVLDQFGEK	11	0	1323.65	92.226						1	0	0	0	0	0	76843
2005	1432	FNTANDDNVTQVR	13	0	1492.69	242.59	1	1	1	1	1	1	128040	185250	102940	297610	875800	1447800
2006	423	FNTSDVSAIEK	11	0	1209.59	110.71		1			1	1	0	129850	0	0	642610	514370
2007	361	FNVANGGPAPDVVSDK	16	0	1585.77	201.88	1			1	1	1	1155300	0	0	261330	521310	1158600
2008	73	FNVIQPGPIK	10	0	1111.64	94.104			1			2	0	0	40215	0	0	298540
2009	938	FNVSYLK	7	0	869.465	105.88						1	0	0	0	0	0	0
2010	1501	FNVWDTAGQEK	11	0	1293.6	127.13					1	1	0	0	0	0	1278200	329290
2011	927	FNVWDVGGQDK	11	0	1263.59	130.57					1		0	0	0	0	311680	0
2012	217	FPDAGEDELLK	11	0	1232.59	105.96					1	1	0	0	0	0	381750	352900
2013	1511	FPDENFK	7	0	895.408	117.59		2	1		1	2	0	446180	39220	0	502280	696710
2014	526	FPEVDVLTK	9	0	1046.56	103.55					1	1	0	0	0	0	230900	124440
2015	176;325;1508;1515	FPGQLNADLR	10	0	1129.59	126.62					2	2	0	0	0	0	3680800	1235000
2016	24	FPGYDSESK	9	0	1028.45	96.551		1			1	1	0	302290	0	0	312950	224310
2017	492	FPLTTESAMK	10	0	1123.56	84.592			1			1	0	0	46910	0	0	45867
2018	162	FPTDQLTPDQER	12	0	1445.68	163.2		2	1				0	527430	225980	0	0	0
2019	362	FPVTDAVNK	9	0	989.518	137.78	1	2	1	1	1	2	25663	560460	233730	23296	60617	1043600
2020	190	FQDLGAAYEVLSDSEK	16	0	1770.83	128.69					1		0	0	0	0	142260	0
2021	943	FQLVDSR	7	0	863.45	89.551						1	0	0	0	0	0	66119
2022	1103	FQMPDQGMTSADDFFQGTK	19	0	2149.91	228.31					1		0	0	0	0	571500	0
2024	672	FQSLNADINK	10	0	1148.58	153.02		1			1	1	0	230050	0	0	317010	843450
2025	1277	FSALLSDCVR	10	0	1166.58	106.84					1		0	0	0	0	38744	0
2026	500	FSASGELGNGNIK	13	0	1292.64	131.57		1	1	1	1	1	0	222940	369240	131120	39483	105680
2027	907	FSATEVTNK	9	0	995.492	84.857		1					0	158330	0	0	0	0
2028	1213	FSEINPDMK	9	0	1079.5	159.05	1	1					35202	163650	0	0	0	0
2029	257	FSELTAEK	8	0	923.46	136.56		1	1	1		1	0	783250	55302	174050	0	47706
2030	320	FSFQCPGR	8	0	997.444	115.55					1	1	0	0	0	0	856260	152360
2031	209	FSGDLDDQTCR	11	0	1312.54	120.77		2	1		1	1	0	316300	22576	0	167880	277490
2032	1473;1531	FSGSGSGTDFTLK	13	0	1302.61	175.18	1	1	1	1	1	2	108820	339160	147710	94154	4091800	9364000
2033	1555;1344;1600	FSGSGSGTDFTLTISR	16	0	1631.78	113.46	1	1			1	1	6895.3	12733	0	0	273350	551690
2034	853	FSGSNSGNTATLTISR	16	0	1611.79	185.51	1		1	1		1	193340	0	59994	76549	0	125640
2035	1450	FSGSSSGAER	10	0	983.431	139.83	1	1	1	1			17369	12467	12004	47888	0	0
2036	509	FSMPGFK	7	0	812.389	101.04					1		0	0	0	0	897830	0
2037	597	FSMVVQDGIVK	11	0	1221.64	157.74		1			2	1	0	43703	0	0	1257100	20561
2038	1237	FSNISAAK	8	0	836.439	100.89	1	1	2	2	2	2	50357	355930	120620	121440	89319	194050
2039	583	FSSGITGCVK	10	0	1054.51	97.195						1	0	0	0	0	0	485460
2040	444	FSSSGGGGGGGR	12	0	981.426	90.394		1		1			0	10757	0	17588	0	0
2041	1588	FSSVQLR	7	0	835.455	91.836					1	1	0	0	0	0	5388700	519340
2042	1432	FSTVAGESGSADTVR	15	0	1482.7	155.86	1		1	1	1	1	121630	0	117420	506170	607940	1406800
2043	744	FSVGDAK	7	0	722.36	89.122		1	1		1	1	0	197840	22625	0	77417	82947
2044	496	FSVNLDVK	8	0	920.497	129.91					1	1	0	0	0	0	638510	856460
2045	255	FSYLPIQK	8	0	994.549	81.952						1	0	0	0	0	0	0
2046	1428	FTASAGIQVVGDDLTVTNPK	20	0	2032.05	237.13		1	1	2	2	2	0	28517	80797	43075	582780	2094400
2047	352	FTAVEDQYYCVDCYK	15	0	1959.8	138.95					1		0	0	0	0	87373	0
2048	783	FTDEEVDELYR	11	0	1414.63	211.02		1	1		1	2	0	148210	55313	0	285740	3180200
2049	1055	FTDEEVDEMYR	11	0	1432.58	230.24	1	1		1	2	2	3011.4	63484	0	35000	12825000	15926000
2050	463	FTDSENVCQER	11	0	1383.57	181.09		1			1	1	0	87242	0	0	109380	67940
2051	346	FTDYQLR	7	0	941.461	100.47					1		0	0	0	0	94672	0
2052	1293	FTEEEEQLSR	10	0	1266.57	132.7		2		1	1	2	0	170190	0	139020	191100	250260
2053	249	FTITAGSK	8	0	823.444	101.85						1	0	0	0	0	0	258600
2054	1274	FTLLPPTSPGDTAPK	15	0	1540.81	107.43					1	1	0	0	0	0	144790	114540
2055	541	FTNIGPDTMR	10	0	1150.54	136.18		1			1	1	0	186300	0	0	0	0
2056	1242	FTQAGSEVSALLGR	14	0	1434.75	237.97					2		0	0	0	0	5483600	0
2057	1033	FTQQDIDEAK	10	0	1193.56	151.44		1			1	1	0	79071	0	0	159520	123220
2058	541	FTQVTPTSLSAQWTPPNVQLTGYR	24	0	2691.37	133.44					1		0	0	0	0	165840	0
2059	1272	FTSTGQCNDR	10	0	1184.49	143.49		1		1		1	0	70973	0	19249	0	181410
2060	744	FTTDLDSPR	9	0	1050.5	115.12		2			1	1	0	661480	0	0	389410	824950
2061	413	FTTGDAMSK	9	0	956.427	84.192		1	2	1	1	1	0	1583300	878930	73898	233640	181950
[truncated: 4,205 more rows]

## Sheet: proteinGroups
id	Protein IDs	Protein Names	Gene Names	Protein Descriptions	Uniprot	MS/MS Count C1	MS/MS Count C2	MS/MS Count C3	MS/MS Count N1	MS/MS Count N2	MS/MS Count N3	Unique Peptides C1	Unique Peptides C2	Unique Peptides C3	Unique Peptides N1	Unique Peptides N2	Unique Peptides N3	Sequence Coverage [%]	Mol. Weight [kDa]	Sequence Length	Intensity C1	Intensity C2	Intensity C3	Intensity N1	Intensity N2	Intensity N3
19	IPI00000015;IPI00012345;IPI00215879;IPI00556297;IPI00908618;IPI00915825;IPI00012341;IPI00413654	Pre-mRNA-splicing factor SRP75;Splicing factor, arginine/serine-rich 4;SRP001LB;cDNA FLJ76859, highly similar to Homo sapiens splicing factor, arginine/serine-rich 4 (SFRS4), mRNA;Splicing factor, arginine/serine-rich 4, isoform CRA_b;Splicing factor, arginine/serine-rich 4 variant;Pre-mRNA-splicing factor SRP55;Splicing factor, arginine/serine-rich 6;cDNA FLJ76823, highly similar to Homo sapiens…	SFRS4;SRP75;hCG_23483;SFRS6;SRP55;HRS;SFRS5;SRP40;hCG_21965	Splicing factor, arginine/serine-rich 4;Isoform SRP55-1 of Splicing factor, arginine/serine-rich 6;Isoform SRP55-3 of Splicing factor, arginine/serine-rich 6;Arginine/serine-rich splicing factor 6 variant (Fragment);cDNA FLJ50118, highly similar to Splicin	Q08170;A8K644;Q53F45;Q59EF5;Q13247-1;Q13247;A8K588;Q13247-3;Q59GY3;B4DEM8;Q59EK7;Q13243-1;Q13243;B4DJK0;B4DUA4;Q86U32;Q13243-3	0	1	0	0	1	1	0	1	1	0	1	2	3.2	56.678	494	0	30057	228020	0	27140	19742
20	IPI00000105;IPI00910019	Lung resistance-related protein;Major vault protein;cDNA FLJ54588, highly similar to Major vault protein;cDNA FLJ53371, highly similar to Major vault protein;cDNA FLJ53437, highly similar to Major vault protein	LRP;MVP	Major vault protein;cDNA FLJ53437, highly similar to Major vault protein	Q14764;B4DDR2;B4DXN0;B4DP93	2	6	0	4	7	7	5	7	3	4	9	9	13.2	99.326	893	523480	2583800	51565	888380	175660	195240
21	IPI00000130	Growth hormone release-inhibiting factor;Somatostatin;Somatostatin-14;Somatostatin-28	SST	Somatostatin	P61278	0	0	0	1	0	0	0	1	0	1	0	0	9.5	12.735	116	0	12722	0	75005	0	0
22	IPI00657752;IPI00000190	Putative uncharacterized protein CD81;26 kDa cell surface protein TAPA-1;CD81 antigen;Target of the antiproliferative antibody 1;Tetraspanin-28	CD81;TAPA1;TSPAN28	Putative uncharacterized protein CD81;CD81 antigen	A6NMH8;P60033	0	0	0	0	1	1	0	0	0	0	1	1	7.3	29.806	274	0	0	0	0	42158	208510
23	IPI00000230;IPI00915324;IPI00793630	Putative uncharacterized protein DKFZp586K2222;Tropomyosin 1 (Alpha), isoform CRA_a;Alpha-tropomyosin;Tropomyosin alpha-1 chain;Tropomyosin-1	DKFZp586K2222;hCG_33495;TPM1;C15orf13;TMSA	tropomyosin 1 alpha chain isoform 2;Isoform 6 of Tropomyosin alpha-1 chain	Q9Y427;P09493-6;P09493	2	1	0	2	1	1	0	0	0	0	0	0	40.8	32.677	284	22804000	502740	37527	5428800	3815200	6065600
24	IPI00000494	60S ribosomal protein L5;cDNA, FLJ95579, Homo sapiens ribosomal protein L5 (RPL5), mRNA;Ribosomal protein L5;Ribosomal protein L5, isoform CRA_c;cDNA FLJ38496 fis, clone FELIV1000137, highly similar to 60S RIBOSOMAL PROTEIN L5;Ribosomal protein L5, isoform CRA_b;Ribosomal protein L5 variant;Ribosomal protein L5, isoform CRA_a;RPL5 protein	MSTP030;RPL5;hCG_2028912	60S ribosomal protein L5	P46777;A2RUM7;B3KTM6;Q59GX9;Q8WYP1;Q9BUV4	0	2	1	1	4	5	0	2	1	2	4	3	14.8	34.362	297	0	643020	388330	81387	531160	342520
25	IPI00744889;IPI00025861;IPI00000513;IPI00911003	E-cadherin;Cadherin-1;CAM 120/80;E-Cad/CTF1;E-Cad/CTF2;E-Cad/CTF3;Epithelial cadherin;Uvomorulin;CDH1 protein;Cadherin 1, type 1, E-cadherin (Epithelial), isoform CRA_b;cDNA FLJ78203, highly similar to Homo sapiens cadherin 1, type 1, E-cadherin (epithelial) (CDH1), mRNA;cDNA, FLJ92924, Homo sapiens cadherin 1, type 1, E-cadherin (epithelial) (CDH1),mRNA;Truncated E-cadherin;Cadherin 1, type 1, E…	CDH1;CDHE;UVO;hCG_28201	E-cadherin;Cadherin-1;Cadherin 1, type 1, E-cadherin (Epithelial), isoform CRA_c;cDNA FLJ60313, highly similar to Epithelial-cadherin	Q9UII7;P12830;A5D8W4;A8K1U7;B3GN61;Q9UII8;B4DNH0	0	0	0	0	2	0	0	0	0	0	2	0	3.6	99.692	901	0	0	0	0	53148	0
26	IPI00000690;IPI00157908;IPI00300018;IPI00910786;IPI00910617	Apoptosis-inducing factor 1, mitochondrial;Programmed cell death protein 8;Apoptosis-inducing factor;Striatal apoptosis-inducing factor;Apoptosis-inducing factor short isoform 3;Apoptosis-inducing factor short isoform 2;Apoptosis-inducing factor short isoform 1	AIF;AIFM1;PDCD8	Isoform 1 of Apoptosis-inducing factor 1, mitochondrial;Isoform 3 of Apoptosis-inducing factor 1, mitochondrial;Isoform 2 of Apoptosis-inducing factor 1, mitochondrial;programmed cell death 8 isoform 5;programmed cell death 8 isoform 4	O95831-1;O95831;O95831-3;Q5RZ99;Q5RZA0;O95831-2;Q1L6K4;Q1L6K6;Q2QKE4	0	4	1	2	1	3	2	4	2	2	3	4	11.1	66.9	613	100850	256740	178790	248690	247140	139970
27	IPI00000760;IPI00647695;IPI00797462;IPI00645821;IPI00646524	DDAHII;Dimethylargininase-2;N(G),N(G)-dimethylarginine dimethylaminohydrolase 2;Protein G6a;S-phase protein;Dimethylarginine dimethylaminohydrolase 2	DDAH;DDAH2;G6A;NG30;DADB-110M10.5-010;DAMA-236L13.14-010;DAMC-117B11.9-010;DAQB-350E15.2-010;DASS-312M4.7-010;XXbac-BCX88C14.2-010;XXbac-BPG32J3.8-010;DADB-110M10.5-007;DAMA-236L13.14-007;DAMC-117B11.9-007;DAQB-350E15.2-007;DASS-312M4.7-007;XXbac-BCX88C14.2-007;XXbac-BPG32J3.8-007;DADB-110M10.5-008;DAMA-236L13.14-008;DAMC-117B11.9-008;DASS-312M4.7-008;XXbac-BCX88C14.2-008;XXbac-BPG32J3.8-008;DAQB…	N(G),N(G)-dimethylarginine dimethylaminohydrolase 2;Dimethylarginine dimethylaminohydrolase 2;Dimethylarginine dimethylaminohydrolase 2;Dimethylarginine dimethylaminohydrolase 2;Dimethylarginine dimethylaminohydrolase 2	O95865;A2ABS5;Q5SRR8;Q5SSV3;A3KGN5	1	0	0	1	1	2	1	1	1	1	1	2	20.7	29.644	285	55141	6423.1	3214.9	122490	0	0
28	IPI00000783;IPI00640155;IPI00215824;IPI00893032;IPI00552984	Low molecular mass protein 7;Macropain subunit C13;Multicatalytic endopeptidase complex subunit C13;Proteasome component C13;Proteasome subunit beta type-8;Proteasome subunit beta-5i;Really interesting new gene 10 protein;Proteasome subunit beta type;PSMB8 protein;Proteasome (Prosome, macropain) subunit, beta type, 8 (Large multifunctional peptidase 7);Proteasome (Prosome, macropain) subunit beta…	LMP7;PSMB5i;PSMB8;RING10;Y2;DAAP-57C1.3-002;DAMA-91I23.1-002;DAMC-27I8.3-002;DAQB-69D7.6-002;DASS-67H14.1-002;hCG_17507;XXbac-BCX32M13.6-002;XXbac-BPG246D15.6-002;DADB-78A10.2-004;DAAP-57C1.3-004;DAMA-91I23.1-004;DAMC-27I8.3-004;DAQB-69D7.6-004;DASS-67H14.1-004;XXbac-BCX32M13.6-004;XXbac-BPG246D15.6-004	Isoform 1 of Proteasome subunit beta type-8;proteasome beta 8 subunit isoform E2 proprotein;Isoform 2 of Proteasome subunit beta type-8;Proteasome (Prosome, macropain) subunit, beta type, 8;Proteasome (Prosome, macropain) subunit, beta type, 8	P28062-1;P28062;Q5QNR8;P28062-2;Q5JNW6;Q6FHU0;B0UZC1;Q5JNW7	1	0	1	0	1	0	1	1	1	1	2	2	6.9	30.354	276	261790	296770	258950	139480	27307	32637
29	IPI00894395;IPI00000787;IPI00170899;IPI00893456;IPI00796431;IPI00893267	Low molecular mass protein 2;Macropain chain 7;Multicatalytic endopeptidase complex chain 7;Proteasome chain 7;Proteasome subunit beta type-9;Proteasome subunit beta-1i;Really interesting new gene 12 protein;Proteasome subunit beta type;Proteasome (Prosome, macropain) subunit, beta type, 9 (Large multifunctional peptidase 2);Proteasome (Prosome, macropain) subunit beta type 9 (Large multifunction…	LMP2;PSMB6i;PSMB9;RING12;DADB-223G19.3-001;DAMA-91I23.6-001;DAQB-69D7.7-001;hCG_17510;XXbac-BCX32M13.7-001;DADB-223G19.3-005;DAMA-91I23.6-005;DAQB-69D7.7-005;XXbac-BCX32M13.7-005;XXbac-BPG246D15.7-005;DAAP-27A1.3-005;DAMC-226H3.3-005;DASS-67H14.4-005;DADB-223G19.3-006;DAMA-91I23.6-006;DAQB-69D7.7-006;XXbac-BCX32M13.7-006;XXbac-BPG246D15.7-006;DAAP-27A1.3-006;DAMC-226H3.3-006;DASS-67H14.4-006	Proteasome subunit beta type;Isoform LMP2.L of Proteasome subunit beta type-9;Isoform LMP2.S of Proteasome subunit beta type-9;Proteasome subunit beta type;Proteasome (Prosome, macropain) subunit, beta type, 9;Proteasome (Prosome, macropain) subunit, beta	B0V0T1;P28065-1;P28065;Q5JNW4;P28065-2;A2ACR1;B0V0T3;A2ACR0;B0V0T2	0	2	2	1	1	1	1	1	2	1	2	1	8.7	23.245	219	45459	883480	302340	138280	160930	69608
30	IPI00000792;IPI00647366;IPI00641565;IPI00642016;IPI00874075;IPI00645425	NADPH:quinone reductase;Quinone oxidoreductase;Zeta-crystallin;Putative uncharacterized protein CRYZ;Crystallin, zeta (Quinone reductase), isoform CRA_a;Putative uncharacterized protein DKFZp686C16101	CRYZ;DKFZp686C16101;hCG_21668	Quinone oxidoreductase;crystallin, zeta isoform b;Putative uncharacterized protein CRYZ;Putative uncharacterized protein CRYZ;Putative uncharacterized protein CRYZ (Fragment);crystallin, zeta isoform c	Q08257;A6NN60;A6NP24;C9JH92;A8MU94;Q5HYE7	0	0	0	1	0	1	0	1	1	1	0	1	6.4	35.206	329	0	9012.8	8571.7	108070	0	0
31	IPI00000811;IPI00789119;IPI00796198	Macropain delta chain;Multicatalytic endopeptidase complex delta chain;Proteasome delta chain;Proteasome subunit beta type-6;Proteasome subunit Y;Proteasome subunit beta type	LMPY;PSMB6;Y;hCG_32695	Proteasome subunit beta type-6;20 kDa protein;12 kDa protein	P28072;Q6IAT9	0	0	0	0	1	1	0	0	0	0	1	1	4.2	25.357	239	0	0	0	0	26788	66407
32	IPI00000816;IPI00793344;IPI00792761;IPI00086909;IPI00795516;IPI00940628;IPI00903243	14-3-3 protein epsilon;cDNA, FLJ79100, highly similar to 14-3-3 protein epsilon (14-3-3E);14-3-3 protein epsilon isoform transcript variant 1;cDNA FLJ51851, highly similar to 14-3-3 protein epsilon (14-3-3E);cDNA, FLJ79084, highly similar to 14-3-3 protein epsilon (14-3-3E);cDNA FLJ60092, highly similar to 14-3-3 protein epsilon (14-3-3E);Putative uncharacterized protein YWHAE	YWHAE	14-3-3 protein epsilon;22 kDa protein;cDNA FLJ60092, highly similar to 14-3-3 protein epsilon	P62258;B7ZA86;Q4VJB6;B4DJB0;C9JAV0	3	6	5	5	9	8	5	7	6	5	9	8	47.5	29.174	255	765120	5853000	3634800	5158500	991120	2326400
33	IPI00913848;IPI00000856;IPI00383500	cDNA FLJ77570, highly similar to Homo sapiens pleckstrin homology domain containing, family C (with FERM domain) member 1 (PLEKHC1), mRNA;KINDLIN2 isoform 2;Fermitin family homolog 2;Kindlin-2;Mitogen-inducible gene 2 protein;Pleckstrin homology domain-containing family C member 1	FERMT2;KIND2;MIG2;PLEKHC1	fermitin family homolog 2 isoform 2;Isoform 1 of Fermitin family homolog 2;Isoform 2 of Fermitin family homolog 2	A8K6S3;B5TJY2;Q96AC1-1;Q96AC1;Q96AC1-2	3	0	0	3	3	3	3	4	2	3	4	3	7.9	78.675	687	2270400	226530	85683	469010	149050	392460
34	IPI00000861;IPI00909678;IPI00386803;IPI00952738;IPI00883946;IPI00015157	LIM and SH3 domain protein 1;Metastatic lymph node gene 50 protein;cDNA FLJ76601, highly similar to Homo sapiens LIM and SH3 protein 1 (LASP1), mRNA;cDNA FLJ51834, highly similar to LIM and SH3 domain protein 1;Putative uncharacterized protein LASP1	LASP1;MLN50	Isoform 1 of LIM and SH3 domain protein 1;cDNA FLJ51834, highly similar to LIM and SH3 domain protein 1;Isoform 2 of LIM and SH3 domain protein 1;Putative uncharacterized protein LASP1;Putative uncharacterized protein LASP1	Q14847-1;Q14847;A8K1D2;B4DGQ0;Q14847-2;C9JVR8;C9J9W2	1	3	0	1	0	1	2	3	2	2	1	2	14.2	29.717	261	1356900	1989300	762330	1480200	111620	145930
35	IPI00893918;IPI00000873;IPI00908612;IPI00939335;IPI00646425;IPI00793323;IPI00893211	Valyl-tRNA synthetase;Protein G7a;Valine--tRNA ligase;cDNA FLJ54383, highly similar to Valyl-tRNA synthetase (EC 6.1.1.9)	DAAP-21F2.2-001;DAMC-117B11.3-001;VARS;G7A;VARS2;DAQB-147D11.5-001;DADB-149K5.2-002;DAQB-147D11.5-002;XXbac-BCX40G17.6-002;XXbac-BPG32J3.9-002;DAAP-21F2.2-002;DAMC-117B11.3-002	Valyl-tRNA synthetase;Valyl-tRNA synthetase;cDNA FLJ54383, highly similar to Valyl-tRNA synthetase;75 kDa protein;Valyl-tRNA synthetase;Valyl-tRNA synthetase;Valyl-tRNA synthetase	B0V043;P26640;B4DT32;Q5SP20;A2ABF4;B0V044	0	0	1	0	0	1	1	0	1	0	1	1	1.9	140.46	1264	0	0	0	0	17863	52180
36	IPI00000874;IPI00640741;IPI00641244	Natural killer cell-enhancing factor A;Peroxiredoxin-1;Proliferation-associated gene protein;Thioredoxin peroxidase 2;Thioredoxin-dependent peroxide reductase 2;cDNA, FLJ92164, highly similar to Homo sapiens peroxiredoxin 1 (PRDX1), mRNA	PAGA;PAGB;PRDX1;TDPX2	Peroxiredoxin-1;19 kDa protein;11 kDa protein	Q06830;B2R4P2;B5BU26	2	7	3	2	11	8	3	4	4	3	6	5	44.7	22.11	199	476500	10672000	21948000	260260	1860800	3102300
37	IPI00000877;IPI00922838;IPI00922127	150 kDa oxygen-regulated protein;170 kDa glucose-regulated protein;Hypoxia up-regulated protein 1;cDNA, FLJ94899, Homo sapiens hypoxia up-regulated 1 (HYOU1), mRNA;Oxigen-regulated protein 150;cDNA FLJ45395 fis, clone BRHIP3027191, highly similar to 150 kDa oxygen-regulated protein (Orp150);cDNA FLJ59408, highly similar to 150 kDa oxygen-regulated protein (Orp150);cDNA FLJ54564, highly similar to…	GRP170;HYOU1;ORP150;DKFZp686N08236	Hypoxia up-regulated protein 1;cDNA FLJ56074, highly similar to 150 kDa oxygen-regulated protein;cDNA FLJ54708, highly similar to 150 kDa oxygen-regulated protein	Q9Y4L1;A8C1Z0;B3KXH0;B7Z602;B7Z766;Q05D91;Q68D25;Q6IN67;Q9BST8;B7Z2N4;B7Z909	0	1	2	1	0	1	2	3	2	2	0	1	4.2	111.33	999	5864	38541	238330	220350	0	0
38	IPI00000948;IPI00927538	Transducin beta-like protein 2;Williams-Beuren syndrome chromosomal region 13 protein;WS beta-transducin repeats protein;cDNA, FLJ95314, highly similar to Homo sapiens transducin (beta)-like 2 (TBL2), transcript variant 1, mRNA;cDNA FLJ90138 fis, clone HEMBB1000905, weakly similar to TRANSCRIPTIONAL REPRESSOR RCO-1;TBL2 protein;cDNA FLJ55528, highly similar to Transducin beta-like 2 protein;cDNA …	TBL2;UNQ563/PRO1125;WBSCR13	Transducin beta-like protein 2;cDNA FLJ55528, highly similar to Transducin beta-like 2 protein	Q9Y4P3;B2RB52;Q8N2L6;Q96E41;B4DY50;B4DY59	0	1	1	0	0	0	0	1	1	1	0	0	2.9	49.797	447	0	52951	216540	157450	0	0
39	IPI00001159	GCN1-like protein 1;Translational activator GCN1;cDNA FLJ54481, highly similar to GCN1-like protein 1	GCN1L1;KIAA0219	Translational activator GCN1	Q92616;B4DM32	0	1	0	1	1	0	0	1	0	1	1	0	0.8	292.74	2671	0	60458	0	43710	0	0
40	IPI00001453	66 kDa neurofilament protein;Alpha-internexin;Neurofilament 5;cDNA FLJ57501, highly similar to Alpha-internexin;Internexin neuronal intermediate filament protein, alpha variant	INA;NEF5	Alpha-internexin	Q16352;B4DE66;Q59EM6	0	0	0	1	0	0	1	1	0	1	0	0	3.6	55.39	499	155.93	526.81	0	349860	0	0
41	IPI00001466;IPI00940934;IPI00854834;IPI00893067;IPI00913926	Echinoderm microtubule-associated protein-like 4;Restrictedly overexpressed proliferation-associated protein;Ropp 120;EML4 protein;Putative uncharacterized protein EML4;cDNA FLJ55069, highly similar to Echinoderm microtubule-associated protein-like 4	C2orf2;EMAPL4;EML4	Echinoderm microtubule-associated protein-like 4;109 kDa protein;echinoderm microtubule associated protein like 4 isoform b;Putative uncharacterized protein EML4;Putative uncharacterized protein EML4	Q9HC35;A6H8Y6;B5MCW9;B5MBZ0;B4DIT9;B5MD40	0	0	2	0	1	0	1	0	1	0	1	0	2.1	108.9	981	1489.3	0	56581	0	0	0
42	IPI00873829;IPI00001539	3-ketoacyl-CoA thiolase, mitochondrial;Acetyl-CoA acyltransferase;Beta-ketothiolase;Mitochondrial 3-oxoacyl-CoA thiolase;T1;cDNA, FLJ95265, highly similar to Homo sapiens acetyl-Coenzyme A acyltransferase 2 (mitochondrial 3-oxoacyl-Coenzyme A thiolase) (ACAA2), nuclear gene encoding mitochondrial protein, mRNA;cDNA FLJ30111 fis, clone BNGH42000360, highly similar to 3-ketoacyl-CoA thiolase, mitoc…	ACAA2	Putative uncharacterized protein ACAA2 (Fragment);3-ketoacyl-CoA thiolase, mitochondrial	A8MVT9;P42765;B2RB23;B3KNP8	0	2	2	1	6	6	3	1	4	2	5	5	14.6	41.928	397	419310	247460	380100	429510	214080	484430
43	IPI00001589	Mitochondrial import inner membrane translocase subunit Tim13	TIM13B;TIMM13;TIMM13A;TIMM13B	Mitochondrial import inner membrane translocase subunit Tim13	Q9Y5L4	1	0	1	1	1	0	1	1	1	1	2	0	28.4	10.5	95	152480	77993	144950	221260	31714	0
44	IPI00001639;IPI00922792	Importin subunit beta-1;Importin-90;Karyopherin subunit beta-1;Nuclear factor p97;Pore targeting complex 97 kDa subunit;cDNA, FLJ95650, highly similar to Homo sapiens karyopherin (importin) beta 1 (KPNB1), mRNA;cDNA FLJ50715, highly similar to Importin beta-1 subunit;cDNA, FLJ79320, highly similar to Importin beta-1 subunit;cDNA FLJ50625, highly similar to Importin beta-1 subunit	KPNB1;NTF97	Importin subunit beta-1;cDNA FLJ50625, highly similar to Importin beta-1 subunit	Q14974;B2RBR9;B7Z752;B7ZAV6;Q53XN2;B7Z5M1	0	3	2	2	1	2	1	4	2	2	3	2	5.9	97.169	876	105810	482640	641320	433730	40246	87492
45	IPI00001676;IPI00290543	Nuclear protein localization protein 4 homolog;cDNA FLJ57969, highly similar to Nuclear protein localization protein 4 homolog	KIAA1499;NPL4;NPLOC4	Isoform 2 of Nuclear protein localization protein 4 homolog;Isoform 1 of Nuclear protein localization protein 4 homolog	Q8TAT6-2;Q8TAT6;B4DG89;Q8TAT6-1	0	0	0	1	0	0	1	0	0	1	0	0	2.8	69.46	617	15784	0	0	21354	0	0
46	IPI00001699;IPI00221360;IPI00221362	Apoptosis-associated speck-like protein containing a CARD;Caspase recruitment domain-containing protein 5;PYD and CARD domain-containing protein;Target of methylation-induced silencing 1;cDNA, FLJ95208, highly similar to Homo sapiens PYD and CARD domain containing (PYCARD), transcript variant 1, mRNA	ASC;CARD5;PYCARD;TMS1	Isoform 1 of Apoptosis-associated speck-like protein containing a CARD;Isoform 2 of Apoptosis-associated speck-like protein containing a CARD;Isoform 3 of Apoptosis-associated speck-like protein containing a CARD	Q9ULZ3-1;Q9ULZ3;B2RAZ4;Q9ULZ3-2;Q9ULZ3-3	0	0	0	0	1	0	0	1	0	0	1	1	5.6	21.627	195	0	6163	0	0	94596	240640
47	IPI00922511;IPI00001754;IPI00922549	cDNA FLJ54854, highly similar to Junctional adhesion molecule A;Junctional adhesion molecule 1;Junctional adhesion molecule A;Platelet adhesion molecule 1;Platelet F11 receptor;cDNA FLJ90671 fis, clone PLACE1005544, highly similar to Junctional adhesion molecule 1;F11 receptor;F11 receptor protein;F11 receptor, isoform CRA_c;F11R protein;JAM1;cDNA FLJ59609, highly similar to Junctional adhesion m…	F11R;JAM1;JCAM;UNQ264/PRO301;hCG_20857;RP11-544M22.2-001	cDNA FLJ54854, highly similar to Junctional adhesion molecule A;Junctional adhesion molecule A;cDNA FLJ59609, highly similar to Junctional adhesion molecule A	B7Z5W1;Q9Y624;Q6FIB4;B7Z941	0	1	0	0	0	0	0	1	1	0	0	0	2.6	32.858	303	0	18105	4210	0	0	0
48	IPI00001960;IPI00903323	Chloride intracellular channel protein 4;Intracellular chloride ion channel protein p64H1;cDNA FLJ61180, highly similar to Chloride intracellular channel protein 4;cDNA, FLJ96000, Homo sapiens chloride intracellular channel 4 (CLIC4), mRNA;Chloride intracellular channel 4;Chloride intracellular channel 4, isoform CRA_b;CLIC4 protein;cDNA FLJ10762 fis, clone NT2RP4000008, moderately similar to CHL…	CLIC4;hCG_24047;RP11-108J9.1-001	Chloride intracellular channel protein 4;cDNA FLJ38640 fis, clone HHDPC2003472, highly similar to CHLORIDE INTRACELLULAR CHANNEL PROTEIN 4	Q9Y696;B4DWC4;Q6FIC5;Q9NVF8;B3KTR3	0	1	0	0	0	0	0	1	0	0	0	0	4.3	28.772	253	0	77477	0	0	0	0
49	IPI00909904;IPI00002212;IPI00640104;IPI00945940;IPI00012093;IPI00893500;IPI00911046;IPI00292827;IPI00947554;IPI00844141;IPI00182383;IPI00893092;IPI00760722;IPI00893361;IPI00552426;IPI00893689;IPI00892997;IPI00894210;IPI00893536;IPI00892960	Mammalian STE20-like protein kinase 3;Serine/threonine-protein kinase 24;STE20-like kinase MST3;cDNA FLJ60706, highly similar to Serine/threonine-protein kinase 24 (EC 2.7.11.1);cDNA FLJ61159, highly similar to Serine/threonine-protein kinase 24 (EC 2.7.11.1);cDNA FLJ61383, highly similar to Serine/threonine-protein kinase 24 (EC 2.7.11.1);Serine/threonine kinase 24 (STE20 homolog, yeast);Serine/…	MST3;STK24;STK3;hCG_27759;RP11-111L24.5-001;RP11-111L24.5-003;SOK1;STK25;YSK1;MASK;MST4;hCG_1783468;RP6-213H19.1;DKFZp686J1430;RP11-111L24.5-005	cDNA FLJ61383, highly similar to Serine/threonine-protein kinase 24;Isoform B of Serine/threonine-protein kinase 24;Serine/threonine kinase 24;cDNA, FLJ79036, highly similar to Serine/threonine-protein kinase MST4;Serine/threonine-protein kinase 25;STK25 p	Q9Y6E0-2;Q9Y6E0;B4DMR0;B4DR80;B4DT57;Q5U0E6;Q9Y6E0-1;Q5JV92;Q6FG81;Q6P0Y1;Q5JV93;B4E0Y9;O00506;B3KRS6;B4DVS7;Q96BA2;Q9P289;Q499L9;Q8NBY1;C9JGW8;Q9BXC3;A8K6Z3;B4DMA5;B4E185;B7Z9K1;Q5CZ67;Q8NC04;Q96SR7;Q9NWX4;C9JFU5;Q5JV98;C9J232;C9JCC0;C9J6L2;C9JDH9;C9JJV0	0	0	1	0	1	0	0	1	1	1	1	0	6	49.997	450	0	48657	62412	59140	0	0
50	IPI00328195;IPI00872127;IPI00002255;IPI00945818;IPI00787169	Lysosomal-trafficking regulator 2;Neurobeachin;Protein BCL8B;cDNA FLJ16538 fis, clone OCBBF2033295, highly similar to Protein neurobeachin;Neurobeachin, isoform CRA_e;Putative uncharacterized protein DKFZp686I03263;cDNA FLJ45892 fis, clone OCBBF3023175, highly similar to Protein neurobeachin;Beige-like protein;CDC4-like protein;Lipopolysaccharide-responsive and beige-like anchor protein;cDNA FLJ1…	BCL8B;KIAA1544;LYST2;NBEA;hCG_2019985;RP11-270C18.1-001;DKFZp686I03263;BGL;CDC4L;LBA;LRBA;DKFZp686K03100	Isoform 1 of Neurobeachin;neurobeachin;Isoform 1 of Lipopolysaccharide-responsive and beige-like anchor protein;Isoform 2 of Lipopolysaccharide-responsive and beige-like anchor protein;Similar to Protein neurobeachin	Q8NFP9-1;Q8NFP9;B3KVG9;Q5T321;Q6N008;B3KXQ8;P50851-1;P50851;B3KVI6;Q59HC1;Q68D03;Q6P1X2;Q7KZN3;Q969R7;P50851-2	0	0	0	1	0	0	0	0	0	1	0	0	0.4	327.86	2946	0	0	0	39009	0	0
51	IPI00002375;IPI00645850;IPI00872080	Erythrocyte tropomodulin;Tropomodulin-1;cDNA, FLJ95355, highly similar to Homo sapiens tropomodulin 1 (TMOD1), mRNA;cDNA FLJ38429 fis, clone FEBRA2013465, highly similar to Tropomodulin-1;Tropomodulin 1	D9S57E;TMOD;TMOD1;RP11-244N9.1-002	Tropomodulin-1;cDNA FLJ38429 fis, clone FEBRA2013465, highly similar to Tropomodulin-1;Putative uncharacterized protein TMOD1 (Fragment)	P28289;B2RB77;Q5T7W3;A8MVS9	0	0	0	0	0	1	0	0	0	0	1	1	3.1	40.569	359	0	0	0	0	2487.6	54588
52	IPI00002406;IPI00554618	Auberger B antigen;Basal cell adhesion molecule;B-CAM cell surface glycoprotein;F8/G253 antigen;Lutheran antigen;Lutheran blood group glycoprotein;Lutheran glycoprotein;Lutheran blood group	BCAM;LU;MSK19	Basal cell adhesion molecule;basal cell adhesion molecule isoform 2 precursor	P50895;A9LST5;A9YWT4;A9YWT7;D0AB07	1	1	0	1	2	2	2	1	1	2	3	3	5.7	67.404	628	214060	15438	17956	255890	94156	108230
53	IPI00514424;IPI00002412;IPI00908718;IPI00514996	Palmitoyl-protein thioesterase 1;Palmitoyl-protein hydrolase 1;cDNA, FLJ92589, Homo sapiens palmitoyl-protein thioesterase 1(ceroid-lipofuscinosis, neuronal 1, infantile) (PPT1), mRNA;Palmitoyl-protein thioesterase 1 (Ceroid-lipofuscinosis, neuronal 1, infantile), isoform CRA_a;PPT1 protein;cDNA FLJ53679, highly similar to Palmitoyl-protein thioesterase 1 (EC 3.1.2.22)	PPT1;RP11-115D7.2-002;PPT;hCG_1775981;RP11-115D7.2-001;RP11-115D7.2-004	Palmitoyl-protein thioesterase 1;Palmitoyl-protein thioesterase 1;palmitoyl-protein thioesterase 1 isoform 2 precursor;Palmitoyl-protein thioesterase 1	Q5T0S6;P50897;Q6FGQ4;B4DY24;Q5T0S0	0	0	0	0	1	1	0	1	0	0	1	1	4.5	37.131	335	0	14024	0	0	129630	27308
54	IPI00002459;IPI00221226;IPI00442825	Annexin A6, isoform CRA_c;Putative uncharacterized protein ANXA6;67 kDa calelectrin;Annexin A6;Annexin VI;Annexin-6;Calphobindin-II;Chromobindin-20;Lipocortin VI;p68;p70;Protein III;cDNA FLJ75116, highly similar to Homo sapiens annexin A6, transcript variant 1, mRNA;cDNA FLJ53638, highly similar to Annexin A6;cDNA FLJ53686, highly similar to Annexin A6	ANXA6;hCG_39152;ANX6	annexin VI isoform 2;Annexin A6	A6NN80;P08133;A8K3Q7;B7Z582;B7Z8A7	2	8	4	6	15	8	4	9	5	6	15	12	26.2	75.276	667	1734500	9610300	344980	573550	716140	516950
55	IPI00002460;IPI00021771;IPI00953297	Annexin A7;Annexin VII;Annexin-7;Synexin;cDNA, FLJ92798, highly similar to Homo sapiens annexin A7 (ANXA7), transcript variant 2, mRNA;cDNA, FLJ93494, highly similar to Homo sapiens annexin A7 (ANXA7), transcript variant 1, mRNA;Annexin VII isoform 1 variant;cDNA FLJ54149, highly similar to Annexin A7;cDNA FLJ54191, highly similar to Annexin A7;cDNA FLJ55060, highly similar to Annexin A7	ANX7;ANXA7;OK/SW-cl.95;SNX	Isoform 1 of Annexin A7;Isoform 2 of Annexin A7;cDNA FLJ55060, highly similar to Annexin A7	P20073-1;P20073;B2R657;B2R7L2;Q53HM8;P20073-2;B4DT77;B4DWU2;B4DHY4	1	1	1	2	1	2	3	1	2	2	2	2	9.2	52.739	488	67321	106010	75910	200620	109310	25890
56	IPI00306791;IPI00807389;IPI00010555;IPI00513917;IPI00454951;IPI00514261;IPI00010554;IPI00334908;IPI00064591;IPI00514576;IPI00002491;IPI00654848;IPI00186452;IPI00454950;IPI00646306;IPI00426075;IPI00383430	c-Cbl-associated protein;Ponsin;SH3 domain protein 5;SH3P12;Sorbin and SH3 domain-containing protein 1;Putative uncharacterized protein SORBS1;Sorbin and SH3 domain containing 1;cDNA FLJ53322, highly similar to Homo sapiens sorbin and SH3 domain containing 1 (SORBS1), transcript variant 5, mRNA;cDNA FLJ53695, highly similar to Homo sapiens sorbin and SH3 domain containing 1 (SORBS1), transcript v…	KIAA0894;KIAA1296;SH3D5;SORBS1;RP11-476E15.1-005;RP11-476E15.1-008;RP11-476E15.1-006;RP11-476E15.1-009;RP11-476E15.1-001;RP11-476E15.1-002;RP11-476E15.1-007;DKFZp686N08224	Sorbin and SH3 domain-containing protein 1;Ponsin;Isoform 2 of Sorbin and SH3 domain-containing protein 1;sorbin and SH3 domain containing 1 isoform 4;Isoform 5 of Sorbin and SH3 domain-containing protein 1;Sorbin and SH3 domain containing 1;Isoform 3 of S	Q9BX66-1;Q9BX66;A0AED4;Q9BX66-2;Q5T931;Q9BX66-5;Q5T927;Q9BX66-3;Q5T929;Q9BX66-6;B4DH45;B4E264;Q9BX66-8;Q5T932;Q9BX66-9;Q5T930;B4DTX5;Q9BX66-10;Q5T923;Q9BX66-4;Q5T928;Q6MZY5;Q9BX66-7	2	0	0	1	5	6	0	0	0	0	2	2	9.4	143.86	1305	1523700	28007	0	51497	391670	821450
57	IPI00456008;IPI00002521;IPI00794158	ATP synthase-coupling factor 6, mitochondrial	ATP5A;ATP5J;ATPM;hCG_2007844	ATP synthase, H+ transporting, mitochondrial F0 complex, subunit F6 isoform b precursor;ATP synthase-coupling factor 6, mitochondrial;Putative uncharacterized protein ATP5J	P18859;Q6IB54;Q6NZ59;A8MUH2	0	1	1	1	2	1	1	1	1	1	2	1	24.1	13.388	116	57122	139070	229480	498330	142950	61909
58	IPI00002745	Cathepsin P;Cathepsin X;Cathepsin Z	CTSZ	Cathepsin Z	Q9UBR2;Q5U000	0	2	0	1	1	0	1	2	2	2	1	1	10.6	33.868	303	0	474560	8842.5	594130	0	6861
59	IPI00002824;IPI00793531;IPI00792951;IPI00794630;IPI00791139	Cysteine and glycine-rich protein 2;Cysteine-rich protein 2;LIM domain only protein 5;Smooth muscle cell LIM protein	CSRP2;LMO5;SMLIM	Cysteine and glycine-rich protein 2;18 kDa protein;16 kDa protein;14 kDa protein;12 kDa protein	Q16527	1	0	0	0	0	0	1	0	0	1	0	0	5.2	20.954	193	25197	0	0	2690.9	0	0
60	IPI00002922;IPI00922336;IPI00925198;IPI00927546;IPI00927137;IPI00954226	F-box-like/WD repeat-containing protein TBL1XR1;Nuclear receptor corepressor/HDAC3 complex subunit TBLR1;TBL1-related protein 1;Transducin beta-like 1X-related protein 1;cDNA FLJ55712, highly similar to F-box-like/WD repeat protein TBL1XR1;Putative uncharacterized protein TBL1XR1	IRA1;TBL1XR1;TBLR1	F-box-like/WD repeat-containing protein TBL1XR1;cDNA FLJ55712, highly similar to F-box-like/WD repeat protein TBL1XR1;Putative uncharacterized protein TBL1XR1;Putative uncharacterized protein TBL1XR1;Putative uncharacterized protein TBL1XR1;Putative unchar	Q9BZK7;B7Z475;C9IYU9;C9JBN1;C9JCK0;C9JLJ1	0	0	0	0	0	1	1	1	1	1	0	1	4.5	55.594	514	107880	73594	355480	98486	0	7302.9
61	IPI00002966;IPI00031022	Heat shock 70 kDa protein 4;Heat shock 70-related protein APG-2;HSP70RY;cDNA, FLJ79511, highly similar to Heat shock 70 kDa protein 4;cDNA, FLJ79520, highly similar to Heat shock 70 kDa protein 4;cDNA, FLJ79524, highly similar to Heat shock 70 kDa protein 4;cDNA, FLJ79536, highly similar to Heat shock 70 kDa protein 4;cDNA FLJ50510, highly similar to Heat shock 70 kDa protein 4;cDNA FLJ52593, hig…	APG2;HSPA4;HS24/p52;HS24/P52	Heat shock 70 kDa protein 4	P34932;B0AZS1;B0AZT0;B0AZU6;B4DH02;B4DIZ3;B4DN48;B4DSE8;B4DT47;B4DUS3;B4E0H6;B4E354;O14992;Q59GF8;Q7KYN0	0	3	3	0	5	3	2	5	4	4	5	6	11.8	94.33	840	214230	328840	1044900	422350	429460	82394
62	IPI00927044;IPI00003309;IPI00927876;IPI00924545;IPI00791273;IPI00790361	Putative uncharacterized protein POLR2H;DNA-directed RNA polymerase II subunit H;DNA-directed RNA polymerases I, II, and III 17.1 kDa polypeptide;DNA-directed RNA polymerases I, II, and III subunit RPABC3;RPB17;RPB8 homolog	POLR2H	Putative uncharacterized protein POLR2H;DNA-directed RNA polymerases I, II, and III subunit RPABC3;Putative uncharacterized protein POLR2H;Putative uncharacterized protein POLR2H;9 kDa protein;5 kDa protein	C9JCU7;P52434;C9JLU1;C9JBJ6	0	1	0	0	0	0	0	1	0	1	0	0	7.4	19.767	175	0	87476	0	19265	0	0
63	IPI00003320	UPF0197 transmembrane protein C11orf10	C11orf10;HSPC005	UPF0197 transmembrane protein C11orf10	P61165	0	1	0	0	0	0	1	1	1	1	0	0	10.1	9.0788	79	189590	127190	109070	164800	0	0
64	IPI00003348;IPI00790302;IPI00790896;IPI00925530;IPI00797969;IPI00029143;IPI00386304;IPI00924758;IPI00946201;IPI00642117	G protein subunit beta-2;Guanine nucleotide-binding protein G(I)/G(S)/G(T) subunit beta-2;Transducin beta chain 2;cDNA FLJ77321, highly similar to Homo sapiens guanine nucleotide binding protein (G protein), beta polypeptide 2 (GNB2), mRNA;GNB2 protein;Guanine nucleotide binding protein (G protein), beta polypeptide 2, isoform CRA_a;Putative uncharacterized protein GNB2	GNB2;hCG_20449	Guanine nucleotide-binding protein G(I)/G(S)/G(T) subunit beta-2;Putative uncharacterized protein GNB2;Putative uncharacterized protein GNB2;32 kDa protein;Putative uncharacterized protein GNB2	P62879;Q6FHM2;C9JXA5;C9JIS1;C9JZN1	1	1	1	2	5	2	0	0	0	0	2	1	19.1	37.331	340	1281100	294890	600460	1369200	2582000	935650
65	IPI00003362	78 kDa glucose-regulated protein;Endoplasmic reticulum lumenal Ca(2+)-binding protein grp78;Heat shock 70 kDa protein 5;Immunoglobulin heavy chain-binding protein;cDNA FLJ60062, highly similar to 78 kDa glucose-regulated protein;HSPA5 protein	GRP78;HSPA5	HSPA5 protein	P11021;B4DEF7;Q2KHP4	3	10	6	4	8	12	4	8	7	7	10	9	22.3	72.421	655	911570	11718000	7196800	1122300	2737300	2017800
66	IPI00003377;IPI00916448;IPI00917346;IPI00744364;IPI00939530;IPI00943308	Splicing factor 9G8;Splicing factor, arginine/serine-rich 7;Aging-associated protein 3;Arginine/serine-rich splicing factor 7 type B;Putative uncharacterized protein SFRS7;Splicing factor, arginine/serine-rich 7, 35kDa;Splicing factor, arginine/serine-rich 7, 35kDa, isoform CRA_d;cDNA FLJ60677, highly similar to Splicing factor, arginine/serine-rich 7;cDNA FLJ59182, highly similar to Splicing fac…	SFRS7;9g8;AAG3;hCG_15878	Isoform 1 of Splicing factor, arginine/serine-rich 7;Putative uncharacterized protein SFRS7;cDNA FLJ60677, highly similar to Splicing factor, arginine/serine-rich 7;Putative uncharacterized protein SFRS7;cDNA FLJ34106 fis, clone FCBBF3008073, highly simila	Q16629-1;Q16629;Q564D3;C9JAB2;B4DLU6;C9J2H4;Q16629-3;A6NNE8;B4DEK2;Q16629-2;Q8NB80;C9JW27	0	2	1	1	1	3	1	2	1	1	2	2	8.8	27.366	238	58987	553580	1270100	228190	123100	127180
67	IPI00290006;IPI00872805;IPI00385903;IPI00410289;IPI00940396;IPI00748018;IPI00045033;IPI00410201;IPI00943042;IPI00874038;IPI00941934;IPI00922589;IPI00410294;IPI00409772;IPI00465229;IPI00942542;IPI00922313;IPI00382673;IPI00290003;IPI00410005;IPI00290007;IPI00045017;IPI00003402;IPI00410004;IPI00410295;IPI00410009;IPI00382671;IPI00156091;IPI00642143;IPI00410204	CD209 antigen;C-type lectin domain family 4 member L;Dendritic cell-specific ICAM-3-grabbing non-integrin 1;cDNA, FLJ94149, highly similar to Homo sapiens CD209 antigen (CD209), mRNA;CD209 antigen-like protein 1;C-type lectin domain family 4 member M;DC-SIGN-related protein;Dendritic cell-specific ICAM-3-grabbing non-integrin 2;Liver/lymph node-specific ICAM-3-grabbing non-integrin;CLEC4M protein…	CD209;CLEC4L;CD209L;CD209L1;CD299;CLEC4M;hCG_22558	Isoform 5 of CD209 antigen;Isoform 1 of CD209 antigen;Isoform 1 of C-type lectin domain family 4 member M;Isoform 2 of CD209 antigen;45 kDa protein;44 kDa protein;Isoform 6 of CD209 antigen;Isoform 10 of CD209 antigen;Putative uncharacterized protein CLEC4	Q9NNX6-5;Q9NNX6;A8MVQ9;Q9NNX6-1;B2R907;Q9H2X3-1;Q9H2X3;Q2TB20;Q9NNX6-2;A6NK99;Q9NNX6-6;Q9NNX6-10;C9JAM0;Q9H2X3-8;A8MSV8;Q9NNX6-7;C9JXP3;Q9H2X3-11;B4E2Z5;Q9NNX6-11;Q9H2X3-5;Q9H2X3-3;Q9NNX6-3;Q9NNX6-12;Q9H2X3-9;Q9H2X3-2;Q9NNX6-8;Q9H2X3-7;Q9H2X3-6;B4DNV9;Q9H2X3-4;Q9H2X3-10;Q9NNX6-13	0	0	0	1	0	0	0	0	1	1	0	0	13.4	45.57	404	0	0	7440.1	81009	0	0
68	IPI00003411	Prostacyclin synthase;Prostaglandin I2 synthase	CYP8;CYP8A1;PTGIS;PGIS	Prostacyclin synthase	Q16647;Q6LEN0;Q6LEN2	0	0	0	0	1	0	0	0	0	0	1	0	2.4	57.103	500	0	0	0	0	84801	0
69	IPI00003443;IPI00217475;IPI00384836;IPI00909417;IPI00217474;IPI00643081;IPI00940508	Gamma-interferon-inducible protein 16;Interferon-inducible myeloid differentiation transcriptional activator;cDNA FLJ61295, highly similar to Gamma-interferon-inducible protein Ifi-16;Putative uncharacterized protein IFI16	IFI16;IFNGIP1	Isoform 1 of Gamma-interferon-inducible protein Ifi-16;Isoform 3 of Gamma-interferon-inducible protein Ifi-16;Isoform 4 of Gamma-interferon-inducible protein Ifi-16;cDNA FLJ61295, highly similar to Gamma-interferon-inducible protein Ifi-16;Gamma-interferon	Q16666-1;Q16666;Q16666-3;C9JGT9;Q16666-5;B4DJT8;Q16666-2;C9JXU0	1	1	2	0	0	1	1	2	2	1	1	1	3.8	88.255	785	43629	72328	190470	29951	51475	39583
70	IPI00387022;IPI00382577;IPI00827485;IPI00003469;IPI00385614;IPI00387027;IPI00387094;IPI00387099;IPI00387100;IPI00387101;IPI00398220;IPI00384398;IPI00930452;IPI00930489	Ig kappa chain V-I region AG;Kappa 1 light chain variable region;BRE;Ig kappa chain V-I region WEA;Ig kappa chain V-I region WAT;Ig kappa chain V-I region Gal;Ig kappa chain V-I region Hau;Ig kappa chain V-I region Rei;Ig kappa chain V-I region Roy;Ig kappa chain V-I region Scw;Anti-streptococcal/anti-myosin immunoglobulin kappa light chain variable region;Myosin-reactive immunoglobulin light cha…	SDNK1;A30	hypothetical protein;Kappa 1 light chain variable region (Fragment);BRE (Fragment);Ig kappa chain V-I region WEA;Ig kappa chain V-I region WAT;Ig kappa chain V-I region Gal;Ig kappa chain V-I region Hau;Ig kappa chain V-I region Rei;Ig kappa chain V-I regi	P01593;Q96PF6;A2NI60;P01610;P80362;P01599;P01600;P01607;P01608;P01609;Q96SA9;Q9UL77;Q9UL81;A2MYE1;A2MYE2	1	1	1	1	1	2	1	1	1	1	1	1	4.8	40.712	373	4868500	400910	517930	1906300	41476	401260
71	IPI00003470	Ig kappa chain V-I region Wes		Ig kappa chain V-I region Wes	P01611	1	0	0	1	0	1	1	0	1	1	0	1	16.7	11.608	108	616490	0	11040	192630	0	30002
72	IPI00003479;IPI00874012;IPI00018195;IPI00742900;IPI00304111	ERT1;Extracellular signal-regulated kinase 2;MAP kinase isoform p42;Mitogen-activated protein kinase 1;Mitogen-activated protein kinase 2;cDNA FLJ58314, highly similar to Mitogen-activated protein kinase 1 (EC 2.7.11.24);Mitogen-activated protein kinase 1, isoform CRA_a;Extracellular signal-regulated kinase-2 splice variant	ERK2;MAPK1;PRKM1;PRKM2;hCG_32557	Mitogen-activated protein kinase 1;Extracellular signal-regulated kinase-2 splice variant	P28482;B4DHN0;Q1HBJ4;Q499G7;A8CZ64	1	0	1	2	1	0	2	2	1	2	1	3	11.1	41.389	360	96802	19825	69966	212850	1064200	12301
73	IPI00003482	2,4-dienoyl-CoA reductase [NADPH];2,4-dienoyl-CoA reductase, mitochondrial;cDNA FLJ50204, highly similar to 2,4-dienoyl-CoA reductase, mitochondrial (EC 1.3.1.34);2,4-dienoyl-CoA reductase	DECR;DECR1	2,4-dienoyl-CoA reductase, mitochondrial	Q16698;B7Z6B8;Q7LDK6	0	1	3	1	3	3	1	1	3	1	3	3	17.3	36.067	335	365500	114010	177930	214310	121320	71130
74	IPI00003519;IPI00917777;IPI00903143	116 kDa U5 small nuclear ribonucleoprotein component;Elongation factor Tu GTP-binding domain-containing protein 2;SNU114 homolog;U5 snRNP-specific protein, 116 kDa;cDNA FLJ78483, highly similar to Homo sapiens elongation factor Tu GTP binding domain containing 2 (EFTUD2), mRNA;cDNA FLJ44500 fis, clone UTERU3000828, highly similar to 116 kDa U5 small nuclear ribonucleoprotein component;cDNA FLJ553…	EFTUD2;KIAA0031;SNRP116;U5-116KD	116 kDa U5 small nuclear ribonucleoprotein component;elongation factor Tu GTP binding domain containing 2 isoform b;cDNA FLJ44205 fis, clone THYMU3001379, highly similar to 116 kDa U5 small nuclear ribonucleoprotein component	Q15029;A8KAP3;B3KX19;B4DMC0;Q6IBM8;B4DK30;B4DZB1;Q8IXJ3;B3KWY2	0	0	0	0	0	1	0	0	0	0	1	1	2.4	109.43	972	0	0	0	0	20462	55773
75	IPI00003527;IPI00794755	Ezrin-radixin-moesin-binding phosphoprotein 50;Na(+)/H(+) exchange regulatory cofactor NHE-RF1;Regulatory cofactor of Na(+)/H(+) exchanger;Sodium-hydrogen exchanger regulatory factor 1;Solute carrier family 9 isoform A3 regulatory factor 1;cDNA, FLJ92860, highly similar to Homo sapiens solute carrier family 9 (sodium/hydrogen exchanger), member 3 regulator 1 (SLC9A3R1), mRNA;cDNA FLJ46618 fis, cl…	NHERF;NHERF1;SLC9A3R1;hCG_29833	Na(+)/H(+) exchange regulatory cofactor NHE-RF1;26 kDa protein	O14745;B2R6A3;B3KY21	0	2	1	0	0	0	0	2	1	1	2	1	5.9	38.868	358	0	346300	114810	78698	16326	8423.5
76	IPI00003588;IPI00913838	Aminoacyl tRNA synthetase complex-interacting multifunctional protein 3;Elongation factor p18;Eukaryotic translation elongation factor 1 epsilon-1;Multisynthase complex auxiliary component p18;Putative uncharacterized protein EEF1E1	AIMP3;EEF1E1;P18	Eukaryotic translation elongation factor 1 epsilon-1;eukaryotic translation elongation factor 1 epsilon 1 isoform 2	O43324;C9JLK5	0	0	1	0	0	1	0	1	1	1	1	1	6.3	19.81	174	0	83995	433100	25080	13875	15036
77	IPI00003627;IPI00216622;IPI00790197	53 kDa BRG1-associated factor A;Actin-like protein 6A;Actin-related protein Baf53a;ArpNbeta;BRG1-associated factor 53A;INO80 complex subunit K;Actin-like 6A isoform 1 variant;BAF53A protein	ACTL6A;BAF53;BAF53A;INO80K	Isoform 1 of Actin-like protein 6A;Isoform 2 of Actin-like protein 6A;8 kDa protein	O96019-1;O96019;Q53FS0;Q6FI97;O96019-2	0	1	1	0	1	1	0	1	1	1	1	1	2.3	47.46	429	0	771560	38801	14502	112350	84543
78	IPI00003766	Ethylmalonic encephalopathy protein 1;Hepatoma subtracted clone one protein;Protein ETHE1, mitochondrial;cDNA, FLJ96390, highly similar to Homo sapiens protein expressed in thyroid (YF13H12), mRNA;Ethylmalonic encephalopathy 1, isoform CRA_a	ETHE1;HSCO;hCG_1995670	Protein ETHE1, mitochondrial	O95571;B2RCZ7	0	1	2	1	4	2	2	1	2	1	5	2	26.8	27.873	254	9072.1	181610	34488	470510	10148000	151530
79	IPI00794402;IPI00796541;IPI00003815;IPI00793767;IPI00791180;IPI00797560;IPI00797924	Rho GDP-dissociation inhibitor 1;Rho-GDI alpha	ARHGDIA;GDIA1	28 kDa protein;26 kDa protein;Rho GDP-dissociation inhibitor 1;22 kDa protein;9 kDa protein	P52565;B2R5X1;Q6IBM5	0	0	1	0	2	1	0	1	1	0	3	1	14.5	27.518	249	0	153890	521910	0	169910	113680
80	IPI00003817;IPI00792758;IPI00792537;IPI00791712	Ly-GDI;Rho GDP-dissociation inhibitor 2;Rho-GDI beta;cDNA, FLJ92068, highly similar to Homo sapiens Rho GDP dissociation inhibitor (GDI) beta (ARHGDIB),mRNA	ARHGDIB;GDIA2;GDID4;RAP1GN1	Rho GDP-dissociation inhibitor 2;21 kDa protein;21 kDa protein;13 kDa protein	P52566;B2R4F3;B5BU79	0	2	3	1	2	1	0	2	2	1	3	2	17.4	22.988	201	0	875550	2651200	273550	101790	91654
81	IPI00003856;IPI00719806;IPI00719366;IPI00059139	Vacuolar proton pump subunit E 1;V-ATPase 31 kDa subunit;V-type proton ATPase subunit E 1;ATPase, H+ transporting, lysosomal 31kDa, V1 subunit E isoform 1;ATPase, H+ transporting, lysosomal 31kDa, V1 subunit E1, isoform CRA_b;cDNA, FLJ92725, Homo sapiens ATPase, H+ transporting, lysosomal 31kDa, V1 subunit Eisoform 1 (ATP6V1E1), mRNA;cDNA FLJ51833, highly similar to Homo sapiens ATPase, H+ transp…	ATP6E;ATP6E2;ATP6V1E1;hCG_21530;ATP6E1;ATP6EL2;ATP6V1E2;ATP6V1EL2	V-type proton ATPase subunit E 1;vacuolar H+ ATPase E1 isoform b;vacuolar H+ ATPase E1 isoform c;V-type proton ATPase subunit E 2	P36543;Q53Y06;A8MUE4;A8MUN4;Q96A05	0	1	1	0	0	0	0	2	1	1	0	0	8	26.145	226	0	243560	61485	20977	0	0
82	IPI00003865;IPI00037070;IPI00939595;IPI00910870;IPI00844513;IPI00877807;IPI00880019;IPI00844564	Heat shock 70 kDa protein 8;Heat shock cognate 71 kDa protein;cDNA FLJ77848;cDNA FLJ38781 fis, clone LIVER2000216, highly similar to HEAT SHOCK COGNATE 71 kDa PROTEIN;cDNA FLJ55485, highly similar to Heat shock cognate 71 kDa protein;Heat shock 70kDa protein 8 isoform 1 variant;Putative uncharacterized protein;HSPA8 protein;cDNA FLJ20564 fis, clone KAT12033;Uncharacterized bone marrow protein BM0…	HSC70;HSP73;HSPA10;HSPA8	Isoform 1 of Heat shock cognate 71 kDa protein;54 kDa protein;Isoform 2 of Heat shock cognate 71 kDa protein;cDNA FLJ59163, highly similar to Heat shock cognate 71 kDa protein	P11142-1;P11142;A8K7Q2;B3KTV0;B4E1Q1;Q53GZ6;Q96BE0;Q96H53;Q96IS6;Q9NWW3;Q9NZ87;P11142-2;Q53HF2;B4DTX2	2	6	5	4	20	11	4	6	6	3	9	8	26.3	70.897	646	1673400	12547000	21993000	773320	2518800	1377300
83	IPI00003870	Endopeptidase Clp;Putative ATP-dependent Clp protease proteolytic subunit, mitochondrial;ClpP caseinolytic peptidase ATP-dependent, proteolytic subunit	CLPP	Putative ATP-dependent Clp protease proteolytic subunit, mitochondrial	Q16740;A4UCS4	0	0	0	0	1	0	0	0	0	0	1	0	5.4	30.18	277	0	0	0	0	30694	0
84	IPI00003881	Heterogeneous nuclear ribonucleoprotein F;Heterogeneous nuclear ribonucleoprotein F, N-terminally processed;Nucleolin-like protein mcs94-1;cDNA FLJ57121, highly similar to Heterogeneous nuclear ribonucleoprotein F	HNRNPF;HNRPF;OK/SW-cl.23	Heterogeneous nuclear ribonucleoprotein F	P52597;B4DKS8;Q8NI96	1	1	1	1	1	0	1	1	1	1	1	0	3.1	45.671	415	311440	870970	787460	833330	163080	0
85	IPI00003918;IPI00795303;IPI00908662;IPI00878133;IPI00908376;IPI00792159;IPI00953651	60S ribosomal protein L1;60S ribosomal protein L4;cDNA FLJ56689, highly similar to 60S ribosomal protein L4;Ribosomal protein L4 variant;cDNA FLJ50996, highly similar to 60S ribosomal protein L4;cDNA FLJ50994, moderately similar to 60S ribosomal protein L4	RPL1;RPL4	60S ribosomal protein L4;cDNA FLJ50996, highly similar to 60S ribosomal protein L4;cDNA FLJ50994, moderately similar to 60S ribosomal protein L4;26 kDa protein	P36578;B4DFI6;Q53G74;Q59GY2;B4DMJ6;B4DMJ2	2	1	3	3	5	1	1	3	4	3	6	3	15.2	47.697	427	3040600	309800	3085400	262160	271580	1026600
86	IPI00003925;IPI00946404;IPI00549885;IPI00947129;IPI00798351;IPI00947319;IPI00555722	Pyruvate dehydrogenase E1 component subunit beta, mitochondrial;cDNA FLJ52988, highly similar to Pyruvate dehydrogenase E1 component subunit beta, mitochondrial (EC 1.2.4.1);Putative uncharacterized protein PDHB	PDHB;PHE1B	Isoform 1 of Pyruvate dehydrogenase E1 component subunit beta, mitochondrial;cDNA FLJ52988, highly similar to Pyruvate dehydrogenase E1 component subunit beta, mitochondrial;Isoform 2 of Pyruvate dehydrogenase E1 component subunit beta, mitochondrial;Putat	P11177-1;P11177;B2R7L0;B4DDD7;P11177-2;C9J634;C9K0U7	0	2	1	0	4	2	0	2	2	0	4	4	15	39.233	359	0	181910	259330	0	491170	174330
87	IPI00003933;IPI00745553;IPI00909928	Glyoxalase II;Hydroxyacylglutathione hydrolase, mitochondrial;cDNA FLJ60347, highly similar to Homo sapiens hydroxyacylglutathione hydrolase (HAGH), transcript variant 1, mRNA;cDNA FLJ50821, highly similar to Homo sapiens hydroxyacylglutathione hydrolase (HAGH), transcript variant 1, mRNA	GLO2;HAGH;HAGH1	Isoform 1 of Hydroxyacylglutathione hydrolase, mitochondrial;Isoform 2 of Hydroxyacylglutathione hydrolase, mitochondrial;cDNA FLJ50821, highly similar to Homo sapiens hydroxyacylglutathione hydrolase (HAGH), transcript variant 1, mRNA	Q16775-1;Q16775;B4DT01;Q16775-2;B4DP33	0	1	0	0	0	0	0	1	0	0	0	1	3.9	33.805	308	0	49725	0	0	0	25691
88	IPI00003949;IPI00874051;IPI00376844;IPI00796342;IPI00796917	Bendless-like ubiquitin-conjugating enzyme;Ubc13;Ubiquitin carrier protein N;Ubiquitin-conjugating enzyme E2 N;Ubiquitin-protein ligase N;Putative ubiquitin-conjugating enzyme E2 N-like	BLU;UBE2N;UBE2NL	Ubiquitin-conjugating enzyme E2 N;Ubiquitin carrier protein (Fragment);Putative ubiquitin-conjugating enzyme E2 N-like;11 kDa protein	P61088;A8MUJ2;Q5JXB2	1	4	4	1	2	2	1	3	3	1	3	3	23	17.138	152	746180	1244300	587610	700620	39123	160770
89	IPI00003968;IPI00792728;IPI00797098	Complex I-39kD;NADH dehydrogenase [ubiquinone] 1 alpha subcomplex subunit 9, mitochondrial;NADH-ubiquinone oxidoreductase 39 kDa subunit;cDNA FLJ75930, highly similar to Homo sapiens NADH dehydrogenase (ubiquinone) 1 alpha subcomplex, 9, 39kDa (NDUFA9), mRNA;Similar to NADH dehydrogenase (Ubiquinone) 1 alpha subcomplex, 9 (39kD)	NDUFA9;NDUFS2L	NADH dehydrogenase [ubiquinone] 1 alpha subcomplex subunit 9, mitochondrial;17 kDa protein;8 kDa protein	Q16795;A8K4V2;Q9BTT5	0	0	0	0	2	1	0	0	0	0	2	2	5.3	42.509	377	0	0	0	0	167100	24438
90	IPI00003971;IPI00219812;IPI00219813;IPI00794113	Neuroendocrine-specific protein;Reticulon-1;Reticulon 1 isoform A;RTN1 protein;cDNA FLJ76256, highly similar to Homo sapiens reticulon 1 (RTN1), transcript variant 3, mRNA;cDNA FLJ55108, highly similar to Reticulon-1;Putative uncharacterized protein RTN1	NSP;RTN1	Isoform RTN1-A of Reticulon-1;Isoform RTN1-B of Reticulon-1;Isoform RTN1-C of Reticulon-1;Putative uncharacterized protein RTN1	Q16799-1;Q16799;Q2L7A7;Q2NKQ5;Q16799-2;Q16799-3;A8K3B9;B7Z4K5;Q6IAX4;Q9BQ59;A8MT72	1	2	1	0	2	1	1	1	1	1	2	2	2.3	83.617	776	315030	554380	1025600	211210	378160	317320
91	IPI00218442;IPI00303760;IPI00004092;IPI00218440;IPI00748794;IPI00478023	Calcium pump 3;Sarcoplasmic/endoplasmic reticulum calcium ATPase 3;Putative uncharacterized protein ATP2A3;cDNA FLJ77199, highly similar to Homo sapiens ATPase, Ca++ transporting, ubiquitous (ATP2A3), transcript variant 6, mRNA	ATP2A3	Putative uncharacterized protein ATP2A3;ATPase, Ca++ transporting, ubiquitous isoform e;Isoform SERCA3B of Sarcoplasmic/endoplasmic reticulum calcium ATPase 3;Isoform SERCA3C of Sarcoplasmic/endoplasmic reticulum calcium ATPase 3;Isoform SERCA3A of Sarcopl	Q93084-6;Q93084;A8MYK9;Q93084-5;Q93084-1;Q93084-3;Q93084-2;A8K9K1;Q93084-4;A8MZG0	0	0	0	0	1	0	0	0	1	0	1	0	3.4	114.87	1052	0	0	25452	0	70327	0
92	IPI00004358;IPI00789185;IPI00783313;IPI00218130;IPI00943894;IPI00657751	Glycogen phosphorylase, brain form;Phosphorylase	PYGB	Glycogen phosphorylase, brain form	P11216;B4DSD8;Q59GM9	0	1	0	2	5	2	1	1	0	2	5	7	11.7	96.695	843	174100	756080	0	533210	701360	154660
93	IPI00004363	DCHT;Serine/threonine-protein kinase 39;STE20/SPS1-related proline-alanine-rich protein kinase;Putative uncharacterized protein STK39;Small intestine SPAK-like kinase	SPAK;STK39	STE20/SPS1-related proline-alanine-rich protein kinase	Q9UEW8;Q53S90;Q53SL7;Q53SS1;Q6E0B2	0	0	0	1	0	0	0	1	0	1	0	0	2.7	59.642	547	0	2564.9	0	66023	0	0
94	IPI00004408;IPI00220754	Adducin-like protein 70;Gamma-adducin;Adducin 3 isoform a variant;Adducin 3 (Gamma);Adducin 3 (Gamma), isoform CRA_a;cDNA FLJ77558, highly similar to Homo sapiens adducin 3 (gamma) (ADD3), transcript variant 1, mRNA	ADD3;ADDL;hCG_1789399;RP11-252O7.3-001	Isoform 2 of Gamma-adducin;Isoform 1 of Gamma-adducin	Q9UEY8-1;Q9UEY8;Q53FL4;Q59EK1;Q5VU08;Q9UEY8-2;Q5VU09	0	0	0	0	1	0	0	0	0	0	1	0	1.7	79.154	706	0	0	0	0	40897	0
95	IPI00004457;IPI00024357;IPI00293889	Copper amine oxidase;HPAO;Membrane primary amine oxidase;Semicarbazide-sensitive amine oxidase;Vascular adhesion protein 1;Placenta copper monamine oxidase	AOC3;VAP1	Membrane primary amine oxidase	Q16853;Q9UEU7	3	0	0	1	8	11	3	2	2	3	5	6	8.7	84.621	763	458510	15813	183740	30197	6095600	8848200
96	IPI00004471;IPI00167134;IPI00015745	Actinin-associated LIM protein;Alpha-actinin-2-associated LIM protein;PDZ and LIM domain protein 3	ALP;PDLIM3	Isoform 1 of PDZ and LIM domain protein 3;Isoform 2 of PDZ and LIM domain protein 3;Isoform 3 of PDZ and LIM domain protein 3	Q53GG5-1;Q53GG5;Q53GG5-2;Q53GG5-3	0	0	0	0	2	1	1	1	0	0	2	1	7.1	39.232	364	0	11385	0	0	41560	187820
97	IPI00946714;IPI00004488;IPI00942404	Putative uncharacterized protein ATP6V1F;Vacuolar proton pump subunit F;V-ATPase 14 kDa subunit;V-type proton ATPase subunit F;ATPase, H+ transporting, lysosomal 14kDa, V1 subunit F;ATPase, H+ transporting, lysosomal 14kDa, V1 subunit F, isoform CRA_a;cDNA, FLJ92503, Homo sapiens ATPase, H+ transporting, lysosomal 14kDa, V1 subunit F(ATP6V1F), mRNA	ATP6V1F;ATP6S14;VATF;hCG_41657;tcag7.419	Putative uncharacterized protein ATP6V1F;V-type proton ATPase subunit F;14 kDa protein	C9J2K4;Q16864;A4D1K0	0	0	0	0	1	0	0	0	0	0	1	0	8.2	16.401	147	0	0	0	0	29235	0
98	IPI00004524;IPI00925681;IPI00925439;IPI00926799	Grancalcin;cDNA FLJ52146, highly similar to Grancalcin;Putative uncharacterized protein GCA	GCA;GCL	Grancalcin;22 kDa protein;Putative uncharacterized protein GCA;Putative uncharacterized protein GCA	P28676;B7Z322;C9JGR8;C9JMP3	0	0	1	0	0	0	0	1	1	0	1	0	5.1	24.01	217	0	3550.3	217260	0	2814.8	0
99	IPI00929344;IPI00004534	cDNA FLJ77779, highly similar to Homo sapiens phosphoribosylformylglycinamidine synthase (FGAR amidotransferase) (PFAS), mRNA;Phosphoribosylformylglycinamidine synthase (FGAR amidotransferase), isoform CRA_b;cDNA FLJ75059, highly similar to Homo sapiens phosphoribosylformylglycinamidine synthase (FGAR amidotransferase) (PFAS), mRNA;cDNA FLJ61288, highly similar to Phosphoribosylformylglycinamidin…	hCG_31283;PFAS;KIAA0361	phosphoribosylformylglycinamidine synthase;Phosphoribosylformylglycinamidine synthase	A8K8N7;A8K9T9;B4DJ26;Q6P4B4;Q9BR56;O15067	0	1	0	0	0	0	0	1	0	0	0	0	0.8	144.73	1338	0	36700	0	0	0	0
100	IPI00004573	Hepatocellular carcinoma-associated protein TB6;Polymeric immunoglobulin receptor;Secretory component	PIGR	Polymeric immunoglobulin receptor	P01833;Q8TE27	0	4	0	4	3	1	1	5	2	5	3	3	15.6	83.283	764	836370	2287600	13960	214190	45858	31750
101	IPI00004581;IPI00844532;IPI00643579	E74-like factor 3;Epithelial-restricted with serine box;Epithelium-restricted Ets protein ESX;Epithelium-specific Ets transcription factor 1;ETS-related transcription factor Elf-3;E74-like factor 3 (Ets domain transcription factor, epithelial-specific )	ELF3;ERT;ESX;JEN;RP11-510N19.1-004	Isoform 1 of ETS-related transcription factor Elf-3;Isoform 2 of ETS-related transcription factor Elf-3;E74-like factor 3	P78545-1;P78545;P78545-2;Q5SR36	0	0	0	0	0	1	0	0	0	0	1	1	2.2	41.454	371	0	0	0	0	13542	134230
102	IPI00796379;IPI00004656	cDNA FLJ57067, highly similar to Beta-2-microglobulin;Beta-2-microglobulin;Beta-2-microglobulin form pI 5.3	B2M;CDABP0092;HDCMA22P	cDNA FLJ57067, highly similar to Beta-2-microglobulin;Beta-2-microglobulin	B4E0X1;P61769;A6XND9	0	0	0	0	1	1	0	1	1	0	1	1	8.2	13.946	122	0	5876	4897.4	0	409080	183880
103	IPI00004845	Protein NipSnap homolog 3A;Protein NipSnap homolog 4;Target for Salmonella secreted protein C;cDNA FLJ58863, highly similar to Protein NipSnap3A	HSPC299;NIPSNAP3A;NIPSNAP4	Protein NipSnap homolog 3A	Q9UFN0;B4DW81	0	0	0	0	1	0	0	0	0	0	1	0	4	28.466	247	0	0	0	0	23869	0
104	IPI00004860	Arginine--tRNA ligase;Arginyl-tRNA synthetase, cytoplasmic;cDNA, FLJ95667, highly similar to Homo sapiens arginyl-tRNA synthetase (RARS), mRNA;cDNA FLJ50285, highly similar to Arginyl-tRNA synthetase (EC 6.1.1.19);Arginyl-tRNA synthetase variant	RARS	Isoform Complexed of Arginyl-tRNA synthetase, cytoplasmic	P54136-1;P54136;B2RBS9;B4DXW6;Q53GY4	0	1	0	0	1	0	0	1	0	0	1	1	1.4	75.378	660	0	219700	0	0	45279	16429
105	IPI00556451;IPI00004902	Electron transfer flavoprotein subunit beta;cDNA FLJ77343, highly similar to Homo sapiens electron-transfer-flavoprotein, beta polypeptide(ETFB), mRNA	ETFB;FP585	Isoform 2 of Electron transfer flavoprotein subunit beta;Isoform 1 of Electron transfer flavoprotein subunit beta	P38117-2;P38117;P38117-1;A8K766	0	0	0	0	2	0	0	1	0	0	2	2	5.2	37.434	346	0	19628	0	0	200500	80129
106	IPI00004968	Nuclear matrix protein 200;Pre-mRNA-processing factor 19;PRP19/PSO4 homolog;Senescence evasion factor	NMP200;PRP19;PRPF19;SNEV	Pre-mRNA-processing factor 19	Q9UMS4	0	0	0	0	0	2	1	0	0	0	2	2	4.2	55.18	504	24269	0	0	0	83861	53534
107	IPI00513827;IPI00895801;IPI00005040	Putative uncharacterized protein DKFZp686M24262;Acyl-Coenzyme A dehydrogenase, C-4 to C-12 straight chain;Acyl-Coenzyme A dehydrogenase, C-4 to C-12 straight chain, isoform CRA_a;Medium-chain specific acyl-CoA dehydrogenase, mitochondrial;cDNA FLJ52595, highly similar to Medium-chain specific acyl-CoA dehydrogenase, mitochondrial (EC 1.3.99.3);cDNA FLJ50422, highly similar to Medium-chain specifi…	DKFZp686M24262;ACADM;hCG_22915;RP4-682C21.1-002	Putative uncharacterized protein DKFZp686M24262;Isoform 2 of Medium-chain specific acyl-CoA dehydrogenase, mitochondrial;Isoform 1 of Medium-chain specific acyl-CoA dehydrogenase, mitochondrial	Q5HYG7;Q5T4U5;P11310-2;P11310;P11310-1;B4DJE7;B4DVB1;B4DVE0;B4DWX6;B7Z9I1	0	0	0	0	1	1	0	0	0	0	1	1	2.6	50.27	454	0	0	0	0	29655	112030
108	IPI00005087;IPI00005089;IPI00794581	Tropomodulin-3;Ubiquitous tropomodulin;Putative uncharacterized protein DKFZp686E1899;Neuronal tropomodulin;Tropomodulin-2;cDNA FLJ76964, highly similar to Homo sapiens tropomodulin 2 (neuronal) (TMOD2), mRNA;TMOD2 protein	TMOD3;DKFZp686E1899;NTMOD;TMOD2	Tropomodulin-3;Tropomodulin-2;34 kDa protein	Q9NYL9;Q5HYL6;Q9NZR1;A8K9L8;Q4G0W6	0	1	0	1	0	1	1	1	1	1	0	2	5.1	39.594	352	15329	306160	42015	134910	0	3801.1
109	IPI00555601;IPI00005118	Hexokinase 3 variant;Hexokinase type III;Hexokinase-3	HK3	Hexokinase 3 variant (Fragment);Hexokinase-3	Q59H08;P52790	0	2	1	0	0	0	1	2	2	1	0	0	2.2	102.44	960	18307	105060	53138	6632.2	0	0
110	IPI00005154	Chromatin-specific transcription elongation factor 80 kDa subunit;Facilitates chromatin transcription complex 80 kDa subunit;Facilitates chromatin transcription complex subunit SSRP1;FACT complex subunit SSRP1;Recombination signal sequence recognition protein 1;Structure-specific recognition protein 1;T160	FACT80;SSRP1	FACT complex subunit SSRP1	Q08945	0	1	1	1	1	1	1	1	1	1	1	1	2	81.074	709	41480	229670	389960	136180	10450	51203
111	IPI00470573;IPI00005159;IPI00176593;IPI00909247	cDNA FLJ51656, highly similar to Actin-like protein 2;Actin-like protein 2;Actin-related protein 2;ACTR2 protein;Putative uncharacterized protein ENSP00000380341;cDNA FLJ51655, highly similar to Actin-like protein 2	ACTR2;ARP2	actin-related protein 2 isoform a;Actin-related protein 2;Putative uncharacterized protein ENSP00000380341;cDNA FLJ51655, highly similar to Actin-like protein 2	B4DHK9;P61160;Q8IY98;A8MUT7;B4DWQ5	0	1	1	1	1	1	1	1	1	1	1	2	6	45.376	399	10847	50009	946570	38483	31055	7601.5
112	IPI00005161;IPI00000477;IPI00925920;IPI00926315;IPI00925705	Actin-related protein 2/3 complex subunit 2;Arp2/3 complex 34 kDa subunit;Actin related protein 2/3 complex, subunit 2, 34kDa, isoform CRA_a;cDNA FLJ76076, highly similar to Homo sapiens actin related protein 2/3 complex, subunit 2, 34kDa (ARPC2), transcript variant 2, mRNA;Putative uncharacterized protein ARPC2;PNAS-139	ARC34;ARPC2;PRO2446;hCG_16304	Actin-related protein 2/3 complex subunit 2;PNAS-139	O15144;Q53R19;Q9BXV5	1	2	1	3	5	2	2	5	3	4	6	5	21.3	34.333	300	298670	1096200	111860	308690	60559	39634
113	IPI00871870;IPI00005162;IPI00911088;IPI00794982	Actin-related protein 2/3 complex subunit 3;Arp2/3 complex 21 kDa subunit;cDNA, FLJ92050, highly similar to Homo sapiens actin related protein 2/3 complex, subunit 3, 21kDa (ARPC3), mRNA;Actin related protein 2/3 complex;cDNA FLJ51245, highly similar to Actin-related protein 2/3 complex subunit 3	ARC21;ARPC3	Putative uncharacterized protein ARPC3 (Fragment);Actin-related protein 2/3 complex subunit 3;cDNA FLJ51245, highly similar to Actin-related protein 2/3 complex subunit 3;8 kDa protein	A8MYY8;O15145;B2R4D5;Q2LE71;B4DM63	0	0	0	0	1	0	0	0	0	0	1	0	3.9	20.528	178	0	0	0	0	223540	0
114	IPI00005171;IPI00464948;IPI00936417;IPI00645572;IPI00909061;IPI00908657;IPI00922761	HLA class II histocompatibility antigen, DR alpha chain;MHC class II antigen DRA;cDNA, FLJ93608, Homo sapiens major histocompatibility complex, class II, DR alpha(HLA-DRA), mRNA;Major histocompatibility complex, class II, DR alpha;MHC class II antigen;cDNA FLJ51113, highly similar to HLA class II histocompatibility antigen, DRalpha chain;MRNA coding for histocompatibility antigen HLA-DR.;MHC cell…	HLA-DRA;HLA-DRA1;DADB-70I23.1-001;DAMA-224B5.1-001;DAMC-16P5.1-001;DADB-70I23.1-002;DAMA-224B5.1-002;DAMC-16P5.1-002;DAQB-184K4.1-002;DASS-397D15.1-002;XXbac-BCX213L12.1-002;XXbac-BPG290C9.1-002	HLA class II histocompatibility antigen, DR alpha chain;major histocompatibility complex, class II, DR alpha precursor;cDNA FLJ51113, highly similar to HLA class II histocompatibility antigen, DRalpha chain;Major histocompatibility complex, class II, DR al	P01903;B0UXD8;B4DVL4;Q5SP06;Q29868;Q30118;A1A436;B4DW37;B7Z6Z1;O19670;O19716;O19720;Q59GE3;B4E2U4;B4DLJ8	0	1	0	0	0	2	0	1	1	1	1	1	3.1	28.607	254	0	113180	157450	69131	87979	105560
115	IPI00005180;IPI00954044	HLA class II histocompatibility antigen, DRB1-8 beta chain;MHC class II antigen DRB1*8;MHC class II antigen;MHC Class II antigen;MHC class II antigen HLA-DR-beta 1;Class II antigen HLA-DRB1;MHC class II antigen DR-beta 1;HLA class II;Leukocyte antigen;HLA class II histocompatibility antigen, DRB1-13 beta chain;MHC class II antigen DRB1*13;MHC class II HLA DRB1 protein;MHC class II antigen HLA-DRB…	HLA-DRB1;HLA-DRB;HLA-DR08;HLA-DBR1;HLA-DRB1*0818;HLA-DR;MHC class II HLA DRB1;DRB1;HLA-DRB1*08	HLA class II histocompatibility antigen, DRB1-8 beta chain;MHC ClassII HLA-DR-beta (Fragment)	Q30134;Q4JH26;A0AQY3;A7UMH1;A7XFV9;B2NJ38;B3VTQ5;B6DST0;C4PJL7;C5IZL0;C5NU26;C5NU45;C6L826;C6L828;C8CHC3;O19547;O19804;O78037;O78080;O78184;O78212;P79545;P79546;P79606;Q29685;Q29723;Q29728;Q29769;Q29798;Q5CC31;Q6T862;Q70IU8;Q75NJ5;Q860E6;Q860H8;Q861A4;Q8SNC2;Q95384;Q95HN0;Q9BD02;Q9GJ59;Q9MY29;Q9MY46;Q9TQ51;Q9TQ52;Q9TQ53;Q9TQ54;Q9TQ55;Q9TQ56;Q9TQ57;Q9TQ58	0	1	1	0	1	2	0	0	0	0	0	0	14.7	30.004	266	0	154000	188090	0	171860	224080
116	IPI00893098;IPI00930511;IPI00005186;IPI00943138;IPI00893809;IPI00892984;IPI00941950;IPI00938353;IPI00930379;IPI00935313;IPI00893664	cDNA FLJ59004, highly similar to HLA class II histocompatibility antigen, DQ(1)beta chain;Major histocompatibility complex, class II, DQ beta 1;HLA class II histocompatibility antigen, DQ beta 1 chain;MHC class II HLA-DQ-beta-1;Lymphocyte antigen;HLA-DRB1 protein;MHC class II antigen;cDNA FLJ56572, highly similar to HLA class II histocompatibility antigen, DQ(1)beta chain;cDNA FLJ53582, highly si…	DAMA-367I24.2-002;HLA-DQB1;HLA-DQB;HLA-DQ-beta;HLA-DRB1;DAQB-109B10.2-001;XXbac-BCX254C11.1-001;DQB1-02;DAQB-109B10.2-051;DAMA-367I24.2-004;HLA-DQ;XXbac-BPG254F23.2-001;HLA-DQB1*05	cDNA FLJ59004, highly similar to HLA class II histocompatibility antigen, DQ(1)beta chain;similar to major histocompatibility complex, class II, DR beta 5;similar to major histocompatibility complex, class II, DR beta 5 isoform 2;HLA class II histocompatib	B4E328;B0S7Y6;P01918;O19712;Q30074;Q30096;Q30099;Q30132;Q5Y7D3;Q67AL6;Q67AL7;Q67AL8;B4DHT2;A4USG2;A9YQ98;B4DJG1;O19632;Q29712;Q29755;Q29915;Q29917;Q5SP12;Q6IVL2;Q7YP69;Q9TNR6;B0S7Y8;P01919;P03992;A2VCT9;A6Q0V9;B4DIN3;C0MQ34;O19709;O19764;O78222;Q1HCM3;Q1M312;Q29785;Q29877;Q29999;Q30001;Q30007;Q30079;Q30080;Q30083;Q30084;Q30092;Q30093;Q30097;Q4VC54;Q5BLN0;Q5BLN1;Q5ISH3;Q5Y7B5;Q5Y7D0;Q5Y7D6;Q5Y7F1;…	0	0	0	1	1	0	0	0	0	0	0	0	11	32.012	281	0	23413	27945	102820	0	0
117	IPI00005198	Interleukin enhancer-binding factor 2;Nuclear factor of activated T-cells 45 kDa;cDNA FLJ51660, highly similar to Interleukin enhancer-binding factor 2;Interleukin enhancer binding factor 2 variant	ILF2;NF45;PRO3063	Interleukin enhancer-binding factor 2	Q12905;B4DY09;Q53FG3	0	0	0	0	2	1	0	0	0	0	2	1	5.6	43.062	390	0	0	0	0	221860	33772
118	IPI00005202	Membrane-associated progesterone receptor component 2;Progesterone membrane-binding protein;Steroid receptor protein DG6	DG6;PGRMC2;PMBP	Membrane-associated progesterone receptor component 2	O15173	0	1	0	1	3	1	1	2	2	2	3	3	18.2	26.17	247	175030	222060	202960	851880	258100	46499
119	IPI00005264;IPI00847318;IPI00219688	Plakophilin-2;Plakophilin-2 transcript variant 2b;Truncated plakophilin-2;Plakophilin 2;Plakophilin 2, isoform CRA_d;cDNA FLJ50173, highly similar to Plakophilin-2	PKP2;hCG_1685949	Isoform 2 of Plakophilin-2;plakophilin 2 isoform 2a;Isoform 1 of Plakophilin-2	Q99959-1;Q99959;B8QFA1;B8QGS6;B8QGS7;B8QGS9;A0AV37;B4DR79;Q99959-2	0	0	1	0	0	1	1	2	1	1	0	1	2.4	97.398	881	9373.8	6543.6	99177	16414	0	227470
120	IPI00005490	Coat protein GPP34;Golgi phosphoprotein 3;Mitochondrial DNA absence factor;cDNA FLJ32982 fis, clone THYMU1000002, highly similar to Golgi phosphoprotein 3;cDNA FLJ46665 fis, clone TRACH3007277, highly similar to Golgi phosphoprotein 3;cDNA FLJ90596 fis, clone PLACE1001229, highly similar to Golgi phosphoprotein 3;cDNA FLJ35285 fis, clone PROST2008079, highly similar to Golgi phosphoprotein 3;cDNA…	GOLPH3;GPP34	Golgi phosphoprotein 3	Q9H4A6;B3KQ71;B3KQJ9;B3KS18;B4DDX1;B4DWL6	0	0	0	0	1	0	0	0	1	0	1	0	5	33.81	298	0	0	62150	0	24443	0
121	IPI00005537	39S ribosomal protein L12, mitochondrial;5c5-2;cDNA FLJ60124, highly similar to Mitochondrial dicarboxylate carrier;Mitochondrial ribosomal protein L7/L12	MRPL12;RPML12;MRPL7/L12	cDNA FLJ60124, highly similar to Mitochondrial dicarboxylate carrier	P52815;B4DLN1;Q96Q74	0	0	0	0	2	1	0	1	0	0	2	2	5	48.099	442	0	1233	0	0	286770	8805.2
122	IPI00005563;IPI00910801	Glucocorticoid-inducible protein 5;Oxidized LDL-responsive gene 2 protein;Tubulointerstitial nephritis antigen-like;Tubulointerstitial nephritis antigen-related protein;cDNA FLJ53214, highly similar to Tubulointerstitial nephritis antigen-like;cDNA FLJ55020, highly similar to Tubulointerstitial nephritis antigen-like	GIS5;LCN7;OLRG2;PP6614;PSEC0088;TINAGL;TINAGL1;UNQ204/PRO230	Isoform 1 of Tubulointerstitial nephritis antigen-like;cDNA FLJ55020, highly similar to Tubulointerstitial nephritis antigen-like	Q9GZM7-1;Q9GZM7;B4DVG5;B4DPK6	0	0	0	0	2	0	0	0	0	0	1	1	2.8	52.387	467	0	0	0	0	264150	612.21
123	IPI00005578	EH domain-containing protein 4;Hepatocellular carcinoma-associated protein 10/11;PAST homolog 4;cDNA FLJ77391, highly similar to Homo sapiens EH-domain containing 4 (EHD4), mRNA	EHD4;FKSG7;HCA10;HCA11;PAST4	EH domain-containing protein 4	Q9H223;A8K9B9	0	0	0	0	2	2	0	0	0	0	3	4	9.2	61.174	541	0	0	0	0	619930	3322.2
124	IPI00005613	Splicing factor U2AF 35 kDa subunit;U2 auxiliary factor 35 kDa subunit;U2 snRNP auxiliary factor small subunit;U2 small nuclear RNA auxillary factor 1 isoform a;U2 small nuclear RNA auxiliary factor 1	U2AF1;U2AF35;U2AFBP	Splicing factor U2AF 35 kDa subunit	Q01081;B5BU08;Q7Z780	0	0	0	1	0	0	0	1	1	1	0	0	5.4	27.872	240	0	56259	18669	24232	0	0
125	IPI00005614;IPI00328230;IPI00333015;IPI00012645;IPI00218207;IPI00941774	Beta-II spectrin;Fodrin beta chain;Spectrin beta chain, brain 1;Spectrin, non-erythroid beta chain 1;Spectrin beta non-erythrocytic 1;Spectrin, beta, non-erythrocytic 1, isoform CRA_d;cDNA FLJ55845, highly similar to Spectrin beta chain, brain 1;Spectrin, beta, non-erythrocytic 1, isoform CRA_c;Putative uncharacterized protein SPTBN1;Beta II spectrin-short isoform	SPTB2;SPTBN1;hCG_17370	Isoform Long of Spectrin beta chain, brain 1;Isoform Short of Spectrin beta chain, brain 1;Isoform 2 of Spectrin beta chain, brain 1	Q01082-1;Q01082;B2ZZ89;B4DIF8;Q01082-2;Q53RC4;Q01082-3;B2RP63;Q8WYB3	2	6	8	10	18	23	7	14	12	10	25	28	16.1	274.61	2364	642050	3116800	2640800	1662100	1357800	1590800
126	IPI00005719;IPI00922662;IPI00917079;IPI00334174;IPI00937805;IPI00185217;IPI00374519;IPI00394882;IPI00383449;IPI00909683;IPI00024282;IPI00028481;IPI00556414;IPI00790414;IPI00903040;IPI00789827	Ras-related protein Rab-1A;YPT1-related protein;cDNA, FLJ96558, Homo sapiens RAB1A, member RAS oncogene family (RAB1A), mRNA;RAB1A protein;RAB1A, member RAS oncogene family;RAB1A, member RAS oncogene family, isoform CRA_b;cDNA FLJ57768, highly similar to Ras-related protein Rab-1A;GTP binding protein Rab1a	RAB1;RAB1A;hCG_22592	Isoform 1 of Ras-related protein Rab-1A;cDNA FLJ57768, highly similar to Ras-related protein Rab-1A;19 kDa protein;Isoform 2 of Ras-related protein Rab-1A;23 kDa protein;Isoform 3 of Ras-related protein Rab-1A	P62820-1;P62820;Q5U0I6;B7Z8M7;P62820-2;Q96RD8;P62820-3	0	2	2	2	3	1	1	2	2	2	1	1	24.9	22.677	205	217860	522630	992280	1089200	783980	88603
127	IPI00005721;IPI00021827	Defensin, alpha 1;HNP-1;HNP-2;HP 1-56;Neutrophil defensin 1;Neutrophil defensin 2;Defensin, alpha 1, myeloid-related sequence;Defensin, alpha 1, preproprotein;Novel protein, similar to DEFA1;Defensin, alpha 3;HNP-3;HP 3-56;Neutrophil defensin 3;Defensin, alpha 3, neutrophil-specific	DEF1;DEFA1;DEFA2;MRS;Em:AF200455.10;Em:AF200455.12;Em:AF200455.14;DEF3;DEFA3	Neutrophil defensin 1;Neutrophil defensin 3	P59665;Q6EZF6;P59666;Q6EZE9	2	9	4	2	1	3	2	2	2	2	2	2	19.1	10.201	94	2021000	107750000	74217000	994970	504440	12443000
128	IPI00005728;IPI00154352;IPI00647194;IPI00514229	Protein RER1;cDNA FLJ78405, highly similar to Homo sapiens RER1 retention in endoplasmic reticulum 1 homolog (S. cerevisiae), mRNA;RER1 retention in endoplasmic reticulum 1 homolog (S. cerevisiae);RER1 retention in endoplasmic reticulum 1 homolog (S. cerevisiae), isoform CRA_a;Similar to S. cerevisiae RER1;RER1 protein;RER1 retention in endoplasmic reticulum 1 homolog (S. cerevisiae), isoform CRA…	RER1;hCG_24604;RP4-740C4.2-001;RP4-740C4.2-002;RP4-740C4.2-006;RP4-740C4.2-004	RER1 protein;RER1 retention in endoplasmic reticulum 1 homolog (S. cerevisiae), isoform CRA_b;RER1 retention in endoplasmic reticulum 1 homolog;RER1 retention in endoplasmic reticulum 1 homolog	O15258;Q5T094;Q6IBJ7;Q9P0H9;Q5T091;Q5T092;Q5T093	0	1	0	1	0	0	0	1	0	1	0	0	6.1	24.817	214	0	64998	0	160380	0	0
129	IPI00005778	Eosinophil major basic protein homolog;Prepro-major basic protein homolog;Proteoglycan 3	MBPH;PRG3;UNQ486/PRO1002	Proteoglycan 3	Q9Y2Y8	1	3	0	1	0	0	1	1	1	1	1	1	4.9	25.446	225	705460	409080	238880	228710	12946	16056
130	IPI00005792;IPI00414963	Nuclear poly(A)-binding protein 1;Poly(A)-binding protein II;Polyadenylate-binding nuclear protein 1;Polyadenylate-binding protein 2;cDNA FLJ57714, highly similar to Poly(A)-binding protein 2	PAB2;PABP2;PABPN1	Isoform 1 of Polyadenylate-binding protein 2;Isoform 2 of Polyadenylate-binding protein 2	Q86U42-1;Q86U42;Q86U42-2;B4DEH8	0	2	1	1	1	0	2	2	2	1	1	1	7.8	32.749	306	279000	483030	1342300	649060	77698	36153
131	IPI00005809	Cavin-2;Phosphatidylserine-binding protein;PS-p68;Serum deprivation-response protein;cDNA FLJ78516	SDPR	Serum deprivation-response protein	O95810;A8K2W3	1	0	0	1	2	2	1	1	0	1	3	2	12	47.173	425	398660	30007	0	146190	57513	230760
132	IPI00005966	13 kDa differentiation-associated protein;Complex I-B17.2;NADH dehydrogenase [ubiquinone] 1 alpha subcomplex subunit 12;NADH-ubiquinone oxidoreductase subunit B17.2;13kDa differentiation-associated protein variant	DAP13;NDUFA12	13kDa differentiation-associated protein variant (Fragment)	Q9UI09;Q53HG1	0	0	0	0	1	0	0	0	0	0	1	0	5.5	17.214	146	0	0	0	0	48835	0
133	IPI00005969;IPI00873484	CapZ alpha-1;F-actin-capping protein subunit alpha-1;cDNA FLJ75422, highly similar to Homo sapiens capping protein (actin filament) muscle Z-line, alpha 1, mRNA	CAPZA1	F-actin-capping protein subunit alpha-1;Putative uncharacterized protein CAPZA1 (Fragment)	P52907;A8K0T9;A8MV55	1	2	0	1	0	0	1	2	1	1	0	0	14.3	32.922	286	168970	65583	80448	195310	0	0
134	IPI00005978;IPI00796848;IPI00385786;IPI00746575;IPI00902967;IPI00477842;IPI00856075;IPI00894320	Protein PR264;Splicing component, 35 kDa;Splicing factor SC35;Splicing factor, arginine/serine-rich 2;cDNA FLJ40890 fis, clone UTERU2001024, highly similar to SPLICING FACTOR, ARGININE/SERINE-RICH 2;Splicing factor, arginine/serine-rich 2, isoform CRA_d;Splicing factor, arginine/serine-rich 2 variant;cDNA FLJ52570, highly similar to Splicing factor, arginine/serine-rich 2;Splicing factor, arginin…	SFRS2;hCG_27842	Splicing factor, arginine/serine-rich 2;cDNA FLJ52570, highly similar to Splicing factor, arginine/serine-rich 2;cDNA FLJ35170 fis, clone PLACE6012942, highly similar to SPLICING FACTOR, ARGININE/SERINE-RICH 2;cDNA FLJ39750 fis, clone SMINT2017736, moderat	Q01130;B3KUY1;B3KWD5;Q53FN0;B4DN89;B3KVY2;Q8NAK9;B3KUF7;Q6NXQ0;Q8N220;B3KX15	0	0	0	0	3	1	0	2	2	0	3	2	18.6	25.476	221	0	200060	290590	0	211910	430260
135	IPI00006079;IPI00413671;IPI00413672;IPI00413673;IPI00886854;IPI00886987	Bcl-2-associated transcription factor 1;BCLAF1 protein;cDNA, FLJ79533, highly similar to Bcl-2-associated transcription factor 1	BCLAF1;BTF;KIAA0164	Isoform 1 of Bcl-2-associated transcription factor 1;Isoform 2 of Bcl-2-associated transcription factor 1;Isoform 3 of Bcl-2-associated transcription factor 1;Isoform 4 of Bcl-2-associated transcription factor 1;similar to BCL2-associated transcription fac	Q9NYF8-1;Q9NYF8;Q6DCA8;Q9NYF8-2;Q9NYF8-3;Q9NYF8-4;B0AZU3	0	0	2	1	0	0	0	1	2	2	1	2	2	106.12	920	0	5695.1	81253	63393	2645.2	2030.4
136	IPI00006091;IPI00304639;IPI00375141;IPI00472316;IPI00304638;IPI00220577;IPI00334618;IPI00335579;IPI00376366;IPI00184337;IPI00376375;IPI00872706	Dystrophin;DMD protein;Duchenne muscular dystrophy gene;Duchenne muscular dystrophy protein	DMD;GS1-19O24.1-002;GS1-19O24.1-006;GS1-19O24.1-004	Isoform 4 of Dystrophin;dystrophin Dp427c isoform;dystrophin Dp427l isoform;dystrophin Dp427p1 isoform;Isoform 1 of Dystrophin;Isoform 2 of Dystrophin;dystrophin Dp140b isoform;dystrophin Dp140ab isoform;dystrophin Dp140 isoform;dystrophin Dp140bc isoform;	P11532-1;P11532;P11532-4;Q4G0X0;Q6PK12;Q8WYE2;Q8WYD8;Q8WYD9;Q8WYE0;Q8WYE1;Q9UEH4;Q9UPB4;B1AK23;Q548X2;Q7KZ40;Q8WYE3;Q8WYE4;Q8WYE5;Q8WYE6;Q8WYE7;Q8WYE8;Q8WYE9;Q8WYF0;Q8WYF1;Q8WYF2;Q8WYF5;Q9UMG1;Q9UPB5;P11532-2;P11532-3;Q14172;Q8WYC7;Q8WYC8;Q8WYC9;Q8WYD0;Q8WYD2;Q8WYD3;Q8WYD4;Q8WYD5;Q8WYD6;Q8WYD7;Q9UME2;Q9UMK8;A7E212;A1L0U9;Q8WYC0;Q8WYC1;Q8WYC2;Q8WYC3;Q9UMK6	0	0	0	0	1	1	0	0	0	0	1	1	0.7	426.69	3685	0	0	0	0	15235	0
137	IPI00006092	Phosphomannomutase 2;cDNA, FLJ92901, highly similar to Homo sapiens phosphomannomutase 2 (PMM2), mRNA;cDNA FLJ59907, highly similar to Phosphomannomutase 2 (EC 5.4.2.8);cDNA FLJ50559, highly similar to Phosphomannomutase 2 (EC 5.4.2.8);cDNA FLJ52163, highly similar to Phosphomannomutase 2 (EC 5.4.2.8);cDNA FLJ50693, highly similar to Phosphomannomutase 2 (EC 5.4.2.8);Phosphomannomutase 2, isoform…	PMM2;hCG_15401	Phosphomannomutase 2	O15305;B2R6D4;B7Z3M6;B7Z419;B7Z6A1;B7Z6R0;B7Z922;Q59F02	0	2	0	0	0	1	0	2	1	1	1	1	10.2	28.082	246	0	173510	44888	66621	36572	26814
138	IPI00006114;IPI00796279;CON__Q95121	Cell proliferation-inducing gene 35 protein;EPC-1;Pigment epithelium-derived factor;Serpin F1	PEDF;PIG35;SERPINF1	Pigment epithelium-derived factor;25 kDa protein	P36955;Q2TU83	0	1	0	0	0	2	0	1	0	0	2	4	8.9	46.342	418	0	105050	0	0	96024	512190
139	IPI00006167;IPI00746326	Protein phosphatase 1C;Protein phosphatase 1G;Protein phosphatase 2C isoform gamma;Protein phosphatase magnesium-dependent 1 gamma;cDNA, FLJ92810, highly similar to Homo sapiens protein phosphatase 1G (formerly 2C), magnesium-dependent, gamma isoform (PPM1G), mRNA;cDNA FLJ45688 fis, clone FCBBF3021191, highly similar to Protein phosphatase 2C isoform gamma (EC 3.1.3.16);cDNA FLJ57252, highly simi…	PPM1C;PPM1G;hCG_21229	Protein phosphatase 1G;Protein phosphatase 1G variant (Fragment)	O15355;B2R665;B3KXL8;B4DDC8;Q6IAU5;Q96IN7;Q59GB2	0	0	0	1	0	0	0	1	1	1	0	0	2	59.271	546	0	39451	17056	5277	0	0
140	IPI00872028;IPI00292771;IPI00006196	NUMA1 variant protein;Nuclear mitotic apparatus protein 1;SP-H antigen;cDNA FLJ76708, highly similar to Homo sapiens nuclear mitotic apparatus protein 1 (NUMA1), mRNA;NUMA1 protein;Nuclear mitotic apparatus protein 1 variant;Putative uncharacterized protein;Nuclear mitotic apparatus protein	NUMA1 variant protein;NUMA;NUMA1;NuMA	NUMA1 variant protein (Fragment);Isoform 1 of Nuclear mitotic apparatus protein 1;Isoform 2 of Nuclear mitotic apparatus protein 1	Q4LE64;Q14980-1;Q14980;Q14980-2;A8K394;Q3SYK8;Q59HB8;Q7Z757;Q96HN5;Q9UPG3	0	1	1	0	1	2	0	3	3	1	2	3	2.7	238.86	2121	0	32819	47023	89809	216080	37554
141	IPI00006379;IPI00924866	Nucleolar protein 5;Nucleolar protein 58;cDNA FLJ13913 fis, clone Y79AA1000231, highly similar to Nucleolar protein NOP5;cDNA FLJ56668, highly similar to Nucleolar protein NOP5	HSPC120;NOL5;NOP5;NOP58	Nucleolar protein 58;Putative uncharacterized protein NOP58	Q9Y2X3;B3KN82;B4DUY3;C9JWP8	0	0	0	0	1	0	0	0	0	0	1	1	2.6	59.578	529	0	0	0	0	50690	38.939
142	IPI00376756;IPI00888596;IPI00787656;IPI00374293;IPI00217477;IPI00941696;IPI00640781;IPI00643317;IPI00936241;IPI00411540;IPI00006437	High mobility group protein 2a;High mobility group protein 4;High mobility group protein B3;Non-histone chromosomal protein;High mobility group protein 4-like;Putative high mobility group protein B3-like-1	HMG2A;HMG4;HMGB3;HMG4L;HMGB3L1	similar to high mobility group box 3;similar to high mobility group box 3;similar to high mobility group box 3;similar to high mobility group box 3 isoform 1;High mobility group protein B3;Putative uncharacterized protein ENSP00000410962 (Fragment);22 kDa	O15347;C9J8V8;Q16466;Q3SYE8	0	1	1	0	0	0	0	1	1	1	0	0	6.2	23.744	208	0	171560	1181400	181810	0	0
143	IPI00006451;IPI00936987;IPI00787942;IPI00938290;IPI00748065	N-ethylmaleimide-sensitive fusion protein;Vesicle-fusing ATPase;Vesicular-fusion protein NSF;cDNA FLJ59316, highly similar to Vesicle-fusing ATPase (EC 3.6.4.6);cDNA FLJ54349, highly similar to Vesicle-fusing ATPase (EC 3.6.4.6);cDNA FLJ54615, highly similar to Vesicle-fusing ATPase (EC 3.6.4.6);cDNA FLJ54381, highly similar to Vesicle-fusing ATPase (EC 3.6.4.6);cDNA FLJ58682, highly similar to V…	NSF	Vesicle-fusing ATPase;cDNA FLJ58682, highly similar to Vesicle-fusing ATPase;similar to N-ethylmaleimide-sensitive factor;similar to N-ethylmaleimide-sensitive factor	P46459;B4DFA2;B4DGR3;B4DH19;B4DSK5;B7Z5J7;B7Z9U2;Q96D47;Q9H3V6;C9JF89	0	2	0	0	2	2	0	4	0	0	2	2	10.1	82.593	744	0	74214	0	0	144890	0
144	IPI00646182;IPI00006482;IPI00414005;IPI00788782;IPI00302840;IPI00003021;IPI00640401;IPI00908591;IPI00647102;IPI00911028;IPI00218919;IPI00375339;IPI00008161;IPI00872242;IPI00909069;IPI00930085;IPI00744194;IPI00644722	cDNA FLJ55427, highly similar to Sodium/potassium-transporting ATPase alpha-1 chain (EC 3.6.3.9);cDNA FLJ60077, highly similar to Sodium/potassium-transporting ATPase alpha-1 chain (EC 3.6.3.9);Sodium pump subunit alpha-1;Sodium/potassium-transporting ATPase subunit alpha-1;cDNA FLJ53830, highly similar to Sodium/potassium-transporting ATPase alpha-1 chain (EC 3.6.3.9);ATPase, Na+/K+ transporting…	ATP1A1;hCG_37943;RP4-655J12.1-002	Na+/K+ -ATPase alpha 1 subunit isoform c;Isoform Long of Sodium/potassium-transporting ATPase subunit alpha-1;Isoform Short of Sodium/potassium-transporting ATPase subunit alpha-1	B7Z2T5;B7Z3V1;P05023-1;P05023;P05023-2;B7Z1N5;B7Z3U6;Q5TC01	0	6	1	3	11	9	1	9	4	4	12	13	18.7	113	1023	150170	1255300	1151600	571030	1358000	674060
145	IPI00006579;IPI00645361	Cytochrome c oxidase polypeptide IV;Cytochrome c oxidase subunit 4 isoform 1, mitochondrial;Cytochrome c oxidase subunit IV isoform 1;COX4I1 protein	COX4;COX4I1	Cytochrome c oxidase subunit 4 isoform 1, mitochondrial;COX4I1 protein	P13073;Q6P666;Q86WV2	0	2	1	1	5	2	1	2	2	1	4	2	24.3	19.576	169	130550	80415	1168500	63970	2277500	1026200
146	IPI00006620;IPI00910077;IPI00877723	Monocarboxylate transporter 6;Monocarboxylate transporter 7;Solute carrier family 16 member 6;SLC16A6 protein;cDNA FLJ76016, highly similar to Homo sapiens solute carrier family 16 (monocarboxylic acid transporters), member 6 (SLC16A6), mRNA;Putative uncharacterized protein SLC16A6	MCT6;MCT7;SLC16A6	Monocarboxylate transporter 7;Monocarboxylate transporter 7;16 kDa protein	O15403;A1L174;A1L175;A8K302;B7WPH2	0	0	0	0	0	0	0	1	0	1	0	0	1.3	57.393	523	0	0	0	0	0	0
147	IPI00924574;IPI00006662;IPI00927914;IPI00910432;IPI00927707	Putative uncharacterized protein APOD;Apolipoprotein D	APOD	Putative uncharacterized protein APOD;Apolipoprotein D	C9JF17;P05090	0	4	0	1	2	4	2	4	2	3	3	4	26	24.158	215	410190	586520	208130	424680	396550	426460
148	IPI00006663;IPI00792207	Aldehyde dehydrogenase, mitochondrial;ALDH class 2;ALDH-E2;ALDHI;Mitochondrial aldehyde dehydrogenase 2 variant;ALDH2;cDNA FLJ50888, highly similar to Aldehyde dehydrogenase, mitochondrial (EC 1.2.1.3);Mitochondrial aldehyde dehydrogenase 2	ALDH2;ALDM	Aldehyde dehydrogenase, mitochondrial;cDNA FLJ50888, highly similar to Aldehyde dehydrogenase, mitochondrial	P05091;Q53FB6;B0LUF9;B0LUG0;B0LUG2;B4DW54;B4YAH7;Q9UN17	1	4	4	1	8	5	2	3	5	4	7	5	17.6	56.381	517	1074900	576510	2153000	898870	688470	401190
149	IPI00006690	Eosinophil peroxidase;Eosinophil peroxidase heavy chain;Eosinophil peroxidase light chain	EPER;EPO;EPP;EPX	Eosinophil peroxidase	P11678	3	2	2	2	3	3	3	4	5	5	4	4	12.2	81.04	715	2389400	665010	1787000	992410	172800	134600
150	IPI00107753;IPI00107752;IPI00107751;IPI00107750;IPI00107749;IPI00006721;IPI00375150;IPI00375149	Dynamin-like 120 kDa protein, form S1;Dynamin-like 120 kDa protein, mitochondrial;Optic atrophy protein 1;OPA1 protein	KIAA0567;OPA1	optic atrophy 1 isoform 8;Isoform 2 of Dynamin-like 120 kDa protein, mitochondrial;optic atrophy 1 isoform 6;optic atrophy 1 isoform 5;optic atrophy 1 isoform 4;Isoform 1 of Dynamin-like 120 kDa protein, mitochondrial;optic atrophy 1 isoform 3;optic atroph	O60313-2;O60313;O60313-1;Q6PEK6	0	0	0	1	1	1	1	1	1	1	1	1	2.2	117.74	1015	5564.2	6499.4	5744.1	91139	0	0
151	IPI00006865	ER-Golgi SNARE of 24 kDa;SEC22 vesicle-trafficking protein homolog B;SEC22 vesicle-trafficking protein-like 1;Vesicle-trafficking protein SEC22b	SEC22B;SEC22L1	Vesicle-trafficking protein SEC22b	O75396	0	1	1	1	2	2	1	3	2	3	3	3	28.8	24.74	215	157000	562470	192250	94913	140770	229700
152	IPI00006932;IPI00216804;IPI00071318;IPI00410027;IPI00410026;IPI00853373;IPI00793246;IPI00798019;IPI00893219;IPI00893216;IPI00927709	Putative RNA-binding protein Luc7-like 2;cDNA FLJ36545 fis, clone TRACH2006670, highly similar to RNA-binding protein Luc7-like 2;cDNA FLJ55988, highly similar to RNA-binding protein Luc7-like 2;cDNA FLJ55994, highly similar to RNA-binding protein Luc7-like 2;cDNA FLJ34725 fis, clone MESAN2005958, highly similar to RNA-binding protein Luc7-like 2;cDNA FLJ36762 fis, clone UTERU2018955, highly simi…	CGI-59;CGI-74;LUC7L2;LUC7L;LUC7L1;hCG_22425;LA16c-OS12.1-001;LA16c-OS12.1-007;LA16c-OS12.1-015;LA16c-OS12.1-020	cDNA FLJ55988, highly similar to RNA-binding protein Luc7-like 2;Isoform 2 of Putative RNA-binding protein Luc7-like 2;Isoform 1 of Putative RNA-binding protein Luc7-like 1;Isoform 3 of Putative RNA-binding protein Luc7-like 1;Isoform 2 of Putative RNA-bin	Q9Y383-1;Q9Y383;B3KSL5;B7Z4Q3;B7Z500;Q9Y383-2;B3KRR1;B3KSP8;Q9NQ29-1;Q9NQ29;Q53G47;Q9NQ29-3;Q9NQ29-2;Q1W6G4;A8MYV2;B8ZZ10;C9JWT3;B8ZZ12	0	1	2	1	0	0	2	1	2	2	0	1	4.4	54.223	458	21456	216940	153820	176500	0	16843
153	IPI00007001;IPI00377233;IPI00333848	39S ribosomal protein L11, mitochondrial;Mitochondrial ribosomal protein L11 isoform a variant;Mitochondrial ribosomal protein L11;Mitochondrial ribosomal protein L11, isoform CRA_f;Mitochondrial ribosomal protein L11, isoform CRA_c;Putative uncharacterized protein MRPL11	CGI-113;MRPL11;hCG_2017204	39S ribosomal protein L11, mitochondrial;mitochondrial ribosomal protein L11 isoform b;mitochondrial ribosomal protein L11 isoform c	Q9Y3B7;Q53G19;Q32P46;A6NLT0	0	0	0	1	1	0	0	1	0	1	1	0	15.6	20.683	192	0	25785	0	22685	0	0
154	IPI00007047	Calgranulin-A;Calprotectin L1L subunit;Cystic fibrosis antigen;Leukocyte L1 complex light chain;Migration inhibitory factor-related protein 8;Protein S100-A8;S100 calcium-binding protein A8;Urinary stone protein band A	CAGA;CFAG;MRP8;S100A8	Protein S100-A8	P05109	0	1	1	0	2	3	1	2	1	1	2	2	19.4	10.834	93	24522	131560	725360	5243.1	447120	3144900
155	IPI00007052	FIS1 homolog;Mitochondrial fission 1 protein;Tetratricopeptide repeat protein 11	CGI-135;FIS1;TTC11	Mitochondrial fission 1 protein	Q9Y3D6	0	0	1	0	0	0	0	1	1	1	0	0	8.6	16.937	152	0	3908.7	312170	9990.1	0	0
156	IPI00007058;IPI00908316;IPI00867659	Coronin-1B;Coronin-2;Putative uncharacterized protein DKFZp762I166;cDNA FLJ60046, highly similar to Coronin-1B;Coronin, actin binding protein, 1B variant	CORO1B;DKFZp762I166	Coronin-1B;cDNA FLJ60046, highly similar to Coronin-1B;Coronin-1B	Q9BR76;Q9NSK3;B4DIU2;Q59F81	0	0	0	0	1	0	0	0	0	0	2	0	4.7	54.234	489	0	0	0	0	20552	0
157	IPI00872817;IPI00007067;IPI00874202;IPI00909760;IPI00479010	Putative uncharacterized protein GLIPR2;Glioma pathogenesis-related protein 2;Golgi-associated plant pathogenesis-related protein 1;cDNA FLJ58039, highly similar to Golgi-associated plant pathogenesis-related protein 1;GLI pathogenesis-related 2	GLIPR2;C9orf19;GAPR1;RP11-421H8.5-004	Putative uncharacterized protein GLIPR2;Golgi-associated plant pathogenesis-related protein 1;Putative uncharacterized protein GLIPR2 (Fragment);cDNA FLJ58039, highly similar to Golgi-associated plant pathogenesis-related protein 1;Putative uncharacterized	A8MWQ4;Q9H4G4;A8MZ81;B4DQC5;A6NKU3;Q5VZR0	1	2	1	0	2	2	2	2	1	0	3	3	27.9	17.287	154	698440	5728	67315	0	80665	79030
158	IPI00007074	Tyrosyl--tRNA ligase;Tyrosyl-tRNA synthetase, cytoplasmic	YARS	Tyrosyl-tRNA synthetase, cytoplasmic	P54577	0	0	0	0	0	1	0	0	1	0	0	1	4.2	59.143	528	0	0	0	0	0	58267
159	IPI00007102;IPI00745272;IPI00032575;IPI00922891;IPI00909336;IPI00792035	cDNA FLJ76436;Uncharacterized protein C17orf25.;Glyoxalase domain-containing protein 4;cDNA FLJ16128 fis, clone BRACE2038269, moderately similar to Bombyx mori cytosolic juvenile hormone binding protein 36 kDa subunit (cJHBP) mRNA;cDNA FLJ55095;cDNA FLJ59092	C17orf25;CGI-150;GLOD4;My027	Uncharacterized protein C17orf25;Isoform 2 of Glyoxalase domain-containing protein 4;Isoform 1 of Glyoxalase domain-containing protein 4;cDNA FLJ55095;cDNA FLJ59092;Isoform 3 of Glyoxalase domain-containing protein 4	A8K8F0;Q9Y3E8;Q9HC38-2;Q9HC38;B3KV49;Q9HC38-1;B7Z403;B4DX01;Q9HC38-3	0	0	2	0	4	2	0	2	2	2	4	4	9.9	55.011	504	0	120780	313790	64248	166700	30446
160	IPI00433834;IPI00027270;IPI00007144;IPI00939745;IPI00789514	Putative uncharacterized protein RPL26;60S ribosomal protein L26;RPL26 protein;60S ribosomal protein L26-like 1	RPL26;RPL26L1;RPL26P1	Putative uncharacterized protein RPL26;60S ribosomal protein L26;60S ribosomal protein L26-like 1;17 kDa protein;13 kDa protein	A6NE05;P61254;Q6IBH6;Q9UNX3	1	0	2	1	1	0	1	2	2	1	1	2	5.9	18.254	153	35713	337800	124880	315170	213540	39474
161	IPI00007188;IPI00455148;IPI00010420	Adenine nucleotide translocator 2;ADP,ATP carrier protein 2;ADP,ATP carrier protein, fibroblast isoform;ADP/ATP translocase 2;Solute carrier family 25 member 5;cDNA, FLJ96310, highly similar to Homo sapiens solute carrier family 25 (mitochondrial carrier; adenine nucleotide translocator), member 5 (SLC25A5), mRNA;SLC25A5 protein	ANT2;SLC25A5	ADP/ATP translocase 2	P05141;B2RCV1;Q6NVC0	0	1	1	2	4	5	1	1	1	1	1	2	20.8	32.895	298	628040	360720	764080	862920	3166300	254740
162	IPI00236556;IPI00007244;IPI00236554;IPI00877025	84 kDa myeloperoxidase;89 kDa myeloperoxidase;Myeloperoxidase;Myeloperoxidase heavy chain;Myeloperoxidase light chain	MPO	Isoform H7 of Myeloperoxidase;Isoform H17 of Myeloperoxidase;Isoform H14 of Myeloperoxidase;Putative uncharacterized protein MPO (Fragment)	P05164-3;P05164;P05164-1;P05164-2;A8MUK8	3	12	8	1	0	5	3	8	8	3	1	5	12.4	87.248	777	837510	8836500	4798000	36893	3393.7	591100
163	IPI00640747;IPI00007309;IPI00908999;IPI00787101;IPI00514314;IPI00910212;IPI00942613;IPI00645653	Putative mitochondrial import inner membrane translocase subunit Tim23B;Mitochondrial import inner membrane translocase subunit Tim23;cDNA FLJ56773, highly similar to Mitochondrial import inner membrane translocase subunit Tim23;cDNA, FLJ79448, highly similar to Mitochondrial import inner membrane translocase subunit Tim23;cDNA, FLJ79389, highly similar to Mitochondrial import inner membrane tran…	TIMM23B;TIM23;TIMM23;RP11-481A12.7-002	Putative mitochondrial import inner membrane translocase subunit Tim23B;Mitochondrial import inner membrane translocase subunit Tim23;cDNA, FLJ79448, highly similar to Mitochondrial import inner membrane translocase subunit Tim23;20 kDa protein;cDNA FLJ574	Q5SRD1;O14925;B4DI18;B7ZB25;B1APJ0;B4DDK6	0	0	0	0	1	0	0	0	0	0	1	0	6.6	28.048	257	0	0	0	0	17778	0
164	IPI00007321;IPI00939508;IPI00398727;IPI00909991	cDNA FLJ60607, highly similar to Acyl-protein thioesterase 1 (EC 3.1.2.-);Acyl-protein thioesterase 1;Lysophospholipase 1;Lysophospholipase I;cDNA FLJ78542, highly similar to Homo sapiens lysophospholipase I (LYPLA1), mRNA;cDNA, FLJ94339, Homo sapiens lysophospholipase I (LYPLA1), mRNA;LYPLA1 protein;Lysophospholipase I, isoform CRA_a;cDNA FLJ52008, highly similar to Acyl-protein thioesterase 1 (…	APT1;LPL1;LYPLA1;hCG_1983522	cDNA FLJ60607, highly similar to Acyl-protein thioesterase 1;Isoform 1 of Acyl-protein thioesterase 1;Isoform 2 of Acyl-protein thioesterase 1;cDNA FLJ52008, highly similar to Acyl-protein thioesterase 1	B4DJV9;O75608-1;O75608;Q6IAQ1;O75608-2;B4DP64	0	1	0	0	0	2	0	1	1	1	2	2	8	28.279	263	0	409080	137890	1030500	50119	36841
165	IPI00645962;IPI00792503;IPI00791568;IPI00794567;IPI00871921;IPI00007327;IPI00746286;IPI00953606;IPI00217384;IPI00954021;IPI00942301;IPI00922555;IPI00874287;IPI00871746;IPI00944980;IPI00439936	NGS-17;Tapasin;TAP-associated protein;TAP-binding protein;TAP binding protein (Tapasin);Putative uncharacterized protein ENSP00000393234;Putative uncharacterized protein ENSP00000404967;Putative uncharacterized protein TAPBP;cDNA FLJ60731, highly similar to Tapasin;Putative uncharacterized protein ENSP00000417523;TAPBP protein	NGS17;TAPA;TAPBP;DAMC-227D19.13-007;XXbac-BPG185D15.1-007;DADB-159G18.7-007;DAQB-126H3.1-007;XXbac-BCX165D10.5-007;DAMC-227D19.13-006;XXbac-BPG185D15.1-006	Isoform 3 of Tapasin;tapasin isoform 2 precursor;TAP binding protein;TAP binding protein;Putative uncharacterized protein TAPBP;Isoform 1 of Tapasin;tapasin isoform 1 precursor;48 kDa protein;Isoform 2 of Tapasin;44 kDa protein;tapasin isoform 3 precursor;	O15533-3;O15533;A2AB90;A2ABB9;A8MUD0;O15533-1;O15533-2;A2AB92;B7Z4V3;A8MUH0;C9JA35;Q6P1N7	0	0	0	0	2	2	0	0	0	0	2	2	4.6	53.943	504	0	0	0	0	129480	116270
166	IPI00007334;IPI00946415;IPI00911038	Apoptotic chromatin condensation inducer in the nucleus;ACIN1 protein;cDNA FLJ50838, highly similar to Apoptotic chromatin condensation inducer in thenucleus;Putative uncharacterized protein DKFZp667N107	ACIN1;ACINUS;KIAA0670;DKFZp667N107	Isoform 1 of Apoptotic chromatin condensation inducer in the nucleus;apoptotic chromatin condensation inducer 1 isoform 2;apoptotic chromatin condensation inducer 1 isoform 3	Q9UKV3-1;Q9UKV3;B2RTT4;B4DQZ7;Q69YJ6	0	0	0	1	0	0	0	1	0	1	0	0	0.7	151.89	1341	0	14898	0	26394	0	0
167	IPI00007364	Claudin-3;Clostridium perfringens enterotoxin receptor 2;Rat ventral prostate.1 protein homolog;cDNA, FLJ93788, Homo sapiens claudin 3 (CLDN3), mRNA;Claudin 3;Putative uncharacterized protein CLDN3	C7orf1;CLDN3;CPETR2;hCG_1737329	Claudin-3	O15551;Q75L79	0	0	0	0	2	1	0	0	0	0	1	1	5.5	23.318	220	0	0	0	0	190990	21899
168	IPI00007402	Importin-7;Ran-binding protein 7;cDNA FLJ14581 fis, clone NT2RM4001382, highly similar to Importin-7;cDNA FLJ14986 fis, clone Y79AA1000784, highly similar to Importin-7;cDNA FLJ90427 fis, clone NT2RP3000481, highly similar to Importin-7	IPO7;RANBP7	Importin-7	O95373;B3KNG9;B3KQG6	0	1	0	1	0	0	0	1	1	1	0	0	1.3	119.52	1038	0	48758	32938	86119	0	0
169	IPI00007404;IPI00479911;IPI00925029;IPI00909500	APG7-like;Autophagy-related protein 7;Ubiquitin-activating enzyme E1-like protein;cDNA, FLJ95321, highly similar to Homo sapiens ATG7 autophagy related 7 homolog (S. cerevisiae) (ATG7), mRNA;cDNA FLJ90740 fis, clone PLACE1011045, highly similar to Autophagy-related protein 7;cDNA FLJ53475, highly similar to Autophagy-related protein 7;Putative uncharacterized protein ATG7;cDNA FLJ53485, highly si…	APG7L;ATG7	Isoform 1 of Autophagy-related protein 7;Isoform 2 of Autophagy-related protein 7;Putative uncharacterized protein ATG7;APG7 autophagy 7-like isoform c	O95352-1;O95352;B2RB57;B3KQM6;B4DQK1;O95352-2;C9JTK7;C9JVT9;B4E170	0	0	0	0	0	1	0	0	0	0	1	1	1.4	77.959	703	0	0	0	0	16344	11176
170	IPI00007427;IPI00893607;IPI00942032;IPI00952571;IPI00893733;IPI00910250	cDNA, FLJ93394, highly similar to Homo sapiens anterior gradient 2 homolog (Xenopus laevis) (AGR2), mRNA;AGR2;Anterior gradient 2 homolog;Putative uncharacterized protein AGR2;Anterior gradient protein 2 homolog;HPC8;Secreted cement gland protein XAG-2 homolog;Anterior gradient 2 homolog (Xenopus laevis);Anterior gradient 2 homolog (Xenopus laevis), isoform CRA_a	AGR2;AG2;UNQ515/PRO1030;hCG_19292;tcag7.197	AGR2;Putative uncharacterized protein AGR2;Anterior gradient protein 2 homolog;Putative uncharacterized protein AGR2;Putative uncharacterized protein AGR2	B2R7D7;Q4JM47;Q53G64;B5MC07;O95994;Q4JM46;C9J3E2;C9JQD7	0	0	0	0	2	0	0	0	0	1	2	1	14.9	22.237	195	0	0	0	2227.3	768960	15502
171	IPI00007611;IPI00853134;IPI00789135	ATP synthase subunit O, mitochondrial;Oligomycin sensitivity conferral protein;ATP synthase	ATP5O;ATPO	ATP synthase subunit O, mitochondrial;Putative uncharacterized protein ATP5O	P48047;Q53HH2;C9JWR2	0	0	0	0	5	2	0	0	0	0	4	2	25.8	23.277	213	0	0	0	0	1459300	18967
172	IPI00007676	17-beta-hydroxysteroid dehydrogenase 12;3-ketoacyl-CoA reductase;Estradiol 17-beta-dehydrogenase 12;cDNA FLJ90530 fis, clone NT2RP4002187, highly similar to Homo sapiens hydroxysteroid (17-beta) dehydrogenase 12 (HSD17B12), mRNA;cDNA FLJ61181, highly similar to Homo sapiens hydroxysteroid (17-beta) dehydrogenase 12 (HSD17B12), mRNA	HSD17B12	Estradiol 17-beta-dehydrogenase 12	Q53GQ0;B3KQJ0;B4DWS6	0	1	0	1	2	1	0	1	1	1	4	1	11.9	34.324	312	0	613450	5001.7	406330	27387	37415
173	IPI00007682;IPI00946476;IPI00946636	Vacuolar ATPase isoform VA68;Vacuolar proton pump subunit alpha;V-ATPase 69 kDa subunit;V-type proton ATPase catalytic subunit A;cDNA FLJ51804, highly similar to Vacuolar ATP synthase catalytic subunit A, ubiquitous isoform (EC 3.6.3.14);cDNA FLJ53889, highly similar to Vacuolar ATP synthase catalytic subunit A, ubiquitous isoform (EC 3.6.3.14)	ATP6A1;ATP6V1A;ATP6V1A1;VPP2	V-type proton ATPase catalytic subunit A	P38606;B7Z1R5;B7Z2V6	0	1	1	1	2	1	1	1	1	1	4	2	10.2	68.303	617	0	0	418800	0	34263	46575
174	IPI00007702;IPI00902596	Heat shock-related 70 kDa protein 2;cDNA FLJ40505 fis, clone TESTI2045562, highly similar to HEAT SHOCK-RELATED 70 kDa PROTEIN 2	HSPA2	Heat shock-related 70 kDa protein 2;cDNA FLJ40505 fis, clone TESTI2045562, highly similar to HEAT SHOCK-RELATED 70 kDa PROTEIN 2	P54652;B3KUS2	0	0	0	0	2	3	0	0	1	1	3	3	17.1	70.02	639	0	0	6138.6	10807	181170	355330
175	IPI00007750;IPI00794663;IPI00335314;IPI00794009;IPI00916823;IPI00797717	Alpha-tubulin 1;Testis-specific alpha-tubulin;Tubulin alpha-1 chain;Tubulin alpha-4A chain;Tubulin H2-alpha;cDNA FLJ58687, highly similar to Tubulin alpha-4 chain;Putative uncharacterized protein TUBA4A;Tubulin, alpha 1 (Testis specific), isoform CRA_a	TUBA1;TUBA4A;hCG_2013418	Tubulin alpha-4A chain;Tubulin, alpha 1 (Testis specific), isoform CRA_a;Putative uncharacterized protein TUBA4A	P68366;A8MUB1;A6NHY4	0	1	1	0	2	2	0	1	1	1	2	2	16.5	49.924	448	0	162320	309810	7778.8	305770	182680
176	IPI00007752;IPI00930130;IPI00023598;IPI00647896;IPI00926685;IPI00292496;IPI00152453;IPI00013683;IPI00174849;IPI00942474;IPI00514047;IPI00945532;IPI00640115;IPI00644620;IPI00939129;IPI00018511;IPI00909781;IPI00877930;CON__ENSEMBL:ENSBTAP00000025008;IPI00006510;IPI00739915;IPI00908605;IPI00945362	Tubulin beta-2 chain;Tubulin beta-2C chain;Class IVb beta tubulin;Tubulin, beta 2C;TUBB2C protein;Tubulin beta 2C;cDNA FLJ11352 fis, clone HEMBA1000020, highly similar to Tubulin beta-2C chain;Tubulin 5 beta;Tubulin beta-4 chain;cDNA FLJ55189, highly similar to Tubulin beta-4 chain;cDNA FLJ52029, highly similar to Tubulin beta-7 chain;XTP3TPA-transactivated protein 1;Tubulin beta polypeptide;Tubu…	TUBB2C;TUBB4;TUBB5;XTP3TPATP1;DAAP-285E11.4-002;DADB-118P11.3-002;DAMA-26D6.3-002;DAMC-316D20.4-002;DAQB-47P19.9-002;DASS-191K16.2-002;TUBB;XXbac-BCX111D4.2-002;XXbac-BPG252P9.4-002;TUBB8	Tubulin beta-2C chain;cDNA FLJ11352 fis, clone HEMBA1000020, highly similar to Tubulin beta-2C chain;Tubulin beta-4 chain;Tubulin, beta;cDNA FLJ53341, highly similar to Tubulin beta-4 chain;Tubulin beta-8 chain	P68371;Q8IWP6;Q8IZ29;Q8N6N5;Q96HX0;A4UCT2;B3KML9;P04350;B4DE77;B4DXZ5;Q1KSF8;Q5ST81;Q6P602;Q96B85;Q9BUU9;B4DJ43;Q3ZCM7	5	9	7	15	13	11	1	1	1	1	2	1	23.8	49.83	445	8433400	7130700	6380500	8125900	2537700	3666400
177	IPI00007755;IPI00790578	Ras-related protein Rab-21;KIAA0118 protein	KIAA0118;RAB21	Ras-related protein Rab-21;5 kDa protein	Q9UL25;Q96GX3	0	2	1	1	1	0	1	2	1	1	1	1	11.1	24.347	225	0	191680	221470	268980	12315	32767
178	IPI00007765;IPI00922694	75 kDa glucose-regulated protein;Heat shock 70 kDa protein 9;Mortalin;Peptide-binding protein 74;Stress-70 protein, mitochondrial;cDNA FLJ51811, highly similar to Stress-70 protein, mitochondrial;cDNA FLJ51907, highly similar to Stress-70 protein, mitochondrial;Heat shock 70 kDa protein 9B;HSPA9 protein;Catecholamine-regulated protein 40;cDNA FLJ51903, highly similar to Stress-70 protein, mitocho…	GRP75;HSPA9;HSPA9B	Stress-70 protein, mitochondrial;cDNA FLJ51903, highly similar to Stress-70 protein, mitochondrial	P38646;B7Z1V7;B7Z4V2;Q2F839;Q8N1C8;A1XP52;B7Z4T3	1	6	5	3	8	10	6	10	7	7	9	11	24.4	73.68	679	161970	3910500	3308300	1584800	386530	301920
179	IPI00007797;IPI00737213;IPI00788781	Epidermal-type fatty acid-binding protein;Fatty acid-binding protein 5;Fatty acid-binding protein, epidermal;Psoriasis-associated fatty acid-binding protein homolog;Putative uncharacterized protein FABP5	FABP5	Fatty acid-binding protein, epidermal;15 kDa protein;Putative uncharacterized protein FABP5	Q01469;A8MTQ5	1	5	3	3	4	4	3	5	3	4	5	4	40.7	15.164	135	2154100	3805200	4222600	3998600	389350	1264000
180	IPI00007812;IPI00304911;IPI00926751;IPI00848320;IPI00925534;IPI00925827	Endomembrane proton pump 58 kDa subunit;HO57;Vacuolar proton pump subunit B 2;V-type proton ATPase subunit B, brain isoform;cDNA FLJ51779, highly similar to Vacuolar ATP synthase subunit B, brain isoform (EC 3.6.3.14);cDNA FLJ53854, highly similar to Vacuolar ATP synthase subunit B, brain isoform (EC 3.6.3.14);ATPase, H+ transporting, lysosomal 56/58kD, V1 subunit B, isoform 2 variant;Vacuolar pr…	ATP6B2;ATP6V1B2;VPP3;ATP6B1;ATP6V1B1;VATB	V-type proton ATPase subunit B, brain isoform;V-type proton ATPase subunit B, kidney isoform;Putative uncharacterized protein ATP6V1B1;ATPase, V1 complex, subunit B family protein;Putative uncharacterized protein ATP6V1B1;Putative uncharacterized protein A	P21281;B2R5Z3;B4DFM5;B4DQI9;Q59HF3;P15313;B4DWH7;Q71UA2;C9JL73;C9JNS9;C9J5E3	0	0	1	1	0	1	1	0	1	2	1	1	4.1	56.5	511	21400	0	92536	69739	82666	130820
182	IPI00008034	Ras-related protein Rab-23	HSPC137;RAB23	Ras-related protein Rab-23	Q9ULC3	0	0	0	0	1	1	0	0	0	0	1	1	6.8	26.659	237	0	0	0	0	3008	56499
183	IPI00008164	Post-proline cleaving enzyme;Prolyl endopeptidase;cDNA, FLJ94921, highly similar to Homo sapiens prolyl endopeptidase (PREP), mRNA;Prolyl oligopeptidase	PEP;PREP	Prolyl endopeptidase	P48147;B2RAH7;Q9UM02	0	0	0	0	0	1	0	0	1	0	1	1	1.5	80.699	710	0	0	40318	0	33876	21724
184	IPI00008167;IPI00787965;IPI00946353;IPI00788784;IPI00789521;IPI00793333;IPI00952896	Sodium/potassium-dependent ATPase subunit beta-3;Sodium/potassium-transporting ATPase subunit beta-3;cDNA FLJ50753, highly similar to Sodium/potassium-transporting ATPase subunit beta-3;Putative uncharacterized protein ATP1B3	ATP1B3	Sodium/potassium-transporting ATPase subunit beta-3;cDNA FLJ50753, highly similar to Sodium/potassium-transporting ATPase subunit beta-3;Putative uncharacterized protein ATP1B3;16 kDa protein;15 kDa protein;Putative uncharacterized protein ATP1B3;Putative	P54709;B7Z1N7;C9JA36;C9JA09;C9JXZ1;C9JDJ0	0	0	0	0	1	0	0	0	1	0	1	0	4.7	31.512	279	0	0	3142.6	0	74608	0
185	IPI00008219	UV excision repair protein RAD23 homolog A;cDNA FLJ78534, highly similar to Homo sapiens RAD23 homolog A (S. cerevisiae), mRNA;cDNA FLJ51789, highly similar to UV excision repair protein RAD23 homolog A;UV excision repair protein RAD23 homolog A variant;RAD23 homolog A (S. cerevisiae)	RAD23A	UV excision repair protein RAD23 homolog A	P54725;A8K1J3;B4DDJ7;Q59EU8;Q5M7Z1	0	0	0	0	1	1	0	0	0	0	1	1	7.2	39.609	363	0	0	0	0	25791	77911
186	IPI00008223;IPI00642549;IPI00643078;IPI00479614	UV excision repair protein RAD23 homolog B;XP-C repair-complementing complex 58 kDa protein;cDNA FLJ50817, highly similar to UV excision repair protein RAD23 homolog B;cDNA, FLJ79088, highly similar to UV excision repair protein RAD23 homolog B;UV excision repair protein RAD23 homolog B variant;RAD23-like protein B;cDNA FLJ56531, highly similar to UV excision repair protein RAD23 homolog B;RAD23 …	RAD23B;RP11-131A5.1-002;RP11-131A5.1-003	UV excision repair protein RAD23 homolog B;cDNA FLJ56531, highly similar to UV excision repair protein RAD23 homolog B;RAD23 homolog B	P54727;B7Z4W4;B7ZA74;Q53F10;Q7Z5K8;B4DEA3;Q5W0S5;Q5W0S4	1	3	1	0	0	1	0	2	0	0	0	1	8.3	43.171	409	159100	491620	882030	122460	0	81302
187	IPI00008274;IPI00639931;IPI00939159;IPI00645789;IPI00646869;IPI00644589;IPI00641881;IPI00647351;IPI00644109;IPI00646269;IPI00642414;IPI00514858;IPI00954082	Adenylyl cyclase-associated protein 1;Adenylyl cyclase-associated protein	CAP;CAP1	Isoform 1 of Adenylyl cyclase-associated protein 1;Isoform 2 of Adenylyl cyclase-associated protein 1;Adenylyl cyclase-associated protein	Q01518-1;Q01518;B2RDY9;B4DI38;B4DNW7;B4DNY3;Q01518-2;B4DNA3;B4DUZ8	3	8	8	10	8	6	5	6	6	9	9	7	29.5	51.855	475	3710600	4124700	4250900	2835900	634240	878540
188	IPI00008433;IPI00555941	40S ribosomal protein S5;40S ribosomal protein S5, N-terminally processed;Ribosomal protein S5 variant	RPS5	40S ribosomal protein S5	P46782;Q53G25	0	3	4	1	1	1	2	3	2	3	3	2	16.7	22.876	204	73501	1970400	1649800	484880	219020	236130
189	IPI00025842;IPI00749512;IPI00008438;IPI00478810;IPI00398673;IPI00414852	Putative 40S ribosomal protein S10-like;Ribosomal protein S10 variant;40S ribosomal protein S10;Ribosomal protein S10	RPS10L;RPS10P5;RPS10;RP11-375E1__A.4-005	Putative 40S ribosomal protein S10-like protein;Ribosomal protein S10 variant (Fragment);40S ribosomal protein S10;Ribosomal protein S10;17 kDa protein;15 kDa protein	Q9NQ39;Q59GE4;P46783;Q5TZB9	0	0	0	0	1	1	0	0	0	1	2	1	11.9	20.12	176	0	0	0	77394	397370	35362
190	IPI00008454	APOBEC1-binding protein 2;DnaJ homolog subfamily B member 11;DnaJ protein homolog 9;ER-associated DNAJ;ER-associated dnaJ protein 3;ER-associated Hsp40 co-chaperone;HEDJ;Human DnaJ protein 9;PWP1-interacting protein 4;cDNA FLJ42295 fis, clone TLIVE2008213, highly similar to DnaJ homolog subfamily B member 11;cDNA FLJ56253, highly similar to DnaJ homolog subfamily B member 11	DNAJB11;EDJ;ERJ3;HDJ9;PSEC0121;UNQ537/PRO1080	DnaJ homolog subfamily B member 11	Q9UBS4;B3KW63	0	0	0	0	1	0	0	0	0	0	1	0	4.5	40.513	358	0	0	0	0	36306	0
191	IPI00008475	3-hydroxy-3-methylglutaryl coenzyme A synthase;Hydroxymethylglutaryl-CoA synthase, cytoplasmic;3-hydroxy-3-methylglutaryl-Coenzyme A synthase 1 (Soluble);cDNA FLJ38173 fis, clone FCBBF1000053, highly similar to HYDROXYMETHYLGLUTARYL-COA SYNTHASE, CYTOPLASMIC	HMGCS;HMGCS1	Hydroxymethylglutaryl-CoA synthase, cytoplasmic	Q01581;Q5XJ04;Q8N995	0	1	0	0	0	0	0	1	0	1	0	0	4.6	57.293	520	0	73333	0	51624	0	0
192	IPI00008483	Amine oxidase [flavin-containing] A;Monoamine oxidase type A;cDNA FLJ61220, highly similar to Amine oxidase (flavin-containing) A (EC 1.4.3.4);Monoamine oxidase A;Monoamine oxidase A variant;cDNA FLJ76052, highly similar to Homo sapiens monoamine oxidase A (MAOA), nuclear gene encoding mitochondrial protein, mRNA;Monoamine oxidase A, isoform CRA_a	MAOA;hCG_16826;RP1-201D17__B.2-001	Amine oxidase [flavin-containing] A	P21397;B4DF46;Q49A63;Q53EZ0;Q53YE7;Q5UL91;Q5UL94;Q5ULA3;Q5ULA9	1	1	1	2	4	2	1	0	0	0	4	4	10.1	59.681	527	805290	28731	351560	338360	210150	229420
193	IPI00008485;IPI00643595;IPI00930318	Citrate hydro-lyase;Cytoplasmic aconitate hydratase;Ferritin repressor protein;Iron regulatory protein 1;Iron-responsive element-binding protein 1	ACO1;IREB1;IRP1	Cytoplasmic aconitate hydratase	P21399;Q5VZA7;Q9HBB2	0	1	0	0	0	2	0	1	1	0	1	2	3.9	98.398	889	0	0	0	0	49876	40575
194	IPI00008524;IPI00909378;IPI00410017;IPI00301154;IPI00794246;IPI00796945;IPI00642904;IPI00012726;IPI00555747;IPI00642944;IPI00790842;IPI00644016	Polyadenylate-binding protein 1;cDNA FLJ57246, highly similar to Poly(A)-binding protein 1;cDNA FLJ59219, highly similar to Poly(A)-binding protein 1;Polyadenylate-binding protein 3;Testis-specific poly(A)-binding protein;PABP3;Poly(A) binding protein, cytoplasmic 3;cDNA, FLJ93858, highly similar to Homo sapiens poly(A) binding protein, cytoplasmic 3 (PABPC3), mRNA;cDNA FLJ37875 fis, clone BRSSN2…	PAB1;PABP1;PABPC1;PABPC2;PABP3;PABPC3;PABPL3;hCG_1774619;RP11-165I9.5-001	Isoform 1 of Polyadenylate-binding protein 1;cDNA FLJ59219, highly similar to Poly(A)-binding protein 1;Isoform 2 of Polyadenylate-binding protein 1;Polyadenylate-binding protein 3;36 kDa protein;cDNA FLJ37875 fis, clone BRSSN2018771, highly similar to Pol	P11940-1;P11940;B4DZW4;B4DQX0;P11940-2;Q9H361;Q2VIP3;Q3ZCS4;Q5VX58;B3KT93	0	4	0	0	2	2	0	3	1	0	5	4	8	70.67	636	0	1800000	17268	0	12619	9996.7
195	IPI00008529	60S acidic ribosomal protein P2;Renal carcinoma antigen NY-REN-44;cDNA, FLJ92222, Homo sapiens ribosomal protein, large P2 (RPLP2), mRNA;Ribosomal protein, large, P2, isoform CRA_a;RPLP2 protein	D11S2243E;RPLP2;RPP2;hCG_1778304	60S acidic ribosomal protein P2	P05387;Q6FG96	0	0	0	0	4	1	1	2	2	2	3	2	50.4	11.665	115	47651	15194	72033	63865	2075800	725110
196	IPI00008530;IPI00556485;IPI00871646;IPI00794884;IPI00868999;IPI00793002;IPI00791188;IPI00797741;IPI00791448;IPI00790287;IPI00798371;IPI00940411	60S acidic ribosomal protein P0;60S ribosomal protein L10E;cDNA FLJ75549, highly similar to Homo sapiens ribosomal protein, large, P0 (RPLP0), transcript variant 1, mRNA;Ribosomal protein P0 variant;RPLP0 protein;60S acidic ribosomal protein P0-like;cDNA FLJ51469, highly similar to 60S acidic ribosomal protein P0	RPLP0	60S acidic ribosomal protein P0;RPLP0 protein;60S acidic ribosomal protein P0-like;24 kDa protein;60S acidic ribosomal protein P0;19 kDa protein;18 kDa protein;17 kDa protein;cDNA FLJ51469, highly similar to 60S acidic ribosomal protein P0;15 kDa protein;1	P05388;A8K4Z4;Q53HK9;Q53HW2;Q3B7A4;Q6NSF2;Q8NHW5;B4E3D5;Q3MHV2	0	0	1	2	7	4	1	2	3	2	5	4	30	34.273	317	696440	202940	219970	2032600	2260500	55645
197	IPI00008575;IPI00479209;IPI00385834;IPI00082310;IPI00166708;IPI00008570;IPI00903310;IPI00744983	GAP-associated tyrosine phosphoprotein p62;KH domain-containing, RNA-binding, signal transduction-associated protein 1;p21 Ras GTPase-activating protein-associated p62;p68;Src-associated in mitosis 68 kDa protein;cDNA, FLJ93365, highly similar to Homo sapiens KH domain containing, RNA binding, signal transduction associated 1 (KHDRBS1), mRNA;cDNA FLJ54590, highly similar to KH domain-containing, …	KHDRBS1;SAM68;hCG_41606;KHDRBS2;SLM1;KHDRBS3;SALP;SLM2	Isoform 1 of KH domain-containing, RNA-binding, signal transduction-associated protein 1;cDNA FLJ54590, highly similar to KH domain-containing, RNA-binding, signaltransduction-associated protein 1;Isoform 2 of KH domain-containing, RNA-binding, signal tran	Q07666-1;Q07666;B2R7B5;B4DDX2;B4E043;Q07666-2;Q07666-3;Q5VWX1;O75525-1;O75525;B3KTS3;O75525-2	0	0	0	0	1	0	1	0	0	0	1	0	2	48.227	443	57937	0	0	0	157590	0
198	IPI00930343;IPI00008603;IPI00023006;IPI00021428;IPI00922693;IPI00878173;IPI00514530;IPI00954527;IPI00414057;IPI00921887;IPI00645534;IPI00917820	cDNA FLJ78096, highly similar to Homo sapiens actin, alpha, cardiac muscle (ACTC), mRNA;Actin, aortic smooth muscle;Alpha-actin-2;Cell growth-inhibiting gene 46 protein;cDNA FLJ32030 fis, clone NTONG2000040, highly similar to Actin, alpha cardiac;cDNA FLJ52761, highly similar to Actin, aortic smooth muscle;Actin-like protein;Actin, alpha cardiac muscle 1;Alpha-cardiac actin;Actin, alpha skeletal …	ACTA2;ACTSA;ACTVS;GIG46;ACT;ACTC;ACTC1;ACTA;ACTA1;RP5-1068B5.2-002;RP5-1068B5.2-003	cDNA FLJ78096, highly similar to Homo sapiens actin, alpha, cardiac muscle (ACTC), mRNA;Actin, aortic smooth muscle;Actin, alpha cardiac muscle 1;Actin, alpha skeletal muscle;cDNA FLJ53662, highly similar to Actin, alpha skeletal muscle;cDNA FLJ39583 fis,	A8K3K1;P62736;B3KPP5;B4DUI8;Q562S2;P68032;P68133;B7Z6P1;B3KUD3;Q5T8M7;A6NL76;Q5T8M8;Q13707;Q7Z7J6	2	1	1	1	20	10	0	0	0	1	1	1	42.7	42.047	377	5472100	138050	175130	294580	105020000	35465000
199	IPI00008613;IPI00218475;IPI00943264	Interferon-induced 35 kDa protein;Putative uncharacterized protein IFI35	IFI35;IFP35	Putative uncharacterized protein IFI35;Isoform 2 of Interferon-induced 35 kDa protein;32 kDa protein	P80217-1;P80217;C9JGX1;P80217-2	0	1	0	0	0	0	0	1	0	1	0	0	3.1	31.776	288	0	157090	0	38119	0	0
200	IPI00008708;IPI00642046	CATX-11;Cellular senescence-inhibited gene protein;Protein PBK1;Ribosomal L1 domain-containing protein 1;RSL1D1 protein;cDNA FLJ52304, highly similar to Ribosomal L1 domain-containing protein 1	CATX11;CSIG;L12;PBK1;RSL1D1	Ribosomal L1 domain-containing protein 1;RSL1D1 protein	O76021;A0PJ87;B4DJ58;Q32Q62;A0PJ61	0	0	0	0	0	1	0	0	0	0	1	1	2	54.972	490	0	0	0	0	8919.8	41857
201	IPI00008730	Secretagogin	SCGN;SECRET	Secretagogin	O76038;A8K0B2	0	0	0	0	1	1	0	0	0	0	1	1	5.1	32.039	276	0	0	0	0	126790	113130
202	IPI00008752;IPI00872408;IPI00008753;IPI00022498;IPI00413064;IPI00307016;IPI00008750;IPI00025460;IPI00457184	Metallothionein-1G;Metallothionein-1K;Metallothionein-IG;Metallothionein;Metallothionein-1X;Metallothionein-IX;Metallothionein-2;Metallothionein-2A;Metallothionein-II;Metallothionein-0;Metallothionein-1H;Metallothionein-IH;Metallothionein-1A;Metallothionein-IA	MT1G;MT1K;MT1M;MT1X;CES1;MT2;MT2A;MT1H;MT1A;MT1S	Isoform 1 of Metallothionein-1G;Metallothionein;Metallothionein-1X;Metallothionein-2;Isoform 2 of Metallothionein-1G;6 kDa protein;Metallothionein-1H;Metallothionein-1A;Metallothionein (Fragment)	P13640-1;P13640;A8MT68;P80297;Q8WVB5;P02795;Q8TE66;P13640-2;P80294;B2RUY6;P04731;A6NER9	1	1	2	2	0	1	1	1	1	1	0	1	32.3	6.1414	62	55922	89891	229320	106160	0	45507
203	IPI00883896;IPI00008918;IPI00796705;IPI00940308;IPI00796222	Epithelial protein lost in neoplasm beta variant;Epithelial protein lost in neoplasm;LIM domain and actin-binding protein 1;cDNA FLJ38853 fis, clone MESAN2010321, highly similar to LIM domain and actin-binding protein 1;cDNA FLJ55990, highly similar to LIM domain and actin-binding protein 1	EPLIN;LIMA1;PP624;SREBP3	LIM domain and actin binding 1 isoform a;Isoform Beta of LIM domain and actin-binding protein 1;cDNA FLJ55990, highly similar to LIM domain and actin-binding protein 1;LIM domain and actin binding 1 isoform c;67 kDa protein	Q53GG0;Q59FE8;Q9UHB6-1;Q9UHB6;B2RB09;Q9UHB6-2;B3KTW2;B4DN52	0	0	0	1	0	0	0	1	0	1	0	0	1.6	85.223	760	0	7625.9	0	97969	0	0
204	IPI00303726;IPI00008922;IPI00873794;IPI00914923;IPI00300620;IPI00871741	Interferon-induced transmembrane protein 3;Interferon-inducible protein 1-8U;cDNA FLJ76420, highly similar to Homo sapiens interferon induced transmembrane protein 3 (1-8U) (IFITM3), mRNA;HCG2036716;Interferon induced transmembrane protein 3 (1-8U);Interferon-induced transmembrane protein 2;Interferon-inducible protein 1-8D;IFITM2 protein;Interferon induced transmembrane protein 2 (1-8D);Interfer…	IFITM3;hCG_2036716;IFITM2;CD225;IFI17;IFITM1;hCG_1741134	Interferon-induced transmembrane protein 3;Interferon-induced transmembrane protein 2;interferon induced transmembrane protein 2;15 kDa protein;Interferon-induced transmembrane protein 1;Putative uncharacterized protein IFITM1 (Fragment)	Q01628;Q53Y76;Q01629;Q6IBB0;Q6FH82;P13164;Q53XZ0;A8MX58	0	0	1	0	0	0	0	0	1	1	0	0	12	14.632	133	0	0	246350	10424	0	0
205	IPI00008934;IPI00945760	3-hydroxy-3-methylglutaryl coenzyme A synthase;Hydroxymethylglutaryl-CoA synthase, mitochondrial;HMGCS2 protein;cDNA FLJ51350, highly similar to Hydroxymethylglutaryl-CoA synthase, mitochondrial (EC 2.3.3.10);cDNA FLJ60950, highly similar to Hydroxymethylglutaryl-CoA synthase, mitochondrial (EC 2.3.3.10);cDNA FLJ56838, highly similar to Hydroxymethylglutaryl-CoA synthase, mitochondrial (EC 2.3.3.…	HMGCS2	Hydroxymethylglutaryl-CoA synthase, mitochondrial;hydroxymethylglutaryl-CoA synthase 2 isoform 2 precursor	P54868;Q6IBF4;B7Z784;B7Z7M8;B7Z8R3	0	1	0	8	4	5	1	3	3	5	5	5	15.7	56.635	508	1363.7	73497	38310	2777800	88070	516580
206	IPI00008943;IPI00019918;IPI00027599;IPI00939593;IPI00155054	ATP-dependent RNA helicase DDX19B;DEAD box protein 19B;DEAD box RNA helicase DEAD5;DDX19B protein;DEAD (Asp-Glu-Ala-As) box polypeptide 19 variant;RNA helicase;ATP-dependent RNA helicase DDX19A;DDX19-like protein;DEAD box protein 19A;cDNA FLJ52463, highly similar to ATP-dependent RNA helicase DDX19A (EC 3.6.1.-);Putative uncharacterized protein DKFZp762C1313;cDNA FLJ52357, highly similar to ATP-d…	DBP5;DDX19;DDX19B;DDX19L;DDX19A;DKFZp762C1313;DKFZp686C21137	Isoform 1 of ATP-dependent RNA helicase DDX19B;ATP-dependent RNA helicase DDX19A;cDNA FLJ52357, highly similar to ATP-dependent RNA helicase DDX19B;Isoform 2 of ATP-dependent RNA helicase DDX19B;cDNA FLJ50635, highly similar to ATP-dependent RNA helicase D	Q9UMR2-1;Q9UMR2;B3KNE9;Q2NL95;Q53G16;Q7Z4W5;Q9HBZ9;Q9NUU7;B2RPL0;B4DRZ7;Q69YM2;B4DXS6;Q9UMR2-2;B4DS24;Q68DY7	0	1	0	0	0	0	0	1	0	0	0	0	2.1	53.926	479	0	47000	0	0	0	0
207	IPI00008964;IPI00896425;IPI00022134	Ras-related protein Rab-1B;Small GTP-binding protein;RAB1B protein;Putative small GTP-binding protein (Rab1b)	RAB1B;rab1b	Ras-related protein Rab-1B;RAB1B protein;Putative small GTP-binding protein	Q9H0U4;Q92927;Q6FIG4;Q9H1C9	0	1	0	0	1	0	0	1	1	1	1	1	18.4	22.171	201	0	203140	163600	120290	299380	115490
208	IPI00008998;IPI00787433;IPI00938044	Butyrate-induced protein 1;Protein tyrosine phosphatase-like protein PTPLAD1;Protein-tyrosine phosphatase-like A domain-containing protein 1;cDNA FLJ54138, highly similar to Homo sapiens butyrate-induced transcript 1 (HSPC121), mRNA	BIND1;PTPLAD1	Protein tyrosine phosphatase-like protein PTPLAD1;cDNA FLJ54138, highly similar to Homo sapiens butyrate-induced transcript 1 (HSPC121), mRNA;hypothetical protein XP_002347581	Q9P035;B4DRF4	0	0	0	0	1	1	0	0	0	0	1	1	3.9	43.159	362	0	0	0	0	138760	73061
209	IPI00009032;IPI00916802;IPI00916922;IPI00917386	La autoantigen;La ribonucleoprotein;Lupus La protein;Sjoegren syndrome type B antigen;Autoantigen La;La 4.1 protein;Ribonucleoprotein (La);Putative uncharacterized protein SSB;Sjogren syndrome antigen B (Autoantigen La);Sjogren syndrome antigen B (Autoantigen La), isoform CRA_c;SS-B/La protein	SSB;hCG_2005701	Lupus La protein;SS-B/La protein	P05455;B5BUB5;Q14730;Q15367;Q53XJ4;Q9UMH5;Q9UMH6	1	6	0	1	1	1	2	4	3	3	4	3	12	46.836	408	219660	1083100	42032	349980	70452	142770
210	IPI00009104;IPI00909925	48 kDa TATA box-binding protein-interacting protein;51 kDa erythrocyte cytosolic protein;INO80 complex subunit J;Repressing pontin 52;RuvB-like 2;TIP49b;TIP60-associated protein 54-beta;cDNA FLJ14856 fis, clone PLACE1001054, highly similar to RuvB-like 2 (EC 3.6.1.-);RuvB-like 2 (E. coli), isoform CRA_d;cDNA FLJ32936 fis, clone TESTI2007533, highly similar to RuvB-like 2 (EC 3.6.1.-);RuvB-like 2 …	CGI-46;INO80J;RUVBL2;TIP48;TIP49B;hCG_16214	RuvB-like 2;cDNA FLJ56743, highly similar to RuvB-like 2	Q9Y230;B3KNL2;B3KQ59;B4DW30	0	2	1	0	1	1	0	4	2	3	2	3	8.9	51.156	463	0	236910	34502	50752	114610	77517
211	IPI00009123;IPI00922708;IPI00902923	DNA-binding protein NEFA;Gastric cancer antigen Zg4;Nucleobindin-2;Nucleobindin 2;Nucb2 splice variant	NEFA;NUCB2;Nucb2	Isoform 1 of Nucleobindin-2;Isoform 2 of Nucleobindin-2;Nucb2 splice variant	P80303-1;P80303;P80303-2;A7LNF3;A7LNF4;A7LNF5;Q2L696	0	0	0	1	1	0	1	1	1	1	2	0	5.7	50.195	420	31463	173850	29834	42968	36770	0
212	IPI00009148	Diadenosine 5',5'''-P1,P6-hexaphosphate hydrolase 1;Diphosphoinositol polyphosphate phosphohydrolase 1;Nucleoside diphosphate-linked moiety X motif 3	DIPP;DIPP1;NUDT3	Diphosphoinositol polyphosphate phosphohydrolase 1	O95989	1	0	0	0	0	0	1	1	1	1	0	0	5.2	19.471	172	54599	47835	27057	91936	0	0
213	IPI00009236;IPI00876941;IPI00853146;IPI00759683;IPI00852906	Caveolin-1;Caveolin	CAV;CAV1;hCG_39088;tcag7.24	Isoform Alpha of Caveolin-1;Caveolin (Fragment);Caveolin	Q03135-1;Q03135;A9XTE5;Q2TNI1;Q59E85;Q7Z4F3	1	1	0	1	2	2	1	1	1	1	3	2	17.4	20.471	178	798520	242540	112010	759030	494990	350540
214	IPI00009253	Alpha-soluble NSF attachment protein;N-ethylmaleimide-sensitive factor attachment protein alpha	NAPA;SNAPA	Alpha-soluble NSF attachment protein	P54920	0	2	0	0	3	0	0	1	1	1	3	2	11.2	33.232	295	0	628550	10453	7169.8	106300	26171
215	IPI00009328	ATP-dependent RNA helicase DDX48;ATP-dependent RNA helicase eIF4A-3;DEAD box protein 48;Eukaryotic initiation factor 4A-III;Eukaryotic initiation factor 4A-like NUK-34;Eukaryotic translation initiation factor 4A isoform 3;Nuclear matrix protein 265	DDX48;EIF4A3;KIAA0111	Eukaryotic initiation factor 4A-III	P38919	1	0	1	0	0	1	1	1	1	1	0	1	5.1	46.871	411	57320	54431	215010	3811.8	0	0
216	IPI00009329;IPI00939218	Dystrophin-related protein 1;Utrophin;cDNA FLJ77189, highly similar to Homo sapiens utrophin (homologous to dystrophin) (UTRN), mRNA	DMDL;DRP1;UTRN	Utrophin;cDNA FLJ77189, highly similar to Homo sapiens utrophin (homologous to dystrophin) (UTRN), mRNA (Fragment)	P46939;A8K8Z1	0	0	0	0	0	1	0	0	0	0	0	2	0.6	394.46	3433	0	0	0	0	0	19629
217	IPI00009342;IPI00328905	p195;Ras GTPase-activating-like protein IQGAP1;IQ motif containing GTPase activating protein 1;cDNA FLJ55816, highly similar to Ras GTPase-activating-like protein IQGAP1;cDNA FLJ55443, highly similar to Ras GTPase-activating-like protein IQGAP1;IQGAP1 protein	IQGAP1;KIAA0051	Ras GTPase-activating-like protein IQGAP1	P46940;A4QPB0;B4DNP4;B4E2M0;Q05DN7;Q5FWG8;Q6P1N4;Q96PA3	1	5	5	5	19	18	7	11	9	11	20	17	20.4	189.25	1657	853950	2576200	2093200	639040	2924400	1763700
218	IPI00009407	Defender against cell death 1;Dolichyl-diphosphooligosaccharide--protein glycosyltransferase subunit DAD1;Defender against cell death 1 variant	DAD1	Dolichyl-diphosphooligosaccharide--protein glycosyltransferase subunit DAD1	P61803;Q53G02	1	5	2	2	2	2	1	3	3	1	3	3	24.8	12.497	113	883100	432270	1420400	706970	196610	104490
219	IPI00009542;IPI00477809;IPI00337823;IPI00941467;IPI00549529;IPI00910881	11B6;Breast cancer-associated gene 1 protein;Hepatocellular carcinoma-associated protein JCL-1;MAGE-D2 antigen;Melanoma-associated antigen D2;Putative uncharacterized protein MAGED2;Melanoma antigen family D, 2;Melanoma antigen family D, 2, isoform CRA_d;cDNA FLJ58171, moderately similar to Melanoma-associated antigen D2	BCG1;MAGED2;RP1-14O9.1-004;hCG_18665;RP1-14O9.1-005	Isoform 1 of Melanoma-associated antigen D2;Putative uncharacterized protein MAGED2;Isoform 2 of Melanoma-associated antigen D2;Melanoma antigen family D, 2;Putative uncharacterized protein MAGED2;cDNA FLJ58171, moderately similar to Melanoma-associated an	Q9UNF1-1;Q9UNF1;C9JMB9;Q9UNF1-2;Q5H909;Q5H907;B4DX55	0	0	0	1	0	0	0	0	1	1	0	0	1.7	64.953	606	0	0	2562.1	40928	0	0
220	IPI00009634;IPI00790715	Sulfide:quinone oxidoreductase, mitochondrial;cDNA, FLJ93596, highly similar to Homo sapiens sulfide quinone reductase-like (yeast) (SQRDL), mRNA;Sulfide dehydrogenase like;PRO1975	CGI-44;SQRDL	Sulfide:quinone oxidoreductase, mitochondrial;25 kDa protein	Q9Y6N5;B2R7T6;Q53HW7;Q9UHS8	0	2	2	2	8	3	1	4	4	3	6	4	22.7	49.96	450	130860	277920	331650	1012000	1917300	367250
221	IPI00009750	Antigen NY-CO-27;Galectin-4;L-36 lactose-binding protein;Lactose-binding lectin 4;cDNA FLJ51220, highly similar to Galectin-4;cDNA FLJ56716, highly similar to Galectin-4;cDNA FLJ76242, highly similar to Homo sapiens lectin, galactoside-binding, soluble, 4 (galectin 4) (LGALS4), mRNA;Lectin, galactoside-binding, soluble, 4 (Galectin 4);Lectin, galactoside-binding, soluble, 4 (Galectin 4), isoform …	LGALS4;hCG_20525	Galectin-4	P56470;B4DJR1;B4DKK5;Q6FHZ4	0	3	1	2	4	5	0	3	3	2	5	4	16.4	35.941	323	0	2117900	1202100	81849	5654600	4890000
222	IPI00009771;IPI00879819	Lamin-B2	LMN2;LMNB2	Lamin-B2;Lamin-B2	Q03252	0	3	2	2	11	8	3	7	8	5	10	10	23.4	69.948	620	28285	1719400	1341300	1011700	352760	682460
223	IPI00009790;IPI00643196;IPI00639981;IPI00642664;IPI00552290	6-phosphofructokinase type C;6-phosphofructokinase, platelet type;Phosphofructo-1-kinase isozyme C;Phosphofructokinase 1;Phosphohexokinase;cDNA FLJ35278 fis, clone PROST2006579, highly similar to 6-phosphofructokinase type C (EC 2.7.1.11);Phosphofructokinase-P;PFKP protein;Phosphofructokinase, platelet;Similar to phosphofructokinase, platelet	PFKF;PFKP;PFK-P;RP11-298E9.2-004	6-phosphofructokinase type C;cDNA FLJ35278 fis, clone PROST2006579, highly similar to 6-phosphofructokinase type C	Q01813;Q5VSR8;B3KS15;O14943;Q49A78;Q5VSR7;Q8WTZ9	0	1	0	0	2	2	0	1	0	0	3	1	8.3	85.595	784	0	0	0	0	274120	9575.3
224	IPI00009792;IPI00786926	Ig heavy chain V-I region V35;Myosin-reactive immunoglobulin heavy chain variable region		Ig heavy chain V-I region V35;Myosin-reactive immunoglobulin heavy chain variable region (Fragment)	P23083;C9JZH3;Q9UL89	0	0	0	0	0	1	0	1	0	1	1	1	10.3	13.009	117	0	1351.4	0	2623.7	15773	146340
225	IPI00106646;IPI00009794;IPI00930668;IPI00514755	45 kDa calcium-binding protein;Cab45;Stromal cell-derived factor 4;Stromal cell derived factor 4;Stromal cell derived factor 4, isoform CRA_b	CAB45;PSEC0034;SDF4;hCG_19193;RP5-902P8.6-007;RP5-902P8.6-006	Isoform 1 of 45 kDa calcium-binding protein;stromal cell derived factor 4 isoform 1 precursor;Isoform 3 of 45 kDa calcium-binding protein;Stromal cell derived factor 4	Q9BRK5-1;Q9BRK5;Q9BRK5-4;B1AME6;Q9BRK5-3;B1AME7	0	0	0	0	1	0	0	0	0	0	1	1	3.3	41.806	362	0	0	0	0	39225	6230.8
226	IPI00009802;IPI00215631;IPI00215628;IPI00215629;IPI00215630	Chondroitin sulfate proteoglycan core protein 2;Glial hyaluronate-binding protein;Large fibroblast proteoglycan;PG-M;Versican core protein;Chondroitin sulfate proteoglycan 2 (Versican) variant;cDNA FLJ50194, highly similar to Versican core protein;Putative uncharacterized protein DKFZp686K06110;cDNA FLJ50780, highly similar to Versican core protein;VCAN protein	CSPG2;VCAN;DKFZp686K06110	Isoform V0 of Versican core protein;Isoform Vint of Versican core protein;Isoform V1 of Versican core protein;Isoform V2 of Versican core protein;Isoform V3 of Versican core protein	P13611-1;P13611;Q59FG9;P13611-5;P13611-2;B7Z638;Q6MZK8;P13611-3;B7Z3R6;P13611-4;Q86W61	1	1	0	0	0	1	1	1	0	1	0	1	0.8	372.82	3396	131730	62748	0	16039	0	0
227	IPI00009829	Carboxypeptidase A3;Mast cell carboxypeptidase A;cDNA, FLJ94198, highly similar to Homo sapiens carboxypeptidase A3 (mast cell) (CPA3), mRNA	CPA3	Mast cell carboxypeptidase A	P15088;B2R941	0	0	1	0	5	4	0	2	3	0	4	4	10.8	48.699	417	0	20113	125370	0	1875100	5100800
228	IPI00009841;IPI00872855;IPI00879259;IPI00879242;IPI00065554;IPI00953325;IPI00293254;IPI00878484	cDNA FLJ31747 fis, clone NT2RI2007377, highly similar to RNA-BINDING PROTEIN EWS;Ewing sarcoma breakpoint region 1, isoform CRA_h;Ewing sarcoma breakpoint region 1 protein;EWS oncogene;RNA-binding protein EWS;Ewing sarcoma breakpoint region 1;Ewing sarcoma breakpoint region 1, isoform CRA_b;EWSR1 protein;Ewing sarcoma breakpoint region 1, isoform CRA_g;cDNA FLJ32119 fis, clone PEBLM1000034, highl…	EWSR1;hCG_2010995;EWS;AC002059.7-002;AC002059.7-007;AC002059.7-008	Ewing sarcoma breakpoint region 1 isoform 1;Isoform EWS of RNA-binding protein EWS;Ewing sarcoma breakpoint region 1 isoform 3;Ewing sarcoma breakpoint region 1;Ewing sarcoma breakpoint region 1 isoform 4;Putative uncharacterized protein EWSR1;Isoform EWS-	Q96MX4;Q01844-1;Q01844;Q96FE8;B0QYK0;B0QYK1;Q96MN4;C9JGE3;Q01844-2;C9JSG3	1	2	1	0	0	1	1	1	1	1	0	1	2.1	68.965	661	191420	157790	125120	232000	0	22965
229	IPI00449197;IPI00433025;IPI00385158;IPI00009844;IPI00941706	GMP reductase;GMP reductase 2;Guanosine 5'-monophosphate oxidoreductase 2;Full-length cDNA clone CS0DL005YG10 of B cells (Ramos cell line) of Homo sapiens (human);Guanosine monophosphate reductase 2, isoform CRA_e	GMPR2;hCG_40198	GMP reductase;guanosine monophosphate reductase 2 isoform 1;GMP reductase;GMP reductase 2;GMP reductase	Q6PKC0;Q7Z527;Q9P2T1;Q86SZ5;Q86T14	0	0	0	2	0	0	0	0	1	2	1	1	6.1	45.007	409	0	0	8085.2	217110	513.02	675.98
230	IPI00009885;IPI00789642;IPI00791084;IPI00794245;IPI00793091	19 kDa FK506-binding protein;FK506-binding protein 11;Peptidyl-prolyl cis-trans isomerase FKBP11;Rotamase;cDNA FLJ53772, highly similar to FK506-binding protein 11 (EC 5.2.1.8);FK506 binding protein 11, 19 kDa, isoform CRA_b;FKBP11 protein	FKBP11;FKBP19;UNQ336/PRO535;hCG_1642966	FK506-binding protein 11;FK506 binding protein 11 isoform 3 precursor;16 kDa protein;15 kDa protein;10 kDa protein	Q9NYL4;B4DWB7;Q86SR8	0	0	0	0	1	0	0	1	0	0	1	1	4	22.18	201	0	24777	0	0	50766	29854
231	IPI00009904;IPI00852792;IPI00852730	Endoplasmic reticulum resident protein 70;Endoplasmic reticulum resident protein 72;Protein disulfide-isomerase A4;cDNA FLJ78033, highly similar to Homo sapiens protein disulfide isomerase family A, member 4, mRNA	ERP70;ERP72;PDIA4	Protein disulfide-isomerase A4	P13667;A8K4K6;Q549T6	3	11	6	5	11	13	4	9	8	7	13	11	27.1	72.932	645	5065300	4492800	4134500	1463000	661990	805870
232	IPI00009943;IPI00550900;IPI00908553;IPI00014402;IPI00910288;IPI00643765;IPI00384863	Tumor protein, translationally-controlled 1;Fortilin;Histamine-releasing factor;p23;Translationally-controlled tumor protein;cDNA FLJ57738, highly similar to Translationally-controlled tumor protein;BJ-HCC-24 tumor antigen;CDNA FLJ20030 fis, clone ADSU02156;cDNA FLJ57742;TPT1 protein;Tumor protein, translationally-controlled 1, isoform CRA_a;HDCMB21P	RP11-290D2.1-004;TPT1;hCG_32792;RP11-290D2.1-002	Tumor protein, translationally-controlled 1;Translationally-controlled tumor protein;cDNA FLJ57738, highly similar to Translationally-controlled tumor protein;CDNA FLJ20030 fis, clone ADSU02156;cDNA FLJ57742;Tumor protein, translationally-controlled 1, iso	Q5W0H4;P13693;B4DKJ4;Q9NXW1;B4DLD6;Q86YH5;Q8TBK7;Q9UP43	0	0	0	1	1	0	1	1	1	1	1	0	10.6	21.525	188	35318	288130	32889	147410	0	0
233	IPI00009950	Glycoprotein GP36b;Lectin mannose-binding 2;Vesicular integral-membrane protein VIP36;cDNA FLJ75774, highly similar to Homo sapiens lectin, mannose-binding 2 (LMAN2), mRNA;cDNA FLJ52285, highly similar to Vesicular integral-membrane protein VIP36	C5orf8;LMAN2	Vesicular integral-membrane protein VIP36	Q12907;A8K7T4;B4DWN1	1	2	1	1	2	3	1	2	2	1	2	2	5.6	40.228	356	331820	342200	190700	322730	73610	99815
234	IPI00009958;IPI00556139;IPI00791857;IPI00792995	COP9 signalosome complex subunit 5;Jun activation domain-binding protein 1;COP9 signalosome subunit 5 variant	COPS5;CSN5;JAB1	COP9 signalosome complex subunit 5;COP9 signalosome subunit 5 variant (Fragment);11 kDa protein;11 kDa protein	Q92905;Q59GH5	0	1	0	0	0	0	0	1	0	1	1	0	3	37.578	334	0	86639	0	8973.4	7038.7	0
235	IPI00009960;IPI00554469;IPI00470829;IPI00926611;IPI00940432;IPI00925553;IPI00910079;IPI00916765;IPI00655644;IPI00917497	Cell proliferation-inducing gene 4/52 protein;Mitochondrial inner membrane protein;Mitofilin;p87/89;cDNA, FLJ92546, highly similar to Homo sapiens inner membrane protein, mitochondrial (mitofilin) (IMMT), mRNA;cDNA FLJ51884, highly similar to Mitochondrial inner membrane protein;cDNA FLJ54290, highly similar to Mitochondrial inner membrane protein;cDNA FLJ59388, highly similar to Mitochondrial in…	HMP;IMMT;PIG4;PIG52	Isoform 1 of Mitochondrial inner membrane protein;Isoform 2 of Mitochondrial inner membrane protein;Isoform 3 of Mitochondrial inner membrane protein;Putative uncharacterized protein IMMT;inner membrane protein, mitochondrial isoform 2;Putative uncharacter	Q16891-1;Q16891;B2R5N6;Q16891-2;B4DKR1;B4DS66;Q16891-3;B4DQY2;B9A067;C9J406;C9JJ24;B4DT20;B8ZZQ7	0	2	1	1	1	2	2	4	2	2	3	2	7.9	83.677	758	5555.4	33797	22504	202290	133210	417130
236	IPI00010105	B(2)GCN homolog;B4 integrin interactor;CAB;Eukaryotic translation initiation factor 6;p27(BBP)	EIF3A;EIF6;ITGB4BP;OK/SW-cl.27	Eukaryotic translation initiation factor 6	P56537	0	0	0	0	1	0	0	1	0	0	1	0	4.5	26.599	245	0	708.52	0	0	69687	0
237	IPI00010130;IPI00942956	Glutamate decarboxylase;Glutamate--ammonia ligase;Glutamine synthetase;cDNA FLJ57219, highly similar to Glutamine synthetase (EC 6.3.1.2);Proliferation-inducing protein 43;cDNA FLJ35555 fis, clone SPLEN2004773, highly similar to GLUTAMINE SYNTHETASE;Putative uncharacterized protein DKFZp434M0813	GLNS;GLUL;hCG_24393;PIG59;PIG43;DKFZp434M0813	Glutamine synthetase;Proliferation-inducing protein 43	P15104;A1L199;A8YXX4;B4DWM6;Q2TU80;Q9NSP3	0	0	1	1	0	0	1	1	1	1	0	0	2.7	42.064	373	12153	57470	183050	69118	0	0
238	IPI00010133;IPI00642725;IPI00908906;IPI00791485;IPI00903139;IPI00789933;IPI00034860;IPI00783124;IPI00939459;IPI00903270;IPI00446617	Coronin-1A;Coronin-like protein A;Coronin-like protein p57;Tryptophan aspartate-containing coat protein	CORO1;CORO1A	Coronin-1A;40 kDa protein	P31146	1	5	5	4	2	2	4	6	4	5	4	3	18.7	51.026	461	25634	9878200	113340	232080	43738	44924
239	IPI00010153;IPI00795408;IPI00791920;IPI00794091;IPI00795751	60S ribosomal protein L17;60S ribosomal protein L23;Similar to ribosomal protein L23;Putative uncharacterized protein RPL23	RPL23	60S ribosomal protein L23;15 kDa protein;13 kDa protein;Putative uncharacterized protein RPL23;Putative uncharacterized protein RPL23	P62829;Q9BTQ7;B9ZVP7;C9JD32	0	0	1	0	2	0	1	1	1	1	1	1	21.4	14.865	140	326650	533930	879510	569670	0	0
240	IPI00010154;IPI00910113	Guanosine diphosphate dissociation inhibitor 1;Oligophrenin-2;Protein XAP-4;Rab GDP dissociation inhibitor alpha;cDNA FLJ58843, highly similar to Rab GDP dissociation inhibitor alpha;cDNA FLJ53519, highly similar to Rab GDP dissociation inhibitor alpha;cDNA FLJ52902, highly similar to Rab GDP dissociation inhibitor alpha	GDI1;GDIL;OPHN2;RABGDIA;XAP4	Rab GDP dissociation inhibitor alpha;cDNA FLJ52902, highly similar to Rab GDP dissociation inhibitor alpha	P31150;B4DH24;B4E070;B4DHX4	0	0	0	0	2	2	0	1	0	0	2	2	12.1	50.582	447	0	101120	0	0	178000	80825
241	IPI00010157;IPI00916229	Methionine adenosyltransferase 2;Methionine adenosyltransferase II;S-adenosylmethionine synthase isoform type-2;S-adenosylmethionine synthetase	AMS2;MAT2A;MATA2;hCG_34602	S-adenosylmethionine synthetase isoform type-2;S-adenosylmethionine synthetase	P31153;B4DEX8;B4DN45	0	0	0	0	1	1	0	0	0	0	1	1	3.8	43.66	395	0	0	0	0	175510	26730
242	IPI00607801;IPI00010180;IPI00607693;IPI00008367;IPI00939365	Acyl-coenzyme A:cholesterol acyltransferase;Brain carboxylesterase hBr1;Cocaine carboxylesterase;Egasyn;HMSE;Liver carboxylesterase 1;Monocyte/macrophage serine esterase;Retinyl ester hydrolase;Serine esterase 1;Triacylglycerol hydrolase;cDNA FLJ57637, highly similar to Liver carboxylesterase 1 (EC 3.1.1.1);Placental carboxylesterase 3;Putative inactive carboxylesterase 4	CES1;CES2;SES1;CES4	Isoform 2 of Liver carboxylesterase 1;Isoform 1 of Liver carboxylesterase 1;carboxylesterase 1 isoform c precursor;Similar to Liver carboxylesterase 1 precursor (EC 3.1.1.1) (Acyl coenzyme A:cholesterol acyltransferase) (ACAT) (Monocyte/macrophage serine e	P23141-2;P23141;P23141-1;B7Z795;Q9UKY3-2;Q9UKY3;Q9UKY3-1	0	0	0	0	1	2	0	0	0	0	1	1	4.6	62.591	568	0	0	0	0	69738	0
243	IPI00010182	Acyl-CoA-binding protein;Diazepam-binding inhibitor;Endozepine;Diazepam binding inhibitor, splice form 1D(1)	DBI	Isoform 1 of Acyl-CoA-binding protein	P07108-1;P07108;B8ZWD8	0	1	1	1	0	0	1	1	1	1	1	1	8	10.044	87	5746.8	385870	77468	40096	30324	33973
244	IPI00010204;IPI00843996	Pre-mRNA-splicing factor SRP20;Splicing factor, arginine/serine-rich 3;cDNA, FLJ92926, Homo sapiens splicing factor, arginine/serine-rich 3 (SFRS3), mRNA;Splicing factor arginine/serine-rich 3;Splicing factor, arginine/serine-rich 3, isoform CRA_d;cDNA FLJ52832, highly similar to Splicing factor, arginine/serine-rich 3;Splicing factor, arginine/serine-rich 3, isoform CRA_a	SFRS3;SRP20;hCG_14802	Splicing factor, arginine/serine-rich 3;Splicing factor, arginine/serine-rich 3, isoform CRA_a	P84103;B2R6F3;B4E241	1	1	2	1	0	0	2	1	2	2	0	0	12.2	19.329	164	63758	409860	373860	153160	0	0
245	IPI00010214	Protein S100-A14;S100 calcium-binding protein A14	S100A14;S100A15	Protein S100-A14	Q9HCY8	0	0	1	1	0	0	1	1	1	1	0	0	10.6	11.662	104	14887	23023	33055	88150	0	0
246	IPI00010257	Alpha-hemoglobin-stabilizing protein;Erythroid differentiation-related factor;Erythroid-associated factor;Erythroid associated factor;Erythroid differentiation-related factor EDRF	AHSP;EDRF;ERAF;hCG_1772004	Alpha-hemoglobin-stabilizing protein	Q9NZD4;Q549J4	0	0	0	0	1	0	0	0	0	0	1	0	12.7	11.84	102	0	0	0	0	66728	0
247	IPI00010270;IPI00877663;IPI00879948;IPI00878066;IPI00027952;IPI00012511;IPI00249526;IPI00007189;IPI00790187;IPI00555566;IPI00642590;IPI00877816;IPI00880127	GX;p21-Rac2;Ras-related C3 botulinum toxin substrate 2;Small G protein;Ras-related C3 botulinum toxin substrate 2 (Rho family, small GTP binding protein Rac2);Ras-related C3 botulinum toxin substrate 2 (Rho family, small GTP binding protein Rac2), isoform CRA_c	RAC2;hCG_1811995;RP1-151B14.8-007;RP1-151B14.8-003;RP1-151B14.8-004	Ras-related C3 botulinum toxin substrate 2;Ras-related C3 botulinum toxin substrate 2 (Rho family, small GTP binding protein Rac2), isoform CRA_c;Ras-related C3 botulinum toxin substrate 2;Ras-related C3 botulinum toxin substrate 2	P15153;B1AH80;B1AH78;B1AH77	1	1	2	0	1	0	1	1	1	1	1	1	15.6	21.429	192	234010	49529	783560	75092	53991	49371
248	IPI00219675;IPI00010271;IPI00023138;IPI00394837	Cell migration-inducing gene 5 protein;p21-Rac1;Ras-like protein TC25;Ras-related C3 botulinum toxin substrate 1;cDNA FLJ77333, highly similar to Homo sapiens ras-related C3 botulinum toxin substrate 1 (rho family, small GTP binding protein Rac1) (RAC1), transcript variant Rac1b, mRNA;Ras-related C3 botulinum toxin substrate 1 (Rho family, small GTP binding protein Rac1);Ras-related C3 botulinum …	MIG5;RAC1;TC25;hCG_14926;tcag7.839;RAC3	Isoform B of Ras-related C3 botulinum toxin substrate 1;Isoform A of Ras-related C3 botulinum toxin substrate 1;Ras-related C3 botulinum toxin substrate 3;Ras-related C3 botulinum toxin substrate 1 (Rho family, small GTP binding protein Rac1), isoform CRA_	P63000-2;P63000;A4D2P0;P63000-1;A4D2P1;P60763;A4D2P2	0	2	2	2	3	3	1	1	1	1	2	2	20.9	23.467	211	129940	1164900	2230700	60492	229070	278080
249	IPI00010290;IPI00788848;IPI00398772	Fatty acid-binding protein 1;Fatty acid-binding protein, liver;Liver-type fatty acid-binding protein;FABP1 protein;Fatty acid binding protein 1, liver, isoform CRA_b;Putative uncharacterized protein FABP1	FABP1;FABPL;hCG_32947	FABP1 protein (Fragment);Putative uncharacterized protein FABP1	P07148;Q05CP7;Q6FGL7;A8MW49	0	2	2	4	6	3	1	2	2	2	4	3	55.2	15.092	134	214950	160510	1270300	10172000	5454800	1780500
250	IPI00010402;IPI00746352;IPI00514669	Putative uncharacterized protein;SH3 domain-binding glutamic acid-rich-like protein 3;SH3 domain-binding protein 1;SH3 domain binding glutamic acid-rich protein like 3	P1725;SH3BGRL3;RP11-569G9.2-002	Putative uncharacterized protein;SH3 domain-binding glutamic acid-rich-like protein 3;SH3 domain binding glutamic acid-rich protein like 3	Q86Z22;Q9H299;Q5T123	1	4	3	1	0	0	2	2	2	2	1	0	8	23.838	226	378430	1900100	1525600	727950	1043.7	0
251	IPI00010414	C-terminal LIM domain protein 1;Elfin;LIM domain protein CLP-36;PDZ and LIM domain protein 1	CLIM1;CLP36;PDLIM1	PDZ and LIM domain protein 1	O00151	1	1	1	1	1	2	1	1	1	1	2	2	6.1	36.071	329	338440	213630	428250	577500	14467	37241
252	IPI00010438;IPI00794436;IPI00216231;IPI00795000;IPI00794966;IPI00796942	Synaptosomal-associated protein 23;Vesicle-membrane fusion protein SNAP-23;Synaptosomal-associated protein	SNAP23;hCG_40424	Isoform SNAP-23a of Synaptosomal-associated protein 23;19 kDa protein;Isoform SNAP-23b of Synaptosomal-associated protein 23;14 kDa protein;14 kDa protein;12 kDa protein	O00161-1;O00161;A8K287;O00161-2	0	1	0	0	0	0	0	1	0	0	1	1	4.7	23.354	211	0	110350	0	0	5859.3	25850
253	IPI00010471;IPI00646259;IPI00909658;IPI00908503;IPI00643270	LC64P;L-plastin;Lymphocyte cytosolic protein 1;Plastin-2;cDNA FLJ39956 fis, clone SPLEN2024990, highly similar to Plastin-2;L-plastin variant	LCP1;PLS2	Plastin-2	P13796;B3KUI1;Q53FI1;Q59GX5	1	7	4	3	8	2	2	5	5	4	5	3	18	70.289	627	196130	3158100	1115200	948150	275160	35811
254	IPI00010477;IPI00293267;IPI00163684;IPI00794258;IPI00789269;IPI00908681	Ecalectin;Galectin-9;Tumor antigen HOM-HD-21;Lectin, galactoside-binding, soluble, 9 (Galectin 9), isoform CRA_f;Urate transporter isoform;cDNA FLJ44029 fis, clone TESTI4027557, highly similar to Galectin-9;Lectin, galactoside-binding, soluble, 9;Lectin, galactoside-binding, soluble, 9 (Galectin 9), isoform CRA_a;Urate transporter/channel protein;Galectin 9 short isoform variant;Lectin, galactosi…	LGALS9;hCG_1749919;HUAT	Isoform Long of Galectin-9;Isoform Short of Galectin-9;Lectin, galactoside-binding, soluble, 9 (Galectin 9), isoform CRA_b;cDNA FLJ52505, highly similar to Homo sapiens lectin, galactoside-binding, soluble 9, transcript variant short, mRNA;Putative unchara	O00182-1;O00182;A7VJG6;O00182-2;B3KWW5;Q3B8N1;Q53FQ0;Q8WYQ7;B4DJD7;A8MQU3;B4DWP7	0	0	0	0	1	0	0	0	0	0	1	0	3.9	39.518	355	0	0	0	0	25405	0
255	IPI00010697;IPI00216225;IPI00921401;IPI00216222;IPI00216223;IPI00216224;IPI00216221;IPI00921080	CD49 antigen-like family member F;Integrin alpha-6;Integrin alpha-6 heavy chain;Integrin alpha-6 light chain;VLA-6;Putative uncharacterized protein ITGA6	ITGA6	Isoform Alpha-6X1X2B of Integrin alpha-6;Isoform Alpha-6X1X2A of Integrin alpha-6;Isoform 9 of Integrin alpha-6;Isoform Alpha-6X1B of Integrin alpha-6;Putative uncharacterized protein ITGA6;Isoform Alpha-6X2B of Integrin alpha-6;Isoform Alpha-6X1A of Integ	P23229-1;P23229;P23229-6;P23229-9;P23229-3;P23229-4;C9JK10;P23229-5;P23229-2;P23229-7	0	0	0	1	0	0	0	0	1	1	0	1	2.1	126.63	1130	0	0	34341	121990	0	0
256	IPI00010706;IPI00915302	Glutathione synthase;Glutathione synthetase;cDNA FLJ51785, highly similar to Glutathione synthetase (EC 6.3.2.3);cDNA FLJ50601, highly similar to Glutathione synthetase (EC 6.3.2.3)	GSS	Glutathione synthetase;Glutathione synthetase	P48637;B7Z1C5;B7Z514;Q8TDA8;B6F210	1	0	1	0	4	1	2	2	2	1	2	1	6.8	52.384	474	205760	149530	208000	561010	101460	83616
257	IPI00010720;IPI00940257;IPI00909956	CCT-epsilon;T-complex protein 1 subunit epsilon;cDNA FLJ78433, highly similar to Homo sapiens chaperonin containing TCP1, subunit 5 (epsilon) (CCT5), mRNA;cDNA FLJ50442, highly similar to T-complex protein 1 subunit epsilon;cDNA FLJ51711, highly similar to T-complex protein 1 subunit epsilon;cDNA FLJ58784, highly similar to T-complex protein 1 subunit epsilon;cDNA FLJ54333, highly similar to T-co…	CCT5;CCTE;KIAA0098	T-complex protein 1 subunit epsilon;cDNA FLJ52361, highly similar to T-complex protein 1 subunit epsilon	P48643;A8K2X8;B4DDU6;B4DE30;B4DX08;B4DXI1;B4DZT5;B7ZAR1;Q9BU08;B4DYC8;B4DYD8;Q96GI1;Q9HB74	0	3	1	3	4	3	0	5	4	4	5	5	14.8	59.67	541	0	1542100	163480	515120	79937	23956
258	IPI00010740;IPI00216613	100 kDa DNA-pairing protein;DNA-binding p52/p100 complex, 100 kDa subunit;Polypyrimidine tract-binding protein-associated-splicing factor;Splicing factor, proline- and glutamine-rich;SFPQ protein;Splicing factor proline/glutamine-rich (Polypyrimidine tract binding protein associated)	PSF;SFPQ	Isoform Long of Splicing factor, proline- and glutamine-rich;Isoform Short of Splicing factor, proline- and glutamine-rich	P23246-1;P23246;Q6PIX2;Q86VG2;Q9BSV4;P23246-2	0	1	0	0	2	0	1	1	1	1	1	1	3.8	76.149	707	7779.8	911360	28058	39034	0	3087.4
259	IPI00010779;IPI00910322;IPI00941379;IPI00238725;IPI00853245;IPI00847219	TM30p1;Tropomyosin alpha-4 chain;Tropomyosin-4;cDNA FLJ54184, highly similar to Tropomyosin alpha-4 chain;cDNA FLJ52936, weakly similar to Tropomyosin alpha-4 chain	TPM4	Isoform 1 of Tropomyosin alpha-4 chain;cDNA FLJ52936, weakly similar to Tropomyosin alpha-4 chain	P67936-1;P67936;B4DVY2;B4DTB1	2	6	3	5	2	3	3	3	3	3	3	3	39.5	28.521	248	4536700	8533100	968400	471300	168060	252080
260	IPI00010790;IPI00643384;IPI00903084;IPI00385748;IPI00911034;IPI00909494;IPI00909809;IPI00639967	Biglycan;Bone/cartilage proteoglycan I;PG-S1;cDNA FLJ76911, highly similar to Homo sapiens biglycan (BGN), mRNA;cDNA FLJ55187, highly similar to Biglycan;Biglycan preproprotein variant;cDNA FLJ36740 fis, clone UTERU2013322, highly similar to Biglycan;Putative uncharacterized protein BGN;cDNA FLJ35704 fis, clone SPLEN2020183, highly similar to Biglycan;cDNA FLJ35635 fis, clone SPLEN2011805, highly…	BGN;SLRR1A	Biglycan;Putative uncharacterized protein BGN;cDNA FLJ35704 fis, clone SPLEN2020183, highly similar to Biglycan;cDNA FLJ35635 fis, clone SPLEN2011805, highly similar to BONE/CARTILAGE PROTEOGLYCAN I;cDNA FLJ59360, moderately similar to Biglycan;cDNA FLJ598	P21810;A8K7E0;B4DDQ2;Q53FI4;Q53HU6;A6NLG9;B3KS75;Q8NAB7;B4DNL4;B4DDN7;B4DQD6	0	3	1	2	5	2	2	2	2	2	6	2	20.9	41.654	368	534720	1065100	537430	223140	2704000	3020900
261	IPI00010796;IPI00878551;IPI00879437;IPI00911004	Cellular thyroid hormone-binding protein;p55;Prolyl 4-hydroxylase subunit beta;Protein disulfide-isomerase;cDNA FLJ56766, highly similar to Protein disulfide-isomerase (EC5.3.4.1);cDNA FLJ59361, highly similar to Protein disulfide-isomerase (EC 5.3.4.1);cDNA FLJ38619 fis, clone HEART2007696, highly similar to Protein disulfide-isomerase (EC 5.3.4.1);cDNA FLJ45462 fis, clone BRSTN2011961, highly s…	ERBA2L;P4HB;PDI;PDIA1;PO4DB;hCG_95895	Protein disulfide-isomerase;cDNA FLJ59430, highly similar to Protein disulfide-isomerase	P07237;B2RDQ2;B4DJS0;B4DNL5;B3KTQ9;B4DLN6;B4DUA5;Q96C96	1	7	6	5	10	5	3	10	8	7	12	12	28.1	57.116	508	519160	6183500	2572800	4989800	896460	446520
262	IPI00010800;IPI00844287	Nestin;NES protein	Nbla00170;NES	Nestin;Similar to Nestin	P48681;Q2YDX4;A5PKT9;Q05BW3	0	0	1	0	0	1	0	2	1	1	0	1	1.3	177.44	1621	0	30178	15886	81109	0	42443
263	IPI00010810;IPI00895865;IPI00792673	Electron transfer flavoprotein subunit alpha, mitochondrial;cDNA FLJ76486, highly similar to Homo sapiens electron-transfer-flavoprotein, alpha polypeptide (glutaric aciduria II) (ETFA), nuclear gene encoding mitochondrial protein, mRNA;Electron transfer flavoprotein alpha-subunit;Electron-transfer-flavoprotein, alpha polypeptide;Electron-transfer-flavoprotein, alpha polypeptide (Glutaric aciduri…	ETFA;hCG_39414	Electron transfer flavoprotein subunit alpha, mitochondrial;electron transfer flavoprotein, alpha polypeptide isoform b;24 kDa protein	P13804;Q53XN3;B4DT43	0	0	1	0	1	2	1	2	3	2	2	3	16.5	35.079	333	33788	32504	89446	123810	503730	28732
264	IPI00010845;IPI00908766	Complex I-23kD;NADH dehydrogenase [ubiquinone] iron-sulfur protein 8, mitochondrial;NADH-ubiquinone oxidoreductase 23 kDa subunit;TYKY subunit;NDUFS8 protein;NADH dehydrogenase (Ubiquinone) Fe-S protein 8, 23kDa (NADH-coenzyme Q reductase) variant;cDNA FLJ57061, highly similar to NADH-ubiquinone oxidoreductase 23 kDa subunit, mitochondrial (EC 1.6.5.3)	NDUFS8	NADH dehydrogenase [ubiquinone] iron-sulfur protein 8, mitochondrial;cDNA FLJ57061, highly similar to NADH-ubiquinone oxidoreductase 23 kDa subunit, mitochondrial	O00217;Q08E91;Q53G17;B4DYI3	0	0	0	0	1	0	0	0	0	0	1	1	5.7	23.705	210	0	0	0	0	57426	10645
265	IPI00010860;IPI00953045;IPI00216220;IPI00790097;IPI00791380;IPI00789338	26S proteasome non-ATPase regulatory subunit 9;26S proteasome regulatory subunit p27;Putative uncharacterized protein PSMD9	PSMD9	Isoform p27-L of 26S proteasome non-ATPase regulatory subunit 9;Putative uncharacterized protein PSMD9;Isoform p27-S of 26S proteasome non-ATPase regulatory subunit 9;12 kDa protein;9 kDa protein;7 kDa protein	O00233-1;O00233;C9JR25;O00233-2	0	2	0	0	0	0	0	2	0	1	0	0	9.4	24.653	223	0	36519	0	75844	0	0
266	IPI00010896	Chloride channel ABP;Chloride intracellular channel protein 1;Nuclear chloride ion channel 27;Regulatory nuclear chloride ion channel protein;Chloride intracellular channel 1 variant;cDNA, FLJ94671, Homo sapiens chloride intracellular channel 1 (CLIC1), mRNA;Chloride intracellular channel 1	CLIC1;NCC27;DADB-110M10.1-001;DAMA-236L13.3-001;DAMC-117B11.2-001;DAQB-350E15.4-001;DASS-312M4.8-001;XXbac-BCX88C14.3-001	Chloride intracellular channel protein 1	O00299;Q53FB0;Q5SRT3	1	3	3	1	3	5	2	3	4	2	4	5	27.4	26.922	241	1540100	7204000	3055600	2360100	337510	256240
267	IPI00010949;IPI00759728	H-Lse;Sialate O-acetylesterase;Sialic acid-specific 9-O-acetylesterase	SIAE;YSG2	Isoform 1 of Sialate O-acetylesterase;Isoform 2 of Sialate O-acetylesterase	Q9HAT2-1;Q9HAT2;Q9HAT2-2	0	1	0	0	0	0	0	1	0	0	0	1	2.3	58.314	523	0	86246	0	0	0	43190
268	IPI00010951	450 kDa epidermal antigen;Epiplakin;Putative uncharacterized protein DKFZp434G0719	EPIPL;EPPK1;DKFZp434G0719	epiplakin 1	P58107;C9JH97;Q9NSU9	0	0	0	0	1	0	0	0	0	0	1	0	4.3	555.61	5090	0	0	0	0	37141	0
269	IPI00011107;IPI00953980	ICD-M;IDP;Isocitrate dehydrogenase [NADP], mitochondrial;NADP(+)-specific ICDH;Oxalosuccinate decarboxylase;cDNA FLJ50469, highly similar to Isocitrate dehydrogenase;cDNA, FLJ79287, highly similar to Isocitrate dehydrogenase;cDNA FLJ50654, highly similar to Isocitrate dehydrogenase;Isocitrate dehydrogenase 2 (NADP+), mitochondrial variant;Isocitrate dehydrogenase	IDH2	Isocitrate dehydrogenase [NADP], mitochondrial;Isocitrate dehydrogenase	P48735;B4DFL2;B4DSZ6;Q53GL5;Q13584	3	5	5	5	8	6	5	6	5	5	9	7	26.8	50.909	452	1031900	2024000	1394000	1480100	151820	85994
270	IPI00011126;IPI00889191	26S protease regulatory subunit 4;26S proteasome AAA-ATPase subunit RPT2;Proteasome 26S subunit ATPase 1;cDNA FLJ58247, highly similar to 26S protease regulatory subunit 4;Proteasome 26S ATPase subunit 1 variant;cDNA, FLJ93843, Homo sapiens proteasome (prosome, macropain) 26S subunit, ATPase, 1(PSMC1), mRNA;Proteasome (Prosome, macropain) 26S subunit, ATPase, 1;Proteasome (Prosome, macropain) 26S…	PSMC1;hCG_2029049	26S protease regulatory subunit 4;similar to hCG1644658	P62191;B4DR63;Q53HB3;Q53XL8;Q6NW36	0	1	0	0	0	0	0	1	0	1	0	0	2	49.184	440	0	59560	0	45297	0	0
271	IPI00011200;IPI00642548	D-3-phosphoglycerate dehydrogenase;cDNA FLJ35987 fis, clone TESTI2014269, highly similar to D-3-phosphoglycerate dehydrogenase (EC 1.1.1.95);Phosphoglycerate dehydrogenase;PHGDH protein;3-phosphoglycerate dehydrogenase	PGDH3;PHGDH;RP4-683H9.1-002	D-3-phosphoglycerate dehydrogenase;Phosphoglycerate dehydrogenase	O43175;B3KSC3;Q5SZU1;Q8N5M8;Q96RV5;Q96RV6;Q96RV7;Q96RV8;Q96RV9;Q9UMY2;Q9UMY3	0	0	0	0	1	1	0	0	0	0	1	1	2.1	56.65	533	0	0	0	0	45960	694560
272	IPI00011201;IPI00643577;IPI00640765	Malic enzyme 2;NAD-dependent malic enzyme, mitochondrial;Malic enzyme	ME2;hCG_23687	NAD-dependent malic enzyme, mitochondrial;Malic enzyme;15 kDa protein	P23368;B2R8J2;Q9BWL6	0	0	0	0	2	0	0	0	0	0	2	1	3.1	65.443	584	0	0	0	0	139970	14187
273	IPI00011229;IPI00853455;IPI00852597;IPI00879328;IPI00892793;IPI00658053	Cathepsin D;Cathepsin D heavy chain;Cathepsin D light chain;Putative uncharacterized protein CTSD	CPSD;CTSD	Cathepsin D;Putative uncharacterized protein CTSD;Putative uncharacterized protein CTSD;Putative uncharacterized protein CTSD;Putative uncharacterized protein CTSD	P07339;C9JIH9;C9JH19;C9JC30;C9JTL0	0	4	2	0	3	2	2	4	4	2	3	6	15.3	44.552	412	201600	5229500	1192400	289180	1123500	533810
274	IPI00011253;IPI00939811;IPI00855830;IPI00879848	40S ribosomal protein S3;Ribosomal protein S3 variant;Ribosomal protein S3	OK/SW-cl.26;RPS3	40S ribosomal protein S3;Ribosomal protein S3	P23396;Q53G83;Q9NQS8	1	5	6	4	9	3	5	6	8	6	9	7	46.5	26.688	243	721710	2992600	3898200	4482300	1236800	1517700
275	IPI00011264;IPI00883722;IPI00006543;IPI00843942	Complement factor H-related protein 1;H factor-like protein 1;H36;Complement factor H-related 1;FHR-1; complement Factor H-related protein 1	CFHL;CFHL1;CFHL1P;CFHR1;CFHR1P;FHR1;HFL1;HFL2;RP1-15D12.2-002;H 36-2	Complement factor H-related protein 1;Complement factor H-related 1	Q03591;B1AKG0;Q6LBM9	0	0	0	1	0	1	0	1	0	1	2	1	9.4	37.65	330	0	77369	0	93670	11102	154570
276	IPI00011268;IPI00216044;IPI00514496;IPI00642213;IPI00641351	Autoantigen p542;Heterogeneous nuclear ribonucleoprotein C-like 2;hnRNP associated with lethal yellow protein homolog;RNA-binding protein Raly;cDNA FLJ77422, highly similar to Homo sapiens RNA binding protein, autoantigenic (hnRNP-associated with lethal yellow homolog (mouse)), transcript variant 1, mRNA;RNA binding protein (Autoantigenic, hnRNP-associated with lethal yellow) long isoform variant…	HNRPCL2;P542;RALY;hCG_37136;RP1-64K7.1-005;RP1-64K7.1-007	RNA binding protein, autoantigenic (HnRNP-associated with lethal yellow homolog (Mouse)), isoform CRA_a (Fragment);Isoform 1 of RNA-binding protein Raly;RNA binding protein, autoantigenic;RNA binding protein, autoantigenic	Q9UKM9-1;Q9UKM9;Q53GL6;Q9UKM9-2;A8K4T9;Q5QPM0;Q5QPL9	0	2	3	2	1	1	2	3	3	3	2	2	11.7	32.55	307	116830	791060	423970	248490	140560	67995
277	IPI00011274;IPI00845282;IPI00045498	AU-rich element RNA-binding factor;Heterogeneous nuclear ribonucleoprotein D-like;JKT41-binding protein;Protein laAUF1;cDNA FLJ59198, highly similar to Homo sapiens heterogeneous nuclear ribonucleoprotein D-like (HNRPDL), transcript variant 2, mRNA;cDNA FLJ60148, highly similar to Homo sapiens heterogeneous nuclear ribonucleoprotein D-like (HNRPDL), transcript variant 2, mRNA	HNRPDL;JKTBP	Isoform 1 of Heterogeneous nuclear ribonucleoprotein D-like;Isoform 2 of Heterogeneous nuclear ribonucleoprotein D-like;Isoform 3 of Heterogeneous nuclear ribonucleoprotein D-like	O14979-1;O14979;B4DGN3;B4DTA2;O14979-2;O14979-3	0	0	0	0	1	1	0	0	0	0	2	2	5.7	46.437	420	0	0	0	0	149900	482.36
278	IPI00011285;IPI00910547;IPI00909108	Calcium-activated neutral proteinase 1;Calpain mu-type;Calpain-1 catalytic subunit;Calpain-1 large subunit;Cell proliferation-inducing gene 30 protein;Micromolar-calpain;cDNA, FLJ96627, highly similar to Homo sapiens calpain 1, (mu/I) large subunit (CAPN1), mRNA;Putative uncharacterized protein CAPN1;cDNA FLJ53224, highly similar to Calpain-1 catalytic subunit (EC 3.4.22.52)	CANPL1;CAPN1;PIG30	Calpain-1 catalytic subunit;Putative uncharacterized protein CAPN1	P07384;B2RDI5;A8MSM1;B4DWH5	0	1	0	0	7	2	0	2	1	1	7	3	10.5	81.889	714	0	19889	10044	1199.6	685950	111510
279	IPI00011302	1F5 antigen;20 kDa homologous restriction factor;CD59 glycoprotein;MAC-inhibitory protein;MEM43 antigen;Membrane attack complex inhibition factor;Membrane inhibitor of reactive lysis;Protectin;CD59 antigen, complement regulatory protein, isoform CRA_b;CD59 protein;cDNA, FLJ92039, Homo sapiens CD59 antigen p18-20 (antigen identified by monoclonalantibodies 16.3A5, EJ16, EJ30, EL32 and G344) (CD59)…	CD59;MIC11;MIN1;MIN2;MIN3;MSK21;hCG_2033390	CD59 glycoprotein	P13987;Q6FHM9	1	0	2	2	1	1	1	1	1	1	1	1	6.2	14.177	128	188120	134960	216450	257680	110430	214600
280	IPI00011416;IPI00848328;IPI00908564	Delta(3,5)-Delta(2,4)-dienoyl-CoA isomerase, mitochondrial	ECH1	Delta(3,5)-Delta(2,4)-dienoyl-CoA isomerase, mitochondrial	Q13011	1	2	2	2	4	1	4	6	4	5	4	3	22.9	35.816	328	1049300	76731	394580	1042200	252510	7813.9
281	IPI00383581;IPI00011454;IPI00441414;IPI00747078	Alpha-glucosidase 2;Glucosidase II subunit alpha;Neutral alpha-glucosidase AB;cDNA FLJ54035, highly similar to Neutral alpha-glucosidase AB;cDNA FLJ61290, highly similar to Neutral alpha-glucosidase AB;cDNA FLJ54057, highly similar to Neutral alpha-glucosidase AB;cDNA FLJ59643, highly similar to Neutral alpha-glucosidase AB	G2AN;GANAB;KIAA0088	cDNA FLJ61290, highly similar to Neutral alpha-glucosidase AB;Isoform 2 of Neutral alpha-glucosidase AB;Isoform 3 of Neutral alpha-glucosidase AB	Q14697-1;Q14697;B4DIW2;B4DJ30;B4DSM6;Q14697-2;B4DZ53;Q14697-3	2	6	5	4	4	5	3	7	6	4	7	7	10.4	112.92	995	261560	1579300	987300	1084500	242100	223810
282	IPI00011603;IPI00383659	26S proteasome non-ATPase regulatory subunit 3;26S proteasome regulatory subunit RPN3;26S proteasome regulatory subunit S3;Proteasome subunit p58;cDNA FLJ30049 fis, clone ADRGL1000033, highly similar to 26S proteasome non-ATPase regulatory subunit 3;cDNA FLJ56054, highly similar to 26S proteasome non-ATPase regulatory subunit 3;cDNA FLJ55739, highly similar to 26S proteasome non-ATPase regulatory…	PSMD3	26S proteasome non-ATPase regulatory subunit 3	O43242;B3KNN7;B4DEB0;B4DPM7;B4DT72;B4DV84;Q6IBN0;Q8N9M2;Q96N86	0	1	0	0	1	3	0	1	0	1	2	4	7.9	60.977	534	0	127780	0	78578	8215.8	56797
283	IPI00011604	Glycine cleavage system H protein, mitochondrial;cDNA, FLJ92251, Homo sapiens glycine cleavage system protein H (aminomethyl carrier) (GCSH), mRNA;Glycine cleavage system protein H (Aminomethyl carrier);Glycine cleavage system protein H (Aminomethyl carrier), isoform CRA_a;GCSH protein;Mitochondrial glycine cleavage system H-protein	GCSH;hCG_1980047	Glycine cleavage system H protein, mitochondrial	P23434;Q53XL7;Q6IAT2;Q6QN92	0	0	0	0	1	0	0	0	0	0	1	0	5.8	18.91	173	0	0	0	0	27962	0
284	IPI00218326;IPI00011675;IPI00218325;IPI00027693;IPI00218324;IPI00218327;IPI00917048;IPI00917345;IPI00719187;IPI00916851;IPI00884908	Lysp100b;Nuclear autoantigen Sp-100;Nuclear dot-associated Sp100 protein;Speckled 100 kDa;Putative uncharacterized protein SP100;Nuclear body protein SP140-like protein;cDNA FLJ61544, highly similar to Nuclear autoantigen Sp-100;cDNA FLJ59578, highly similar to Nuclear autoantigen Sp-100;SP100-HMG nuclear autoantigen;Putative uncharacterized protein SP140L	SP100;SP140L	Isoform Sp100-C of Nuclear autoantigen Sp-100;Isoform Sp100-HMG of Nuclear autoantigen Sp-100;Isoform Sp100-B of Nuclear autoantigen Sp-100;SP140 nuclear body protein-like;Isoform Sp100-A of Nuclear autoantigen Sp-100;Isoform SpAlt-C of Nuclear autoantigen	P23497-4;P23497;P23497-1;Q53TD0;P23497-3;Q9H930-1;Q9H930;P23497-2;P23497-5;B4E2B9;Q4ZG64;B4DDX5;B8ZZD8;Q9P0W1;Q9H930-2;C9JI61;C9JBL0;Q9H930-3;C9JTM2	0	0	0	0	1	0	0	0	0	0	1	0	1.2	101.54	885	0	0	0	0	9594.9	0
285	IPI00940113;IPI00011916;IPI00893993;IPI00893242	cDNA, FLJ93510, highly similar to Homo sapiens JTV1 gene (JTV1), mRNA;Aminoacyl tRNA synthase complex-interacting multifunctional protein 2;Multisynthase complex auxiliary component p38;Protein JTV-1;Putative uncharacterized protein AIMP2	AIMP2;JTV1;PRO0992	cDNA, FLJ93510, highly similar to Homo sapiens JTV1 gene (JTV1), mRNA;Aminoacyl tRNA synthetase complex-interacting multifunctional protein 2;28 kDa protein;Putative uncharacterized protein AIMP2	B2R7M3;Q13155;A8MU58	0	0	0	0	0	1	0	0	0	0	1	1	4.1	35.448	320	0	0	0	0	966.67	94597
286	IPI00011937;IPI00647280;IPI00938009;IPI00639945	Antioxidant enzyme AOE372;Peroxiredoxin IV;Peroxiredoxin-4;Thioredoxin peroxidase AO372;Thioredoxin-dependent peroxide reductase A0372;Putative uncharacterized protein PRDX4	PRDX4	Peroxiredoxin-4;Putative uncharacterized protein PRDX4;similar to thioredoxin peroxidase;Putative uncharacterized protein PRDX4	Q13162;A6NJJ0;C9JLQ6	0	0	0	0	2	0	1	0	0	0	1	1	9.6	30.54	271	1009	0	0	0	494970	1893.3
287	IPI00443415;IPI00011957	Colorectal mutant cancer protein;Putative uncharacterized protein DKFZp686J1286;cDNA FLJ61706, highly similar to Colorectal mutant cancer protein	MCC;DKFZp686J1286	Isoform 2 of Colorectal mutant cancer protein;Isoform 1 of Colorectal mutant cancer protein	P23508-2;P23508;Q7Z3E9;P23508-1;B7Z6G0	0	0	0	0	0	1	0	0	0	0	1	1	1	113.31	1019	0	0	0	0	4145.7	25741
288	IPI00012007;IPI00935818	Adenosylhomocysteinase;S-adenosyl-L-homocysteine hydrolase;AHCY protein;cDNA FLJ52743, highly similar to Adenosylhomocysteinase (EC 3.3.1.1);cDNA, FLJ79079, highly similar to Adenosylhomocysteinase (EC 3.3.1.1)	AHCY;SAHH	Adenosylhomocysteinase;adenosylhomocysteinase isoform 2	P23526;B3KUN3;Q1RMG2	1	0	1	4	5	4	3	4	3	3	9	5	22.9	47.716	432	322360	433910	551110	745960	622890	405050
289	IPI00012011;IPI00909841	18 kDa phosphoprotein;Cofilin, non-muscle isoform;Cofilin-1;cDNA FLJ51435, moderately similar to Cofilin-1	CFL;CFL1	Cofilin-1;cDNA FLJ51435, moderately similar to Cofilin-1	P23528;B4E112	2	2	2	3	8	4	2	2	2	1	5	4	34.3	18.502	166	23210000	7194900	15732000	10123000	3138600	1802800
290	IPI00375531;IPI00012048;IPI00791971	Granzyme A-activated DNase;Metastasis inhibition factor nm23;nm23-H1;Nucleoside diphosphate kinase A;Tumor metastatic process-associated protein	NDPKA;NM23;NME1	Isoform 2 of Nucleoside diphosphate kinase A;Isoform 1 of Nucleoside diphosphate kinase A;9 kDa protein	P15531-2;P15531;P15531-1	0	0	0	0	2	0	0	0	0	0	1	1	29.9	19.653	177	0	0	0	0	178080	33235
291	IPI00796337;IPI00216689;IPI00012066;IPI00790627;IPI00791223;IPI00470509;IPI00900327;IPI00788837;IPI00027970;IPI00410587;IPI00550365;IPI00167750;IPI00101278;IPI00410586;IPI00795754;IPI00790019;IPI00789448;IPI00941606	Poly(RC)-binding protein 2 isoform b variant;Poly(RC) binding protein 2;Poly(RC) binding protein 2, isoform CRA_d;Alpha-CP2;Heterogeneous nuclear ribonucleoprotein E2;Poly(rC)-binding protein 2;cDNA FLJ77432, highly similar to Homo sapiens poly(rC) binding protein 2 (PCBP2), transcript variant 2, mRNA;Poly(RC) binding protein 2, isoform CRA_b;PCBP2 protein;Poly(RC) binding protein 2, isoform CRA_…	hCG_2017557;PCBP2;PCBP3	poly(rC) binding protein 2 isoform a;Poly(rC)-binding protein 2;poly(rC) binding protein 2 isoform b;poly(rC) binding protein 2 isoform e;poly(rC) binding protein 2 isoform f;poly(rC) binding protein 2 isoform c;cDNA FLJ58339, highly similar to Poly(rC)-bi	Q59HD4;Q6IPF4;Q15366;A8K7X6;Q32Q82;Q68Y55;B4DLC0;B4DXP5;B4DRD7;P57721-1;P57721;P57721-4;A8MX33;Q5MJP6;P57721-5;P57721-2;C9JH66;P57721-3	0	1	3	1	3	2	0	1	2	1	3	2	18.9	38.651	366	0	881690	403550	825510	225970	97306
292	IPI00941649;IPI00644055;IPI00012074;IPI00856037;IPI00910614;IPI00856038	Heterogeneous nuclear ribonucleoprotein R;cDNA, FLJ93632, highly similar to Homo sapiens heterogeneous nuclear ribonucleoprotein R (HNRPR), mRNA;Putative uncharacterized protein DKFZp686A13234;cDNA FLJ53360, highly similar to Heterogeneous nuclear ribonucleoprotein R;HNRPR protein;Putative uncharacterized protein DKFZp686O0665;cDNA FLJ53358, highly similar to Heterogeneous nuclear ribonucleoprote…	HNRNPR;HNRPR;DKFZp686A13234;DKFZp686O0665;hCG_38907	71 kDa protein;Isoform 2 of Heterogeneous nuclear ribonucleoprotein R;Isoform 1 of Heterogeneous nuclear ribonucleoprotein R;heterogeneous nuclear ribonucleoprotein R isoform 3;heterogeneous nuclear ribonucleoprotein R isoform 4;Heterogeneous nuclear ribon	O43390-2;O43390;O43390-1;B2R7W4;Q6MZS5;B4DMD1;Q0VGD6;Q7Z334;B4DMB1;B4DT28;Q2L7G6	0	0	0	0	0	1	0	0	0	0	1	1	4.6	71.313	637	0	0	0	0	57935	16399
293	IPI00012119;IPI00219400;IPI00219401;IPI00219403;IPI00792461;IPI00873377;IPI00219404	Bone proteoglycan II;Decorin;PG40;PG-S2;cDNA FLJ75936, highly similar to Homo sapiens decorin (DCN), transcript variant A1, mRNA;DCN protein;Decorin, isoform CRA_b;Putative uncharacterized protein DKFZp686J19238	DCN;SLRR1B;DKFZp686J19238;hCG_24110	Isoform A of Decorin	P07585-1;P07585;Q6FH10	3	3	2	4	12	11	3	4	4	3	6	7	26.2	39.746	359	5297200	1207300	391980	15920000	24594000	20452000
294	IPI00012268;IPI00926258;IPI00926410;IPI00796340;IPI00793806;IPI00384420;IPI00925437;IPI00793022	26S proteasome non-ATPase regulatory subunit 2;26S proteasome regulatory subunit RPN1;26S proteasome regulatory subunit S2;26S proteasome subunit p97;Protein 55.11;Tumor necrosis factor type 1 receptor-associated protein 2;cDNA FLJ53357, highly similar to 26S proteasome non-ATPase regulatory subunit 2;cDNA FLJ54077, highly similar to 26S proteasome non-ATPase regulatory subunit 2;Proteasome (Pros…	PSMD2;TRAP2;DKFZp564A2282	26S proteasome non-ATPase regulatory subunit 2;86 kDa protein;cDNA FLJ55045, highly similar to 26S proteasome non-ATPase regulatory subunit 2	Q13200;B4DM22;B4DX07;Q53XQ4;Q59EG8;Q9NSM5;B4DXY1	0	3	0	0	0	1	1	3	2	4	2	3	5	100.2	908	4810.2	548920	20483	23791	59097	42491
295	IPI00012303;IPI00943000;IPI00942368;IPI00954180;IPI00852838;IPI00852768;IPI00853528;IPI00892906;IPI00952665;IPI00030385;IPI00852953;IPI00893579	Selenium binding protein 1;56 kDa selenium-binding protein;Selenium-binding protein 1;cDNA FLJ52715, highly similar to Selenium-binding protein 1;cDNA FLJ61035, highly similar to Selenium-binding protein 1	RP11-126K1.7-006;SELENBP1;SBP;RP11-126K1.7-005;RP11-126K1.7-019	Selenium binding protein 1;Isoform 1 of Selenium-binding protein 1;cDNA FLJ61035, highly similar to Selenium-binding protein 1;Isoform 2 of Selenium-binding protein 1;Selenium binding protein 1;Selenium binding protein 1	A6PVW9;Q13228-1;Q13228;B4DPI7;B4E1F3;Q13228-2;A6PVW8;A6PVX1	0	2	0	2	10	4	0	2	2	2	7	4	17.7	56.865	514	0	408410	184230	1260600	2176800	756040
296	IPI00012315	DR-nm23;nm23-H3;Nucleoside diphosphate kinase 3;Nucleoside diphosphate kinase C;Nucleoside diphosphate kinase	NME3;c371H6.2	Nucleoside diphosphate kinase 3	Q13232;Q9NUF9	0	0	0	0	0	2	0	0	0	0	1	2	16	19.015	169	0	0	0	0	23683	70034
297	IPI00012382	U1 small nuclear ribonucleoprotein A;cDNA, FLJ93681, highly similar to Homo sapiens small nuclear ribonucleoprotein polypeptide A (SNRPA), mRNA	SNRPA	U1 small nuclear ribonucleoprotein A	P09012;B2R802	0	1	2	0	0	0	0	1	1	1	0	0	3.5	31.279	282	0	562310	456250	178300	0	0
298	IPI00012426;IPI00477895	Retinoid-inducible serine carboxypeptidase;Serine carboxypeptidase 1;cDNA FLJ55993, highly similar to Retinoid-inducible serine carboxypeptidase (EC 3.4.16.-);DC39	MSTP034;RISC;SCP1;SCPEP1;UNQ265/PRO302	Isoform 1 of Retinoid-inducible serine carboxypeptidase;Isoform 2 of Retinoid-inducible serine carboxypeptidase	Q9HB40-1;Q9HB40;B4DP22;Q9H2J9;Q9HB40-2	0	1	1	1	0	0	0	1	1	1	0	0	2.4	50.83	452	0	52467	301400	194280	0	0
299	IPI00012442;IPI00442863	ATP-dependent DNA helicase VIII;GAP SH3 domain-binding protein 1;Ras GTPase-activating protein-binding protein 1;cDNA FLJ51772, highly similar to Ras-GTPase-activating protein-binding protein 1 (EC 3.6.1.-);GTPase activating protein (SH3 domain) binding protein 1;Ras-GTPase-activating protein SH3-domain-binding protein variant;cDNA FLJ50206, highly similar to Ras-GTPase-activating protein-binding…	G3BP;G3BP1;DKFZp313K0921;DKFZp686L1159;hCG_39146	Ras GTPase-activating protein-binding protein 1;CDNA FLJ26493 fis, clone KDN06317, highly similar to Ras-GTPase-activating protein binding protein 1	Q13283;B7Z8K4;Q32P45;Q53HH4;Q5HYE9;Q5U0Q1;Q6FI03;Q6ZP53	0	0	1	1	0	0	0	0	1	1	0	0	2.4	52.164	466	0	0	34183	52979	0	0
300	IPI00012451;IPI00791560;IPI00946384	Guanine nucleotide-binding protein subunit beta-4;Transducin beta chain 4;cDNA FLJ77654, highly similar to Homo sapiens guanine nucleotide binding protein (G protein), beta polypeptide 4 (GNB4), mRNA;cDNA FLJ57161, highly similar to Guanine nucleotide-binding protein subunit beta 4	GNB4	Guanine nucleotide-binding protein subunit beta-4;cDNA FLJ57161, highly similar to Guanine nucleotide-binding protein subunit beta 4	Q9HAV0;A8K3F6;B4DLV5	0	0	0	0	0	0	1	0	0	0	0	0	11.5	37.567	340	0	0	0	0	0	0
301	IPI00012490;IPI00217171;IPI00217169;IPI00217170;IPI00217164;IPI00217165;IPI00217166;IPI00217168;IPI00021695;IPI00216528;IPI00216527;IPI00216530;IPI00216526;IPI00216529;IPI00003831;IPI00219258;IPI00219256;IPI00219259;IPI00219257;IPI00219260;IPI00219261;IPI00219262;IPI00009791;IPI00219296;IPI00219293;IPI00219297;IPI00219294;IPI00219295	Matrix-remodeling-associated protein 1;Plasma membrane calcium ATPase isoform 4;Plasma membrane calcium pump isoform 4;Plasma membrane calcium-transporting ATPase 4;PMCA4b;Putative uncharacterized protein DKFZp686M088;ATP2B4 protein;cDNA FLJ78761, highly similar to Homo sapiens ATPase, Ca++ transporting, plasma membrane 4 (ATP2B4), transcript variant 1, mRNA;ATPase, Ca++ transporting, plasma memb…	ATP2B2;ATP2B4;MXRA1;DKFZp686M088;hCG_18445;RP11-397P13.1-002;ATP2B1;PMCA1	Isoform XD of Plasma membrane calcium-transporting ATPase 4;Isoform ZD of Plasma membrane calcium-transporting ATPase 4;Isoform XB of Plasma membrane calcium-transporting ATPase 4;Isoform ZB of Plasma membrane calcium-transporting ATPase 4;Isoform XA of Pl	P23634-1;P23634;P23634-8;P23634-6;A1X4Q1;Q68DH9;Q7Z3S1;P23634-7;P23634-2;A7E2D8;A8K8U3;B1APW5;P23634-3;C9JFW5;P23634-4;A1X4Q2;P23634-5;P20020-1;P20020;P20020-4;P20020-3;Q3L582;P20020-6;A1X4P7;P20020-2;Q59H63;P20020-5;Q58F24	3	0	0	1	4	3	3	1	2	2	5	4	5.3	137.92	1241	685440	101280	95578	152160	352040	401540
302	IPI00794659;IPI00012493;IPI00791265;IPI00791752;IPI00796373;IPI00795078	cDNA FLJ58953, highly similar to 40S ribosomal protein S20;40S ribosomal protein S20	RPS20	ribosomal protein S20 isoform 1;40S ribosomal protein S20;7 kDa protein;7 kDa protein;5 kDa protein;5 kDa protein	B4DW28;P60866;B2R4F4	0	0	0	0	2	0	0	0	0	0	1	1	7.7	16.005	142	0	0	0	0	183380	39768
303	IPI00219825;IPI00744835;IPI00873020;IPI00873201;IPI00012503;IPI00556640	Prosaposin;A1 activator;Cerebroside sulfate activator;Co-beta-glucosidase;Component C;Dispersin;Glucosylceramidase activator;Proactivator polypeptide;Protein A;Protein C;Saposin-A;Saposin-B;Saposin-B-Val;Saposin-C;Saposin-D;Sphingolipid activator protein 1;Sphingolipid activator protein 2;Sulfatide/GM1 activator;cDNA FLJ54596, highly similar to Proactivator polypeptide;cDNA FLJ54136, highly simil…	PSAP;RP11-472K8.1-002;GLBA;SAP1;hCG_1787837;RP11-472K8.1-001	Prosaposin;Isoform Sap-mu-9 of Proactivator polypeptide;Putative uncharacterized protein PSAP;Isoform Sap-mu-6 of Proactivator polypeptide;Isoform Sap-mu-0 of Proactivator polypeptide;PSAP protein	B1AVU8;P07602-3;P07602;B4DEK5;B4DRB7;O75905;Q59EN5;C9J7I6;P07602-2;C9JIZ6;Q53FJ5;P07602-1;Q53Y86;Q5BJH1	0	3	3	1	5	1	1	3	2	2	6	6	10.2	61.692	559	268170	3172200	661160	491490	379340	97667
304	IPI00012535	DnaJ homolog subfamily A member 1;DnaJ protein homolog 2;Heat shock 40 kDa protein 4;Heat shock protein J2;HSDJ;Human DnaJ protein 2;cDNA FLJ52352, highly similar to DnaJ homolog subfamily A member 1;cDNA FLJ76588, highly similar to Homo sapiens DnaJ (Hsp40) homolog, subfamily A, member 1 (DNAJA1), mRNA;DnaJ (Hsp40) homolog, subfamily A, member 1;DnaJ (Hsp40) homolog, subfamily A, member 1, isofo…	DNAJ2;DNAJA1;HDJ2;HSJ2;HSPF4;hCG_30269;RP11-54K16.1-001	DnaJ homolog subfamily A member 1	P31689;B7Z5C0;Q5T7Q0;Q86TL9;Q9NXZ8	0	0	0	0	1	2	0	0	0	0	1	1	3.3	44.868	397	0	0	0	0	8445.8	59946
305	IPI00012585	Beta-hexosaminidase subunit beta;Beta-hexosaminidase subunit beta chain A;Beta-hexosaminidase subunit beta chain B;Beta-N-acetylhexosaminidase subunit beta;Cervical cancer proto-oncogene 7 protein;N-acetyl-beta-glucosaminidase subunit beta;ENC-1AS	HCC7;HEXB	Beta-hexosaminidase subunit beta	P07686;Q5URX0	0	1	0	1	1	1	1	1	2	1	2	2	5.4	63.111	556	44131	238440	60833	209760	33959	44503
306	IPI00012728;IPI00401448;IPI00942534;IPI00401990;IPI00008037;IPI00854706;IPI00411387;IPI00815946	Acyl-CoA synthetase 1;Long-chain acyl-CoA synthetase 1;Long-chain acyl-CoA synthetase 2;Long-chain fatty acid-CoA ligase 2;Long-chain-fatty-acid--CoA ligase 1;Palmitoyl-CoA ligase 1;Palmitoyl-CoA ligase 2;cDNA FLJ76467, highly similar to Homo sapiens acyl-CoA synthetase long-chain family member 1 (ACSL1), mRNA;cDNA FLJ59311, highly similar to Long-chain-fatty-acid--CoA ligase 1 (EC 6.2.1.3);Acyl-…	ACSL1;FACL1;FACL2;LACS;LACS1;LACS2	Isoform 1 of Long-chain-fatty-acid--CoA ligase 1;Isoform 2 of Long-chain-fatty-acid--CoA ligase 1;cDNA FLJ54220, highly similar to Long-chain-fatty-acid--CoA ligase 1	P33121-1;P33121;A8K9T3;B7Z452;P33121-2;Q108N1;B4E0R0;B7Z3Z9	0	1	0	0	0	1	0	1	0	0	1	3	4.2	77.942	698	0	327560	0	0	13713	16656
307	IPI00012750;IPI00903251;IPI00877856	40S ribosomal protein S25	RPS25	40S ribosomal protein S25;14 kDa protein	P62851	1	1	1	1	3	2	1	1	1	1	3	2	22.4	13.742	125	48242	106160	784860	45252	659280	727290
308	IPI00012772;IPI00795138;IPI00792050;IPI00795853;IPI00797230;IPI00879167;IPI00909884	60S ribosomal protein L8	RPL8	60S ribosomal protein L8;26 kDa protein;16 kDa protein;16 kDa protein;32 kDa protein	P62917	0	3	1	1	2	1	3	2	3	2	2	1	9.7	28.024	257	72049	120240	522470	392210	152660	74303
309	IPI00012795;IPI00642205	eIF3 p36;eIF-3-beta;Eukaryotic translation initiation factor 3 subunit 2;Eukaryotic translation initiation factor 3 subunit I;TGF-beta receptor-interacting protein 1;Eukaryotic translation initiation factor 3, subunit 2 beta, 36kDa variant;cDNA FLJ77665, highly similar to Homo sapiens eukaryotic translation initiation factor 3, subunit 2 beta, 36kDa (EIF3S2), mRNA;cDNA FLJ78316, highly similar to…	EIF3I;EIF3S2;TRIP1;hCG_41608;RP4-675E8.1-001	Eukaryotic translation initiation factor 3 subunit I	Q13347;Q53HU7;Q5U0F4;Q9P1D9	0	1	0	1	0	0	0	2	1	1	1	0	11.4	36.501	325	0	0	14904	105460	0	0
310	IPI00012828;IPI00927496;IPI00303933;IPI00926442;IPI00926669;IPI00925964;IPI00796781	3-ketoacyl-CoA thiolase, peroxisomal;Acetyl-CoA acyltransferase;Beta-ketothiolase;Peroxisomal 3-oxoacyl-CoA thiolase;cDNA FLJ55549, highly similar to 3-ketoacyl-CoA thiolase, peroxisomal (EC 2.3.1.16);3-oxoacyl-CoA thiolase;Putative uncharacterized protein ACAA1;ACAA1 protein	ACAA;ACAA1;PTHIO	3-ketoacyl-CoA thiolase, peroxisomal;Putative uncharacterized protein ACAA1;acetyl-Coenzyme A acyltransferase 1 isoform b;Putative uncharacterized protein ACAA1;Protein;Putative uncharacterized protein ACAA1;17 kDa protein	P09110;B4DEN6;Q8NCW8;C9JDE9;Q96CA6;C9J6A6;C9JKE9	0	0	0	0	1	0	0	0	0	0	1	0	2.4	44.292	424	0	0	0	0	8047.4	0
311	IPI00012837;IPI00029722;IPI00028561;IPI00889664;IPI00909299	Conventional kinesin heavy chain;Kinesin-1 heavy chain;Ubiquitous kinesin heavy chain;cDNA FLJ76989, highly similar to Homo sapiens kinesin family member 5B (KIF5B), mRNA;KIF5B protein	KIF5B;KNS;KNS1	Kinesin-1 heavy chain	P33176;A8K048;Q2TA90;Q66K46;Q6P164	0	1	0	1	0	1	1	2	1	1	1	2	3.7	109.68	963	0	145240	0	124360	26847	22439
312	IPI00013068;IPI00796161	eIF-3 p48;Eukaryotic translation initiation factor 3 subunit 6;Eukaryotic translation initiation factor 3 subunit E;Viral integration site protein INT-6 homolog;cDNA, FLJ93685, highly similar to Homo sapiens eukaryotic translation initiation factor 3, subunit 6 48kDa (EIF3S6), mRNA;cDNA FLJ42184 fis, clone THYMU2031994, highly similar to Eukaryotic translation initiation factor 3 subunit 6;Eukary…	EIF3E;EIF3S6;INT6;hCG_2008794	Eukaryotic translation initiation factor 3 subunit E	P60228;B2R806;B3KW56;Q6IAX5	0	2	0	1	1	0	1	3	2	1	2	2	7.9	52.22	445	74739	108040	74816	297980	54892	20335
313	IPI00651776;IPI00013076;IPI00305013;IPI00641007	T-cell activation GTPase-activating protein;T-cell activation Rho GTPase-activating protein;FGFR1 oncogene partner;cDNA FLJ52986, highly similar to FGFR1 oncogene partner	FKSG15;TAGAP;TAGAP1;FGFR1OP;FOP	Isoform 3 of T-cell activation Rho GTPase-activating protein;Isoform 1 of FGFR1 oncogene partner;Isoform 2 of FGFR1 oncogene partner;cDNA FLJ52986, highly similar to FGFR1 oncogene partner	Q8N103-3;Q8N103;O95684-1;O95684;O95684-2;B4DH64	0	0	0	1	0	0	0	0	1	1	0	0	3.1	56.919	522	0	0	90450	124220	0	0
314	IPI00013079;IPI00893443	Elastin microfibril interface-located protein 1;EMILIN-1	EMI;EMILIN1	EMILIN-1	Q9Y6C2	1	2	0	2	9	10	5	7	6	4	10	11	15.6	106.67	1016	1584000	1540900	893990	434620	443240	1808800
315	IPI00013122	Hsp90 chaperone protein kinase-targeting subunit;Hsp90 co-chaperone Cdc37;p50Cdc37;CDC37 protein;MBD5 protein	CDC37;CDC37A;MBD5	Hsp90 co-chaperone Cdc37	Q16543;A1L0W4;Q6FG59	0	2	1	2	4	2	2	3	2	3	5	4	18.3	44.468	378	38464	285810	158660	194340	146620	150090
316	IPI00013146;IPI00793335;IPI00791542;IPI00789525;IPI00945124;IPI00792175	28S ribosomal protein S22, mitochondrial;cDNA FLJ78575;cDNA PSEC0127 fis, clone PLACE1003724, highly similar to Mitochondrial 28S ribosomal protein S22;Mitochondrial ribosomal protein S22 variant;Brain my045 protein	C3orf5;GK002;MRPS22;RPMS22	28S ribosomal protein S22, mitochondrial;41 kDa protein;Mitochondrial ribosomal protein S22 variant;Putative uncharacterized protein MRPS22;Brain my045 protein;Putative uncharacterized protein MRPS22	P82650;A8K9Y7;Q8NBL6;Q59GX8;C9JZT4;Q9H3I1;C9JY34	0	1	0	0	0	0	0	1	0	1	0	0	2.5	41.28	360	0	44448	0	21384	0	0
317	IPI00013163	Myeloid cell nuclear differentiation antigen;cDNA, FLJ93711, highly similar to Homo sapiens myeloid cell nuclear differentiation antigen (MNDA), mRNA;MNDA protein;cDNA FLJ78191, highly similar to Homo sapiens myeloid cell nuclear differentiation antigen, mRNA;Myeloid cell nuclear differentiation antigen, isoform CRA_a	MNDA;hCG_38208;RP11-432E18.11-001	Myeloid cell nuclear differentiation antigen	P41218;B2R829;Q05CU9;Q5VUU6	0	2	0	0	0	0	1	2	1	0	0	1	5.9	45.836	407	61493	169600	73199	0	0	3256.1
318	IPI00793184;IPI00013164;IPI00796622;IPI00795995	Neurofilament 4;Peripherin;cDNA FLJ43599 fis, clone SMINT2017781, highly similar to PERIPHERIN	NEF4;PRPH;PRPH1	Isoform 2 of Peripherin;Isoform 1 of Peripherin	P41219-2;P41219;B3KWQ6;P41219-1	1	1	0	2	12	10	3	3	3	2	12	10	32.3	53.778	471	121280	21420	13469	116340	3681300	1283100
319	IPI00013184;IPI00440719	N-alpha-acetyltransferase 10, NatA catalytic subunit;N-terminal acetyltransferase complex ARD1 subunit homolog A;ARD1 homolog A, N-acetyltransferase (S. cerevisiae), isoform CRA_b;Putative uncharacterized protein NAA10;cDNA FLJ60470, highly similar to N-terminal acetyltransferase complex ARD1 subunit homolog A (EC 2.3.1.88);ARD1 homolog A, N-acetyltransferase (S. cerevisiae), isoform CRA_a;cDNA, …	ARD1;ARD1A;NAA10;TE2;hCG_39228	N-terminal acetyltransferase complex ARD1 subunit homolog A;Putative uncharacterized protein ARD1A	P41227;A6NM98;B4DFG1;B7Z9N2;Q6P4J0	0	0	0	0	0	0	0	1	0	0	0	0	5.1	26.458	235	0	0	0	0	0	0
320	IPI00013219;IPI00921075;IPI00922759	59 kDa serine/threonine-protein kinase;ILK-1;ILK-2;Integrin-linked protein kinase;p59ILK;cDNA FLJ53825, highly similar to Integrin-linked protein kinase 1 (EC 2.7.11.1);cDNA FLJ50979, moderately similar to Integrin-linked protein kinase (EC 2.7.11.1)	ILK;ILK1;ILK2	Integrin-linked protein kinase;Integrin-linked protein kinase family protein;cDNA FLJ50979, moderately similar to Integrin-linked protein kinase	Q13418;B7Z1I0;B7Z418	1	0	0	2	7	5	2	5	1	3	8	7	18.4	51.419	452	1570100	292480	108020	170390	1275800	340590
321	IPI00013296;IPI00397609;IPI00790711;IPI00894147	40S ribosomal protein S18;Ke-3;Ribosomal protein S18;Ribosomal protein S18, isoform CRA_b	D6S218E;RPS18;DADB-159G18.1-001;DAMC-227D19.3-001;DAQB-314F24.10-001;hCG_1640167;XXbac-BCX165D10.12-001;XXbac-BPG185D15.7-001	40S ribosomal protein S18	P62269;Q5SUJ3	0	4	2	3	3	1	2	5	3	2	4	4	32.2	17.718	152	10652	7285600	897370	718900	559820	306310
322	IPI00641788;IPI00013396;IPI00888655;IPI00888771;IPI00644813	U1 small nuclear ribonucleoprotein C;Small nuclear ribonucleoprotein polypeptide C	RP3-375P9.1-002;SNRPC;hCG_16077;RP3-375P9.1-001;RP3-375P9.1-003	Small nuclear ribonucleoprotein polypeptide C;U1 small nuclear ribonucleoprotein C;hypothetical protein LOC100129566;hypothetical protein LOC100129566;Small nuclear ribonucleoprotein polypeptide C	Q53G33;Q5TAL3;P09234;Q5TAL4;Q5TAL2	0	0	1	1	0	0	1	1	1	1	0	0	5	19.687	180	5390	18077	137530	40526	0	0
323	IPI00013415;IPI00478287;IPI00798077;IPI00796554	40S ribosomal protein S7;cDNA, FLJ92055, Homo sapiens ribosomal protein S7 (RPS7), mRNA;Putative uncharacterized protein RPS7;Ribosomal protein S7, isoform CRA_b	RPS7;hCG_1784266	40S ribosomal protein S7;22 kDa protein;19 kDa protein;18 kDa protein	P62081;Q57Z92	0	1	0	0	0	0	1	1	1	0	1	1	4.6	22.127	194	1668.1	1181400	1238.6	0	39759	68909
324	IPI00013452;IPI00909383	Bifunctional aminoacyl-tRNA synthetase;Cell proliferation-inducing gene 32 protein;Glutamate--tRNA ligase;Glutamyl-tRNA synthetase;Proline--tRNA ligase;Prolyl-tRNA synthetase;cDNA FLJ58269, highly similar to Bifunctional aminoacyl-tRNA synthetase;EPRS protein;cDNA FLJ56021, highly similar to Bifunctional aminoacyl-tRNA synthetase[Includes: Glutamyl-tRNA synthetase (EC 6.1.1.17)	EPRS;GLNS;PARS;PIG32;QARS;QPRS	Bifunctional aminoacyl-tRNA synthetase;cDNA FLJ56021, highly similar to Bifunctional aminoacyl-tRNA synthetase[Includes: Glutamyl-tRNA synthetase (Fragment)	P07814;B4DP50;Q3KQZ8;B4DKX5	0	2	0	1	1	1	0	3	1	2	2	2	2.7	170.6	1512	0	274810	307170	254420	113770	38132
325	IPI00013475;IPI00930715;IPI00031370;IPI00641706;IPI00643158;IPI00827736	Tubulin beta-2A chain;TUBB2A protein;cDNA, FLJ93005, highly similar to Homo sapiens tubulin, beta polypeptide (TUBB), mRNA;Tubulin beta-2B chain;TUBB2B protein;cDNA FLJ52378, highly similar to Tubulin beta-7 chain;cDNA FLJ53906, highly similar to Tubulin beta chain;Homo sapiens clone 23678;Putative uncharacterized protein DKFZp566F223	TUBB2;TUBB2A;TUBB2B;DKFZp566F223	Tubulin beta-2A chain;cDNA, FLJ93005, highly similar to Homo sapiens tubulin, beta polypeptide (TUBB), mRNA;Tubulin beta-2B chain;46 kDa protein;43 kDa protein	Q13885;A5D906;A5D907;B2R6L0;Q9BVA1;A1L195;A8K068;B4E052;B7Z4N1;O43209;Q9UGA2	0	0	0	0	0	2	0	0	0	0	0	1	20.4	49.906	445	0	0	0	0	23140	41236
326	IPI00013485;IPI00165486;IPI00940323;IPI00943304;IPI00479366;IPI00798353;IPI00871956;IPI00878297;IPI00479281;IPI00386445;IPI00442381	40S ribosomal protein S2;40S ribosomal protein S4;Protein LLRep3;Similar to 40S ribosomal protein S2;Ribosomal protein S2;RPS2 protein	RPS2;RPS4;LOC392781;tcag7.979;rps2;OK/KNS-cl.6	40S ribosomal protein S2;31 kDa protein;30 kDa protein;31 kDa protein;Putative uncharacterized protein ENSP00000351543 (Fragment);15 kDa protein;Similar to Ribosomal protein S2	P15880;A4D0Y7;O60249;Q3KQT6;Q6IPX5;Q8J014;Q8N5L9;Q8NI62;Q9BSW5;A6NI39	1	2	1	3	3	1	2	2	3	3	4	3	17.7	31.324	293	1191100	4131000	5111700	827390	336300	752680
327	IPI00873899;IPI00013495;IPI00792186	ATP-binding cassette 50;ATP-binding cassette sub-family F member 1;TNF-alpha-stimulated ABC protein;ATP-binding cassette sub-family F (GCN20) member 1;ATP-binding cassette, sub-family F (GCN20), member 1;ATP-binding cassette, sub-family F, member 1 variant;ABC50 protein;ATP-binding cassette, sub-family F (GCN20), member 1, isoform CRA_a;ABCF1 protein;cDNA FLJ56536, highly similar to ATP-binding c…	ABC50;ABCF1;DADB-129D20.7-001;DAMA-178G23.9-001;DAMC-83F13.6-001;DASS-182C6.1-001;DADB-129D20.7-002;DAMA-178G23.9-002;DAMC-83F13.6-002;DASS-182C6.1-002;hCG_26012;DADB-129D20.7-003;DAMA-178G23.9-003;DAMC-83F13.6-003;DAQB-256B5.2-003;DASS-182C6.1-003;XXbac-BCX98J21.1-003;XXbac-BPG249D20.4-003	Isoform 1 of ATP-binding cassette sub-family F member 1;Isoform 2 of ATP-binding cassette sub-family F member 1;cDNA FLJ56536, highly similar to ATP-binding cassette sub-family F member 1	Q8NE71-1;Q8NE71;A2BF75;Q59F96;Q8NE71-2;Q2L6I2;A0PJ72;B4DNU2;Q5STZ8	1	1	0	0	0	1	1	1	1	1	0	1	1.3	95.925	845	457000	2259500	71973	381140	0	787830
328	IPI00027014;IPI00013654;IPI00385809;IPI00514971;IPI00747408	Dynactin complex subunit 22 kDa subunit;Dynactin subunit 3;Dynactin 3 (P22);cDNA FLJ34342 fis, clone FEBRA2009986, moderately similar to Dynactin 3 (p22); dynactin light chain;Dynactin 3 (P22), isoform CRA_a	DCTN22;DCTN3;RP11-296L22.3-007;hCG_20473	Isoform 1 of Dynactin subunit 3;Isoform 2 of Dynactin subunit 3;Dynactin 3 (P22), isoform CRA_a;Isoform 3 of Dynactin subunit 3;12 kDa protein	O75935-1;O75935;O75935-2;Q5T1I6;Q8NB28;O75935-3	1	0	0	0	0	1	1	2	2	1	0	1	9.1	21.119	186	130350	17941	16421	18541	0	64839
329	IPI00418446;IPI00013698;IPI00059685	Acid ceramidase;Acid ceramidase subunit alpha;Acid ceramidase subunit beta;Acylsphingosine deacylase;N-acylsphingosine amidohydrolase;Putative 32 kDa heart protein;N-acylsphingosine amidohydrolase 1;cDNA FLJ77858, highly similar to Homo sapiens N-acylsphingosine amidohydrolase (acid ceramidase) 1 (ASAH1), transcript variant 1, mRNA;N-acylsphingosine amidohydrolase (Acid ceramidase) 1 preproprotei…	ASAH;ASAH1;HSD33;HSD-33	Isoform 2 of Acid ceramidase;Isoform 1 of Acid ceramidase	Q13510-2;Q13510;B1B5Q2;B1B5Q3;B1B5Q8;B1B5S5;B1B5S6;B1B5S7;B1B5S8;Q13510-1;A8K0B6;B1B5P6;B1B5Q0;B1B5Q9;B1B5R8;B1B5T0;B1B5T7;Q53H01	0	1	1	1	4	2	0	1	1	0	1	1	12.2	46.503	411	30582	345350	237960	447890	726890	210350
330	IPI00013808;IPI00845465;IPI00908458;IPI00942539;IPI00908776;IPI00903019	Alpha-actinin-4;F-actin cross-linking protein;Non-muscle alpha-actinin 4;ACTN4 protein;Actinin alpha4 isoform;cDNA FLJ58087, highly similar to Alpha-actinin-4	ACTN4	Alpha-actinin-4;Actinin alpha4 isoform;cDNA FLJ58087, highly similar to Alpha-actinin-4	O43707;Q96BG6;A4K467;B4E337	4	6	5	3	19	14	7	12	6	9	14	10	30.7	104.85	911	3244200	3900200	13720000	1651800	491660	574510
331	IPI00013847;IPI00792890	Complex III subunit 1;Core protein I;Cytochrome b-c1 complex subunit 1, mitochondrial;Ubiquinol-cytochrome-c reductase complex core protein 1;cDNA FLJ51625, highly similar to Ubiquinol-cytochrome-c reductase complex coreprotein I, mitochondrial (EC 1.10.2.2)	UQCRC1	Cytochrome b-c1 complex subunit 1, mitochondrial	P31930;B2R7R8;B4DUL5	0	0	0	2	5	3	1	3	2	3	4	3	13.3	52.645	480	92974	22784	43965	432810	859700	280560
332	IPI00013860;IPI00879284;IPI00915850	3-hydroxyisobutyrate dehydrogenase, mitochondrial;3'-hydroxyisobutyrate dehydrogenase;3-hydroxyisobutyrate dehydrogenase;3-hydroxyisobutyrate dehydrogenase, isoform CRA_a;cDNA, FLJ96784, Homo sapiens 3-hydroxyisobutyrate dehydrogenase (HIBADH), mRNA;NS5ATP1	HIBADH;hCG_39034;NS5ATP1;tcag7.211	3-hydroxyisobutyrate dehydrogenase, mitochondrial;55 kDa protein;Putative uncharacterized protein HIBADH	P31937;Q546Z2;C9JHR2	0	0	0	1	1	1	1	1	1	1	1	1	8.6	35.329	336	52490	6145	12989	235590	0	0
333	IPI00013877;IPI00216492;IPI00216493	Heterogeneous nuclear ribonucleoprotein 2H9;Heterogeneous nuclear ribonucleoprotein H3;Heterogeneous nuclear ribonucleoprotein H3 isoform a variant	HNRNPH3;HNRPH3	Isoform 1 of Heterogeneous nuclear ribonucleoprotein H3;Isoform 2 of Heterogeneous nuclear ribonucleoprotein H3;Isoform 3 of Heterogeneous nuclear ribonucleoprotein H3	P31942-1;P31942;Q53F48;P31942-2;P31942-3	0	0	0	1	1	1	0	2	1	1	1	1	6.1	36.926	346	0	4544.6	49507	240050	9918.3	49444
334	IPI00479191;IPI00013881	Heterogeneous nuclear ribonucleoprotein H;Heterogeneous nuclear ribonucleoprotein H, N-terminally processed;Putative uncharacterized protein DKFZp686A15170	HNRNPH1;HNRPH;HNRPH1;DKFZp686A15170	51 kDa protein;Heterogeneous nuclear ribonucleoprotein H	P31943;Q68DG4	0	1	2	1	1	2	1	2	3	3	1	2	8.3	51.229	472	245790	259560	1480700	274290	66520	99538
335	IPI00013890;IPI00411765	14-3-3 protein sigma;Epithelial cell marker protein 1;Stratifin	HME1;SFN	Isoform 1 of 14-3-3 protein sigma;Isoform 2 of 14-3-3 protein sigma	P31947-1;P31947;P31947-2	2	6	4	4	1	0	2	4	4	4	1	1	18.5	27.774	248	2441200	4063800	6150100	3798500	607330	329080
336	IPI00013894;IPI00479946;IPI00908463	Hsc70/Hsp90-organizing protein;Renal carcinoma antigen NY-REN-11;Stress-induced-phosphoprotein 1;Transformation-sensitive protein IEF SSP 3521;cDNA FLJ76863, highly similar to Homo sapiens stress-induced-phosphoprotein 1 (Hsp70/Hsp90-organizing protein) (STIP1), mRNA;STIP1 protein;cDNA FLJ54451, highly similar to Stress-induced-phosphoprotein 1	STIP1	Stress-induced-phosphoprotein 1;STIP1 protein;cDNA FLJ54451, highly similar to Stress-induced-phosphoprotein 1	P31948;A8K690;Q3ZCU9;B4DM70	0	2	2	2	4	3	3	5	3	3	5	5	15.3	62.639	543	22388	422830	527960	171590	310400	87034
337	IPI00013895	Calgizzarin;Metastatic lymph node gene 70 protein;Protein S100-A11;Protein S100-C;S100 calcium-binding protein A11;cDNA, FLJ92471, highly similar to Homo sapiens S100 calcium binding protein A11 (calgizzarin) (S100A11), mRNA	MLN70;S100A11;S100C	Protein S100-A11	P31949;B2R5H0	2	5	4	1	1	1	3	2	3	3	1	2	23.8	11.74	105	4036900	9157800	4429900	1610100	310670	415070
338	IPI00013917;IPI00157456	40S ribosomal protein S12	RPS12	40S ribosomal protein S12	P25398	1	1	1	0	3	0	1	1	1	1	2	2	20.5	14.515	132	207700	30275	475280	32328	1025300	5734.3
339	IPI00013933;IPI00217182;IPI00872333;IPI00952810;IPI00746877	250/210 kDa paraneoplastic pemphigus antigen;Desmoplakin;cDNA FLJ53584, highly similar to Desmoplakin;cDNA FLJ51487, highly similar to Desmoplakin;cDNA FLJ61543, highly similar to Desmoplakin;DSP variant protein	DSP;DSP variant protein	Isoform DPI of Desmoplakin;Isoform DPII of Desmoplakin	P15924-1;P15924;P15924-2;B4DKX6;B4DWT7;B4E2A0;Q4LE79	0	5	1	6	1	2	2	8	7	9	3	4	3.9	331.77	2871	4346.5	694670	117930	1005200	42524	72154
340	IPI00013937;IPI00004922	Alpha-chymase;Chymase;Mast cell protease I;CMA1 protein;Chymase 1 preproprotein transcript E;Chymase 1 preproprotein transcript I	CMA1;CYH;CYM	Chymase;Chymase	P23946;Q3SY37;Q4FEB3;Q4FEB5;Q9UDH5	0	0	0	0	6	4	0	0	0	0	4	3	23.1	27.324	247	0	0	0	0	2765600	972980
341	IPI00654744;IPI00013946;IPI00789763;IPI00793573;IPI00791822	SYNGR2 protein;Cellugyrin;Synaptogyrin-2	SYNGR2;UNQ352/PRO615	SYNGR2 protein;Synaptogyrin-2;24 kDa protein;15 kDa protein;12 kDa protein	Q3KQZ2;O43760	0	1	0	1	0	0	1	2	1	1	1	1	7.3	30.375	275	2130.6	328730	53738	38214	25706	9799.6
342	IPI00013971;IPI00023505;IPI00646445;IPI00215903	CDw32;Fc-gamma RII-c;Low affinity immunoglobulin gamma Fc region receptor II-c;Fc-gamma RII-a;Low affinity immunoglobulin gamma Fc region receptor II-a	CD32;FCG2;FCGR2C;IGFR2;FCGR2A;FCGR2A1	Isoform IIC1 of Low affinity immunoglobulin gamma Fc region receptor II-c;Isoform 1 of Low affinity immunoglobulin gamma Fc region receptor II-a;Isoform 2 of Low affinity immunoglobulin gamma Fc region receptor II-a;Isoform IIC2 of Low affinity immunoglobu	P31995-1;P31995;P12318-1;P12318;P12318-2;P31995-2	0	1	0	0	0	0	1	1	1	1	0	0	3.1	35.578	323	16287	37427	20156	958250	0	0
343	IPI00853454;IPI00013976;IPI00852733	Laminin B1 chain;Laminin subunit beta-1;Laminin-1 subunit beta;Laminin-10 subunit beta;Laminin-12 subunit beta;Laminin-2 subunit beta;Laminin-6 subunit beta;Laminin-8 subunit beta;LAMB1 protein	LAMB1	200 kDa protein;Laminin subunit beta-1	P07942;Q8TAS6	1	0	0	0	1	2	1	2	0	0	2	3	2.2	200.48	1810	124230	19057	0	0	50052	212140
344	IPI00014053;IPI00376117	Mitochondrial import receptor subunit TOM40 homolog;p38.5;Protein Haymaker;Translocase of outer membrane 40 kDa subunit homolog	C19orf1;PEREC1;TOM40;TOMM40	Isoform 1 of Mitochondrial import receptor subunit TOM40 homolog;Isoform 2 of Mitochondrial import receptor subunit TOM40 homolog	O96008-1;O96008;O96008-2	0	0	2	0	0	0	1	0	1	0	0	0	2.5	37.893	361	13551	0	116110	0	0	0
345	IPI00871851;IPI00014177;IPI00894340;IPI00893645;IPI00893658;IPI00894055;IPI00894199;IPI00893096;IPI00892810;IPI00893902;IPI00894322;IPI00894283;IPI00893477	Neural precursor cell expressed developmentally down-regulated protein 5;Septin-2;Putative uncharacterized protein SEPT2	DIFF6;KIAA0158;NEDD5;SEPT2	Isoform 2 of Septin-2;Isoform 1 of Septin-2;Putative uncharacterized protein SEPT2;Putative uncharacterized protein SEPT2;Putative uncharacterized protein SEPT2;Putative uncharacterized protein SEPT2	Q15019-2;Q15019;Q15019-1;B5MCX3;C9J2Q4;C9JNU4;C9JL64	0	1	0	0	3	1	0	1	0	0	3	1	10.9	45.46	396	0	0	0	0	445270	16813
346	IPI00014186;IPI00219003;IPI00827871;IPI00328754;IPI00941659	Alpha-fetoprotein enhancer-binding protein;AT motif-binding factor;AT-binding transcription factor 1;Zinc finger homeobox protein 3;Zinc finger homeodomain protein 3;ATBT;ZFHX3 protein;Zinc finger homeobox protein 4;Zinc finger homeodomain protein 4;ZFHX4 protein;cDNA FLJ16624 fis, clone TESTI4015442, moderately similar to Mus musculus zinc finger homeodomain 4 (Zfh4-pending);cDNA FLJ16492 fis, c…	ATBF1;ZFHX3;ZFHX4	Isoform A of Zinc finger homeobox protein 3;Isoform B of Zinc finger homeobox protein 3;Isoform 2 of Zinc finger homeobox protein 4;zinc finger homeodomain 4;Isoform 1 of Zinc finger homeobox protein 4	Q15911-1;Q15911;Q6TCJ2;Q15911-2;Q8N2Y6;Q86UP3-2;Q86UP3;Q5U3C1;Q6ZMW8;Q6ZN29;Q86WW5;Q86UP3-1;Q6DK57;Q9H7F3	0	0	0	0	1	1	0	0	0	0	1	1	0.4	404.41	3703	0	0	0	0	0	41369
347	IPI00014218	Translocating chain-associated membrane protein 2	KIAA0057;TRAM2	Translocating chain-associated membrane protein 2	Q15035	0	0	0	0	0	1	0	1	0	0	1	1	2.4	43.327	370	0	34976	0	0	31765	161990
348	IPI00014230;IPI00796075;IPI00796630	Complement component 1 Q subcomponent-binding protein, mitochondrial;GC1q-R protein;Glycoprotein gC1qBP;Hyaluronan-binding protein 1;Mitochondrial matrix protein p32;p33;cDNA FLJ75700, highly similar to Homo sapiens complement component 1, q subcomponent binding protein (C1QBP), nuclear gene encoding mitochondrial protein, mRNA	C1QBP;GC1QBP;HABP1;SF2P32	Complement component 1 Q subcomponent-binding protein, mitochondrial;20 kDa protein;16 kDa protein	Q07021;A8K651	0	0	0	0	1	0	0	0	0	0	1	0	5.3	31.362	282	0	0	0	0	41110	0
349	IPI00014238;IPI00445108;IPI00307092	Lysine--tRNA ligase;Lysyl-tRNA synthetase;cDNA FLJ44621 fis, clone BRACE2016896, highly similar to Lysyl-tRNA synthetase (EC 6.1.1.6)	KARS;KIAA0070	Isoform Cytoplasmic of Lysyl-tRNA synthetase;cDNA FLJ44621 fis, clone BRACE2016896, highly similar to Lysyl-tRNA synthetase;Isoform Mitochondrial of Lysyl-tRNA synthetase	Q15046-1;Q15046;Q6ZTI3;Q15046-2	0	1	0	1	1	0	0	1	1	1	1	1	3.7	68.047	597	0	245650	0	103220	0	21791
350	IPI00375127;IPI00014263	Eukaryotic translation initiation factor 4H;Williams-Beuren syndrome chromosomal region 1 protein;Similar to mKIAA0038 protein;cDNA FLJ60708, highly similar to Eukaryotic translation initiation factor 4H;Putative uncharacterized protein WBSCR1	EIF4H;KIAA0038;WBSCR1;WSCR1;LOC392647;tcag7.1028	Similar to mKIAA0038 protein;Isoform Long of Eukaryotic translation initiation factor 4H	Q15056-2;Q15056;A4D198;B4DMV6;Q75MT8;Q75MU1;Q15056-1;Q75MU2	0	0	0	0	1	0	0	0	0	0	1	1	4.4	32.604	294	0	0	0	0	239050	664.32
351	IPI00014361;IPI00909958;IPI00791788	GDP-4-keto-6-deoxy-D-mannose-3,5-epimerase-4-reductase;GDP-L-fucose synthase;Protein FX;Red cell NADP(H)-binding protein;Short-chain dehydrogenase/reductase family 4E member 1;cDNA FLJ57685, highly similar to GDP-L-fucose synthetase (EC 1.1.1.271);cDNA FLJ39433 fis, clone PROST2004142, highly similar to GDP-L-fucose synthetase (EC 1.1.1.271)	SDR4E1;TSTA3	GDP-L-fucose synthetase;cDNA FLJ57685, highly similar to GDP-L-fucose synthetase;cDNA FLJ39433 fis, clone PROST2004142, highly similar to GDP-L-fucose synthetase	Q13630;B4DZW9;B3KU96	0	1	0	1	1	0	0	1	0	1	1	1	7.2	35.892	321	0	103290	0	128990	0	0
352	IPI00930706;IPI00014398;IPI00647207;IPI00922730;IPI00922769;IPI00922545;IPI00643324;IPI00055606;IPI00029028;IPI00644118;IPI00641404;IPI00645286;IPI00644668;IPI00902610;IPI00639828	cDNA FLJ55259, highly similar to Four and a half LIM domains protein 1;cDNA FLJ55242, highly similar to Four and a half LIM domains protein 1;Four and a half LIM domains 1, isoform CRA_c;Four and a half LIM domains 1 variant;Four and a half LIM domains protein 1;Skeletal muscle LIM-protein 1;cDNA FLJ53665, highly similar to Four and a half LIM domains protein 1;cDNA FLJ16189 fis, clone BRTHA20127…	FHL1;hCG_33097;SLIM1;RP11-535K18.1-007;RP11-535K18.1-003;RP11-535K18.1-008;RP11-535K18.1-012;RP11-535K18.1-006;RP11-535K18.1-011	four and a half LIM domains 1 isoform 3;four and a half LIM domains 1 isoform 5;Isoform 1 of Four and a half LIM domains protein 1;cDNA FLJ53647, highly similar to Four and a half LIM domains protein 1;cDNA FLJ52561, highly similar to Four and a half LIM d	B7Z793;B7Z5T4;Q53FI7;Q13642-1;Q13642;B7Z6U8;Q6IB30;B7Z5T3;B7Z5V0;B7Z4B7;B7Z9A1;Q5JXI8;Q13642-2;Q5JXI2;Q5JXI3;Q5JXH7;Q5JXH8;Q13642-3;Q5JXH9	5	1	0	4	5	1	3	2	1	4	4	3	24.6	34.997	309	11162000	30497	4732	1022600	1113600	8670.7
353	IPI00014439;IPI00902534	Dihydropteridine reductase;HDHPR;Quinoid dihydropteridine reductase;cDNA FLJ55000, highly similar to Dihydropteridine reductase (EC 1.5.1.34);Quinoid dihydropteridine reductase, isoform CRA_c;cDNA FLJ42391 fis, clone 3NB692002806, highly similar to Dihydropteridine reductase (EC 1.5.1.34);Quinoid dihydropteridine reductase, isoform CRA_e	DHPR;QDPR;hCG_39606	Dihydropteridine reductase;Quinoid dihydropteridine reductase, isoform CRA_e	P09417;B7Z415;B3KW71	1	0	0	1	0	1	1	1	1	1	1	1	10.7	25.789	244	93954	148960	34371	382290	0	0
354	IPI00014478;IPI00952951;IPI00216421;IPI00220749;IPI00220755;IPI00220752;IPI00220748;IPI00952855;IPI00411446;IPI00216422;IPI00797503;IPI00220751;IPI00220757;IPI00220750;IPI00220756	Integrin alpha-7;Integrin alpha-7 heavy chain;Integrin alpha-7 light chain;Putative uncharacterized protein ITGA7;Integrin, alpha 7;cDNA FLJ12486 fis, clone NT2RM2000566, highly similar to Integrin alpha-7;ITGA7 variant protein;Integrin, alpha 7, isoform CRA_e;cDNA FLJ58734, highly similar to Integrin alpha-7	ITGA7;UNQ406/PRO768;ITGA7 variant protein;hCG_20745	Isoform Alpha-7X1X2B of Integrin alpha-7;Putative uncharacterized protein ITGA7;Isoform Alpha-7X1X2A of Integrin alpha-7;Isoform Alpha-7X1B of Integrin alpha-7;Isoform Alpha-7X2B of Integrin alpha-7;Putative uncharacterized protein ITGA7;Isoform Alpha-7X1A	Q13683-1;Q13683;C9JMZ6;Q13683-10;Q13683-3;Q86W93;Q13683-7;B3KMS6;Q4LE35;Q13683-6;C9JMD3;Q13683-2;C9JMD4;Q13683-12;Q13683-11;Q13683-5;Q13683-9;B4E3U0;Q13683-4;Q13683-8	0	0	0	0	1	1	0	0	0	0	1	1	2	128.93	1181	0	0	0	0	0	27539
355	IPI00014516;IPI00218694;IPI00925125;IPI00218695;IPI00218696;IPI00333771;IPI00816770;IPI00926274;IPI00807611;IPI00926763;REV__IPI00942213;REV__IPI00163496;REV__IPI00219754;REV__IPI00941375;REV__IPI00795341;REV__IPI00797801;IPI00925322;IPI00926955	Caldesmon;cDNA FLJ76646, highly similar to Homo sapiens caldesmon 1 (CALD1), transcript variant 3, mRNA;cDNA FLJ53193, highly similar to Homo sapiens caldesmon 1 (CALD1), transcript variant 5, mRNA;Caldesmon 1, isoform CRA_b;NAG22 protein;cDNA FLJ59374, highly similar to Homo sapiens caldesmon 1 (CALD1), transcript variant 2, mRNA;cDNA FLJ55017, highly similar to Caldesmon;CALD1 protein;Putative …	CAD;CALD1;CDM;hCG_17453;DKFZp686P03208;DKFZp779D0769	Isoform 1 of Caldesmon;Isoform 2 of Caldesmon;caldesmon 1 isoform 3;Isoform 3 of Caldesmon;cDNA FLJ53193, highly similar to Homo sapiens caldesmon 1 (CALD1), transcript variant 5, mRNA;Isoform 5 of Caldesmon;Putative uncharacterized protein DKFZp779D0769;P	Q05682-1;Q05682;Q05682-2;A8K0X1;Q05682-3;Q05682-4;B7Z6G4;Q9NYG1;Q05682-5;B4DPW5;B4E3I0;Q6P707;Q6PJM5;Q7Z2Y9;Q5HY93;C9J813	9	3	2	6	16	15	9	9	7	11	17	19	26.4	93.249	793	19512000	2588200	304550	1327300	1387400	1884000
356	IPI00844361;IPI00014577;IPI00922175;IPI00921855;IPI00479988;IPI00478787;IPI00922800;IPI00382462	RAB18 long isoform 1;Ras-related protein Rab-18;cDNA FLJ51678, highly similar to Ras-related protein Rab-18;cDNA FLJ53088, highly similar to Ras-related protein Rab-18;RAB18, member RAS oncogene family variant;RAB18, member RAS oncogene family;cDNA FLJ50154, moderately similar to Ras-related protein Rab-18;PNAS-32	RAB18;RP11-148B2.1-003;RP11-148B2.1-005	RAB18 long isoform 1;Ras-related protein Rab-18;cDNA FLJ51678, highly similar to Ras-related protein Rab-18;cDNA FLJ53088, highly similar to Ras-related protein Rab-18;RAB18, member RAS oncogene family;RAB18, member RAS oncogene family;cDNA FLJ50154, moder	Q56UN9;Q9NP72;B7Z4P9;B7Z5V3;Q59EW3;Q5W0J0;Q5W0I9;B7Z333;Q9BZT2	0	0	1	0	1	0	1	1	1	2	1	0	8.9	26.41	235	85965	75121	79562	85264	121430	0
357	IPI00945566;IPI00014587;IPI00790571;IPI00945731;IPI00216393	Clathrin light chain A;cDNA FLJ60566, highly similar to Clathrin light chain A	CLTA	Putative uncharacterized protein CLTA;Isoform Brain of Clathrin light chain A;Isoform 3 of Clathrin light chain A;cDNA FLJ60566, highly similar to Clathrin light chain A;Isoform Non-brain of Clathrin light chain A	C9JXN4;P09496-1;P09496;P09496-3;B4DIN1;P09496-2	0	0	1	0	0	1	1	1	1	0	1	1	3.5	27.818	260	119350	50480	176450	0	47809	29893
358	IPI00014589;IPI00216472	Clathrin light chain B	CLTB	Isoform Brain of Clathrin light chain B;Isoform Non-brain of Clathrin light chain B	P09497-1;P09497;P09497-2	0	0	0	0	1	2	0	1	0	1	1	2	8.3	25.19	229	0	98815	0	56231	113980	43011
359	IPI00014625;IPI00298082;IPI00938121;IPI00922171	Calcium-activated chloride channel family member 1;Calcium-activated chloride channel protein 1;Calcium-activated chloride channel regulator 1;cDNA FLJ39738 fis, clone SMINT2016412, highly similar to Homo sapiens chloride channel, calcium activated, family member 1 (CLCA1), mRNA;cDNA FLJ56608, highly similar to Homo sapiens chloride channel, calcium activated, family member 1 (CLCA1), mRNA	CACC1;CLCA1	Calcium-activated chloride channel regulator 1	A8K7I4;B3KUF3;B4DUZ6	0	1	2	2	11	7	2	1	3	2	11	6	13.8	100.17	914	263140	198300	1267100	1084500	1548100	705870
360	IPI00014808	PAF acetylhydrolase 29 kDa subunit;PAF-AH subunit gamma;Platelet-activating factor acetylhydrolase IB subunit gamma	PAFAH1B3;PAFAHG	Platelet-activating factor acetylhydrolase IB subunit gamma	Q15102	1	1	0	1	0	1	1	1	1	1	0	1	7.4	25.734	231	133150	176020	587350	148680	0	8727.9
361	IPI00014852;IPI00852717;IPI00555832;IPI00553217	Aciculin;Phosphoglucomutase-like protein 5;Phosphoglucomutase-related protein	PGM5;PGMRP	Isoform 1 of Phosphoglucomutase-like protein 5;Isoform 2 of Phosphoglucomutase-like protein 5	Q15124-1;Q15124;Q15124-2	3	1	0	2	15	13	4	3	3	5	12	13	27	62.224	567	2775500	14588	12119	498980	4980200	1845100
362	IPI00014898;IPI00186711;IPI00398778;IPI00398777;IPI00398779;IPI00398775;IPI00420096;IPI00398776;IPI00398002;IPI00887421	Hemidesmosomal protein 1;Plectin-1;HCG1994702;Plectin isoform 1b;Similar to plectin 1, intermediate filament binding protein, 500kD	PLEC1;hCG_1994702	Isoform 1 of Plectin-1;Isoform 2 of Plectin-1;Isoform 6 of Plectin-1;Isoform 5 of Plectin-1;Isoform 4 of Plectin-1;Isoform 9 of Plectin-1;Isoform 8 of Plectin-1;Isoform 7 of Plectin-1;Isoform 3 of Plectin-1	Q15149-1;Q15149;Q15149-2;Q15149-6;Q15149-5;Q8WXV5;Q15149-4;Q15149-9;Q15149-8;Q15149-7;Q96IE3;Q15149-3	16	17	4	13	25	37	26	35	24	27	46	45	17.5	531.78	4684	4589500	6537400	2378000	3570700	1893500	3590800
363	IPI00015018;IPI00878867;IPI00643288	Inorganic pyrophosphatase;Pyrophosphate phospho-hydrolase;Pyrophosphatase (Inorganic) 1	IOPPP;PP;PPA1;RP11-367H5.1-004	Inorganic pyrophosphatase;27 kDa protein;Pyrophosphatase (Inorganic) 1	Q15181;Q5SQT6	0	1	0	1	4	0	0	2	1	2	4	2	18	32.66	289	0	728180	163730	323970	50179	44239
364	IPI00789101;IPI00789698;IPI00015029;IPI00908647;IPI00790462;IPI00910575;IPI00910005	cDNA FLJ40895 fis, clone UTERU2002294, highly similar to Prostaglandin E synthase 3 (EC 5.3.99.3);Prostaglandin E synthase 3 (Cytosolic), isoform CRA_c;Cytosolic prostaglandin E2 synthase;Hsp90 co-chaperone;Progesterone receptor complex p23;Prostaglandin E synthase 3;Telomerase-binding protein p23;cDNA FLJ59942, highly similar to Prostaglandin E synthase 3 (EC 5.3.99.3);cDNA FLJ50819, highly simi…	hCG_2016483;PTGES3;P23;TEBP	Prostaglandin E synthase 3 (Cytosolic), isoform CRA_c;19 kDa protein;Prostaglandin E synthase 3;cDNA FLJ59942, highly similar to Prostaglandin E synthase 3;Prostaglandin E synthase 3 (Cytosolic), isoform CRA_d;cDNA FLJ59888, moderately similar to Prostagla	B3KUY2;Q15185;B4DP11;B4DP21;B4DHP2;B4DDC6	0	1	0	0	1	1	1	1	1	1	1	1	4.8	19.448	165	280030	576710	516360	668110	156210	135610
365	IPI00015148;IPI00796349;IPI00412525;IPI00816182;IPI00942831;IPI00908754;IPI00940725;IPI00032808	GTP-binding protein smg p21B;Ras-related protein Rap-1b;Ras-related protein Rap-1b-like protein;cDNA FLJ51696, highly similar to Ras-related protein Rap-1b;PNAS-140;cDNA FLJ50711, moderately similar to Ras-related protein Rap-1b;cDNA, FLJ79346, highly similar to Ras-related protein Rap-1b;cDNA, FLJ79442, highly similar to Ras-related protein Rap-1b;cDNA FLJ50714, moderately similar to Ras-related…	OK/SW-cl.11;RAP1B	Ras-related protein Rap-1b;18 kDa protein;Ras-related protein Rap-1b-like protein;PNAS-140 (Fragment);cDNA FLJ50711, moderately similar to Ras-related protein Rap-1b;cDNA FLJ50714, moderately similar to Ras-related protein Rap-1b;16 kDa protein	P61224;A6NIZ1;B4DQI8;Q9BXV4;B4DW74;B7ZAY2;B7ZB78;B4DW94	1	1	1	1	3	4	0	0	0	0	2	2	29.3	20.825	184	574090	1117000	254220	737790	1326400	1490400
366	IPI00910593;IPI00015262;IPI00910272;IPI00398735	cDNA FLJ52765, highly similar to Calponin-2;Calponin H2, smooth muscle;Calponin-2;Neutral calponin;cDNA FLJ52469, highly similar to Calponin-2;Calponin 2 isoform a variant;CNN2 protein;Calponin 2;cDNA FLJ52495, highly similar to Calponin-2;cDNA FLJ52701, highly similar to Calponin-2;Calponin 2, isoform CRA_a;cDNA FLJ44427 fis, clone UTERU2007724, highly similar to Homo sapiens calponin 2 (CNN2), …	CNN2;hCG_21577	cDNA FLJ52765, highly similar to Calponin-2;Calponin-2;cDNA FLJ52701, highly similar to Calponin-2;calponin 2 isoform b	B4DUT8;Q99439;A5D8U8;B4DDF4;Q53GK7;Q6FHC3;Q6FHE4;B4DHU5;B4DN57;A6NFI4	0	0	0	0	1	0	0	0	0	0	1	0	3.3	35.943	330	0	0	0	0	49940	0
367	IPI00015361;IPI00030303;IPI00792988;IPI00791925;IPI00028183;IPI00793611	C-Myc-binding protein Mm-1;Myc modulator 1;Prefoldin subunit 5;MM-1 gamma;Prefoldin subunit 5, isoform CRA_c;MM-1 beta	MM1;PFD5;PFDN5;hCG_23361;mm-1	Prefoldin subunit 5;prefoldin subunit 5 isoform gamma;11 kDa protein;10 kDa protein;MM-1 beta;7 kDa protein	Q99471;Q9C083;Q9C084	0	1	0	0	0	1	1	1	0	0	0	1	14.9	17.328	154	63038	0	0	0	0	3534
368	IPI00015504	HHIP-like protein 2	HHIP3;HHIPL2;KIAA1822L;UNQ841/PRO1779	HHIP-like protein 2	Q6UWX4	0	1	0	1	0	1	1	1	1	1	0	1	1.4	80.778	724	28095	1187700	179350	7521300	0	18772
369	IPI00015602;IPI00791887;IPI00793189	Mitochondrial import receptor subunit TOM70;Mitochondrial precursor proteins import receptor;Translocase of outer membrane 70 kDa subunit;cDNA FLJ90621 fis, clone PLACE1002547, highly similar to Mitochondrial proteins import receptor;cDNA FLJ57240, highly similar to Mitochondrial proteins import receptor	KIAA0719;TOMM70A	Mitochondrial import receptor subunit TOM70;25 kDa protein	O94826;B3KQK5;B4DZ87	0	1	1	0	2	0	1	3	1	1	3	1	7.6	67.454	608	37257	38383	164930	116640	26005	99194
370	IPI00927150;IPI00926903;IPI00015833;IPI00926408;IPI00921826;IPI00927721	Putative uncharacterized protein CHCHD3;Coiled-coil-helix-coiled-coil-helix domain-containing protein 3, mitochondrial;Coiled-coil-helix-coiled-coil-helix domain containing 3;Coiled-coil-helix-coiled-coil-helix domain containing 3, isoform CRA_d;cDNA FLJ53726, highly similar to Coiled-coil-helix-coiled-coil-helixdomain-containing protein 3	CHCHD3;hCG_2014841;tcag7.1158	Putative uncharacterized protein CHCHD3;Putative uncharacterized protein CHCHD3;Coiled-coil-helix-coiled-coil-helix domain-containing protein 3, mitochondrial;26 kDa protein;cDNA FLJ53726, highly similar to Coiled-coil-helix-coiled-coil-helixdomain-contain	C9J4B7;C9JRZ6;Q9NX63;A4D1N4;B7Z1X9	0	2	0	2	1	3	1	2	0	2	1	3	20.7	27.735	241	0	180110	0	88046	184750	203010
371	IPI00015842	Reticulocalbin-1;cDNA FLJ55835, highly similar to Reticulocalbin-1;Proliferation-inducing gene 20 protein	RCN;RCN1	Reticulocalbin-1	Q15293;B7Z1M1;Q5J7V8	0	2	0	2	3	0	1	2	2	2	2	3	16	38.89	331	28994	355970	67512	546560	0	0
372	IPI00015856;IPI00658215;IPI00658188;IPI00029820;IPI00072257;IPI00657991;IPI00953251;IPI00658049;IPI00658014	Aspartyl aminopeptidase;cDNA FLJ56420, highly similar to Aspartyl aminopeptidase (EC 3.4.11.21);Putative uncharacterized protein DNPEP;DNPEP protein;cDNA FLJ10915 fis, clone OVARC1000288, weakly similar to VACUOLAR AMINOPEPTIDASE I (EC 3.4.11.22);cDNA FLJ58475, highly similar to Aspartyl aminopeptidase (EC 3.4.11.21);Aspartyl aminopeptidase, isoform CRA_g;cDNA FLJ11809 fis, clone HEMBA1006309, hi…	ASPEP;DAP;DNPEP;hCG_15581	cDNA FLJ56420, highly similar to Aspartyl aminopeptidase;52 kDa protein;48 kDa protein;DNPEP protein (Fragment);cDNA FLJ10915 fis, clone OVARC1000288, weakly similar to VACUOLAR AMINOPEPTIDASE I;Putative uncharacterized protein DNPEP;cDNA FLJ58475, highly	Q9ULA0;B7Z7F0;Q53SB6;Q9BSS9;C9J1E2;Q9NV55;C9JUJ5;B7Z822;Q9HAC6;B9ZVU2	0	0	0	1	2	2	0	1	1	1	3	3	9.9	54.493	493	0	36173	93323	301480	72656	31456
373	IPI00015865	[Protein ADP-ribosylarginine] hydrolase-like protein 2;ADP-ribosylhydrolase 3;Poly(ADP-ribose) glycohydrolase ARH3;cDNA FLJ51852, highly similar to Homo sapiens ADP-ribosylhydrolase like 2 (ADPRHL2), mRNA;ADP-ribosylhydrolase like 2, isoform CRA_a;cDNA, FLJ79248, highly similar to Homo sapiens ADP-ribosylhydrolase like 2 (ADPRHL2), mRNA	ADPRHL2;ARH3;hCG_38289	Poly(ADP-ribose) glycohydrolase ARH3	Q9NX46;B4DHV5;B7ZAN4	0	0	0	1	0	0	1	1	1	1	0	0	4.7	38.946	363	126490	23851	62678	70468	0	0
374	IPI00015872	Tetraspanin-8;Transmembrane 4 superfamily member 3;Tumor-associated antigen CO-029;Transmembrane 4 superfamily member 3 variant	TM4SF3;TSPAN8	Tetraspanin-8	P19075;Q53GA9	0	1	0	1	0	0	0	1	1	1	0	0	4.2	26.044	237	0	61223	80157	908160	0	0
375	IPI00015891	Prefoldin subunit 4;Protein C-1;cDNA, FLJ92340, highly similar to Homo sapiens prefoldin 4 (PFDN4), mRNA	PFD4;PFDN4	Prefoldin subunit 4	Q9NQP4;B2R548	0	0	0	1	0	0	0	1	0	1	1	0	9	15.314	134	0	2569.1	0	71357	4011.7	0
376	IPI00015911;IPI00926319;IPI00909143;IPI00926810;IPI00927039	Dihydrolipoamide dehydrogenase;Dihydrolipoyl dehydrogenase, mitochondrial;Glycine cleavage system L protein;Dihydrolipoyl dehydrogenase;cDNA FLJ50515, highly similar to Dihydrolipoyl dehydrogenase, mitochondrial (EC 1.8.1.4);cDNA FLJ56112, highly similar to Dihydrolipoyl dehydrogenase, mitochondrial (EC 1.8.1.4)	DLD;GCSL;LAD;PHE3	Dihydrolipoyl dehydrogenase, mitochondrial;cDNA FLJ56112, highly similar to Dihydrolipoyl dehydrogenase, mitochondrial;Dihydrolipoyl dehydrogenase	P09622;B2R5X0;B4DFL1;B4DHG0;B4DMK9;B4DT69	1	1	2	1	1	2	2	2	2	2	1	1	11.4	54.177	509	95223	175380	295550	240410	0	0
377	IPI00015953;IPI00477179	DEAD box protein 21;Gu-alpha;Nucleolar RNA helicase 2;Nucleolar RNA helicase Gu;Nucleolar RNA helicase II;RH II/Gu;DDX21 protein;DEAD/H(Asp-Glu-Ala-Asp/His)box polypeptide 21	DDX21;OK/SW-cl.65	Isoform 1 of Nucleolar RNA helicase 2;Isoform 2 of Nucleolar RNA helicase 2	Q9NR30-1;Q9NR30;Q3SWU7;Q8NI92;Q9NR30-2	0	1	0	0	0	0	0	1	0	0	0	0	1.3	87.343	783	0	192780	0	0	0	0
378	IPI00015956;IPI00434985	Exosome complex exonuclease RRP40;Exosome component 3;p10;Ribosomal RNA-processing protein 40;cDNA FLJ75926, highly similar to Homo sapiens exosome component 3 (EXOSC3), transcript variant 1, mRNA;cDNA FLJ75903, highly similar to Homo sapiens exosome component 3 (EXOSC3), transcript variant 2, mRNA;Apoptosis-related protein PNAS-3	CGI-102;EXOSC3;RRP40;hCG_30090;RP11-3J10.8-001;PNAS-3	Exosome complex exonuclease RRP40;exosome component 3 isoform 2	Q9NQT5;Q5QP85;A8K0K6;Q9NYS3	0	0	0	1	0	0	0	1	1	1	0	0	5.5	29.572	275	0	14738	8480.5	112620	0	0
379	IPI00015973;IPI00556351;IPI00788953;IPI00747462;IPI00022133	Band 4.1-like protein 2;Generally expressed protein 4.1;4.1G isoform;Putative uncharacterized protein DKFZp781H1755;cDNA FLJ58484, highly similar to Band 4.1-like protein 2;EPB41L2 protein variant	EPB41L2;DKFZp781H1755	Band 4.1-like protein 2;Putative uncharacterized protein DKFZp781H1755;erythrocyte membrane protein band 4.1-like 2 isoform b	O43491;Q6R5J7;Q68DV2;B4DHI8;Q59FD8	0	2	0	1	4	4	1	3	1	2	5	3	7.7	112.59	1005	162150	151710	89901	51498	231260	281330
380	IPI00893936;IPI00478603;IPI00015988;IPI00893526	HLA-G histocompatibility antigen, class I, G;HLA-G histocompatibility antigen, class I, G, isoform CRA_b;Major histocompatibility complex, class I, G;MHC class Ib antigen;HLA-G protein;MHC class I antigen;HLA class I histocompatibility antigen, alpha chain G;HLA G antigen;HLA-antigen;HLA-G*GJ4;HLA-G*GJ2;HLA G locus protein;HLA-G;Lymphocyte antigen;HLA-G histocompatibility antigen, class I, G, iso…	DAAP-84C21.8-002;HLA-G;DADB-15K14.8-002;DAMA-50J3.12-002;DAMC-101F5.7-002;DAQB-346J13.1-002;DASS-366B6.2-002;hCG_1999524;XXbac-BCX209H21.15-002;XXbac-BPG12I6.3-002;HLA-6.0;HLAG;HLA G locus;DADB-15K14.8-001;DAMA-50J3.12-001;DAMC-101F5.7-001;DAQB-346J13.1-001;DASS-366B6.2-001;XXbac-BCX209H21.15-001;XXbac-BPG12I6.3-001;MHC-G;HLA;DAAP-84C21.8-001	HLA-G histocompatibility antigen, class I, G;HLA-G histocompatibility antigen, class I, G, isoform CRA_b;HLA class I histocompatibility antigen, alpha chain G;MHC class Ib antigen	B0V1N4;Q5RJ85;Q6DU08;Q8MGQ7;Q8MH47;Q8WLS1;Q9MYA2;P17693;A5HSK0;A6YB83;B0L3P8;B0L3P9;B0L3Q0;B1P198;B5LFX8;B5LFY1;B7SFZ2;B7SFZ3;C0JSV2;C0JSV3;C0JT28;C0JT29;C0JT30;C0JTC7;C7SJ32;O02923;O02924;O02925;O02926;O02927;O02928;O02929;O19658;O19659;O19745;O19766;O19767;O19768;O19805;O19806;O19807;O19808;O19809;O78131;O78132;O78133;O78134;Q30182;Q68YR8;Q68YR9;Q68YS0;Q68YS1;Q68YS2;Q68YS3;Q68YS4;Q6B845;Q6B846;…	0	0	0	0	2	1	0	0	0	1	1	1	9.3	38.868	343	0	0	0	4860.1	108910	102590
381	IPI00016179	Protein S100-A13;S100 calcium-binding protein A13	S100A13	Protein S100-A13	Q99584	0	2	0	1	1	2	1	2	0	2	2	3	28.6	11.471	98	3917.1	556990	0	103050	215020	307050
382	IPI00016255	LAMA-like protein 1;Lamina ancestor homolog 1;Phospholipase B domain-containing protein 1;Putative phospholipase B-like 1;cDNA FLJ77100	PLBD1	Putative phospholipase B-like 1	Q6P4A8;A8K4E9	0	1	0	0	0	0	0	1	1	1	0	0	1.8	63.254	553	0	139510	3927.1	9581.5	0	0
383	IPI00016334;IPI00445227	Cell surface glycoprotein MUC18;Cell surface glycoprotein P1H12;Melanoma cell adhesion molecule;Melanoma-associated antigen A32;Melanoma-associated antigen MUC18;S-endo 1 endothelial-associated antigen;cDNA FLJ78619, highly similar to Homo sapiens melanoma cell adhesion molecule (MCAM), mRNA;cDNA, FLJ92775, highly similar to Homo sapiens melanoma cell adhesion molecule (MCAM), mRNA;cDNA FLJ46477 …	MCAM;MUC18	Isoform 1 of Cell surface glycoprotein MUC18	P43121-1;P43121;A8K6A6;B2R642;B3KXZ9	0	0	0	0	1	4	1	1	1	0	2	3	6.7	71.607	646	0	37153	10092	0	145600	339930
384	IPI00016339;IPI00017344;IPI00023510;IPI00927674;IPI00789439;IPI00908835;IPI00924852;IPI00797838;IPI00927292;IPI00927919	L1880;RAB5L;Ras-related protein Rab-5C;Ras-related protein Rab-5B;RAB5B protein;Ras-related protein Rab-5A;cDNA, FLJ93000, Homo sapiens RAB5A, member RAS oncogene family (RAB5A), mRNA;Cervical cancer oncogene 10 protein;RAB5A protein;RAB5A, member RAS oncogene family, isoform CRA_a;cDNA FLJ51867, highly similar to Ras-related protein Rab-5A;cDNA FLJ60627, highly similar to Ras-related protein Rab…	RAB5C;RABL;RAB5B;RAB5;RAB5A;HCC-10;hCG_1776267;hCG_25009	Ras-related protein Rab-5C;Ras-related protein Rab-5B;Ras-related protein Rab-5A;cDNA FLJ51867, highly similar to Ras-related protein Rab-5A;19 kDa protein;RAB5B, member RAS oncogene family, isoform CRA_b;Putative uncharacterized protein RAB5A;Putative unc	P51148;P61020;Q6FI54;P20339;Q6FI44;B4DJA5;B4DKD7;C9JMI9;C9JC42;C9JCW1;C9J2A9	0	1	2	1	1	1	0	1	1	1	2	1	10.6	23.482	216	0	469270	135950	428530	73282	62766
385	IPI00016342;IPI00945574;IPI00945735;IPI00945337;IPI00946776;IPI00945392;IPI00947210;IPI00946911;IPI00792578;IPI00791850;IPI00795370	Ras-related protein Rab-7a;cDNA FLJ55895, highly similar to Ras-related protein Rab-7;Putative uncharacterized protein RAB7A	RAB7;RAB7A	Ras-related protein Rab-7a;Putative uncharacterized protein RAB7A;Putative uncharacterized protein RAB7A;Putative uncharacterized protein RAB7A;Putative uncharacterized protein RAB7A;Putative uncharacterized protein RAB7A;Putative uncharacterized protein R	P51149;B4DPH9;C9J8S3;C9J592;C9J4V0;C9J4S4;C9J7D1;C9JUH2;C9IZZ0	0	1	1	0	4	2	1	2	1	0	4	2	27.5	23.489	207	10345	30384	229650	0	306120	25310
386	IPI00877662;IPI00016373;IPI00941177	Cell growth-inhibiting gene 4 protein;Ras-related protein Rab-13;RAB13 protein	GIG4;RAB13	similar to RAB13, member RAS oncogene family;Ras-related protein Rab-13;Putative uncharacterized protein ENSP00000395798 (Fragment)	P51153;Q504R6;C9JHK4	0	0	0	0	1	0	0	0	0	0	1	0	7.6	36.107	327	0	0	0	0	21837	0
387	IPI00016384	Glycine/arginine-rich protein 1	GRRP1	Glycine/arginine-rich protein 1	Q8TAY7	0	0	0	0	0	1	0	0	0	0	0	1	7	28.71	271	0	0	0	0	0	100010
388	IPI00016513	Ras-related protein Rab-10;Putative uncharacterized protein RAB10;GTP-binding protein RAB10	RAB10	Ras-related protein Rab-10	P61026;Q53SX4;Q53T70;Q9UL28	0	0	1	1	2	1	1	0	1	1	3	3	18.5	22.541	200	15183	0	225950	235880	52246	52597
389	IPI00016610	Alpha-CP1;Heterogeneous nuclear ribonucleoprotein E1;Nucleic acid-binding protein SUB2.3;Poly(rC)-binding protein 1;cDNA, FLJ94964, highly similar to Homo sapiens poly(rC) binding protein 1 (PCBP1), mRNA;Poly(RC) binding protein 1;Putative uncharacterized protein PCBP1	PCBP1;hCG_1776997	Poly(rC)-binding protein 1	Q15365;Q53SS8	1	6	5	4	4	5	1	3	4	3	4	3	26.4	37.497	356	492880	3396900	4149700	1699500	659340	511660
390	IPI00016621;IPI00914938;IPI00914952;IPI00952763;IPI00943035;IPI00166396;IPI00902707;IPI00556111	100 kDa coated vesicle protein C;Adapter-related protein complex 2 alpha-2 subunit;Adaptor protein complex AP-2 subunit alpha-2;Alpha2-adaptin;Alpha-adaptin C;AP-2 complex subunit alpha-2;Clathrin assembly protein complex 2 alpha-C large chain;Huntingtin yeast partner J;Huntingtin-interacting protein 9;Huntingtin-interacting protein J;Plasma membrane adaptor HA2/AP2 adaptin alpha C subunit;cDNA F…	ADTAB;AP2A2;CLAPA2;HIP9;HYPJ;KIAA0899;DKFZp564D1864	Isoform 2 of AP-2 complex subunit alpha-2;Isoform 1 of AP-2 complex subunit alpha-2;Isoform 3 of AP-2 complex subunit alpha-2;Putative uncharacterized protein AP2A2;cDNA FLJ57955, highly similar to Adapter-relatedprotein complex 2 alpha- 2 subunit;cDNA PSE	O94973-2;O94973;O94973-1;B7Z5S9;O94973-3;C9J1S3;B7Z1Q4;Q9UFK5;Q8N2F8;B3KMI7;Q59FN8	0	0	0	0	0	2	0	0	0	0	1	2	4.1	104.09	940	0	0	0	0	98199	74816
391	IPI00909484;IPI00016786;IPI00910473	cDNA FLJ54776, highly similar to Cell division control protein 42 homolog;Cell division control protein 42 homolog;G25K GTP-binding protein;cDNA FLJ55107, highly similar to Cell division control protein 42 homolog;cDNA, FLJ79348, highly similar to Cell division control protein 42 homolog	CDC42	cDNA FLJ54776, highly similar to Cell division control protein 42 homolog;Isoform 2 of Cell division control protein 42 homolog;cDNA FLJ55107, highly similar to Cell division control protein 42 homolog	B4E1U9;P60953-2;P60953;B4DMH5;B7ZAY4	1	1	1	1	1	1	1	1	1	1	1	1	8.9	26.528	236	670360	801000	482030	581780	395740	550580
392	IPI00016801;IPI00027146;IPI00746092	Glutamate dehydrogenase 1, mitochondrial;cDNA FLJ37463 fis, clone BRAWH2011400, highly similar to Glutamate dehydrogenase 1, mitochondrial (EC 1.4.1.3);cDNA FLJ16138 fis, clone BRALZ2017531, highly similar to Glutamate dehydrogenase 1, mitochondrial (EC 1.4.1.3);Glutamate dehydrogenase 1, isoform CRA_a;cDNA FLJ55203, highly similar to Glutamate dehydrogenase 1, mitochondrial (EC 1.4.1.3);cDNA FLJ…	GLUD;GLUD1;hCG_1993805;GLUD2;GLUDP1	Glutamate dehydrogenase 1, mitochondrial;Glutamate dehydrogenase 2, mitochondrial;Glutamate dehydrogenase 1 variant (Fragment)	P00367;B3KT18;B3KV55;B4DGN5;B4DMF5;B4DMG8;B4E0N9;Q14400;Q53GW3;Q9UQV0;P49448;Q9BSD0;Q59FQ4	2	6	1	6	8	3	3	6	5	5	10	7	23.7	61.397	558	241660	1574100	874840	2664200	687970	331910
393	IPI00472442;IPI00871889;IPI00016832;IPI00910408;IPI00910833	30 kDa prosomal protein;Macropain subunit C2;Multicatalytic endopeptidase complex subunit C2;Proteasome component C2;Proteasome nu chain;Proteasome subunit alpha type-1;Proteasome subunit alpha type	HC2;NU;PROS30;PSC2;PSMA1	Isoform Long of Proteasome subunit alpha type-1;Proteasome subunit alpha type;Isoform Short of Proteasome subunit alpha type-1;Proteasome subunit alpha type;proteasome alpha 1 subunit isoform 3	P25786-2;P25786;A8MVJ4;Q53YE8;P25786-1;B4DEV8;B4E0X6	0	3	1	2	0	0	2	4	4	3	0	0	15.6	30.239	269	224270	571270	648870	781450	0	0
394	IPI00016862;IPI00953236;IPI00759575;IPI00953628;IPI00953696;IPI00794573	Glutathione reductase, mitochondrial;Glutathion reductase delta8 alternative splicing variant;Glutathione reductase;Glutathion reductase delta9 alternative splicing varian;Glutathion reductase delta8+9 alternative splicing variant	GLUR;GRD1;GSR	Isoform Mitochondrial of Glutathione reductase, mitochondrial;Glutathion reductase delta8 alternative splicing variant;Isoform Cytoplasmic of Glutathione reductase, mitochondrial;Glutathion reductase delta9 alternative splicing varian;Glutathion reductase	P00390-1;P00390;C8KIL8;P00390-2;Q03504;C8KIL9;C8KIM0	0	0	1	2	3	4	1	2	2	2	5	5	9.8	56.256	522	52553	655570	1027000	492490	463830	204440
395	IPI00646839;IPI00016910;IPI00922360;IPI00910003;IPI00939953;IPI00873286	Putative uncharacterized protein EIF3CL;eIF3 p110;Eukaryotic translation initiation factor 3 subunit 8;Eukaryotic translation initiation factor 3 subunit C;Cell migration-inducing protein 17;cDNA FLJ30804 fis, clone FEBRA2001267, highly similar to Eukaryotic translation initiation factor 3 subunit 8;cDNA FLJ55450, highly similar to Eukaryotic translation initiation factor 3 subunit 8;cDNA FLJ5440…	EIF3CL;EIF3C;EIF3S8	Putative uncharacterized protein EIF3CL;Eukaryotic translation initiation factor 3 subunit C;cDNA FLJ54488, highly similar to Eukaryotic translation initiation factor 3 subunit 8;Putative uncharacterized protein EIF3CL;Putative uncharacterized protein EIF3	B5ME19;Q99613;A1KYQ7;B3KNZ4;B4DVQ5;B4E1D5;B4E2Z6;Q3B7B9;B4DDN4;B4DVU3;C9J1F3;C9JJ55;B4DRU0	0	0	0	0	1	0	0	1	0	0	1	0	1.1	105.47	914	0	2488.9	0	0	26215	0
396	IPI00017184;IPI00657915;IPI00853165	EH domain-containing protein 1;PAST homolog 1;Testilin;cDNA FLJ40523 fis, clone TESTI2046872, highly similar to EH-domain-containing protein 1;cDNA, FLJ92624, highly similar to Homo sapiens EH-domain containing 1 (EHD1), mRNA;EH-domain containing 1, isoform CRA_b;cDNA FLJ53363, highly similar to EH-domain-containing protein 1;cDNA FLJ53643, highly similar to EH-domain-containing protein 1;cDNA FL…	CDABP0131;EHD1;PAST;PAST1;hCG_23386	EH domain-containing protein 1;cDNA FLJ55166, highly similar to EH-domain-containing protein 1;Putative uncharacterized protein EHD1	Q9H4M9;B2R5U3;B4DMV9;B4DR44;B4DTR4;B4DZH9;C9JC03;C9J2Z4	0	0	0	0	1	3	0	0	0	0	2	2	4.5	60.626	534	0	0	0	0	244030	60920
397	IPI00017256;IPI00478433;IPI00847168;IPI00377066	Ras suppressor protein 1;Putative uncharacterized protein RSU1;Ras suppressor protein 1 variant 5;RSU1 protein;cDNA FLJ77304, highly similar to Homo sapiens Ras suppressor protein 1 (RSU1), transcript variant 2, mRNA;Ras suppressor protein 1, isoform CRA_b	RSP1;RSU1;hCG_2017814;RP11-197M22.1-003	Ras suppressor protein 1;Ras suppressor protein 1 variant 5;RSU1 protein (Fragment);ras suppressor protein 1 isoform 2	Q15404;A6NDA7;Q32Q10;A8KA46	0	0	0	0	4	3	0	2	1	0	4	4	14.4	31.54	277	0	36503	1199.5	0	1736600	2114.4
398	IPI00017292;IPI00927799;IPI00219893;IPI00788993;IPI00925083;IPI00792321	Beta-catenin;Catenin beta-1;cDNA FLJ57878, highly similar to Beta-catenin;cDNA FLJ59415, highly similar to Beta-catenin;cDNA FLJ59565, highly similar to Beta-catenin	CTNNB;CTNNB1;OK/SW-cl.35;PRO2286	Isoform 1 of Catenin beta-1;cDNA FLJ57878, highly similar to Beta-catenin;cDNA FLJ59565, highly similar to Beta-catenin	P35222-1;P35222;A8K1L7;B5BU28;B2ZRG2;B4DGU4;B4DSW9;B4DL06	0	2	0	1	2	1	1	4	0	2	0	0	7.8	85.496	781	42800	49797	28161	1652300	115540	14592
399	IPI00789551;IPI00017297	Putative uncharacterized protein MATR3;Matrin-3;cDNA FLJ10526 fis, clone NT2RP2000931, highly similar to Matrin-3;cDNA FLJ55637, highly similar to Matrin-3;cDNA FLJ53172, highly similar to Matrin-3;cDNA, FLJ79319, highly similar to Matrin-3;Putative uncharacterized protein DKFZp686K0542;Putative uncharacterized protein DKFZp686K23100;Clone CDABP0107 mRNA sequence	MATR3;KIAA0723;DKFZp686K0542;DKFZp686K23100	Putative uncharacterized protein MATR3;Matrin-3	A8MXP9;P43243;B3KM87;B4DF66;B4DRS1;B7ZAV5;Q5CZA7;Q68D11;Q9H4N1	0	0	0	0	0	1	0	0	0	0	0	1	1.1	99.966	895	0	0	0	0	0	15650
400	IPI00017334;IPI00793658;IPI00791634;IPI00793442;IPI00909721;IPI00940514;IPI00386679	Prohibitin;cDNA FLJ78511, highly similar to Homo sapiens prohibitin (PHB), mRNA;cDNA, FLJ93035, Homo sapiens prohibitin (PHB), mRNA;Prohibitin, isoform CRA_a;Prohibitin variant;PHB protein;Putative uncharacterized protein PHB	PHB;hCG_29613	Prohibitin;Putative uncharacterized protein PHB;Putative uncharacterized protein PHB;Putative uncharacterized protein PHB	P35232;A8K401;Q53FV0;Q6FHP5;Q6PUJ7;C9JW96;C9JZ20;A8MUL1	0	5	2	2	8	2	1	4	4	4	7	5	30.1	29.804	272	20669	1685200	175200	484130	1012200	95339
401	IPI00017342	Rho-related GTP-binding protein RhoG;ARHG protein;Ras homolog gene family, member G (Rho G);Ras homolog gene family, member G (Rho G), isoform CRA_a	ARHG;RHOG;hCG_16162	Rho-related GTP-binding protein RhoG	P84095;Q6ICQ8	1	1	0	1	2	2	1	3	2	1	2	1	36.1	21.308	191	997010	280770	182680	447450	264260	234140
402	IPI00017375;IPI00642931	Protein transport protein Sec23A;SEC23-related protein A;cDNA FLJ45429 fis, clone BRHIP3039057, highly similar to Protein transport protein Sec23A;cDNA FLJ55960, highly similar to Protein transport protein Sec23A;cDNA FLJ53608, highly similar to Protein transport protein Sec23A;Sec23 homolog B (S. cerevisiae)	SEC23A;RP11-379J5.1-001;SEC23B	Protein transport protein Sec23A;Sec23 homolog B	Q15436;B3KXI2;B4DF60;B4DSQ5;Q5QPE2	0	1	0	0	2	0	1	1	0	0	1	1	3	86.16	765	11306	149230	0	0	59218	17796
403	IPI00017376;IPI00478968	Protein transport protein Sec23B;SEC23-related protein B;cDNA FLJ55697, highly similar to Protein transport protein Sec23B;cDNA FLJ61346, highly similar to Protein transport protein Sec23B;cDNA FLJ54142, highly similar to Protein transport protein Sec23B;Sec23 homolog B (S. cerevisiae)	SEC23B;RP11-379J5.1-008	Protein transport protein Sec23B;Sec23 homolog B	Q15437;B4DJW8;B4DRA5;B4DS04;Q5QPE1	0	1	0	0	0	0	0	1	0	0	1	0	3	86.478	767	0	108400	0	0	2177.4	0
404	IPI00017448;IPI00387084	40S ribosomal protein S21;Ribosomal protein S21;Ribosomal protein S21, isoform CRA_d;RPS21 protein;Ribosomal protein S21, isoform CRA_e	RPS21;hCG_41768;RP5-908M14.8-003	40S ribosomal protein S21;Ribosomal protein S21, isoform CRA_e	P63220;Q6FGH5;Q8WVC2;Q9BYK1	0	2	0	0	1	1	0	1	1	0	1	2	22.9	9.1113	83	0	341870	380700	0	108860	94602
405	IPI00017510	Cytochrome c oxidase polypeptide II;Cytochrome c oxidase subunit 2	COII;COXII;MTCO2;MT-CO2;COX2;CO2	Cytochrome c oxidase subunit 2	P00403;A0S0W7;A0S2P1;A0S3T1;A0SA07;A1Z455;A1Z4V2;A4ZKZ0;A6YW54;A6YWD1;A6YXV0;A6Z3M5;A6Z6E8;A6ZEU4;A6ZF47;A6ZFK3;A6ZHA9;A7LDC6;A7LF11;A7LFA2;B0Z6W4;B1W855;B2CB37;B2WRY8;B2XHF9;B2XHT9;B2XIR3;B2XL43;B2XP28;B2XPS3;B2YKU2;B3DE06;B3GUF3;B5M7M0;C5H6K5;C5H6K6;C5H6K7;C5H6L3;C5H6M3;C5H6M4;C5H6M5;C5H6M7;C5H6M8;C8XWJ6;C8Y3G4;C8Y3Q5;C8YBL1;C9D661;Q06TE6;Q09U41;Q0Z7D8;Q0Z7F1;Q0Z7J0;Q0Z7K3;Q0Z7S0;Q14XI3;Q14XT3;…	0	0	1	1	3	2	1	1	1	1	3	2	14.5	25.565	227	8648	250040	47844	199760	2773300	243520
406	IPI00017526	Protein S100-E;Protein S100-P;S100 calcium-binding protein P;Migration-inducing gene 9 protein	S100E;S100P	Protein S100-P	P25815;Q5J7W2	1	1	0	2	1	0	1	1	0	1	1	1	24.2	10.4	95	71587	571700	0	575400	0	0
407	IPI00017592	LETM1 and EF-hand domain-containing protein 1, mitochondrial;Leucine zipper-EF-hand-containing transmembrane protein 1	LETM1	Isoform 1 of LETM1 and EF-hand domain-containing protein 1, mitochondrial	O95202-1;O95202	0	0	0	1	0	0	0	1	0	1	0	0	1.6	83.353	739	0	32399	0	46478	0	0
408	IPI00017596;IPI00910350;IPI00017597;IPI00553216;IPI00892961	APC-binding protein EB1;End-binding protein 1;Microtubule-associated protein RP/EB family member 1;MAPRE1 protein;cDNA FLJ52068, highly similar to Microtubule-associated protein RP/EB family member 1;EB1 protein family member 3;End-binding protein 3;Microtubule-associated protein RP/EB family member 3;RP3;cDNA, FLJ92661, highly similar to Homo sapiens microtubule-associated protein, RP/EB family,…	MAPRE1;MAPRE3;hCG_23708	Microtubule-associated protein RP/EB family member 1;cDNA FLJ52068, highly similar to Microtubule-associated protein RP/EB family member 1;Isoform 1 of Microtubule-associated protein RP/EB family member 3;Isoform 2 of Microtubule-associated protein RP/EB f	Q15691;A2VCR0;B4DM33;Q9UPY8-1;Q9UPY8;B2R5W6;Q6FHB0;Q9UPY8-2;C9JB30	0	0	0	0	1	1	0	0	0	0	2	2	10.8	29.999	268	0	0	0	0	77911	289540
409	IPI00017601;IPI00947307;IPI00946417;IPI00794184;CON__ENSEMBL:ENSBTAP00000031900;IPI00793626;IPI00946590;IPI00946976;IPI00793108;IPI00947311;IPI00946791	Ceruloplasmin;Ferroxidase;Ceruloplasmin (Ferroxidase);Ceruloplasmin (Ferroxidase), isoform CRA_a;CP protein;cDNA FLJ76826, highly similar to Homo sapiens ceruloplasmin (ferroxidase) (CP), mRNA;cDNA FLJ58075, highly similar to Ceruloplasmin (EC 1.16.3.1);cDNA FLJ37971 fis, clone CTONG2009958, highly similar to CERULOPLASMIN (EC 1.16.3.1)	CP;hCG_1781201	Ceruloplasmin;cDNA FLJ58075, highly similar to Ceruloplasmin;Putative uncharacterized protein CP;cDNA FLJ37971 fis, clone CTONG2009958, highly similar to CERULOPLASMIN	P00450;A5PL27;A8K5A4;Q1L857;B7Z5Q2;Q6NSB2;C9JDZ0;B3KTA8	2	3	1	4	5	7	3	7	4	5	7	7	10.4	122.2	1065	1827500	1806500	1054200	1169900	663620	1897700
410	IPI00017617;IPI00798375	DEAD box protein 5;Probable ATP-dependent RNA helicase DDX5;RNA helicase p68;cDNA FLJ53366, highly similar to Probable ATP-dependent RNA helicase DDX5 (EC 3.6.1.-);ATP-dependent RNA helicase DDX5;Putative uncharacterized protein;Putative uncharacterized protein DKFZp686J01190;cDNA FLJ59339, highly similar to Probable ATP-dependent RNA helicase DDX5 (EC 3.6.1.-);cDNA FLJ59357, highly similar to Pr…	DDX5;G17P1;HELR;HLR1;DKFZp686J01190	Probable ATP-dependent RNA helicase DDX5;cDNA FLJ59357, highly similar to Probable ATP-dependent RNA helicase DDX5	P17844;B4DN41;B5BUE6;Q59E92;Q7Z2V5;B4DLW8;B4DNG2	0	1	2	2	0	0	1	2	2	2	0	0	9.6	69.147	614	32410	249100	116960	147860	0	0
411	IPI00017669;IPI00470489;IPI00794957;IPI00796698;IPI00793699	BRG1-associated factor 57;SWI/SNF-related matrix-associated actin-dependent regulator of chromatin subfamily E member 1;cDNA FLJ55512, highly similar to SWI/SNF-related matrix-associated actin-dependent regulator of chromatin subfamily E member 1;Smarce1 variant 5;cDNA FLJ55202, highly similar to SWI/SNF-related matrix-associatedactin-dependent regulator of chromatin subfamily E member 1;Smarce1 …	BAF57;SMARCE1	Isoform 1 of SWI/SNF-related matrix-associated actin-dependent regulator of chromatin subfamily E member 1;Isoform 2 of SWI/SNF-related matrix-associated actin-dependent regulator of chromatin subfamily E member 1;Putative uncharacterized protein SMARCE1;P	Q969G3-1;Q969G3;B4DFR4;B4DGM3;C0IMW4;Q969G3-2;C0IMW5;C0IMW7;C0IMW8;C9J694;C9JD68;C9J0W3	0	1	0	1	0	0	0	1	0	1	0	0	3.2	46.649	411	0	77443	0	264200	0	0
412	IPI00017672	Inosine phosphorylase;Purine nucleoside phosphorylase;cDNA FLJ25678 fis, clone TST04067, highly similar to PURINE NUCLEOSIDE PHOSPHORYLASE (EC 2.4.2.1);PRO1837	NP;PNP	cDNA FLJ25678 fis, clone TST04067, highly similar to PURINE NUCLEOSIDE PHOSPHORYLASE	P00491;Q8N7G1;Q9P1G4	0	1	0	2	2	0	0	1	1	1	3	1	13.3	32.551	293	0	175600	15146	97028	104220	23652
413	IPI00017704	Coactosin-like protein	CLP;COTL1	Coactosin-like protein	Q14019	0	1	4	1	1	1	0	3	3	3	3	3	16.9	15.945	142	0	1428300	4533700	312580	62009	66917
414	IPI00017726;IPI00336094;IPI00639797	17-beta-hydroxysteroid dehydrogenase 10;3-hydroxy-2-methylbutyryl-CoA dehydrogenase;3-hydroxyacyl-CoA dehydrogenase type II;3-hydroxyacyl-CoA dehydrogenase type-2;Endoplasmic reticulum-associated amyloid beta-peptide-binding protein;Mitochondrial ribonuclease P protein 2;Short-chain type dehydrogenase/reductase XH98G2;Type II HADH;HADH2 protein;Hydroxyacyl-Coenzyme A dehydrogenase, type II, isofo…	ERAB;HADH2;HSD17B10;MRPP2;SCHAD;XH98G2;hCG_19788;RP3-339A18.2-001;RP3-339A18.2-004	Isoform 1 of 3-hydroxyacyl-CoA dehydrogenase type-2;Isoform 2 of 3-hydroxyacyl-CoA dehydrogenase type-2;Hydroxysteroid (17-beta) dehydrogenase 10	Q99714-1;Q99714;Q6IBS9;Q99714-2;Q5H928	0	0	0	1	5	2	0	0	0	1	4	2	30.7	26.923	261	0	0	0	0	514070	667650
415	IPI00017763;IPI00941463;IPI00789437;IPI00798071;IPI00788840	Nucleosome assembly protein 1-like 4;Nucleosome assembly protein 1-like 4b;Putative uncharacterized protein NAP1L4;cDNA, FLJ92975, highly similar to Homo sapiens nucleosome assembly protein 1-like 4 (NAP1L4), mRNA;cDNA FLJ59403, highly similar to Nucleosome assembly protein 1-like 4;cDNA, FLJ79141, highly similar to Nucleosome assembly protein 1-like 4;cDNA, FLJ79223, highly similar to Nucleosome…	NAP1L4;NAP1L4b;NAP2	Putative uncharacterized protein NAP1L4;Nucleosome assembly protein 1-like 4;Putative uncharacterized protein NAP1L4;Putative uncharacterized protein NAP1L4;Putative uncharacterized protein NAP1L4	A8CGI3;A8MZ22;B2R6J4;B4DS05;B7ZAC7;B7ZAK9;B7ZB83;Q99733;C9JZI7;A8MXH2;C9J6D1	0	1	1	0	0	0	1	1	1	1	0	0	2.8	44.078	386	7394.1	16791	20499	13191	0	0
416	IPI00790739;IPI00017855;IPI00909879;IPI00382844	Aconitase 2, mitochondrial;Aconitate hydratase, mitochondrial;Citrate hydro-lyase;cDNA, FLJ95737, highly similar to Homo sapiens aconitase 2, mitochondrial (ACO2), nuclear geneencoding mitochondrial protein, mRNA;cDNA FLJ60429, highly similar to Aconitate hydratase, mitochondrial (EC 4.2.1.3);cDNA FLJ54329, highly similar to Aconitate hydratase, mitochondrial(EC 4.2.1.3);cDNA FLJ52327, highly sim…	ACO2;RP3-347H13.8-002;ACON	Aconitase 2, mitochondrial;Aconitate hydratase, mitochondrial;cDNA FLJ50886, highly similar to Aconitate hydratase, mitochondrial;Aconitase (Fragment)	A2A274;Q99798;B2RBW5;B4DEC3;B4DJW1;B4DLY4;B4DZ08;Q71UF1;B4DW08;O75944	0	3	0	3	10	12	2	6	4	6	13	12	20.2	87.819	805	55371	601870	222190	2894600	738750	450850
417	IPI00017963;IPI00040897;IPI00742239;IPI00930678	Small nuclear ribonucleoprotein Sm D2;snRNP core protein D2	SNRPD1;SNRPD2	Small nuclear ribonucleoprotein Sm D2;hypothetical protein LOC119358;similar to hCG2040270;small nuclear ribonucleoprotein D2 isoform 2	P62316	0	2	1	2	0	1	2	2	2	2	0	2	16.9	13.527	118	28990	1195700	1262600	101990	0	31588
418	IPI00018140;IPI00402182;IPI00402183;IPI00930205;IPI00402184;IPI00402185	Glycine- and tyrosine-rich RNA-binding protein;Heterogeneous nuclear ribonucleoprotein Q;NS1-associated protein 1;Synaptotagmin-binding, cytoplasmic RNA-interacting protein;cDNA, FLJ94136, highly similar to Homo sapiens synaptotagmin binding, cytoplasmic RNA interacting protein (SYNCRIP), mRNA;Synaptotagmin binding, cytoplasmic RNA interacting protein variant;SYNCRIP protein;Synaptotagmin binding…	HNRPQ;NSAP1;SYNCRIP;RP1-3J17.2-003;hCG_401112	Isoform 1 of Heterogeneous nuclear ribonucleoprotein Q;Isoform 2 of Heterogeneous nuclear ribonucleoprotein Q;Isoform 3 of Heterogeneous nuclear ribonucleoprotein Q;synaptotagmin binding, cytoplasmic RNA interacting protein isoform 5;Isoform 4 of Heterogen	O60506-1;O60506;B2R8Z8;O60506-2;O60506-3;Q59GL1;O60506-4;Q05CK9;Q5TCG1;O60506-5;B7Z213;B7Z645	0	1	0	1	3	2	1	1	0	1	1	1	6.6	69.602	623	199930	0	920640	726630	59084	26278
419	IPI00018146;IPI00796727;IPI00651755	14-3-3 protein tau;14-3-3 protein T-cell;14-3-3 protein theta;Protein HS1;cDNA FLJ52118, highly similar to 14-3-3 protein theta;cDNA FLJ51144, highly similar to 14-3-3 protein theta;cDNA, FLJ79057, highly similar to 14-3-3 protein theta;Putative uncharacterized protein YWHAQ	YWHAQ	14-3-3 protein theta;Putative uncharacterized protein YWHAQ	P27348;B4DMT8;B4DY04;Q53S41;Q53RR5	1	4	1	1	5	4	1	5	3	2	4	5	32.7	27.764	245	554770	1381100	283750	550350	521310	512150
420	IPI00018196	Notchless protein homolog 1;Notchless gene homolog variant	HUSSY-07;NLE1	Notchless protein homolog 1	Q9NVX2;Q59GJ8	0	1	0	1	0	0	1	1	0	1	0	0	2.3	53.266	485	29185	16026	0	21524	0	0
421	IPI00018206;IPI00910267;IPI00908623	Aspartate aminotransferase, mitochondrial;Fatty acid-binding protein;Glutamate oxaloacetate transaminase 2;Plasma membrane-associated fatty acid-binding protein;Transaminase A;cDNA FLJ78439, highly similar to Homo sapiens glutamic-oxaloacetic transaminase 2;cDNA FLJ40994 fis, clone UTERU2015640, highly similar to Aspartate aminotransferase, mitochondrial (EC 2.6.1.1);cDNA FLJ55692, highly similar…	GOT2	Aspartate aminotransferase, mitochondrial;Aspartate aminotransferase	P00505;A8K482;B3KUZ8;B4DJA6	0	0	1	1	4	3	1	1	1	1	4	3	17.4	47.475	430	128380	75832	123900	297430	0	0
422	IPI00018219;IPI00940091;IPI00873923;IPI00556324	Kerato-epithelin;RGD-containing collagen-associated protein;Transforming growth factor-beta-induced protein ig-h3;Transforming growth factor, beta-induced, 68kDa variant;Putative uncharacterized protein TGFBI;Transforming growth factor, beta-induced, 68kDa, isoform CRA_a;Transforming growth factor beta	BIGH3;TGFBI;hCG_41400	Transforming growth factor-beta-induced protein ig-h3;60 kDa protein;Transforming growth factor, beta-induced, 68kDa, isoform CRA_a	Q15582;Q53GU8;Q53XM1;B9ZVW9;C7FFS5	2	2	0	1	4	1	3	2	3	3	5	4	11.4	74.68	683	999910	1634100	135980	728440	2866900	198470
423	IPI00903226;IPI00220665;IPI00018246;IPI00220663;IPI00220667;IPI00414612	cDNA FLJ46359 fis, clone TESTI4049786, highly similar to Hexokinase-1 (EC 2.7.1.1);Brain form hexokinase;Hexokinase type I;Hexokinase-1;cDNA FLJ78173, highly similar to Homo sapiens hexokinase 1 (HK1) mRNA;Hexokinase 1;Hexokinase 1 isoform HKI variant;cDNA FLJ56506, highly similar to Hexokinase-1 (EC 2.7.1.1);Hexokinase;cDNA FLJ33948 fis, clone CTONG2018379, highly similar to Hexokinase-1 (EC 2.7…	HK1;RP11-404C6.1-003;HK1-ta;HK1-tb;RP11-404C6.1-016;RP11-404C6.1-004	cDNA FLJ46359 fis, clone TESTI4049786, highly similar to Hexokinase-1;Isoform 3 of Hexokinase-1;Isoform 1 of Hexokinase-1;Isoform 2 of Hexokinase-1;Isoform 4 of Hexokinase-1	B3KXY9;P19367-3;P19367;A8K7J7;B1AR61;P78542;Q59FD4;P19367-1;B4DG62;Q71V75;P19367-2;B1AR63;P19367-4;B1AR62;B3KRA9	0	1	1	1	1	3	0	2	1	1	2	4	5.9	106.25	952	0	118410	408500	223420	381780	307240
424	IPI00913961;IPI00218448;IPI00018278;IPI00249267;IPI00926183;IPI00141938;IPI00398798;IPI00398806;IPI00927887	Histone H2A.Z;H2A.F/Z;Histone H2A.V;Histone H2A	H2AFZ;H2AZ;H2AFV;H2AV;hCG_19242	18 kDa protein;Histone H2A.Z;Histone H2A.V;13 kDa protein;Putative uncharacterized protein H2AFV;H2A histone family, member V isoform 2;H2A histone family, member V isoform 3;H2A histone family, member V isoform 5;Putative uncharacterized protein H2AFV	P0C0S5;Q71UI9;C9J0D1;A6NN01;A6NKY0;A6NFA8;C9J386	1	1	1	1	1	2	1	1	1	1	1	1	10.5	18.414	181	32290	305010	682790	67555	1098900	2228000
425	IPI00640817;IPI00018342;IPI00515036	Adenylate kinase 1 variant;Adenylate kinase 1;Adenylate kinase isoenzyme 1;ATP-AMP transphosphorylase 1;Myokinase;Adenylate kinase 1, isoform CRA_b;AK1 protein;cDNA, FLJ94359, Homo sapiens adenylate kinase 1 (AK1), mRNA	AK1;RP11-203J24.1-009;hCG_2039407;RP11-203J24.1-008;RP11-203J24.1-011	Adenylate kinase 1;Adenylate kinase isoenzyme 1;Adenylate kinase 1	Q53EY8;Q5T9B7;P00568;Q6FGX9;Q5T9B8	0	1	0	0	1	2	0	1	0	0	2	2	10	23.411	210	0	143150	0	0	58369	119780
426	IPI00018352;IPI00657702	Neuron cytoplasmic protein 9.5;PGP 9.5;Ubiquitin carboxyl-terminal hydrolase isozyme L1;Ubiquitin thioesterase L1;cDNA, FLJ96414, highly similar to Homo sapiens ubiquitin carboxyl-terminal esterase L1 (ubiquitin thiolesterase) (UCHL1), mRNA;cDNA FLJ30017 fis, clone 3NB692000484, highly similar to Ubiquitin carboxyl-terminal hydrolase isozymeL1 (EC 3.4.19.12);Putative uncharacterized protein UCHL1…	UCHL1;hCG_33087	Ubiquitin carboxyl-terminal hydrolase isozyme L1;Ubiquitin carboxyl-terminal esterase L1 (Ubiquitin thiolesterase), isoform CRA_a	P09936;B2RD14;A6NKP9	0	0	0	0	2	1	0	0	1	0	2	1	8.1	24.824	223	0	0	2420.2	0	185680	104650
427	IPI00018398	26S protease regulatory subunit 6A;26S proteasome AAA-ATPase subunit RPT5;Proteasome 26S subunit ATPase 3;Proteasome subunit P50;Tat-binding protein 1;cDNA FLJ75299, highly similar to Xenopus laevis proteasome (prosome, macropain) 26S subunit, ATPase 3, mRNA	PSMC3;TBP1	26S protease regulatory subunit 6A	P17980;A8K781	0	0	0	0	0	1	0	0	0	0	0	1	3.2	49.203	439	0	0	0	0	0	25999
428	IPI00894409;IPI00018452;IPI00917016;IPI00852917;IPI00892994;IPI00646121;IPI00644561;IPI00643325;IPI00645712;IPI00643422;IPI00645270;IPI00642976;IPI00647692;IPI00642168;IPI00640313;IPI00917163;IPI00642736	Copine I;HCG38213, isoform CRA_b;Copine-1;Copine I variant	CPNE1;hCG_38213;RP1-309K20.2-005;CPN1;RP1-309K20.2-032;RP1-309K20.2-013;RP1-309K20.2-014;RP1-309K20.2-007;RP1-309K20.2-009;RP1-309K20.2-017;RP1-309K20.2-008;RP1-309K20.2-016;RP1-309K20.2-012;RP1-309K20.2-010;RP1-309K20.2-020;RP1-309K20.2-011	copine I isoform b;Copine-1;59 kDa protein;Copine I;47 kDa protein;Copine I;Copine I;Copine I;Copine I;Copine I;Copine I;Copine I;Copine I;Copine I;Copine I;15 kDa protein;Copine I	B0QZ18;Q99829;Q59EI4;A6PVH9;Q5JX45;Q5JX52;Q5JX44;Q5JX60;Q5JX61;Q5JX59;Q5JX58;Q5JX56;Q5JX55;Q5JX57;Q5JX54	0	0	0	0	1	1	0	1	0	0	1	1	1.7	59.717	542	0	2830.3	0	0	40297	8147.5
429	IPI00018465;IPI00952607;IPI00552072;IPI00952671;IPI00946633	CCT-eta;HIV-1 Nef-interacting protein;T-complex protein 1 subunit eta;Chaperonin containing TCP1, subunit 7 (Eta) variant;CCT7 protein;cDNA FLJ54074, highly similar to T-complex protein 1 subunit eta;Chaperonin containing TCP1, subunit 7 (Eta), isoform CRA_c;cDNA FLJ54832, highly similar to T-complex protein 1 subunit eta;Putative uncharacterized protein CCT7;cDNA FLJ59454, highly similar to T-co…	CCT7;CCTH;NIP7-1;hCG_1997313	T-complex protein 1 subunit eta;chaperonin containing TCP1, subunit 7 isoform d;Putative uncharacterized protein CCT7;chaperonin containing TCP1, subunit 7 isoform c	Q99832;Q53HV2;Q6IBT3;B7Z4T9;A8MWI8;B7Z1C9;B8ZZC9;B7Z4Z7;B7Z7I4	0	3	3	1	3	3	2	4	5	2	6	5	16.2	59.366	543	30567	2147800	1570400	581060	189440	215690
430	IPI00018522;IPI00942520;IPI00382516;IPI00215734;IPI00914913	Interferon receptor 1-bound protein 4;Protein arginine N-methyltransferase 1;cDNA FLJ55610, highly similar to Protein arginine N-methyltransferase 1 (EC 2.1.1.-);PRMT1 protein;Protein arginine methyltransferase 1 isoform 4	HMT2;HRMT1L2;IR1B4;PRMT1	HMT1 hnRNP methyltransferase-like 2 isoform 1;cDNA FLJ55610, highly similar to Protein arginine N-methyltransferase 1;HMT1 hnRNP methyltransferase-like 2 isoform 3;Isoform 2 of Protein arginine N-methyltransferase 1;Isoform 3 of Protein arginine N-methyltr	Q99873-1;Q99873;B4E3C3;C9J957;Q8WUW5;Q99873-2;Q99873-3;Q5U8W9	0	1	0	0	0	0	0	1	0	0	0	1	3.5	42.461	371	0	63163	0	0	0	6869.1
431	IPI00790757;IPI00018671;IPI00796237	Dual specificity protein phosphatase 3;Dual specificity protein phosphatase VHR;Dual specificity phosphatase 3;DUSP3 protein	DUSP3;VHR	23 kDa protein;Dual specificity protein phosphatase 3;DUSP3 protein	P51452;B5BUI8;Q8IYJ9	0	0	0	0	1	2	1	1	0	0	1	2	12.4	23.165	210	28564	4471.5	0	0	185540	25667
432	IPI00645948;IPI00419258;IPI00018755;IPI00903004;IPI00742929;IPI00872915;IPI00644653;IPI00943040;IPI00879051;IPI00886784;IPI00788220;IPI00737736;IPI00022796	High-mobility group box 1;High mobility group protein 1;High mobility group protein B1;Putative high mobility group protein 1-like 10;cDNA FLJ32558 fis, clone SPLEN1000143, highly similar to High mobility group protein B1;cDNA FLJ56337, highly similar to High mobility group protein B1;High-mobility group box 1 variant;Putative high mobility group protein 1-like 1;Putative high mobility group prot…	HMGB1;RP11-550P23.1-002;HMG1;HMG1L10;HMGB1L10;RP11-550P23.1-003;HMG1L1;HMGB1L1	High-mobility group box 1;High mobility group protein B1;High mobility group protein 1-like 10;cDNA FLJ32558 fis, clone SPLEN1000143, highly similar to High mobility group protein B1;Similar to High mobility group protein B1;19 kDa protein;cDNA FLJ56337, h	Q5T7C6;P09429;Q9UGV6;B3KQ05;B7Z965;Q59GW1;Q5T7C4;B2RPK0	0	1	0	0	3	3	0	1	1	1	3	2	14.4	25.814	216	0	77592	62721	18112	1377400	147390
433	IPI00018768;IPI00917623;IPI00916061;IPI00922875	Translin;Translin variant;cDNA FLJ34596 fis, clone KIDNE2009191, highly similar to TRANSLIN;Translin, isoform CRA_b;cDNA FLJ59957, highly similar to Translin;cDNA FLJ55086, highly similar to Translin	TSN;hCG_37642	Translin;cDNA FLJ59957, highly similar to Translin;Putative uncharacterized protein TSN;cDNA FLJ55086, highly similar to Translin	Q15631;Q53GR3;B3KRM8;B7Z5D9;C9JZK6;B7Z3X8	1	0	0	3	0	0	2	1	1	2	0	0	8.3	26.183	228	63353	180990	58608	324200	0	0
434	IPI00018783;IPI00375446	Inosine triphosphate pyrophosphatase;Putative oncogene protein hlc14-06-p;Inosine triphosphate pyrophosphatase transcript variant II;ITPase	C20orf37;ITPA;My049;OK/SW-cl.9	Inosine triphosphate pyrophosphatase;inosine triphosphatase isoform b	Q9BY32;B2BCH7;Q5NT82	0	0	0	0	1	0	0	0	0	0	1	1	8.8	21.445	194	0	0	0	0	26766	708.34
435	IPI00018873;IPI00337370;IPI00922378	Nicotinamide phosphoribosyltransferase;Pre-B-cell colony-enhancing factor 1;Visfatin;cDNA FLJ55038, highly similar to Nicotinamide phosphoribosyltransferase (EC 2.4.2.12)	NAMPT;PBEF;PBEF1	Nicotinamide phosphoribosyltransferase;42 kDa protein;cDNA FLJ55038, highly similar to Nicotinamide phosphoribosyltransferase	P43490;B7Z8W6	0	0	0	0	1	1	0	0	0	0	1	1	2.4	55.52	491	0	0	0	0	32699	39305
436	IPI00018931;IPI00943562	Maternal-embryonic 3;Vacuolar protein sorting-associated protein 35;Vesicle protein sorting 35;Vacuolar protein sorting 35 variant;Putative uncharacterized protein DKFZp686O2462	MEM3;TCCCTA00141;VPS35;DKFZp686O2462	Vacuolar protein sorting-associated protein 35;similar to vacuolar protein sorting 35	Q96QK1;Q53FR4;Q5HYM2	0	1	1	0	0	0	1	1	2	1	0	0	2.5	91.706	796	37726	23389	471400	53910	0	0
437	IPI00018963;IPI00922277;IPI00386908	Actopaxin;Alpha-parvin;Calponin-like integrin-linked kinase-binding protein;CH-ILKBP;Matrix-remodeling-associated protein 2;cDNA FLJ54827, highly similar to Alpha-parvin	MXRA2;PARVA	Isoform 1 of Alpha-parvin;cDNA FLJ54827, highly similar to Alpha-parvin	Q9NVD7-1;Q9NVD7;B7Z952	0	0	0	1	4	3	2	2	0	2	4	3	14.5	42.243	372	644080	739740	0	309080	144620	39263
438	IPI00019038	1,4-beta-N-acetylmuramidase C;Lysozyme C	LYZ;LZM;hCG_24462	Lysozyme C	P61626;B2R4C5	2	1	2	0	0	0	2	2	2	2	1	1	11.5	16.537	148	262600	1212100	186790	5684.3	26054	3603
439	IPI00019157	Chondroitin sulfate proteoglycan 4;Chondroitin sulfate proteoglycan NG2;Melanoma chondroitin sulfate proteoglycan;Melanoma-associated chondroitin sulfate proteoglycan;CSPG4 protein	CSPG4;MCSP	Chondroitin sulfate proteoglycan 4	Q6UVK1;A2VCL1	0	0	0	0	0	1	0	0	0	1	1	1	0.6	250.49	2322	0	0	0	26137	32088	22201
440	IPI00019169;IPI00644418	cDNA, FLJ96508, Homo sapiens SH3-domain GRB2-like 1 (SH3GL1), mRNA;SH3 domain GRB2-like 1;SH3-domain GRB2-like 1;SH3-domain GRB2-like 1, isoform CRA_b;SH3GL1 protein;SH3-containing Grb-2-like 1 protein;cDNA FLJ58609, highly similar to SH3-containing GRB2-like protein 1	hCG_21932;SH3GL1	cDNA, FLJ96508, Homo sapiens SH3-domain GRB2-like 1 (SH3GL1), mRNA;cDNA FLJ58609, highly similar to SH3-containing GRB2-like protein 1	Q6FGM0;Q9UQD4;B4DRA1;Q9BVL7;Q9BWP4	0	0	0	0	1	0	0	0	0	0	1	0	3.5	41.489	368	0	0	0	0	15031	0
441	IPI00019269;IPI00797907;IPI00789452	Meiotic recombination REC14 protein homolog;WD repeat-containing protein 61;cDNA FLJ61675, highly similar to WD repeat protein 61	WDR61	WD repeat-containing protein 61;cDNA FLJ61675, highly similar to WD repeat protein 61;23 kDa protein	Q9GZS3;B4E387	0	0	0	0	1	0	0	0	0	0	1	1	8.2	33.58	305	0	0	0	0	27599	0
442	IPI00019329	8 kDa dynein light chain;Dynein light chain 1, cytoplasmic;Dynein light chain LC8-type 1;Protein inhibitor of neuronal nitric oxide synthase;cDNA, FLJ92051, Homo sapiens dynein, cytoplasmic, light polypeptide 1 (DNCL1),mRNA;DNCL1 protein;Dynein, light chain, LC8-type 1;Dynein, light chain, LC8-type 1, isoform CRA_a	DLC1;DNCL1;DNCLC1;DYNLL1;HDLC1;hCG_27767	Dynein light chain 1, cytoplasmic	P63167;Q6FGH9	0	0	0	0	1	1	0	1	0	0	0	1	37.1	10.366	89	0	85738	0	0	0	24118
443	IPI00019345;IPI00877120	C21KG;G-22K;GTP-binding protein smg p21A;Ras-related protein Krev-1;Ras-related protein Rap-1A;cDNA FLJ75985, highly similar to Homo sapiens RAP1A, member of RAS oncogene family (RAP1A), transcript variant 2, mRNA;RAP1A, member of RAS oncogene family	KREV1;RAP1A;hCG_1818872;RP4-773A18.1-001	Ras-related protein Rap-1A;RAP1A, member of RAS oncogene family	P62834;A8KAH9;Q5U0C3	0	0	0	0	1	1	0	0	0	0	1	1	22.3	20.987	184	0	0	0	0	214300	49304
444	IPI00019359	Cytokeratin-9;Keratin, type I cytoskeletal 9;Keratin-9	KRT9	Keratin, type I cytoskeletal 9	P35527	0	1	0	0	0	0	0	1	0	1	0	0	3	62.064	623	0	3396.1	0	21227	0	0
445	IPI00019376;IPI00952909;IPI00549434;IPI00658113;IPI00658216;IPI00479741;IPI00941473;IPI00658185;IPI00022082;IPI00787280;IPI00893987;IPI00925967	Septin-11;cDNA FLJ14373 fis, clone HEMBA1001595, highly similar to SEPTIN 2 HOMOLOG	2012-09-11	Isoform 2 of Septin-11;Isoform 1 of Septin-11	Q9NVA2-2;Q9NVA2;Q9NVA2-1;Q96KC0	0	2	0	0	1	2	0	1	0	0	1	1	9.1	50.822	439	0	0	53333	0	121830	128320
446	IPI00019383;IPI00940264	cDNA FLJ56840, highly similar to Galactokinase (EC 2.7.1.6);Galactokinase 1;Galactokinase;Galactose kinase;cDNA FLJ56765, highly similar to Galactokinase (EC 2.7.1.6);cDNA, FLJ79080, highly similar to Galactokinase (EC 2.7.1.6);CDNA FLJ26554 fis, clone LNF01773, highly similar to Galactokinase	GALK1;hCG_27540;GALK	cDNA FLJ56840, highly similar to Galactokinase;Galactokinase	B4E1G6;P51570;B4E1A8;C8CHJ5;C8CHJ6;Q6ZP37;Q71UH7	1	0	1	0	0	0	1	1	1	1	1	1	2.1	45.357	422	1086500	885.54	21663	2247.4	520.61	113.88
447	IPI00019399	Constitutively expressed serum amyloid A protein;Serum amyloid A-4 protein;Amyloid protein A	CSAA;SAA4	Serum amyloid A-4 protein	P35542;B2R5G8	0	1	0	1	0	0	0	1	1	1	1	0	8.5	14.807	130	0	212560	20314	210440	57856	0
448	IPI00019472;IPI00922776;IPI00922487	Baboon M7 virus receptor;Neutral amino acid transporter B(0);RD114/simian type D retrovirus receptor;Sodium-dependent neutral amino acid transporter type 2;Solute carrier family 1 member 5;cDNA, FLJ79445, highly similar to Neutral amino acid transporter B(0);Solute carrier family 1 (Neutral amino acid transporter), member 5 variant;Neutral amino acid transporter;cDNA FLJ58765, highly similar to N…	ASCT2;M7V1;RDR;RDRC;SLC1A5	Neutral amino acid transporter B(0);solute carrier family 1 member 5 isoform 3;solute carrier family 1 member 5 isoform 2	Q15758;B7ZB81;Q59ES3;Q71UA6;B4DE27;B4DR77;B4DWS4	0	1	0	1	0	0	0	2	0	1	1	0	4.1	56.598	541	0	22859	0	97118	24767	0
449	IPI00019502;IPI00395772;IPI00742780;IPI00556012;IPI00642716;IPI00794080;IPI00007856;IPI00298301;IPI00025879;IPI00001753;IPI00007858;IPI00302329;IPI00025880;REV__IPI00007334;REV__IPI00946415;REV__IPI00911038;IPI00910817;IPI00878695;IPI00930303	Cellular myosin heavy chain, type A;Myosin heavy chain 9;Myosin heavy chain, non-muscle IIa;Myosin-9;Non-muscle myosin heavy chain A;Non-muscle myosin heavy chain IIa;cDNA FLJ77145, highly similar to Homo sapiens myosin, heavy polypeptide 9, non-muscle (MYH9), mRNA;cDNA FLJ57040, highly similar to Myosin-9;MYH9 variant protein;Myosin, heavy polypeptide 9, non-muscle, isoform CRA_a;Non-muscle myos…	MYH9;hCG_41454	Isoform 1 of Myosin-9;Isoform 2 of Myosin-9	P35579-1;P35579;A8K6E4;B4E3S1;Q60FE2;Q86XU5;Q99529;P35579-2;Q2PS10;Q9UMJ0	6	26	11	15	25	26	12	20	16	18	25	23	25.9	226.53	1960	3959800	23377000	9764800	6027500	1748200	2931400
450	IPI00019563;IPI00939265;IPI00908338	cDNA FLJ52464, highly similar to GTPase, IMAP family member 4;GTPase IMAP family member 4;Immunity-associated nucleotide 1 protein;Immunity-associated protein 4;cDNA FLJ51351, highly similar to GTPase, IMAP family member 4	GIMAP4;IAN1;IMAP4;MSTP062	cDNA FLJ52464, highly similar to GTPase, IMAP family member 4;GTPase IMAP family member 4;cDNA FLJ51351, highly similar to GTPase, IMAP family member 4	B4DWA5;Q9NUV9;B4DWN0	0	0	2	0	0	0	0	2	2	2	0	0	5	39.019	343	0	25260	119160	43522	0	0
451	IPI00019568;IPI00877967;CON__P00735	Activation peptide fragment 1;Activation peptide fragment 2;Coagulation factor II;Prothrombin;Thrombin heavy chain;Thrombin light chain;cDNA FLJ54622, highly similar to Prothrombin (EC 3.4.21.5);F2 protein;Prothrombin B-chain;Putative uncharacterized protein F2	F2	Prothrombin (Fragment);Putative uncharacterized protein F2	P00734;B4DDT3;Q15253;Q69EZ7;Q69EZ8;Q86WA1;Q8TD58;C9JV37	0	4	0	1	4	2	1	6	4	3	3	3	17	70.036	622	140150	259790	34805	97872	491880	26717
[truncated: 1,173 more rows]
